# Supplementary material for: Identifying genomic changes associated with insecticide resistance in the dengue mosquito Aedes aegypti by deep targeted sequencing
Source: HighWire-hosted journal article supplement (doi:10.1101/gr.189225.115), 2015-07-23
Supplement: Supplemental_Materials.docx [file Supplemental_Materials.docx]

**Supplementary materials**

The following Supplementary tables and figures are compiled into Supplementary file 1:

**Supplementary Table 1.** Sequencing statistics

**Supplementary Table 3.** Associations between gene amplifications and *kdr* mutations.

**Supplementary Table 6.** Primers used for qPCR

**Supplementary Figure 1.** Sequencing coverage across captured regions

**Supplementary Figure 2.** Cross-comparison of CNV data obtained by DNA-seq and qPCR

**Supplementary Figure 3.** Gene amplification levels on individual mosquitoes

**Supplementary Figure 4.** Gene amplifications frequencies across populations

**Supplementary Figure 5.** Comparison of CNV profiles across populations and individuals

**Supplementary Figure 6.** Impact of gene amplifications on transcription levels

**Supplementary Figure 7.** Population structure deduced from PCA analysis.

**Supplementary Figure 8.** Comparison of *kdr* frequencies between DNA-seq and qPCR.

**Supplementary Figure 9.** Comparison of frequency-based filtering and Bayesian approaches.

The following files are independent supplementary materials:

**Supplementary Table 2.** Gene amplifications associated with deltamethrin resistance.

**Supplementary Table 4.** Polymorphism dataset.

**Supplementary Table 5.** Description and location of all captured genes.
