# Supplementary material for: Identifying genomic changes associated with insecticide resistance in the dengue mosquito Aedes aegypti by deep targeted sequencing
Source: HighWire-hosted journal article supplement (doi:10.1101/gr.189225.115), 2015-07-23
Supplement: Supplemental_Table_2_gene_amplifications.xlsx [file Supplemental_Table_2_gene_amplifications.xlsx]

## Sheet: Feuil1
Supplementary Table 2. Genes affected by gene amplifications associated with deltamethrin resistance
Gene ID			Descriptiona		FC versus all susceptible strainsb											FC (R+ / R-)c
	Supercontig	Chromosome			Delta		Phet		Nakh		Cayn		StGe			Delta R	Phet R	Nakh R	Cayn R	StGe R
					R-	R+	R-	R+	R-	R+	R-	R+	R-	R+
AAEL002212	supercont1.51	Unk_Chr	cuticle protein		1.56517	1.23796	1.00857	-1.17307	-1.04769	-1.00486	1.24129	1.12083	1.52666	1.57525		0.790943	-1.16311	0.0428277	0.902954	1.03183
AAEL002901	supercont1.71	Unk_Chr	short-chain dehydrogenase		-1.21109	-1.48121	1.70782	1.79299	-1.47888	-1.32501	-1.53562	-1.73986	-1.7809	-1.91092		1.22304	1.04987	0.153874	1.133	1.07301
AAEL005101	supercont1.142	chr2	carboxy/choline esterase CCEAE4A		-1.06129	1.06619	1.30906	2.62734	6.44224	11.4862	1.05962	1.0947	1.43161	1.4141		-1.00461	2.00704	5.04393	1.03311	0.987773
AAEL005112	supercont1.142	chr2	carboxy/choline esterase CCEAE3A		-1.11234	1.02544	1.45546	3.5115	8.63705	15.2294	1.01821	1.03815	1.31956	1.44584		-0.921882	2.41263	6.59233	1.01958	1.0957
AAEL005122	supercont1.142	chr2	carboxy/choline esterase CCEAE6A		-1.00898	-1.01347	1.41315	3.10702	8.70336	15.1089	1.28206	1.25364	1.80059	1.75883		1.00445	2.19865	6.40553	0.97783	0.976808
AAEL005954	supercont1.181	chr1	chloride channel protein 2		3.34115	3.702	3.27716	3.3806	1.96667	1.62448	-1.09274	-1.2653	1.27079	1.19789		1.108	1.03157	-0.342192	1.15791	0.942638
AAEL006014	supercont1.186	Unk_Chr	heme peroxidase HPX1		1.52214	1.28419	1.65752	1.73501	1.75238	1.66617	-1.08308	0.999047	1.04371	1.05366		0.843674	1.04675	-0.0862086	0.924175	1.00953
AAEL006795	supercont1.221	chr3	cytochrome P450 CYP9J15		1.02859	-1.04841	1.39716	1.36502	1.20395	1.05321	1.70368	1.7711	1.58807	1.68444		-1.01928	0.977001	-0.15074	1.03957	1.06068
AAEL006798	supercont1.221	chr3	cytochrome P450 CYP9J10		1.0688	1.02479	1.62825	1.73703	1.40469	1.39579	-1.31039	-1.18114	-1.40539	-1.05453		0.958824	1.06681	-0.008896	0.901364	0.750344
AAEL006805	supercont1.221	chr3	cytochrome P450 CYP9J2		-1.03644	-1.06596	1.08191	1.09611	-1.03595	-1.15371	1.3754	1.42161	1.4781	1.69289		1.02848	1.01313	-0.117762	1.0336	1.14531
AAEL006811	supercont1.221	chr3	cytochrome P450 CYP9J8		1.31151	1.1262	2.1664	2.01377	1.80939	1.44046	1.82827	1.92428	1.81645	1.91392		0.858703	0.929548	-0.368932	1.05251	1.05366
AAEL006814	supercont1.221	chr3	cytochrome P450 CYP9J20		1.22437	1.10252	2.26092	2.06561	1.80299	1.67924	2.00115	1.96028	1.85657	1.97264		0.900481	0.913615	-0.123754	0.979575	1.06252
AAEL006815	supercont1.221	chr3	cytochrome P450 CYP9J16		-1.03999	-1.09274	1.19978	1.21008	-1.01058	-1.07064	1.64601	1.78303	1.78832	1.99975		1.05072	1.00858	-0.0600603	1.08324	1.11823
AAEL007951	supercont1.291	Unk_Chr	glutathione transferase GSTE2		-1.38289	-1.56779	3.01487	3.03983	2.8568	2.62073	-1.31977	-1.18168	-1.02748	-1.07368		1.1337	1.00828	-0.236074	0.895366	1.04496
AAEL009119	supercont1.371	chr2	conserved hypothetical protein		1.50147	1.35826	1.44463	1.63669	1.22937	1.18369	1.16622	1.08069	-1.12114	-1.21572		0.904622	1.13295	-0.0456829	0.926664	1.08436
AAEL011835	supercont1.620	Unk_Chr	voltage-gated potassium channel		1.0681	-1.03161	1.26229	1.0101	-1.1795	1.03784	2.18397	2.16604	1.96077	2.18195		-0.965837	0.80021	2.21734	0.99179	1.1128
AAEL012491	supercont1.702	chr1	cytochrome P450 CYP6P12		-1.7738	-2.28461	1.60253	2.02338	1.59925	1.84788	-2.11255	-4.58015	-2.65222	-3.48494		1.28797	1.26261	0.248628	2.16806	1.31397
AAEL012492	supercont1.702	chr1	cytochrome P450 CYP6AA5		-1.64027	-1.6141	1.85485	2.31472	1.54533	1.88877	-2.09507	-4.12463	-1.47458	-2.24154		0.984046	1.24793	0.343446	1.96873	1.52011
AAEL013556	supercont1.869	Unk_Chr	cytochrome P450 CYP4J15		1.42385	1.48453	1.00205	-1.05925	-1.42709	-1.20574	1.40622	1.58555	1.57445	1.69261		1.04262	-1.05708	0.22135	1.12753	1.07505
AAEL013972	supercont1.975	Unk_Chr	sulfotransferase		1.05173	1.27028	1.42254	2.12508	1.59706	2.00457	-1.84834	-2.51796	-1.44114	-1.78411		1.2078	1.49387	0.407518	1.36229	1.23798
AAEL013976	supercont1.975	Unk_Chr	sulfotransferase		-1.04424	-1.01791	1.40571	1.851	1.16651	1.92078	-1.46909	-1.64424	-1.26432	-1.58465		0.974783	1.31678	0.754271	1.11922	1.25336
AAEL014371	supercont1.1092	Unk_Chr	glycosyltransferase		1.57819	1.71365	-1.3113	-1.5298	-2.34171	-1.6557	1.54893	1.73372	-1.14207	-1.07343		1.08584	1.16663	0.686013	1.1193	0.939893
AAEL014603	supercont1.1188	chr3	cytochrome P450 CYP9J30		-1.07594	-1.19405	1.04937	1.00565	1.13801	1.03873	1.43389	1.5228	1.40258	1.47512		1.10977	0.958336	-0.0992751	1.06201	1.05172
AAEL014607	supercont1.1188	chr3	cytochrome P450 CYP9J?		1.05133	-1.04976	1.3953	1.47395	1.67151	1.3895	1.51702	1.6031	1.7287	1.83172		-0.998511	1.05637	-0.282006	1.05675	1.05959
AAEL014608	supercont1.1188	chr3	cytochrome P450 CYP9J?		-2.4286	-2.57463	1.68712	1.45075	1.82428	1.98815	1.04296	1.01059	1.46425	1.73613		1.06013	0.859894	0.163868	0.968962	1.18568
AAEL014612	supercont1.1188	chr3	cytochrome P450 CYP9J?		1.45659	1.30881	1.72719	1.57158	1.98456	2.20812	1.37202	1.75379	1.51791	1.52871		0.898543	0.909906	0.223556	1.27826	1.00712
AAEL014614	supercont1.1188	chr3	cytochrome P450 CYP9J?		-1.31231	-1.59986	2.11967	1.92168	2.3024	2.1433	2.74184	2.73225	3.15198	3.32472		1.21911	0.906593	-0.1591	0.996503	1.0548
AAEL014615	supercont1.1188	chr3	cytochrome P450 CYP9J23		-1.18526	-1.22189	1.76849	1.65169	1.71649	1.60075	1.37104	1.33272	1.4018	1.55069		1.0309	0.933959	-0.115745	0.972052	1.10621
AAEL014617	supercont1.1188	chr3	cytochrome P450 CYP9J28		1.05459	-1.05327	1.52844	1.55188	1.17139	1.00417	1.51979	1.58204	1.41126	1.42225		-0.998744	1.01534	-0.167217	1.04096	1.00779
AAEL014618	supercont1.1188	chr3	cytochrome P450 CYP9F?		-1.27024	-1.39808	1.75868	1.63133	2.25633	2.35375	1.3073	1.3807	1.40969	1.5635		1.10064	0.927586	0.097418	1.05614	1.10911
AAEL014619	supercont1.1188	chr3	cytochrome P450 CYP9J?		-1.1318	-1.41127	1.50809	1.35463	2.28503	2.09263	1.84525	1.84674	1.91396	1.9343		1.24693	0.898241	-0.192393	1.00081	1.01063
AAEL014667	supercont1.1213	Unk_Chr	brain chitinase and chia		1.18639	1.13842	1.28969	1.28914	-1.42147	-1.39369	1.58226	1.6787	1.6224	1.54681		0.959573	0.999575	0.0277743	1.06095	0.953412
AAEL014689	supercont1.1220	Unk_Chr	NADPH cytochrome P450 reductase		-1.29081	-1.36237	1.49611	1.57812	1.67235	1.69915	1.2834	1.2981	1.3319	1.26058		1.05544	1.05481	0.0267972	1.01146	0.946447
AAEL014890	supercont1.1327	Unk_Chr	cytochrome P450 CYP6CC1		-1.13043	-1.21482	1.05853	-1.07805	-1.06273	-1.28756	2.74441	3.07223	2.16732	2.38756		1.07466	-1.01844	-0.224826	1.11945	1.10162
AAEL014891	supercont1.1327	Unk_Chr	cytochrome P450 CYP6P?		2.00829	1.87093	1.28533	-1.47838	1.09595	-1.86651	5.80527	7.03886	5.00299	5.7986		0.931605	-1.1502	-2.96246	1.2125	1.15903
AAEL014892	supercont1.1327	Unk_Chr	cytochrome P450 CYP6P?		1.68633	1.55258	1.00492	-1.41461	-1.12623	-1.75231	3.76259	4.58202	3.56373	3.96093		0.920687	-1.40769	-0.626075	1.21778	1.11146
AAEL014893	supercont1.1327	Unk_Chr	cytochrome P450 CYP6BB2		-1.26318	-1.41836	1.04745	-1.04207	-1.01011	-1.0328	2.1131	2.38787	1.95545	2.1104		1.12285	-0.994868	-0.022691	1.13003	1.07924
AAEL015264	supercont1.1678	Unk_Chr	alpha-esterase		0.996748	1.25683	1.05707	1.84281	4.11282	7.60619	-2.67878	-2.22623	-2.34533	-2.33039		-1.25274	1.74333	3.49337	0.831061	0.993631
AAEL015362	supercont1.1912	Unk_Chr	cytochrome P450 CYP325?		2.84428	3.18583	1.33174	1.05735	-2.50539	-2.55768	-2.63999	-2.74665	-2.67288	-3.04228		1.12009	0.793966	-0.0522914	1.0404	1.1382
AAEL015563	supercont1.3299	Unk_Chr	cytochrome P450 CYP325?		1.55165	1.56657	-3.31096	-2.92175	-3.15153	-2.04557	1.1439	1.03331	1.49413	1.54107		1.00962	0.882446	1.10597	0.903325	1.03142
AAEL017366	supercont1.1188	chr3	cytochrome P450 CYP9J?		-1.39948	-1.49536	2.36144	2.12749	2.60307	2.53405	1.45577	1.48642	1.44432	1.50849		1.06851	0.900928	-0.069016	1.02105	1.04443
a: P450 names ending with interrogation marks are not official. Their CYP subfamily is proposed according to best protein homology in mosquitoes.
b: Differential coverage is indicated for all genes as fold change (FC) between each resistant strain (R+ phenotype) and the mean coverage of all susceptible strains.
c: Differential coverage is indicated for all genes as fold change (FC) between each R+ phenotype (LD75 survivors) and its R- counterpart (LD25 deads).
Values supporting criteria used for identifying gene amplifications linked to deltamethrin resistance are shown in bold ([R+/mean S] > 1.5 and [R+/R-] > 1).
