# Supplementary material for: Identifying genomic changes associated with insecticide resistance in the dengue mosquito Aedes aegypti by deep targeted sequencing
Source: HighWire-hosted journal article supplement (doi:10.1101/gr.189225.115), 2015-07-23
Supplement: Supplemental_Table_4_polymorphism_dataset.xlsx [file Supplemental_Table_4_polymorphism_dataset.xlsx]

## Sheet: Suppl Table 3
Location (supercontig:position)	Reference allele	Variant allele	Variant Type	Gene ID	Transcript ID	Biological category	Description	Genic effect	Position in cDNA	Position in protein	Amino acid change		Bayescan3 Fsc q value (Laboratory)	Bayescan3 Fsc q value (S. America)	Bayescan3 Fsc q value (Thailand)	Identified from frequency-based filtering	Identified from Bayescan3 filtering	Best candidates (Figure 4)		Supporting reads BoraS (%)	Total reads BoraS	SNP call BoraS		Supporting reads DeltaR+ (%)	Total reads DeltaR+	SNP call DeltaR+		Supporting reads DeltaR- (%)	Total reads DeltaR-	SNP call DeltaR-		Supporting reads NwOrS (%)	Total reads NwOrS	SNP call NwOrS		Supporting reads CaynR+ (%)	Total reads CaynR+	SNP call CaynR+		Supporting reads CaynR-(%)	Total reads CaynR-	SNP call CaynR-		Supporting reads StGeR+ (%)	Total reads StGeR+	SNP call StGeR+		Supporting reads StGeR- (%)	Total reads StGeR-
supercont1.1:2360795	G	C	Substitution	AAEL000092	AAEL000092-RA	GST	glutathione transferase GSTX1	NON_SYNONYMOUS_CODING	23	8	S>T		0.89494	0.90505	0.89535	Cayn	-	-		66.9291	127	C/G		49.6124	129	C/G		32.2034	118	C/G		5.08475	118	ref		66.6667	120	C/G		59.0164	122	C/G		46.2121	132	C/G		45	180
supercont1.1:2360847	A	T	Substitution	AAEL000092	AAEL000092-RA	GST	glutathione transferase GSTX1	SYNONYMOUS_CODING	75	25	G>G		0.89073	0.90391	0.90344	-	-	-		62.5	80	overlap		43.75	96	overlap		55.7143	70	overlap		99.0099	101	T		67.6191	105	A/T		93.1034	87	T		85.5769	104	overlap		94.6309	149
supercont1.1:2360870	G	T	Substitution	AAEL000092	AAEL000092-RA	GST	glutathione transferase GSTX1	SPLICE_SITE					0.039982	0.89994	0.90433	Lab	Laboratory	Yes		25	48	ref		93.8776	49	T		55.5556	36	G/T		1.19048	84	ref		28.7234	94	ref		12.987	77	G/T		13.3333	90	G/T		9.16667	120
supercont1.1:2360872	T	G	Substitution	AAEL000092	AAEL000092-RA	GST	glutathione transferase GSTX1	INTRONIC					0.18022	0.8985	0.89502	-	-	-		41.6667	48	G/T		0	49	ref		0	35	ref		0	90	ref		25.5102	98	ref		49.3507	77	G/T		21.7391	92	G/T		17.2131	122
supercont1.1:2360956	T	C	Substitution	AAEL000092	AAEL000092-RA	GST	glutathione transferase GSTX1	SYNONYMOUS_CODING	117	39	G>G		0.88545	0.77349	0.88797	-	-	-		31.9444	72	C/T		39.8058	103	C/T		38.4615	78	C/T		9.87654	81	ref		4.41176	68	ref		8.16327	98	ref		8.54701	117	ref		14.359	195
supercont1.1:2360965	C	T	Substitution	AAEL000092	AAEL000092-RA	GST	glutathione transferase GSTX1	SYNONYMOUS_CODING	126	42	R>R		0.88214	0.78223	0.89679	-	-	-		32.9897	97	C/T		44.9153	118	C/T		48.2353	85	C/T		7.27273	110	ref		6.06061	99	ref		9.18367	98	ref		12.5	128	C/T		16.5899	217
supercont1.1:2361002	A	G	Substitution	AAEL000092	AAEL000092-RA	GST	glutathione transferase GSTX1	NON_SYNONYMOUS_CODING	163	55	I>V		0.39598	0.90445	0.89467	-	-	-		22.6562	128	ref		0	182	ref		0	143	ref		0	151	ref		28.1481	135	A/G		33.8583	127	A/G		18.1818	176	A/G		14.8855	262
supercont1.1:2361004	C	T	Substitution	AAEL000092	AAEL000092-RA	GST	glutathione transferase GSTX1	SYNONYMOUS_CODING	165	55	I>I		0.89762	0.89801	0.89884	-	-	-		23.622	127	ref		49.7207	179	C/T		40.6897	145	C/T		0.671141	149	ref		27.2727	132	ref		13.1783	129	C/T		16.092	174	C/T		6.94981	259
supercont1.1:2361007	G	C	Substitution	AAEL000092	AAEL000092-RA	GST	glutathione transferase GSTX1	SYNONYMOUS_CODING	168	56	P>P		0.74973	0.83883	0.90032	-	-	-		54.9618	131	C/G		50.5814	172	C/G		58.7838	148	C/G		12.0805	149	ref		8.82353	136	ref		8.8	125	C/G		19.209	177	C/G		24.6154	260
supercont1.1:2361109	C	T	Substitution	AAEL000092	AAEL000092-RA	GST	glutathione transferase GSTX1	SYNONYMOUS_CODING	270	90	P>P		0.83979	0.84722	0.87341	-	-	-		11.1888	143	ref		9.60452	177	C/T		5.81395	172	ref		0	192	ref		0	139	ref		0	158	ref		0	182	ref		0	263
supercont1.1:2361115	A	G	Substitution	AAEL000092	AAEL000092-RA	GST	glutathione transferase GSTX1	SYNONYMOUS_CODING	276	92	E>E		0.89727	0.89931	0.90399	-	-	-		20.2614	153	ref		44.382	178	A/G		39.3064	173	A/G		0.531915	188	ref		22.6027	146	ref		8.64198	162	A/G		10.4972	181	A/G		8.67924	265
supercont1.1:2361136	T	C	Substitution	AAEL000092	AAEL000092-RA	GST	glutathione transferase GSTX1	SYNONYMOUS_CODING	297	99	V>V		0.27932	0.90036	0.89556	-	-	-		27.451	153	C/T		0	172	ref		0	197	ref		0	186	ref		28.7671	146	C/T		27.1084	166	C/T		22.5275	182	C/T		16.4062	256
supercont1.1:2361196	C	T	Substitution	AAEL000092	AAEL000092-RA	GST	glutathione transferase GSTX1	SYNONYMOUS_CODING	357	119	Y>Y		0.85521	0.89762	0.8942	-	-	-		43.4524	168	C/T		35.6725	171	C/T		35.2941	170	C/T		0	155	ref		4.16667	168	ref		3.3557	149	ref		13.6646	161	C/T		5.40541	259
supercont1.1:2361265	A	G	Substitution	AAEL000092	AAEL000092-RA	GST	glutathione transferase GSTX1	SYNONYMOUS_CODING	426	142	E>E		0.81146	0.90495	0.49688	Cayn; StGe	-	-		0	174	ref		0	146	ref		0	153	ref		99.3548	155	G		34.9206	126	A/G		45.1613	124	A/G		45.7364	129	A/G		54.0426	235
supercont1.1:2361274	G	A	Substitution	AAEL000092	AAEL000092-RA	GST	glutathione transferase GSTX1	SYNONYMOUS_CODING	435	145	L>L		0.12216	0.90478	0.89905	-	-	-		34.4633	177	A/G		0	141	ref		0	140	ref		0	154	ref		33.3333	129	A/G		32.2581	124	A/G		20.6349	126	A/G		16.6667	228
supercont1.1:2361337	G	A	Substitution	AAEL000092	AAEL000092-RA	GST	glutathione transferase GSTX1	SYNONYMOUS_CODING	498	166	T>T		0.84769	0.8854	0.90136	Cayn	-	-		66.3717	113	A/G		69.9115	113	A/G		67.2131	122	A/G		0	121	ref		53.2609	92	A/G		38.3721	86	A/G		26.087	115	A/G		21.6667	180
supercont1.1:2361360	C	T	Substitution	AAEL000092	AAEL000092-RA	GST	glutathione transferase GSTX1	SPLICE_SITE					0.87274	0.89774	0.88853	Cayn	-	-		55.1724	87	C/T		64.6342	82	C/T		62.2642	106	C/T		0	104	ref		48.5714	70	C/T		32.7869	61	C/T		22.2222	99	C/T		16.5644	163
supercont1.1:2361368	G	A	Substitution	AAEL000092	AAEL000092-RA	GST	glutathione transferase GSTX1	INTRONIC					0.8767	0.89487	0.90266	-	-	-		0	79	ref		16.9231	65	A/G		16.4835	91	A/G		0	98	ref		9.83606	61	ref		0	64	ref		4.12371	97	ref		3.26797	153
supercont1.1:2361393	A	T	Substitution	AAEL000092	AAEL000092-RA	GST	glutathione transferase GSTX1	INTRONIC					0.88394	0.8924	0.88257	Cayn	-	-		50	64	A/T		56.9231	65	A/T		60.9375	64	A/T		0	93	ref		44	50	A/T		36.1702	47	A/T		13.5802	81	A/T		15.7895	133
supercont1.1:2361400	A	G	Substitution	AAEL000092	AAEL000092-RA	GST	glutathione transferase GSTX1	INTRONIC					0.89004	0.89685	0.89218	Cayn	-	-		91.6667	72	G		62.5	64	A/G		48.5714	70	A/G		0	89	ref		49.0909	55	A/G		41.3043	46	A/G		32.4324	74	A/G		25.9843	127
supercont1.1:2361405	A	T	Substitution	AAEL000092	AAEL000092-RA	GST	glutathione transferase GSTX1	SPLICE_SITE					0.89383	0.89981	0.75201	-	-	-		2.89855	69	ref		21.2121	66	A/T		6.06061	66	ref		0	88	ref		14.8148	54	ref		3.84615	52	ref		1.28205	78	ref		2.38095	126
supercont1.1:2361490	G	A	Substitution	AAEL000092	AAEL000092-RA	GST	glutathione transferase GSTX1	SYNONYMOUS_CODING	591	197	E>E		0.5171	0.87186	0.90085	Cayn	-	-		100	64	A		100	60	A		100	62	A		0	65	ref		62.7451	51	A/G		48.9362	47	A/G		29.2308	65	A/G		28.0899	89
supercont1.1:2361524	T	A	Substitution	AAEL000092	AAEL000092-RA	GST	glutathione transferase GSTX1	NON_SYNONYMOUS_CODING	625	209	L>M		0.89186	0.89577	0.87006	-	-	-		5.66038	53	ref		35.0877	57	A/T		30.9091	55	A/T		0	71	ref		23.8095	42	ref		7.5	40	ref		3.125	64	ref		7.86517	89
supercont1.1:2714090	T	C	Substitution	AAEL000004	AAEL000004-RA	UGT	glycosyltransferase	3PRIME_UTR	2514				0.88473	0.90145	0.90487	Nakh	-	-		35.2113	71	C/T		41.8605	43	C/T		71.4286	35	C/T		0	42	ref		16.3265	49	ref		19.2982	57	C/T		28.5714	49	C/T		30	70
supercont1.1:2714122	T	G	Substitution	AAEL000004	AAEL000004-RA	UGT	glycosyltransferase	3PRIME_UTR	2482				0.85953	0.90165	0.90105	Nakh	-	-		38.3562	73	G/T		39.1892	74	G/T		67.8571	56	G/T		0	61	ref		13.2353	68	ref		14.4928	69	G/T		27.2727	66	G/T		32.5	80
supercont1.1:2714135	TG	T	Deletion	AAEL000004	AAEL000004-RA	UGT	glycosyltransferase	3PRIME_UTR	2468				na	na	na	-	na	-		7.04225	71	ref		25	76	T/TG		25.8065	62	T/TG		0	63	ref		3.84615	78	ref		2.98507	67	ref		11.1111	72	T/TG		5.55556	90
supercont1.1:2714158	G	T	Substitution	AAEL000004	AAEL000004-RA	UGT	glycosyltransferase	3PRIME_UTR	2446				0.87726	0.89459	0.89431	-	-	-		0	66	ref		0	92	ref		0	69	ref		0	79	ref		12.1951	82	ref		12.8571	70	G/T		14.0845	71	G/T		19.0476	105
supercont1.1:2714181	G	C	Substitution	AAEL000004	AAEL000004-RA	UGT	glycosyltransferase	3PRIME_UTR	2423				0.89544	0.8932	0.87341	-	-	-		8.4507	71	ref		25.5102	98	C/G		36.3636	77	C/G		0	86	ref		5.61798	89	ref		2.53165	79	ref		13.6364	88	C/G		5.40541	111
supercont1.1:2714298	A	T	Substitution	AAEL000004	AAEL000004-RA	UGT	glycosyltransferase	3PRIME_UTR	2306				0.76822	0.89356	0.89999	-	-	-		0	83	ref		0	79	ref		0	74	ref		0	79	ref		0	88	ref		0	48	ref		6.66667	75	ref		4.70588	85
supercont1.1:2714358	C	A	Substitution	AAEL000004	AAEL000004-RA	UGT	glycosyltransferase	3PRIME_UTR	2246				0.89599	0.88568	0.8949	-	-	-		9.45946	74	ref		40.9091	66	A/C		23.2143	56	A/C		0	75	ref		0	54	ref		0	47	ref		1.35135	74	ref		0	85
supercont1.1:2714384	T	TA	Insertion	AAEL000004	AAEL000004-RA	UGT	glycosyltransferase	3PRIME_UTR	2219				na	na	na	-	na	-		0	63	ref		0	51	ref		0	53	ref		0	71	ref		0	51	ref		0	34	ref		0	63	ref		0	93
supercont1.1:2714392	A	T	Substitution	AAEL000004	AAEL000004-RA	UGT	glycosyltransferase	3PRIME_UTR	2212				0.89348	0.89168	0.15561	Nakh	-	-		11.1111	63	ref		27.4194	62	A/T		35.8491	53	A/T		0	67	ref		3.22581	62	ref		2.7027	37	ref		6.55738	61	ref		8.51064	94
supercont1.1:2714401	A	G	Substitution	AAEL000004	AAEL000004-RA	UGT	glycosyltransferase	3PRIME_UTR	2203				0.88878	0.8985	0.90276	Nakh	-	-		27.3973	73	ref		40.2985	67	A/G		53.4483	58	A/G		0	77	ref		14.7059	68	ref		26.3158	38	A/G		25.4237	59	A/G		37.7358	106
supercont1.1:2714471	T	A	Substitution	AAEL000004	AAEL000004-RA	UGT	glycosyltransferase	3PRIME_UTR	2133				0.80586	0.90132	0.90148	-	-	-		0	123	ref		0	116	ref		0	94	ref		0	117	ref		11.4286	140	ref		20.1835	109	A/T		20	100	A/T		13.3758	157
supercont1.1:2714519	C	T	Substitution	AAEL000004	AAEL000004-RA	UGT	glycosyltransferase	SYNONYMOUS_CODING	2085	516	E>E		0.60118	0.89685	0.90177	-	-	-		0	122	ref		0	115	ref		0	111	ref		0	113	ref		17.5	160	ref		18.8034	117	C/T		18.8525	122	C/T		23.9362	188
supercont1.1:2714589	C	G	Substitution	AAEL000004	AAEL000004-RA	UGT	glycosyltransferase	NON_SYNONYMOUS_CODING	2015	493	S>T		0.89004	0.87779	0.88933	-	-	-		6.75676	148	ref		17.6101	159	C/G		22.4	125	C/G		0	151	ref		0	147	ref		0	147	ref		0	151	ref		0	225
supercont1.1:2714614	C	T	Substitution	AAEL000004	AAEL000004-RA	UGT	glycosyltransferase	NON_SYNONYMOUS_CODING	1990	485	V>I		0.88921	0.88802	0.88516	-	-	-		7.18954	153	ref		17.1975	157	C/T		18.2482	137	C/T		0	151	ref		0	154	ref		0	152	ref		0	166	ref		0	230
supercont1.1:2714633	T	G	Substitution	AAEL000004	AAEL000004-RA	UGT	glycosyltransferase	NON_SYNONYMOUS_CODING	1971	478	E>D		0.87613	0.87379	0.88477	-	-	-		6.57895	152	ref		14.2857	161	G/T		21.7687	147	G/T		0	165	ref		0	157	ref		0.617284	162	ref		0	177	ref		0	231
supercont1.1:2714642	A	G	Substitution	AAEL000004	AAEL000004-RA	UGT	glycosyltransferase	SYNONYMOUS_CODING	1962	475	Y>Y		0.8842	0.88841	0.89351	-	-	-		5.38462	130	ref		13.7255	153	A/G		24.1135	141	A/G		0	148	ref		0	151	ref		0	165	ref		0	179	ref		0	238
supercont1.1:2714699	C	T	Substitution	AAEL000004	AAEL000004-RA	UGT	glycosyltransferase	SYNONYMOUS_CODING	1905	456	E>E		0.76822	0.89931	0.89631	-	-	-		0	143	ref		0	163	ref		0	196	ref		0	176	ref		16.6667	174	ref		24.1611	149	C/T		25.1462	171	C/T		26.5306	245
supercont1.1:2714792	C	T	Substitution	AAEL000004	AAEL000004-RA	UGT	glycosyltransferase	SYNONYMOUS_CODING	1812	425	K>K		0.89327	0.88141	0.86036	-	-	-		9.27152	151	ref		23.622	127	C/T		30.7692	169	C/T		0	179	ref		0	165	ref		0	153	ref		0	161	ref		0	260
supercont1.1:2714825	G	A	Substitution	AAEL000004	AAEL000004-RA	UGT	glycosyltransferase	SYNONYMOUS_CODING	1779	414	H>H		0.84769	0.88841	0.87779	-	-	-		19.5652	138	ref		16.9231	130	A/G		20.3593	167	A/G		0.558659	179	ref		0	164	ref		0	130	ref		0	151	ref		0	231
supercont1.1:2714843	G	T	Substitution	AAEL000004	AAEL000004-RA	UGT	glycosyltransferase	SYNONYMOUS_CODING	1761	408	P>P		0.89431	0.89751	0.90199	-	-	-		24.1135	141	ref		47.3282	131	G/T		59.4937	158	G/T		0	178	ref		17.1271	181	ref		24.4444	135	G/T		37.4194	155	G/T		32.0346	231
supercont1.1:2714857	A	G	Substitution	AAEL000004	AAEL000004-RA	UGT	glycosyltransferase	SYNONYMOUS_CODING	1747	404	L>L		0.86207	0.90022	0.88391	-	-	-		0	149	ref		0	140	ref		0	157	ref		0	180	ref		2.13904	187	ref		3.73134	134	ref		12.5	152	A/G		5.77778	225
supercont1.1:2714867	G	A	Substitution	AAEL000004	AAEL000004-RA	UGT	glycosyltransferase	SYNONYMOUS_CODING	1737	400	T>T		0.89752	0.86853	0.87779	-	-	-		3.52113	142	ref		27.1523	151	A/G		33.9623	159	A/G		0	187	ref		0	192	ref		0	143	ref		0	147	ref		0	234
supercont1.1:2714903	G	A	Substitution	AAEL000004	AAEL000004-RA	UGT	glycosyltransferase	SYNONYMOUS_CODING	1701	388	S>S		0.80586	0.89182	0.8821	-	-	-		20.7407	135	ref		17.5325	154	A/G		26.9504	141	A/G		0	173	ref		0	177	ref		0	144	ref		0	144	ref		0	221
supercont1.1:2714953	C	T	Substitution	AAEL000004	AAEL000004-RA	UGT	glycosyltransferase	NON_SYNONYMOUS_CODING	1651	372	D>N		0.60378	0.90109	0.84308	Cayn	-	-		61.9048	126	C/T		12.1951	123	C/T		8.33333	144	C/T		9.09091	132	ref		50	136	C/T		39.4958	119	C/T		8.8	125	C/T		5.29412	170
supercont1.1:2715104	A	G	Substitution	AAEL000004	AAEL000004-RA	UGT	glycosyltransferase	INTRONIC					0.8878	0.89621	0.87836	-	-	-		26.1261	111	ref		15.2381	105	A/G		25.7732	97	A/G		0	90	ref		2.08333	96	ref		6.59341	91	ref		9.52381	63	ref		9.01639	122
supercont1.1:2715116	C	G	Substitution	AAEL000004	AAEL000004-RA	UGT	glycosyltransferase	INTRONIC					0.89494	0.90481	0.89861	StGe	-	-		85.0467	107	G		68.1034	116	C/G		79.6117	103	C/G		11.2069	116	ref		80.9091	110	G		80.8081	99	C/G		64.7887	71	C/G		49.5868	121
supercont1.1:2715138	A	T	Substitution	AAEL000004	AAEL000004-RA	UGT	glycosyltransferase	INTRONIC					0.89524	0.86985	0.88592	-	-	-		7.69231	117	ref		26.5151	132	A/T		37.2093	129	A/T		0	131	ref		0	130	ref		0	127	ref		0	98	ref		0	161
supercont1.1:2715179	G	A	Substitution	AAEL000004	AAEL000004-RA	UGT	glycosyltransferase	SYNONYMOUS_CODING	1488	317	F>F		0.89639	0.87379	0.87478	-	-	-		23.8462	130	ref		43.8272	162	A/G		60.1449	138	A/G		0.675676	148	ref		0	139	ref		0	157	ref		0	119	ref		0	169
supercont1.1:2715203	A	G	Substitution	AAEL000004	AAEL000004-RA	UGT	glycosyltransferase	SYNONYMOUS_CODING	1464	309	I>I		0.87549	0.8907	0.89186	-	-	-		0	147	ref		0	158	ref		0	143	ref		0	146	ref		1.6129	124	ref		4.51613	155	ref		9.17431	109	A/G		5.52764	199
supercont1.1:2715251	A	T	Substitution	AAEL000004	AAEL000004-RA	UGT	glycosyltransferase	SYNONYMOUS_CODING	1416	293	S>S		0.86559	0.90085	0.89364	-	-	-		0	166	ref		0	155	ref		0	180	ref		0	169	ref		16.8831	154	ref		16.5605	157	A/T		17.3913	138	A/T		10.7884	241
supercont1.1:2715259	C	T	Substitution	AAEL000004	AAEL000004-RA	UGT	glycosyltransferase	NON_SYNONYMOUS_CODING	1408	291	V>I		0.85521	0.90199	0.89061	-	-	-		0	171	ref		0	163	ref		0	175	ref		0	170	ref		17.5676	148	ref		19.0476	168	C/T		17.3913	138	C/T		11.9835	242
supercont1.1:2715281	A	T	Substitution	AAEL000004	AAEL000004-RA	UGT	glycosyltransferase	SYNONYMOUS_CODING	1386	283	L>L		0.76078	0.89919	0.89815	-	-	-		0	163	ref		0	177	ref		0	179	ref		0	172	ref		16.5563	151	ref		18.7845	181	A/T		18.7879	165	overlap		13.6691	278
supercont1.1:2715389	A	G	Substitution	AAEL000004	AAEL000004-RA	UGT	glycosyltransferase	SYNONYMOUS_CODING	1278	247	N>N		0.80268	0.79738	0.88349	-	-	-		0	151	ref		0	183	ref		0	189	ref		90.6832	161	G		0	171	ref		1.63043	184	ref		0	152	ref		0	249
supercont1.1:2715485	C	T	Substitution	AAEL000004	AAEL000004-RA	UGT	glycosyltransferase	SYNONYMOUS_CODING	1182	215	G>G		0.89647	0.89591	0.89775	-	-	-		13.4921	126	ref		33.5366	164	C/T		49.3151	146	C/T		0	155	ref		10.7438	121	ref		17.9641	167	C/T		19.7368	152	C/T		11.8321	262
supercont1.1:2715500	A	G	Substitution	AAEL000004	AAEL000004-RA	UGT	glycosyltransferase	SYNONYMOUS_CODING	1167	210	D>D		0.89773	0.88802	0.89022	-	-	-		6.87023	131	ref		26.0116	173	A/G		33.7748	151	A/G		0	157	ref		0	119	ref		0	152	ref		0	160	ref		0	268
supercont1.1:2715629	A	C	Substitution	AAEL000004	AAEL000004-RA	UGT	glycosyltransferase	SYNONYMOUS_CODING	1038	167	T>T		0.89752	0.83306	0.89042	-	-	-		11.1842	152	ref		34.6821	173	A/C		21.0811	185	A/C		0	151	ref		0	162	ref		0	179	ref		0	169	ref		0	256
supercont1.1:2715653	C	T	Substitution	AAEL000004	AAEL000004-RA	UGT	glycosyltransferase	SYNONYMOUS_CODING	1014	159	A>A		0.83272	0.89813	0.89376	-	-	-		0	161	ref		0	191	ref		0	187	ref		0	158	ref		13.9073	151	ref		16.092	174	C/T		16.2791	172	C/T		19.3676	253
supercont1.1:2715659	T	A	Substitution	AAEL000004	AAEL000004-RA	UGT	glycosyltransferase	SYNONYMOUS_CODING	1008	157	P>P		0.88815	0.89605	0.89061	-	-	-		0	162	ref		0	192	ref		0	189	ref		0	167	ref		1.36054	147	ref		5.38922	167	ref		7.77778	180	A/T		7.03704	270
supercont1.1:2715695	G	A	Substitution	AAEL000004	AAEL000004-RA	UGT	glycosyltransferase	SYNONYMOUS_CODING	972	145	P>P		0.87549	0.89636	0.88592	-	-	-		0	173	ref		0	193	ref		0	196	ref		0	161	ref		2.72109	147	ref		4.29448	163	ref		10.0559	179	A/G		7.06714	283
supercont1.1:2715701	A	G	Substitution	AAEL000004	AAEL000004-RA	UGT	glycosyltransferase	SYNONYMOUS_CODING	966	143	Y>Y		0.89554	0.90008	0.89703	-	-	-		4.84848	165	ref		26.7327	202	A/G		30	200	A/G		0	162	ref		14.2857	154	ref		18.0723	166	A/G		16.4773	176	A/G		17.3285	277
supercont1.1:2715725	T	C	Substitution	AAEL000004	AAEL000004-RA	UGT	glycosyltransferase	SYNONYMOUS_CODING	942	135	S>S		0.89524	0.90242	0.89691	-	-	-		6.49351	154	ref		32.2581	186	C/T		29	200	C/T		0	145	ref		16.4179	134	ref		21.519	158	C/T		25.3012	166	C/T		22.3881	268
supercont1.1:2715801	G	A	Substitution	AAEL000004	AAEL000004-RA	UGT	glycosyltransferase	NON_SYNONYMOUS_CODING	866	110	S>F		0.85521	0.88226	0.71352	-	-	-		0	172	ref		0	170	ref		0	191	ref		0	135	ref		0	165	ref		0	185	ref		0	178	ref		0.357143	280
supercont1.1:2715842	C	T	Substitution	AAEL000004	AAEL000004-RA	UGT	glycosyltransferase	SYNONYMOUS_CODING	825	96	S>S		0.86858	0.89383	0.86779	-	-	-		0	153	ref		0	152	ref		0	188	ref		0	137	ref		1.80723	166	ref		6.49351	154	ref		8.75	160	C/T		6.43939	264
supercont1.1:2715923	C	T	Substitution	AAEL000004	AAEL000004-RA	UGT	glycosyltransferase	SYNONYMOUS_CODING	744	69	L>L		0.89632	0.89866	0.89957	-	-	-		6.97674	129	ref		26.2821	156	C/T		26.0116	173	C/T		0	125	ref		12.5	128	ref		24.6479	142	C/T		19.3277	119	C/T		12.4402	209
supercont1.1:2715935	A	G	Substitution	AAEL000004	AAEL000004-RA	UGT	glycosyltransferase	SYNONYMOUS_CODING	732	65	G>G		0.8667	0.88262	0.88056	-	-	-		15.4545	110	ref		8.78378	148	A/G		3.77358	159	ref		0	120	ref		0	125	ref		0	136	ref		0	124	ref		0	204
supercont1.1:2715962	A	G	Substitution	AAEL000004	AAEL000004-RA	UGT	glycosyltransferase	SYNONYMOUS_CODING	705	56	S>S		0.89348	0.8712	0.87478	-	-	-		7.03125	128	ref		25.3425	146	A/G		28.4615	130	A/G		0	110	ref		0	128	ref		0	129	ref		0	127	ref		0	176
supercont1.1:2715965	T	G	Substitution	AAEL000004	AAEL000004-RA	UGT	glycosyltransferase	SYNONYMOUS_CODING	702	55	R>R		0.89647	0.90036	0.90043	-	-	-		8.52713	129	ref		23.9726	146	G/T		28.6885	122	G/T		0	106	ref		16.129	124	ref		26.9231	130	G/T		29.3651	126	G/T		30.7692	169
supercont1.1:2718123	C	A	Substitution	AAEL000004	AAEL000004-RA	UGT	glycosyltransferase	INTRONIC					0.88567	0.87186	0.87341	-	-	-		27.5	40	ref		19.6429	56	A/C		29.6296	54	A/C		0	54	ref		0	54	ref		0	38	ref		0	58	ref		0	86
supercont1.1:2718195	G	A	Substitution	AAEL000004	AAEL000004-RA	UGT	glycosyltransferase	SYNONYMOUS_CODING	612	25	V>V		0.87838	0.90154	0.89513	-	-	-		26.1364	88	ref		23	100	A/G		22.5225	111	A/G		0	77	ref		19.7674	86	ref		32.0988	81	A/G		27.027	111	A/G		23.6486	148
supercont1.1:2718380	C	A	Substitution	AAEL000004	AAEL000004-RA	UGT	glycosyltransferase	5PRIME_UTR	427				0.88214	0.86494	0.876	-	-	-		0	113	ref		0	116	ref		0	84	ref		0	107	ref		0	101	ref		0	87	ref		18.9394	132	A/C		18.0645	155
supercont1.1:2718389	G	GT	Insertion	AAEL000004	AAEL000004-RA	UGT	glycosyltransferase	5PRIME_UTR	417				na	na	na	-	na	-		6.86275	102	ref		21.4953	107	G/GT		12.7907	86	G/GT		0	103	ref		9.61538	104	ref		13.3333	90	G/GT		15.4472	123	G/GT		12.6667	150
supercont1.1:2718403	AC	A	Deletion	AAEL000004	AAEL000004-RA	UGT	glycosyltransferase	5PRIME_UTR	403				na	na	na	-	na	-		0	108	ref		0	106	A/C		0	76	A/C		0	107	ref		10.1695	118	ref		8.75	80	ref		10.2564	117	A/AC		7.0922	141
supercont1.1:2718404	C	A	Substitution	AAEL000004	AAEL000004-RA	UGT	glycosyltransferase	5PRIME_UTR	403				0.89372	0.85102	0.86201	-	-	-		3.7037	108	ref		20.7547	106	A/C		11.8421	76	A/C		0	107	ref		0.847458	118	ref		1.25	80	ref		0.854701	117	A/AC		0.70922	141
supercont1.1:2718423	G	A	Substitution	AAEL000004	AAEL000004-RA	UGT	glycosyltransferase	5PRIME_UTR	384				0.89589	0.89577	0.90446	-	-	-		13.1579	114	ref		34.3434	99	A/G		34.1463	82	A/G		1.02041	98	ref		0	109	ref		0	85	ref		10.9091	110	A/G		7.04225	142
supercont1.1:2718458	C	A	Substitution	AAEL000004	AAEL000004-RA	UGT	glycosyltransferase	5PRIME_UTR	349				0.83763	0.89522	0.89894	-	-	-		0	134	ref		0	124	ref		0	106	ref		0	134	ref		2.65487	113	ref		9.90099	101	A/C		5.7377	122	ref		6.0241	166
supercont1.1:2718463	A	G	Substitution	AAEL000004	AAEL000004-RA	UGT	glycosyltransferase	5PRIME_UTR	344				0.85087	0.86782	0.8816	-	-	-		16.7883	137	ref		12.5984	127	A/G		18.1034	116	A/G		0	141	ref		0	116	ref		0	96	ref		0.75188	133	ref		0	172
supercont1.1:2718545	C	T	Substitution	AAEL000004	AAEL000004-RA	UGT	glycosyltransferase	5PRIME_UTR	262				0.85521	0.90085	0.90239	-	-	-		0	150	ref		0	189	ref		0	161	ref		0	157	ref		20	175	ref		17.1429	140	C/T		22.5434	173	C/T		23.4483	290
supercont1.1:2718605	TTC	T	Deletion	AAEL000004	AAEL000004-RA	UGT	glycosyltransferase	5PRIME_UTR	200				na	na	na	-	na	-		16.6667	138	ref		15.6757	185	T/TTC		21.2766	141	T/TTC		0	132	ref		0	136	ref		0	145	ref		0	164	ref		0	268
supercont1.1:2718609	C	T	Substitution	AAEL000004	AAEL000004-RA	UGT	glycosyltransferase	5PRIME_UTR	198				0.88278	0.90338	0.73984	-	-	-		19.3939	165	ref		64.3617	188	C/T		68	150	C/T		0	153	ref		18.3007	153	ref		17.8082	146	C/T		27.8107	169	C/T		26.2774	274
supercont1.1:2718676	C	T	Substitution	AAEL000004	AAEL000004-RA	UGT	glycosyltransferase	5PRIME_UTR	131				0.86207	0.90323	0.90167	-	-	-		0	128	ref		0	166	ref		0	146	ref		0	128	ref		19.2857	140	ref		16.5138	109	C/T		19.2593	135	C/T		23.9496	238
supercont1.10:944414	C	A	Substitution	AAEL000559	AAEL000559-RA	UGT	glycosyltransferase	NON_SYNONYMOUS_CODING	9	2	P>T		0.89632	0.89017	0.86779	-	-	-		9.30232	43	ref		39.3939	33	A/C		56.6667	30	A/C		0	49	ref		0	50	ref		0	55	ref		0	53	ref		0	63
supercont1.10:944433	T	C	Substitution	AAEL000559	AAEL000559-RA	UGT	glycosyltransferase	NON_SYNONYMOUS_CODING	28	8	F>S		0.89294	0.89383	0.89785	StGe	-	-		29.8246	57	ref		51.8519	54	overlap		62.5	48	C/T		0	58	ref		62.1212	66	C/T		60.6061	66	C/T		50	60	C/T		42.5	80
supercont1.10:944442	G	A	Substitution	AAEL000559	AAEL000559-RA	UGT	glycosyltransferase	NON_SYNONYMOUS_CODING	37	11	R>Q		0.87978	0.87314	0.90009	-	-	-		0	62	ref		0	63	ref		0	58	ref		0	68	ref		0	72	ref		0	68	ref		0	69	ref		0	92
supercont1.10:944495	A	T	Substitution	AAEL000559	AAEL000559-RA	UGT	glycosyltransferase	NON_SYNONYMOUS_CODING	90	29	N>Y		0.87199	0.88935	0.89851	-	-	-		0	72	ref		0	77	ref		0	76	ref		0	74	ref		6.57895	76	ref		10.7692	65	A/T		2.40964	83	ref		6.93069	101
supercont1.10:944579	G	A	Substitution	AAEL000559	AAEL000559-RA	UGT	glycosyltransferase	NON_SYNONYMOUS_CODING	174	57	E>K		0.71444	0.90472	0.88516	-	-	-		0	73	ref		0	71	ref		0	55	ref		0	76	ref		30.4348	46	ref		29.5455	44	A/G		14	50	A/G		15.942	69
supercont1.10:944591	A	T	Substitution	AAEL000559	AAEL000559-RA	UGT	glycosyltransferase	NON_SYNONYMOUS_CODING	186	61	R>W		0.89494	0.89577	0.89725	Cayn	-	-		50.7246	69	A/T		82.6087	69	A/T		77.0833	48	A/T		0	71	ref		51.0638	47	A/T		35.8491	53	A/T		21.8182	55	A/T		22.7848	79
supercont1.10:944616	G	GA	Insertion	AAEL000559	AAEL000559-RA	UGT	glycosyltransferase	FRAMESHIFT_CODING	211				na	na	na	-	na	-		36.9231	65	G/GA		67.7419	62	G/GA		68.6275	51	G/GA		0	66	ref		57.1429	70	G/GA		52.2388	67	G/GA		35.4839	62	G/GA		36.6667	90
supercont1.10:944637	A	T	Substitution	AAEL000559	AAEL000559-RA	UGT	glycosyltransferase	NON_SYNONYMOUS_CODING	232	76	N>I		0.89396	0.85836	0.89753	-	-	-		7.46269	67	ref		25	64	A/T		29.3103	58	A/T		0	63	ref		0	77	ref		0	76	ref		0	80	ref		0	95
supercont1.10:944650	T	G	Substitution	AAEL000559	AAEL000559-RA	UGT	glycosyltransferase	SYNONYMOUS_CODING	245	80	V>V		0.75692	0.88968	0.85348	Lab; Cayn; StGe	-	-		43.0556	72	G/T		89.6552	58	G/T		79.5918	49	G/T		0	65	ref		64.4737	76	G/T		58.4615	65	G/T		48.718	78	G/T		42.8571	91
supercont1.10:944654	C	T	Substitution	AAEL000559	AAEL000559-RA	UGT	glycosyltransferase	NON_SYNONYMOUS_CODING	249	82	L>F		0.89443	0.87729	0.88853	-	-	-		33.8235	68	C/T		63.9344	61	C/T		51.9231	52	C/T		0	59	ref		0	72	ref		0	63	ref		0	81	ref		0	91
supercont1.10:944720	A	G	Substitution	AAEL000559	AAEL000559-RA	UGT	glycosyltransferase	INTRONIC					0.89232	0.87969	0.89479	-	-	-		5.66038	53	ref		25	44	A/G		17.6471	51	A/G		0	50	ref		68	50	A/G		70.8333	48	A/G		44.0678	59	A/G		42.5	80
supercont1.10:944895	T	C	Substitution	AAEL000559	AAEL000559-RA	UGT	glycosyltransferase	SYNONYMOUS_CODING	422	139	D>D		0.86207	0.8907	0.90105	-	-	-		0	118	ref		0	125	ref		0	99	ref		0	97	ref		4.46429	112	ref		2.17391	92	ref		0.892857	112	ref		0.645161	155
supercont1.10:944994	C	A	Substitution	AAEL000559	AAEL000559-RA	UGT	glycosyltransferase	SYNONYMOUS_CODING	521	172	G>G		0.87783	0.81004	0.88883	-	-	-		4.69799	149	ref		0	159	ref		0	165	ref		0	159	ref		67.4797	123	A/C		65.3226	124	A/C		36.5079	126	A/C		48.6957	230
supercont1.10:944997	C	A	Substitution	AAEL000559	AAEL000559-RA	UGT	glycosyltransferase	SYNONYMOUS_CODING	524	173	I>I		0.74618	0.78023	0.82954	-	-	-		0	161	ref		0	153	ref		0	165	ref		0	152	ref		68.2171	129	A/C		66.1654	133	A/C		38.2812	128	A/C		48.5106	235
supercont1.10:945018	T	A	Substitution	AAEL000559	AAEL000559-RA	UGT	glycosyltransferase	SYNONYMOUS_CODING	545	180	G>G		0.88248	0.7655	0.90421	-	-	-		53.7415	147	A/T		91.358	162	A/T		88.1081	185	A/T		0	123	ref		74.1936	124	A/T		70.3226	155	A/T		37.3333	150	A/T		46.7742	248
supercont1.10:945027	G	A	Substitution	AAEL000559	AAEL000559-RA	UGT	glycosyltransferase	SYNONYMOUS_CODING	554	183	E>E		0.4999	0.83562	0.90032	-	-	-		46.9136	162	A/G		89.8204	167	A/G		88.0682	176	A/G		0	170	ref		0	166	ref		0	157	ref		0	154	ref		0	253
supercont1.10:945087	C	T	Substitution	AAEL000559	AAEL000559-RA	UGT	glycosyltransferase	SYNONYMOUS_CODING	614	203	S>S		0.84415	0.89087	0.90159	-	-	-		0	207	ref		0	198	ref		0.518135	193	ref		0	204	ref		3.0303	165	ref		1.1976	167	ref		0.46729	214	ref		0.334448	299
supercont1.10:945107	T	A	Substitution	AAEL000559	AAEL000559-RA	UGT	glycosyltransferase	NON_SYNONYMOUS_CODING	634	210	F>Y		0.85813	0.9044	0.89479	-	-	-		45.8763	194	A/T		87.963	216	A/T		85.8639	191	A/T		1	200	ref		67.5325	154	A/T		75	160	A/T		43.8356	219	A/T		46.3333	300
supercont1.10:945120	C	T	Substitution	AAEL000559	AAEL000559-RA	UGT	glycosyltransferase	SYNONYMOUS_CODING	647	214	R>R		0.89396	0.84626	0.89861	-	-	-		2.6455	189	ref		31.0185	216	C/T		27.1357	199	C/T		0	213	ref		0	158	ref		0	166	ref		0	209	ref		0	299
supercont1.10:945141	G	A	Substitution	AAEL000559	AAEL000559-RA	UGT	glycosyltransferase	SYNONYMOUS_CODING	668	221	R>R		0.89222	0.85713	0.82582	-	-	-		1.65746	181	ref		28.6432	199	A/G		22.5989	177	A/G		1.41509	212	ref		0	168	ref		0	176	ref		0	186	ref		0	287
supercont1.10:945207	A	G	Substitution	AAEL000559	AAEL000559-RA	UGT	glycosyltransferase	SYNONYMOUS_CODING	734	243	L>L		0.8942	0.88179	0.90032	-	-	-		21.7391	115	ref		62.2951	61	A/G		67.8571	56	A/G		0.574713	174	ref		0	157	ref		0	162	ref		0	173	ref		0	258
supercont1.10:945216	G	A	Substitution	AAEL000559	AAEL000559-RA	UGT	glycosyltransferase	SYNONYMOUS_CODING	743	246	Q>Q		0.85238	0.8854	0.89989	-	-	-		18.8679	106	ref		69.0141	71	A/G		69.6429	56	A/G		0.613497	163	ref		0.636943	157	ref		0.645161	155	ref		0	171	ref		0	242
supercont1.10:945222	C	T	Substitution	AAEL000559	AAEL000559-RA	UGT	glycosyltransferase	SYNONYMOUS_CODING	749	248	D>D		0.89739	0.88861	0.89138	-	-	-		20.1754	114	ref		46.8354	79	C/T		51.5625	64	C/T		0	165	ref		1.23457	162	ref		0	155	ref		0	169	ref		0	232
supercont1.10:945303	T	G	Substitution	AAEL000559	AAEL000559-RA	UGT	glycosyltransferase	SYNONYMOUS_CODING	830	275	T>T		0.89396	0.75807	0.87006	-	-	-		46.2025	158	G/T		81.4103	156	G/T		83.8926	149	G/T		0	181	ref		71.8121	149	G/T		69.0909	165	G/T		32.8467	137	G/T		50.2304	217
supercont1.10:945312	A	T	Substitution	AAEL000559	AAEL000559-RA	UGT	glycosyltransferase	SYNONYMOUS_CODING	839	278	P>P		0.89017	0.88643	0.87139	-	-	-		36.9697	165	A/T		49.3421	152	A/T		53.4162	161	A/T		0	190	ref		0	162	ref		0	152	ref		0	131	ref		0	212
supercont1.10:945354	C	G	Substitution	AAEL000559	AAEL000559-RA	UGT	glycosyltransferase	SYNONYMOUS_CODING	881	292	V>V		0.83763	0.88179	0.89248	-	-	-		0	139	ref		0	146	ref		0	149	ref		0	178	ref		57.5472	106	C/G		55.6522	115	C/G		26.7241	116	C/G		33.1395	172
supercont1.10:945375	C	T	Substitution	AAEL000559	AAEL000559-RA	UGT	glycosyltransferase	SYNONYMOUS_CODING	902	299	A>A		0.89767	0.84626	0.86779	-	-	-		24.812	133	ref		52.6718	131	C/T		41.7323	127	C/T		0	174	ref		0	80	ref		0	80	ref		0	108	ref		0	156
supercont1.10:945390	C	T	Substitution	AAEL000559	AAEL000559-RA	UGT	glycosyltransferase	SYNONYMOUS_CODING	917	304	N>N		0.86207	0.90008	0.89735	-	-	-		0	131	ref		0	124	ref		0	109	ref		0	178	ref		36.0656	61	C/T		33.7838	74	C/T		11.1111	99	C/T		13.5135	148
supercont1.10:945402	T	A	Substitution	AAEL000559	AAEL000559-RA	UGT	glycosyltransferase	SYNONYMOUS_CODING	929	308	T>T		0.89281	0.89725	0.81246	-	-	-		0	126	ref		0	109	diff		0	103	diff		0	167	ref		14.5833	48	ref		15.6863	51	A/T		3.33333	90	ref		5.34351	131
supercont1.10:945402	T	G	Substitution	AAEL000559	AAEL000559-RA	UGT	glycosyltransferase	SYNONYMOUS_CODING	929	308	T>T		0.89281	0.89725	0.81246	-	-	-		15.0794	126	ref		35.7798	109	G/T		33.0097	103	G/T		0	167	ref		0	48	ref		0	51	diff		0	90	ref		0.763359	131
supercont1.10:945408	T	C	Substitution	AAEL000559	AAEL000559-RA	UGT	glycosyltransferase	SYNONYMOUS_CODING	935	310	I>I		0.88707	0.89498	0.88909	-	-	-		14.4	125	ref		32.7273	110	C/T		29.4118	102	C/T		0	165	ref		2.38095	42	ref		2.5641	39	ref		0	88	ref		2.38095	126
supercont1.10:945468	T	C	Substitution	AAEL000559	AAEL000559-RA	UGT	glycosyltransferase	SYNONYMOUS_CODING	995	330	D>D		0.85669	0.90145	0.66137	-	-	-		0	83	ref		0	88	ref		0	68	ref		0	141	ref		16.9811	53	ref		19.5122	41	C/T		5.20833	96	ref		8.84956	113
supercont1.10:945474	G	T	Substitution	AAEL000559	AAEL000559-RA	UGT	glycosyltransferase	SYNONYMOUS_CODING	1001	332	V>V		0.85238	0.90209	0.8772	-	-	-		5.61798	89	ref		4.30108	93	ref		6.75676	74	ref		0	142	ref		27.1186	59	ref		25.5814	43	G/T		9.18367	98	G/T		12.931	116
supercont1.10:945504	C	T	Substitution	AAEL000559	AAEL000559-RA	UGT	glycosyltransferase	SYNONYMOUS_CODING	1031	342	H>H		0.55555	0.89881	0.89703	Lab	-	-		23.7624	101	ref		77.381	84	C/T		59.7222	72	C/T		0	136	ref		43.1373	102	C/T		60.2941	68	C/T		33.3333	117	C/T		28.3133	166
supercont1.10:945507	A	T	Substitution	AAEL000559	AAEL000559-RA	UGT	glycosyltransferase	SYNONYMOUS_CODING	1034	343	I>I		0.88248	0.86985	0.89376	-	-	-		15.8879	107	ref		24.0964	83	A/T		26.3158	76	A/T		0	137	ref		0.970874	103	ref		0	71	ref		0	121	ref		0.595238	168
supercont1.10:945513	T	G	Substitution	AAEL000559	AAEL000559-RA	UGT	glycosyltransferase	SYNONYMOUS_CODING	1040	345	S>S		0.87041	0.84353	0.89948	Lab	-	-		8.03571	112	ref		52.2222	90	G/T		33.75	80	G/T		0	127	ref		0	105	ref		0	76	ref		0	126	ref		0	179
supercont1.10:945552	C	T	Substitution	AAEL000559	AAEL000559-RA	UGT	glycosyltransferase	SYNONYMOUS_CODING	1079	358	P>P		0.19059	0.84772	0.90545	Lab	-	-		29.771	131	C/T		84.1121	107	C/T		77.2277	101	C/T		0	138	ref		0.847458	118	diff		0	110	diff		0	143	diff		0.518135	193
supercont1.10:945552	C	G	Substitution	AAEL000559	AAEL000559-RA	UGT	glycosyltransferase	SYNONYMOUS_CODING	1079	358	P>P		0.19059	0.84772	0.90545	StGe	-	-		0	131	diff		0	107	diff		0	101	diff		0	138	ref		58.4746	118	C/G		74.5455	110	C/G		44.7552	143	C/G		38.342	193
supercont1.10:945564	A	G	Substitution	AAEL000559	AAEL000559-RA	UGT	glycosyltransferase	SYNONYMOUS_CODING	1091	362	V>V		0.55962	0.87613	0.88516	Lab	-	-		34.5588	136	A/G		85.7143	112	A/G		73.2759	116	A/G		0	144	ref		62.2951	122	A/G		70.4	125	A/G		40.458	131	A/G		41.7112	187
supercont1.10:945591	G	A	Substitution	AAEL000559	AAEL000559-RA	UGT	glycosyltransferase	SYNONYMOUS_CODING	1118	371	L>L		0.89765	0.86352	0.89785	-	-	-		5.7554	139	ref		28.5714	140	A/G		28.0822	146	A/G		0	141	ref		0	127	ref		0	125	ref		0	131	ref		0	197
supercont1.10:945615	A	T	Substitution	AAEL000559	AAEL000559-RA	UGT	glycosyltransferase	SYNONYMOUS_CODING	1142	379	V>V		0.76078	0.83071	0.80928	-	-	-		0	148	ref		0	177	ref		0	155	ref		0	171	ref		64.2857	140	A/T		68.5039	127	A/T		47.9167	144	A/T		46.087	230
supercont1.10:945684	G	A	Substitution	AAEL000559	AAEL000559-RA	UGT	glycosyltransferase	SYNONYMOUS_CODING	1211	402	L>L		0.89163	0.88823	0.89513	-	-	-		42.6667	150	A/G		57.8035	173	A/G		58.7571	177	A/G		0	175	ref		2.7972	143	ref		0.689655	145	ref		0.520833	192	ref		0.896861	223
supercont1.10:945696	G	A	Substitution	AAEL000559	AAEL000559-RA	UGT	glycosyltransferase	SYNONYMOUS_CODING	1223	406	L>L		0.69323	0.85957	0.8557	-	-	-		0	150	ref		0	169	ref		0	161	ref		0	174	ref		61.1111	126	A/G		61.5385	130	A/G		34.9462	186	A/G		48.3568	213
supercont1.10:945711	G	T	Substitution	AAEL000559	AAEL000559-RA	UGT	glycosyltransferase	SYNONYMOUS_CODING	1238	411	A>A		0.89396	0.85783	0.90247	-	-	-		2.14286	140	ref		27.1523	151	G/T		16.0494	162	G/T		0	163	ref		0	111	ref		0	110	ref		0	174	ref		0	198
supercont1.10:945714	A	G	Substitution	AAEL000559	AAEL000559-RA	UGT	glycosyltransferase	SYNONYMOUS_CODING	1241	412	L>L		0.89147	0.84133	0.79181	Cayn	-	-		2.25564	133	ref		25.8503	147	A/G		14.8148	162	A/G		0	154	ref		62.1622	111	A/G		54.2056	107	A/G		32.5581	172	A/G		45.4082	196
supercont1.10:945777	G	A	Substitution	AAEL000559	AAEL000559-RA	UGT	glycosyltransferase	SYNONYMOUS_CODING	1304	433	V>V		0.87126	0.87186	0.89398	-	-	-		0	134	ref		0	104	ref		0	142	ref		0	161	ref		0	43	ref		0	58	ref		0	87	ref		0	142
supercont1.10:945807	G	A	Substitution	AAEL000559	AAEL000559-RA	UGT	glycosyltransferase	SYNONYMOUS_CODING	1334	443	L>L		0.88521	0.87675	0.89679	-	-	-		0	121	ref		0	107	ref		0	137	ref		0	168	ref		0	45	ref		0	50	ref		0	76	ref		0	139
supercont1.10:963613	A	G	Substitution	AAEL000559	AAEL000559-RA	UGT	glycosyltransferase	NON_SYNONYMOUS_CODING	1614	537	N>D		0.89514	0.90251	0.89467	-	-	-		38.806	67	A/G		75.4098	61	A/G		77.6119	67	A/G		82	50	G		42.5	40	A/G		34.2105	38	A/G		21.3115	61	A/G		20	110
supercont1.10:963645	C	T	Substitution	AAEL000559	AAEL000559-RA	UGT	glycosyltransferase	SYNONYMOUS_CODING	1646	547	R>R		0.89454	0.89118	0.89712	-	-	-		36.25	80	C/T		76.2712	59	C/T		72.6027	73	C/T		70.2128	47	C/T		0	61	ref		0	65	ref		1.04167	96	ref		0.684932	146
supercont1.10:963651	A	G	Substitution	AAEL000559	AAEL000559-RA	UGT	glycosyltransferase	SYNONYMOUS_CODING	1652	549	S>S		0.89306	0.82887	0.8984	-	-	-		43.0233	86	A/G		78.9474	57	A/G		73.3333	75	A/G		74.5455	55	A/G		0	71	ref		0	69	ref		0	95	ref		0.636943	157
supercont1.10:963663	C	T	Substitution	AAEL000559	AAEL000559-RA	UGT	glycosyltransferase	SYNONYMOUS_CODING	1664	553	F>F		0.8885	0.85836	0.88797	-	-	-		0	77	ref		0	58	ref		0	78	ref		77.3585	53	C/T		0	75	ref		0	88	ref		0	100	ref		1.18343	169
supercont1.10:963672	G	A	Substitution	AAEL000559	AAEL000559-RA	UGT	glycosyltransferase	SYNONYMOUS_CODING	1673	556	K>K		0.79693	0.84178	0.79755	StGe	-	-		0	90	ref		0	60	ref		0	81	ref		0	70	ref		66.6667	90	A/G		67.4157	89	A/G		50	100	A/G		44.5087	173
supercont1.10:963700	A	G	Substitution	AAEL000559	AAEL000559-RA	UGT	glycosyltransferase	NON_SYNONYMOUS_CODING	1701	566	I>V		0.89524	0.88897	0.88113	-	-	-		38.0435	92	A/G		73.913	69	A/G		78.2609	69	A/G		0	69	ref		0	86	ref		0	90	ref		0	103	ref		0	150
supercont1.10:963710	T	C	Substitution	AAEL000559	AAEL000559-RA	UGT	glycosyltransferase	NON_SYNONYMOUS_CODING	1711	569	I>T		0.7529	0.87186	0.72856	-	-	-		0	94	ref		0	73	ref		0	69	ref		0	70	ref		62.5	88	C/T		65.4762	84	C/T		48.5149	101	C/T		44	150
supercont1.10:963740	C	T	Substitution	AAEL000559	AAEL000559-RA	UGT	glycosyltransferase	3PRIME_UTR	1741				0.89524	0.86633	0.89387	-	-	-		4.87805	82	ref		30.6818	88	C/T		14.0625	64	C/T		0	62	ref		0	94	ref		0	70	ref		0	98	ref		0	141
supercont1.10:963754	T	G	Substitution	AAEL000559	AAEL000559-RA	UGT	glycosyltransferase	3PRIME_UTR	1755				0.89408	0.89226	0.90065	-	-	-		25.5814	86	ref		43.2432	74	G/T		50.8197	61	G/T		79.1667	48	G		3.44828	87	ref		1.75439	57	ref		0	93	ref		0	129
supercont1.10:963773	A	C	Substitution	AAEL000559	AAEL000559-RA	UGT	glycosyltransferase	3PRIME_UTR	1774				0.89514	0.89906	0.89376	-	-	-		20	75	ref		39.0625	64	A/C		36.5079	63	A/C		61.1111	36	A/C		4.16667	72	ref		0	45	ref		0	91	ref		0	114
supercont1.10:963776	T	C	Substitution	AAEL000559	AAEL000559-RA	UGT	glycosyltransferase	3PRIME_UTR	1777				0.89017	0.88262	0.87779	-	-	-		19.1781	73	ref		34.4828	58	C/T		36.0656	61	C/T		55.5556	36	C/T		44.1176	68	C/T		50	40	C/T		24.1758	91	C/T		19.6429	112
supercont1.10:963791	G	A	Substitution	AAEL000559	AAEL000559-RA	UGT	glycosyltransferase	3PRIME_UTR	1792				0.87126	0.8985	0.74948	-	-	-		0	81	ref		0	54	ref		2.04082	49	ref		0	26	lc		22.6667	75	ref		35.7143	56	A/G		14	100	A/G		19.1667	120
supercont1.10:963834	A	T	Substitution	AAEL000559	AAEL000559-RA	UGT	glycosyltransferase	3PRIME_UTR	1835				0.74618	0.89145	0.79684	-	-	-		0	62	ref		0	41	ref		0	41	ref		0	20	lc		54.2857	70	A/T		49.2958	71	A/T		26.4706	102	A/T		33.3333	120
supercont1.10:963856	T	A	Substitution	AAEL000559	AAEL000559-RA	UGT	glycosyltransferase	3PRIME_UTR	1857				0.88278	0.87779	0.892	-	-	-		12.0482	83	ref		18.5714	70	A/T		25	52	A/T		0	13	lc		1.33333	75	ref		0	75	ref		0	100	ref		0.763359	131
supercont1.10:963875	T	A	Substitution	AAEL000559	AAEL000559-RA	UGT	glycosyltransferase	3PRIME_UTR	1876				0.79974	0.90154	0.8654	-	-	-		0	84	ref		0	75	ref		0	62	ref		0	14	lc		49.2958	71	A/T		53.3333	75	A/T		30.3371	89	A/T		39.8374	123
supercont1.10:963887	C	A	Substitution	AAEL000559	AAEL000559-RA	UGT	glycosyltransferase	3PRIME_UTR	1888				0.2908	0.89967	0.88439	-	-	-		29.8851	87	A/C		87.3418	79	A/C		85.2941	68	A/C		0	15	lc		53.0121	83	A/C		52.381	84	A/C		32.1839	87	A/C		41.0072	139
supercont1.10:963890	T	C	Substitution	AAEL000559	AAEL000559-RA	UGT	glycosyltransferase	3PRIME_UTR	1891				0.8492	0.90189	0.84145	-	-	-		0	92	ref		0	80	ref		0	68	ref		0	15	lc		48.7805	82	C/T		55.5556	90	C/T		29.6703	91	C/T		38.5185	135
supercont1.10:963920	A	G	Substitution	AAEL000559	AAEL000559-RA	UGT	glycosyltransferase	3PRIME_UTR	1921				0.89624	0.89511	0.88766	-	-	-		14.2857	77	ref		35.1351	74	A/G		45	60	A/G		53.8462	26	lc		3.4188	117	ref		0	100	ref		1.06383	94	ref		0.729927	137
supercont1.10:963931	G	C	Substitution	AAEL000559	AAEL000559-RA	UGT	glycosyltransferase	3PRIME_UTR	1932				0.89258	0.88141	0.89218	-	-	-		14.2857	63	ref		34.4828	58	C/G		41.5094	53	C/G		0	39	ref		0	112	ref		0	93	ref		0	89	ref		0	130
supercont1.10:963936	A	T	Substitution	AAEL000559	AAEL000559-RA	UGT	glycosyltransferase	3PRIME_UTR	1937				0.86959	0.89649	0.88439	-	-	-		0	64	ref		0	56	ref		0	51	ref		63.6364	44	A/T		0	121	ref		0	100	ref		0	88	ref		0	131
supercont1.10:963967	G	A	Substitution	AAEL000559	AAEL000559-RA	UGT	glycosyltransferase	3PRIME_UTR	1968				0.19629	0.90154	0.89873	Lab	-	-		16.0714	56	ref		81.25	48	A/G		50	32	A/G		83.871	62	A		69.8276	116	A/G		69.4118	85	A/G		39.759	83	A/G		42.2764	123
supercont1.10:963978	C	T	Substitution	AAEL000559	AAEL000559-RA	UGT	glycosyltransferase	3PRIME_UTR	1979				0.85521	0.87675	0.90228	-	-	-		0	59	ref		0	51	ref		0	31	ref		0	64	ref		63.2075	106	C/T		67.4157	89	C/T		41.1765	85	C/T		40.367	109
supercont1.10:963985	C	A	Substitution	AAEL000559	AAEL000559-RA	UGT	glycosyltransferase	3PRIME_UTR	1986				0.8921	0.88179	0.89351	-	-	-		7.27273	55	ref		16.9811	53	A/C		9.67742	31	ref		0	68	ref		0	101	ref		0	89	ref		0	86	ref		0	104
supercont1.1002:133960	T	C	Substitution	AAEL014080	AAEL014080-RA	Other detox	aldehyde dehydrogenase	5PRIME_UTR	41				0.88834	0.88643	0.88999	-	-	-		21.875	96	ref		17.9245	106	C/T		13.3333	90	C/T		0	53	ref		0	97	ref		0	93	ref		0	81	ref		0	145
supercont1.1002:134043	G	A	Substitution	AAEL014080	AAEL014080-RA	Other detox	aldehyde dehydrogenase	INTRONIC					0.87274	0.90132	0.86694	-	-	-		42.2535	71	A/G		45.9184	98	A/G		49.3507	77	A/G		0	30	ref		7.27273	55	ref		15.5556	45	A/G		25	52	A/G		39.7436	78
supercont1.1002:175195	C	A	Substitution	AAEL014080	AAEL014080-RA	Other detox	aldehyde dehydrogenase	SPLICE_SITE					0.88248	0.88299	0.89081	-	-	-		0	33	ref		0	51	ref		0	41	ref		42.8571	35	A/C		31.25	32	ref		15.9091	44	A/C		10.2564	39	ref		14.4928	69
supercont1.1002:175235	C	T	Substitution	AAEL014080	AAEL014080-RA	Other detox	aldehyde dehydrogenase	SYNONYMOUS_CODING	138	24	S>S		0.6122	0.83111	0.90474	-	-	-		0	50	ref		0	59	ref		0	61	ref		32.6531	49	ref		43.75	48	C/T		32.3529	68	C/T		30	60	C/T		43.6782	87
supercont1.1002:175244	G	T	Substitution	AAEL014080	AAEL014080-RA	Other detox	aldehyde dehydrogenase	SYNONYMOUS_CODING	147	27	T>T		0.88498	0.86424	0.88113	-	-	-		26.6667	60	ref		39.0625	64	G/T		35.4839	62	G/T		0	49	ref		0	51	ref		0	72	ref		0	63	ref		0	98
supercont1.1002:175271	T	C	Substitution	AAEL014080	AAEL014080-RA	Other detox	aldehyde dehydrogenase	SYNONYMOUS_CODING	174	36	G>G		0.85953	0.88918	0.88592	-	-	-		18.4615	65	ref		16.6667	60	C/T		12.6761	71	C/T		0	49	ref		0	49	ref		0	69	ref		0	71	ref		0	108
supercont1.1002:175290	G	T	Substitution	AAEL014080	AAEL014080-RA	Other detox	aldehyde dehydrogenase	NON_SYNONYMOUS_CODING	193	43	A>S		0.89317	0.88015	0.86454	-	-	-		23.3333	60	ref		38.4615	52	G/T		37.1429	70	G/T		0	49	ref		0	47	ref		0	63	ref		0	58	ref		0	103
supercont1.1002:175334	A	C	Substitution	AAEL014080	AAEL014080-RA	Other detox	aldehyde dehydrogenase	SYNONYMOUS_CODING	237	57	A>A		0.87613	0.89435	0.87662	-	-	-		0	39	ref		0	37	ref		0	43	ref		0	36	ref		9.67742	31	ref		3.125	32	ref		2.85714	35	ref		17.5439	57
supercont1.1002:175337	G	A	Substitution	AAEL014080	AAEL014080-RA	Other detox	aldehyde dehydrogenase	SYNONYMOUS_CODING	240	58	K>K		0.8789	0.89621	0.87478	-	-	-		0	38	ref		0	36	ref		0	49	ref		0	33	ref		9.09091	33	ref		2.85714	35	ref		0	35	ref		15.5172	58
supercont1.1002:175398	C	T	Substitution	AAEL014080	AAEL014080-RA	Other detox	aldehyde dehydrogenase	SYNONYMOUS_CODING	301	79	L>L		0.7715	0.84391	0.89828	-	-	-		0	39	ref		0	50	ref		0	55	ref		36.5854	41	ref		43.75	32	C/T		32.6087	46	C/T		24.4444	45	C/T		41.1765	68
supercont1.1002:175415	T	C	Substitution	AAEL014080	AAEL014080-RA	Other detox	aldehyde dehydrogenase	SYNONYMOUS_CODING	318	84	D>D		0.89163	0.78137	0.89743	-	-	-		90	40	C		69.3878	49	C/T		72.2222	54	C/T		53.8462	39	C/T		43.75	32	C/T		39.1304	46	C/T		46.2963	54	C/T		27.3973	73
supercont1.1002:175436	C	T	Substitution	AAEL014080	AAEL014080-RA	Other detox	aldehyde dehydrogenase	SYNONYMOUS_CODING	339	91	N>N		0.88366	0.86562	0.87478	-	-	-		22.2222	36	ref		28	50	C/T		32.7586	58	C/T		0	33	ref		0	33	ref		0	44	ref		0	51	ref		0	86
supercont1.1002:175631	T	C	Substitution	AAEL014080	AAEL014080-RA	Other detox	aldehyde dehydrogenase	SYNONYMOUS_CODING	534	156	I>I		0.86858	0.89087	0.88999	-	-	-		0	32	ref		0	40	ref		0	36	ref		0	41	ref		4.34783	46	ref		2.7027	37	ref		5.76923	52	ref		10.7692	65
supercont1.1002:175646	G	A	Substitution	AAEL014080	AAEL014080-RA	Other detox	aldehyde dehydrogenase	SYNONYMOUS_CODING	549	161	P>P		0.88142	0.88897	0.88391	-	-	-		0	32	ref		5.55556	36	ref		13.1579	38	A/G		0	40	ref		0	44	ref		0	40	ref		0	51	ref		0	61
supercont1.1002:175700	G	T	Substitution	AAEL014080	AAEL014080-RA	Other detox	aldehyde dehydrogenase	SYNONYMOUS_CODING	603	179	L>L		0.82791	0.82817	0.89502	-	-	-		0	33	ref		0	39	ref		0	37	ref		38.8889	36	ref		28.5714	35	ref		23.6842	38	G/T		17.3913	46	G/T		13.7931	58
supercont1.1002:175736	A	G	Substitution	AAEL014080	AAEL014080-RA	Other detox	aldehyde dehydrogenase	SYNONYMOUS_CODING	639	191	A>A		0.88992	0.88262	0.89022	-	-	-		9.7561	41	ref		24.3902	41	A/G		33.3333	39	A/G		0	37	ref		0	32	ref		0	37	ref		0	51	ref		0	65
supercont1.1002:175766	T	A	Substitution	AAEL014080	AAEL014080-RA	Other detox	aldehyde dehydrogenase	SYNONYMOUS_CODING	669	201	A>A		0.89243	0.89293	0.90446	-	-	-		55.102	49	A/T		28.5714	49	A/T		49.0909	55	A/T		100	41	A		81.0811	37	A		62.2222	45	A/T		76.3636	55	A/T		62.5	80
supercont1.1002:175781	C	T	Substitution	AAEL014080	AAEL014080-RA	Other detox	aldehyde dehydrogenase	SYNONYMOUS_CODING	684	206	G>G		0.89243	0.88411	0.89081	-	-	-		10.8108	37	ref		30	50	C/T		36.0656	61	C/T		0	50	ref		0	38	ref		0	51	ref		0	66	ref		1.05263	95
supercont1.1002:175805	C	T	Substitution	AAEL014080	AAEL014080-RA	Other detox	aldehyde dehydrogenase	SYNONYMOUS_CODING	708	214	Y>Y		0.89554	0.81111	0.89631	-	-	-		53.4884	43	C/T		28.5714	49	C/T		38.4615	65	C/T		72.549	51	C/T		56.5217	46	C/T		48.2759	58	C/T		68.1818	66	C/T		54.0816	98
supercont1.1002:175844	G	A	Substitution	AAEL014080	AAEL014080-RA	Other detox	aldehyde dehydrogenase	SYNONYMOUS_CODING	747	227	E>E		0.86333	0.88475	0.89667	-	-	-		0	53	ref		0	44	ref		0	51	ref		0	53	ref		0	47	ref		0	69	ref		0	85	ref		0	124
supercont1.1002:175847	T	C	Substitution	AAEL014080	AAEL014080-RA	Other detox	aldehyde dehydrogenase	SYNONYMOUS_CODING	750	228	I>I		0.85087	0.69878	0.88628	-	-	-		10	60	ref		13.6364	44	C/T		19.6078	51	C/T		5.55556	54	ref		7.40741	54	ref		2.85714	70	ref		6.0241	83	ref		3.96825	126
supercont1.1002:175850	G	A	Substitution	AAEL014080	AAEL014080-RA	Other detox	aldehyde dehydrogenase	SYNONYMOUS_CODING	753	229	R>R		0.88978	0.68202	0.8934	-	-	-		3.63636	55	ref		14.2857	42	A/G		16.9811	53	A/G		3.7037	54	ref		5.55556	54	ref		2.98507	67	ref		4.87805	82	ref		3.93701	127
supercont1.1002:175862	T	C	Substitution	AAEL014080	AAEL014080-RA	Other detox	aldehyde dehydrogenase	SYNONYMOUS_CODING	765	233	F>F		0.88366	0.89447	0.89546	-	-	-		8.19672	61	ref		18.4211	38	C/T		18.3333	60	C/T		11.8644	59	ref		6.77966	59	ref		5	60	ref		0	85	ref		6.01504	133
supercont1.1002:175874	C	T	Substitution	AAEL014080	AAEL014080-RA	Other detox	aldehyde dehydrogenase	SYNONYMOUS_CODING	777	237	V>V		0.88308	0.87613	0.90105	-	-	-		18.1818	66	ref		20.8333	48	C/T		21.3115	61	C/T		14.9254	67	ref		7.93651	63	ref		7.57576	66	ref		1.20482	83	ref		5.59441	143
supercont1.1002:175932	T	C	Substitution	AAEL014080	AAEL014080-RA	Other detox	aldehyde dehydrogenase	SYNONYMOUS_CODING	835	257	L>L		0.89408	0.9044	0.89828	-	-	-		92.1053	76	C		65.3846	78	C/T		65.3061	98	C/T		98.9362	94	C		60.2941	68	C/T		58.9744	78	C/T		55.9524	84	C/T		44.7552	143
supercont1.1002:175943	C	T	Substitution	AAEL014080	AAEL014080-RA	Other detox	aldehyde dehydrogenase	SYNONYMOUS_CODING	846	260	G>G		0.73565	0.73405	0.89578	-	-	-		0	65	ref		0	81	ref		0	88	ref		35	80	C/T		21.2121	66	ref		24.359	78	C/T		25	88	C/T		25.5639	133
supercont1.1002:175967	T	C	Substitution	AAEL014080	AAEL014080-RA	Other detox	aldehyde dehydrogenase	SYNONYMOUS_CODING	870	268	F>F		0.89533	0.89636	0.89851	-	-	-		94.6429	56	C		64.1791	67	C/T		60.8696	69	C/T		98.718	78	C		78.5714	70	C		63.7681	69	C/T		70.3704	81	C/T		59.0164	122
supercont1.1002:175983	T	G	Substitution	AAEL014080	AAEL014080-RA	Other detox	aldehyde dehydrogenase	SPLICE_SITE					0.86959	0.89017	0.86694	-	-	-		8.47458	59	ref		14.0351	57	G/T		15.2542	59	G/T		0	78	ref		0	66	ref		0	58	ref		0	83	ref		0	101
supercont1.1002:175988	T	A	Substitution	AAEL014080	AAEL014080-RA	Other detox	aldehyde dehydrogenase	SPLICE_SITE					0.85813	0.88226	0.89712	-	-	-		0	40	ref		0	40	ref		0	49	ref		0	72	ref		3.57143	56	ref		5.35714	56	ref		6.41026	78	ref		13	100
supercont1.1002:176004	A	T	Substitution	AAEL014080	AAEL014080-RA	Other detox	aldehyde dehydrogenase	INTRONIC					0.65616	0.76158	0.90433	-	-	-		93.4783	46	T		45.2381	42	A/T		36.5854	41	A/T		60	75	A/T		50	56	A/T		50	48	A/T		52.8571	70	A/T		32.6087	92
supercont1.1002:176020	C	T	Substitution	AAEL014080	AAEL014080-RA	Other detox	aldehyde dehydrogenase	INTRONIC					0.47635	0.78674	0.90094	-	-	-		94.7369	38	T		43.5897	39	C/T		28.2051	39	C/T		53.9683	63	C/T		42.2222	45	C/T		56.5217	46	C/T		50.7692	65	C/T		36.9048	84
supercont1.1002:176068	T	C	Substitution	AAEL014080	AAEL014080-RA	Other detox	aldehyde dehydrogenase	SYNONYMOUS_CODING	906	280	A>A		0.85521	0.89774	0.89234	Lab	-	-		93.3333	45	C		47.9167	48	C/T		56.8627	51	C/T		98.3871	62	C		71.6418	67	C/T		73.6842	38	C/T		68.1818	66	C/T		65.9574	94
supercont1.1002:176146	T	C	Substitution	AAEL014080	AAEL014080-RA	Other detox	aldehyde dehydrogenase	SYNONYMOUS_CODING	984	306	D>D		0.89431	0.90323	0.89775	-	-	-		95.9184	49	C		65.2778	72	C/T		69.0909	55	C/T		98.5714	70	C		76.4706	51	C/T		75	48	C/T		60.7143	56	C/T		59.3023	86
supercont1.1002:176164	C	G	Substitution	AAEL014080	AAEL014080-RA	Other detox	aldehyde dehydrogenase	SYNONYMOUS_CODING	1002	312	A>A		0.8878	0.89577	0.87209	-	-	-		0	53	ref		0	78	ref		0	64	ref		0	70	ref		14.2857	56	ref		10.9091	55	ref		16.9492	59	C/G		24.7191	89
supercont1.1002:176181	C	A	Substitution	AAEL014080	AAEL014080-RA	Other detox	aldehyde dehydrogenase	NON_SYNONYMOUS_CODING	1019	318	A>D		0.89147	0.88968	0.88766	-	-	-		16	50	ref		36.6197	71	A/C		43.3333	60	A/C		0	59	ref		0	50	ref		0	60	ref		0	70	ref		0	88
supercont1.1002:176185	T	A	Substitution	AAEL014080	AAEL014080-RA	Other detox	aldehyde dehydrogenase	SYNONYMOUS_CODING	1023	319	R>R		0.89722	0.88823	0.81914	-	-	-		44.6808	47	A/T		14.2857	70	A/T		22.9508	61	A/T		41.6667	60	A/T		37.037	54	A/T		15.2542	59	A/T		17.3333	75	A/T		15.7895	95
supercont1.1002:176194	T	C	Substitution	AAEL014080	AAEL014080-RA	Other detox	aldehyde dehydrogenase	SYNONYMOUS_CODING	1032	322	G>G		0.89222	0.81696	0.90378	-	-	-		42.3077	52	C/T		18.0556	72	C/T		26.8657	67	C/T		55.3846	65	C/T		36.2069	58	C/T		44.6154	65	C/T		31.5068	73	C/T		25	100
supercont1.1002:176210	G	A	Substitution	AAEL014080	AAEL014080-RA	Other detox	aldehyde dehydrogenase	NON_SYNONYMOUS_CODING	1048	328	G>S		0.89396	0.86707	0.88056	-	-	-		20.3704	54	ref		41.1765	68	A/G		39.1304	69	A/G		0	69	ref		0	63	ref		0	65	ref		0	74	ref		0.877193	114
supercont1.1002:176224	T	C	Substitution	AAEL014080	AAEL014080-RA	Other detox	aldehyde dehydrogenase	SYNONYMOUS_CODING	1062	332	G>G		0.89443	0.83924	0.89735	-	-	-		46.6667	45	C/T		15.0685	73	C/T		28.7879	66	C/T		63.6364	66	C/T		33.3333	51	ref		46.7742	62	C/T		41.4634	82	C/T		23.2	125
supercont1.1002:176246	C	T	Substitution	AAEL014080	AAEL014080-RA	Other detox	aldehyde dehydrogenase	SYNONYMOUS_CODING	1084	340	L>L		0.89615	0.84574	0.90247	-	-	-		50	56	C/T		17.2414	87	C/T		33.8462	65	C/T		55.4217	83	C/T		28.3582	67	ref		50	74	C/T		40.7895	76	C/T		26.4286	140
supercont1.1002:176251	C	T	Substitution	AAEL014080	AAEL014080-RA	Other detox	aldehyde dehydrogenase	SYNONYMOUS_CODING	1089	341	N>N		0.8885	0.89043	0.86036	-	-	-		20	65	ref		32.6087	92	C/T		27.2727	66	C/T		0	89	ref		0	67	ref		0	76	ref		0	78	ref		0	145
supercont1.1002:176317	T	C	Substitution	AAEL014080	AAEL014080-RA	Other detox	aldehyde dehydrogenase	SYNONYMOUS_CODING	1155	363	R>R		0.89306	0.90199	0.90167	-	-	-		82.2222	45	C		42.1875	64	C/T		44.4444	54	C/T		100	55	C		75.4098	61	C/T		55.9524	84	C/T		58.1395	86	C/T		62.7586	145
supercont1.1002:176392	A	G	Substitution	AAEL014080	AAEL014080-RA	Other detox	aldehyde dehydrogenase	SYNONYMOUS_CODING	1230	388	E>E		0.8789	0.88015	0.9002	-	-	-		18.6046	43	ref		11.2903	62	A/G		15.2542	59	A/G		16.3934	61	ref		3.84615	78	ref		10.9589	73	A/G		13.4328	67	A/G		7.64706	170
supercont1.1002:176395	G	A	Substitution	AAEL014080	AAEL014080-RA	Other detox	aldehyde dehydrogenase	SYNONYMOUS_CODING	1233	389	E>E		0.89186	0.89944	0.88667	-	-	-		50	42	A/G		23.4375	64	A/G		21.875	64	A/G		0	56	ref		10.8108	74	ref		6.75676	74	ref		22.2222	72	A/G		16.9591	171
supercont1.1002:176435	C	T	Substitution	AAEL014080	AAEL014080-RA	Other detox	aldehyde dehydrogenase	SYNONYMOUS_CODING	1273	403	L>L		0.89281	0.89725	0.87276	-	-	-		51.1628	43	C/T		26.3889	72	C/T		23.6111	72	C/T		0	60	ref		11.2676	71	ref		8.86076	79	ref		13.5593	59	C/T		14.7651	149
supercont1.1002:176455	A	G	Substitution	AAEL014080	AAEL014080-RA	Other detox	aldehyde dehydrogenase	SYNONYMOUS_CODING	1293	409	R>R		0.86333	0.83071	0.89101	-	-	-		8.88889	45	ref		5.6338	71	ref		5.7971	69	ref		16.3265	49	ref		1.5873	63	ref		5.88235	68	ref		2	50	ref		7.53425	146
supercont1.1002:176458	C	A	Substitution	AAEL014080	AAEL014080-RA	Other detox	aldehyde dehydrogenase	SYNONYMOUS_CODING	1296	410	A>A		0.87783	0.83856	0.89502	-	-	-		4.87805	41	ref		4.34783	69	ref		1.53846	65	ref		14.2857	49	ref		1.53846	65	ref		4.41176	68	ref		1.96078	51	ref		5.47945	146
supercont1.1002:176503	T	C	Substitution	AAEL014080	AAEL014080-RA	Other detox	aldehyde dehydrogenase	SYNONYMOUS_CODING	1341	425	N>N		0.89431	0.89725	0.88552	-	-	-		66	50	C/T		35.9375	64	C/T		51.7647	85	C/T		0	32	ref		17.5	40	ref		14.2857	63	C/T		16.6667	48	C/T		19.2593	135
supercont1.1002:176542	T	A	Substitution	AAEL014080	AAEL014080-RA	Other detox	aldehyde dehydrogenase	SYNONYMOUS_CODING	1380	438	A>A		0.88101	0.87314	0.876	-	-	-		15	40	ref		9.80392	51	ref		22.0779	77	A/T		0	18	lc		0	31	ref		0	44	ref		0	42	ref		0	91
supercont1.1002:176588	G	A	Substitution	AAEL014080	AAEL014080-RA	Other detox	aldehyde dehydrogenase	INTRONIC					0.89348	0.90466	0.90188	-	-	-		81.579	38	A		57.8947	57	A/G		57.377	61	A/G		95.2381	42	A		46.8085	47	A/G		39.6552	58	A/G		50.9434	53	A/G		29.1139	79
supercont1.1002:176716	A	G	Substitution	AAEL014080	AAEL014080-RA	Other detox	aldehyde dehydrogenase	SYNONYMOUS_CODING	1485	473	E>E		0.89454	0.90132	0.90378	-	-	-		90.3846	104	G		72.6496	117	A/G		79.8611	144	A/G		100	110	G		77.2277	101	A/G		60.8	125	A/G		66.0714	112	A/G		63.0769	195
supercont1.1002:176731	C	A	Substitution	AAEL014080	AAEL014080-RA	Other detox	aldehyde dehydrogenase	SYNONYMOUS_CODING	1500	478	T>T		0.82791	0.82308	0.89851	-	-	-		2.67857	112	ref		0	120	ref		0	155	ref		62.037	108	A/C		36.5385	104	A/C		32.5397	126	A/C		30.9735	113	A/C		28.1553	206
supercont1.1002:176743	C	G	Substitution	AAEL014080	AAEL014080-RA	Other detox	aldehyde dehydrogenase	SYNONYMOUS_CODING	1512	482	T>T		0.89408	0.90421	0.90336	-	-	-		91.5888	107	G		70.1613	124	C/G		82.3171	164	C/G		100	113	G		77.7778	108	C/G		62.6984	126	C/G		62.1849	119	C/G		62.0192	208
supercont1.1002:176768	T	A	Substitution	AAEL014080	AAEL014080-RA	Other detox	aldehyde dehydrogenase	3PRIME_UTR	1537				0.74245	0.80518	0.9047	-	-	-		0	122	ref		0	136	ref		0	166	ref		35.5372	121	A/T		19.2308	104	ref		18.1102	127	A/T		14.1667	120	A/T		9.81308	214
supercont1.1002:176792	A	T	Substitution	AAEL014080	AAEL014080-RA	Other detox	aldehyde dehydrogenase	3PRIME_UTR	1561				0.66634	0.77638	0.89765	-	-	-		0	102	ref		0	138	ref		0	154	ref		32.3529	102	A/T		17.5926	108	ref		21.875	128	A/T		13.7615	109	A/T		9.09091	176
supercont1.1002:176807	A	G	Substitution	AAEL014080	AAEL014080-RA	Other detox	aldehyde dehydrogenase	3PRIME_UTR	1576				0.87549	0.82754	0.90487	-	-	-		21.875	96	ref		25.7812	128	A/G		28.169	142	A/G		65.6863	102	A/G		42.7083	96	A/G		35.7143	126	A/G		40	110	A/G		34.5912	159
supercont1.1002:176817	G	A	Substitution	AAEL014080	AAEL014080-RA	Other detox	aldehyde dehydrogenase	3PRIME_UTR	1586				0.69012	0.8269	0.88733	-	-	-		0	104	ref		0	131	ref		0	136	ref		32.381	105	A/G		25	92	ref		17.4603	126	A/G		12.6126	111	A/G		8.28402	169
supercont1.1002:176846	C	T	Substitution	AAEL014080	AAEL014080-RA	Other detox	aldehyde dehydrogenase	3PRIME_UTR	1615				0.79693	0.87779	0.88439	-	-	-		13.6364	110	ref		14.9606	127	C/T		11.6279	129	C/T		0	108	ref		0	106	ref		0	131	ref		0	111	ref		0	182
supercont1.1002:176849	C	T	Substitution	AAEL014080	AAEL014080-RA	Other detox	aldehyde dehydrogenase	3PRIME_UTR	1618				0.84769	0.86633	0.88552	-	-	-		27.2727	110	ref		26.8293	123	C/T		29.3651	126	C/T		0	106	ref		0	101	ref		0	128	ref		0	113	ref		0	186
supercont1.1002:176873	T	G	Substitution	AAEL014080	AAEL014080-RA	Other detox	aldehyde dehydrogenase	3PRIME_UTR	1642				0.79693	0.84722	0.90351	-	-	-		6.66667	120	ref		0	130	ref		0	136	ref		66.0194	103	G/T		41.7391	115	G/T		36.8	125	G/T		35.2941	119	G/T		37.0968	186
supercont1.1002:176923	C	T	Substitution	AAEL014080	AAEL014080-RA	Other detox	aldehyde dehydrogenase	3PRIME_UTR	1692				0.89739	0.89487	0.82582	-	-	-		44.5783	83	C/T		15.0442	113	C/T		34.2857	140	C/T		0	96	ref		8	100	ref		4.13223	121	ref		13.9535	129	C/T		14.966	147
supercont1.1002:176931	C	G	Substitution	AAEL014080	AAEL014080-RA	Other detox	aldehyde dehydrogenase	3PRIME_UTR	1700				0.87488	0.76158	0.8457	-	-	-		0	85	ref		0	105	ref		0	129	ref		25.5319	94	ref		19.802	101	ref		10.2564	117	C/G		13.0081	123	C/G		10.8108	148
supercont1.1002:176949	T	C	Substitution	AAEL014080	AAEL014080-RA	Other detox	aldehyde dehydrogenase	3PRIME_UTR	1718				0.89085	0.90323	0.90521	StGe	-	-		77.4648	71	C/T		54.7619	84	C/T		61.5385	104	C/T		100	99	C		68.9655	87	C/T		55.3398	103	C/T		58.3333	120	C/T		66.4286	140
supercont1.1003:84663	C	T	Substitution	AAEL014091	AAEL014091-RA	Red/Ox	Cu-Zn superoxide dismutase CUSOD1	NON_SYNONYMOUS_CODING	8	3	S>L		0.89232	0.87875	0.85781	-	-	-		68.2927	123	C/T		39.3701	127	C/T		28.0576	139	C/T		1.75439	114	ref		0	115	ref		0	112	ref		0	109	ref		0	187
supercont1.1003:84716	G	A	Substitution	AAEL014091	AAEL014091-RA	Red/Ox	Cu-Zn superoxide dismutase CUSOD1	NON_SYNONYMOUS_CODING	61	21	D>N		0.79693	0.88687	0.89479	Cayn	-	-		0	71	ref		0	94	ref		0	81	ref		74.1936	62	A/G		33.7838	74	A/G		51.5625	64	A/G		36.4865	74	A/G		25.8621	116
supercont1.1003:97134	T	C	Substitution	AAEL014091	AAEL014091-RA	Red/Ox	Cu-Zn superoxide dismutase CUSOD1	SYNONYMOUS_CODING	375	125	P>P		0.83763	0.8854	0.90125	-	-	-		100	71	C		100	92	C		100	102	C		100	55	C		100	66	C		100	54	C		100	84	C		100	133
supercont1.1003:97144	T	C	Substitution	AAEL014091	AAEL014091-RA	Red/Ox	Cu-Zn superoxide dismutase CUSOD1	SYNONYMOUS_CODING	385	129	L>L		0.88278	0.89001	0.84746	-	-	-		13.2353	68	ref		8.69565	92	ref		2.04082	98	ref		36.5385	52	C/T		20.5479	73	ref		22.9167	48	C/T		7.86517	89	ref		5.18518	135
supercont1.1003:97155	T	C	Substitution	AAEL014091	AAEL014091-RA	Red/Ox	Cu-Zn superoxide dismutase CUSOD1	SYNONYMOUS_CODING	396	132	F>F		0.85669	0.88595	0.89785	-	-	-		1.78571	56	ref		1.06383	94	ref		0	90	ref		12.1212	33	ref		1.78571	56	ref		5.55556	36	ref		0	82	ref		0	127
supercont1.1003:97230	T	A	Substitution	AAEL014091	AAEL014091-RA	Red/Ox	Cu-Zn superoxide dismutase CUSOD1	SYNONYMOUS_CODING	471	157	I>I		0.87199	0.88443	0.89364	-	-	-		0	47	ref		0	97	ref		0	69	ref		0	50	ref		0	51	ref		0	58	ref		0	43	ref		0	84
supercont1.1003:97233	C	T	Substitution	AAEL014091	AAEL014091-RA	Red/Ox	Cu-Zn superoxide dismutase CUSOD1	SYNONYMOUS_CODING	474	158	N>N		0.88214	0.8907	0.61133	Nakh	-	-		97.619	42	T		86.4583	96	C/T		88.4615	78	C/T		27.7778	54	ref		66	50	C/T		46.0317	63	C/T		69.3878	49	C/T		72.7273	88
supercont1.1003:97236	T	C	Substitution	AAEL014091	AAEL014091-RA	Red/Ox	Cu-Zn superoxide dismutase CUSOD1	SYNONYMOUS_CODING	477	159	N>N		0.89281	0.87434	0.89042	-	-	-		0	46	ref		14.8515	101	C/T		11.1111	81	C/T		0	53	ref		0	51	ref		0	69	ref		0	52	ref		0	91
supercont1.1003:97260	G	A	Substitution	AAEL014091	AAEL014091-RA	Red/Ox	Cu-Zn superoxide dismutase CUSOD1	SYNONYMOUS_CODING	501	167	E>E		0.81458	0.87492	0.88958	-	-	-		0	109	ref		0	148	ref		0	125	ref		68.0412	97	A/G		29.7872	94	A/G		51.3043	115	A/G		26.3158	95	A/G		30.2469	162
supercont1.1003:97272	A	T	Substitution	AAEL014091	AAEL014091-RA	Red/Ox	Cu-Zn superoxide dismutase CUSOD1	SYNONYMOUS_CODING	513	171	G>G		0.89004	0.89621	0.90085	-	-	-		52.6316	114	A/T		35.1515	165	A/T		27.3973	146	A/T		0	120	ref		19.8198	111	ref		12.0301	133	A/T		13.1579	114	A/T		7.17949	195
supercont1.101:651659	G	A	Substitution	AAEL003933	AAEL003933-RA	Other detox	oxidase, two peroxidase domains DBLOX	SYNONYMOUS_CODING	4212	1404	I>I		0.8895	0.89893	0.90369	-	-	-		30.3571	56	ref		46.3415	41	A/G		47.8261	46	A/G		0	38	ref		9.375	32	ref		4.7619	42	ref		23.0769	52	A/G		12.8571	70
supercont1.101:651689	T	G	Substitution	AAEL003933	AAEL003933-RA	Other detox	oxidase, two peroxidase domains DBLOX	SYNONYMOUS_CODING	4182	1394	G>G		0.87783	0.88714	0.89315	-	-	-		35.7143	42	ref		31.7073	41	G/T		25	52	G/T		0	29	lc		0	31	ref		0	45	ref		0	46	ref		0	72
supercont1.101:651692	C	T	Substitution	AAEL003933	AAEL003933-RA	Other detox	oxidase, two peroxidase domains DBLOX	SYNONYMOUS_CODING	4179	1393	Q>Q		0.81146	0.89017	0.90276	Nakh	-	-		0	44	ref		0	42	ref		0	56	ref		32.3529	34	ref		0	36	ref		0	42	ref		4.44444	45	ref		0	73
supercont1.101:651722	T	C	Substitution	AAEL003933	AAEL003933-RA	Other detox	oxidase, two peroxidase domains DBLOX	SYNONYMOUS_CODING	4149	1383	Q>Q		0.88589	0.87055	0.90105	StGe	-	-		47.6191	42	C/T		42.2222	45	C/T		24.4444	45	C/T		100	38	C		25.641	39	ref		28.5714	49	C/T		28.8889	45	C/T		46.5753	73
supercont1.101:651785	C	T	Substitution	AAEL003933	AAEL003933-RA	Other detox	oxidase, two peroxidase domains DBLOX	SYNONYMOUS_CODING	4086	1362	R>R		0.87419	0.89674	0.8457	-	-	-		74.4186	43	C/T		77.2727	44	C/T		85.3658	41	C/T		100	37	T		58.1395	43	C/T		53.0612	49	C/T		63.8298	47	C/T		60	70
supercont1.101:651818	G	A	Substitution	AAEL003933	AAEL003933-RA	Other detox	oxidase, two peroxidase domains DBLOX	SYNONYMOUS_CODING	4053	1351	C>C		0.88726	0.88179	0.90009	Cayn; StGe	-	-		24.1935	62	ref		34.6154	52	A/G		35.7143	56	A/G		100	53	A		30.3571	56	ref		36.0656	61	A/G		33.3333	66	A/G		43.4783	92
supercont1.101:651827	A	G	Substitution	AAEL003933	AAEL003933-RA	Other detox	oxidase, two peroxidase domains DBLOX	SYNONYMOUS_CODING	4044	1348	S>S		0.85953	0.87434	0.85348	-	-	-		17.2414	58	ref		20.4082	49	A/G		15.2542	59	A/G		0	57	ref		0	57	ref		0	72	ref		0	72	ref		0	96
supercont1.101:651848	A	G	Substitution	AAEL003933	AAEL003933-RA	Other detox	oxidase, two peroxidase domains DBLOX	SYNONYMOUS_CODING	4023	1341	I>I		0.8256	0.89459	0.88958	StGe	-	-		100	59	G		100	51	G		100	71	G		100	56	G		52.6316	57	A/G		39.7436	78	A/G		55.0725	69	A/G		66.6667	96
supercont1.101:651998	G	A	Substitution	AAEL003933	AAEL003933-RA	Other detox	oxidase, two peroxidase domains DBLOX	SYNONYMOUS_CODING	3939	1313	I>I		0.86083	0.88411	0.87411	-	-	-		61.2245	98	A/G		54.8673	113	A/G		63.5417	96	A/G		100	72	A		36.7925	106	A/G		24.5763	118	A/G		49.4737	95	A/G		47.8261	138
supercont1.101:652058	A	G	Substitution	AAEL003933	AAEL003933-RA	Other detox	oxidase, two peroxidase domains DBLOX	SYNONYMOUS_CODING	3879	1293	I>I		0.86559	0.89043	0.89329	-	-	-		100	129	G		100	164	G		100	167	G		100	125	G		45.1389	144	A/G		40.4255	141	A/G		57.6923	130	A/G		56.621	219
supercont1.101:652091	G	T	Substitution	AAEL003933	AAEL003933-RA	Other detox	oxidase, two peroxidase domains DBLOX	SYNONYMOUS_CODING	3846	1282	A>A		0.80268	0.81762	0.84804	-	-	-		31.0078	129	G/T		28.6624	157	G/T		24.4755	143	G/T		60	125	G/T		38.0597	134	G/T		32.5	120	G/T		32.2835	127	G/T		35.6481	216
supercont1.101:652148	A	G	Substitution	AAEL003933	AAEL003933-RA	Other detox	oxidase, two peroxidase domains DBLOX	INTRONIC					0.88743	0.86286	0.85223	-	-	-		9.09091	55	ref		21.9178	73	A/G		22.2222	63	A/G		0	82	ref		0	92	ref		0	89	ref		0	85	ref		0	147
supercont1.101:652154	C	T	Substitution	AAEL003933	AAEL003933-RA	Other detox	oxidase, two peroxidase domains DBLOX	INTRONIC					0.8789	0.84983	0.89621	-	-	-		25.4902	51	ref		33.8462	65	C/T		19.2982	57	C/T		42.8571	77	C/T		22.093	86	ref		17.8571	84	C/T		13.4146	82	C/T		14.6853	143
supercont1.101:652158	G	A	Substitution	AAEL003933	AAEL003933-RA	Other detox	oxidase, two peroxidase domains DBLOX	INTRONIC					0.8842	0.8279	0.90276	-	-	-		28.5714	42	ref		33.3333	54	A/G		17.7778	45	A/G		40.5797	69	A/G		16.0494	81	ref		15.2941	85	A/G		12.8205	78	A/G		13.2812	128
supercont1.101:652164	G	T	Substitution	AAEL003933	AAEL003933-RA	Other detox	oxidase, two peroxidase domains DBLOX	INTRONIC					0.8869	0.85462	0.89022	-	-	-		21.2121	33	ref		14.5833	48	G/T		13.5135	37	ref		0	64	ref		0	74	ref		0	75	ref		0	64	ref		0	124
supercont1.101:652245	C	T	Substitution	AAEL003933	AAEL003933-RA	Other detox	oxidase, two peroxidase domains DBLOX	SYNONYMOUS_CODING	3753	1251	Q>Q		0.7715	0.80146	0.88797	-	-	-		80	35	T		100	50	T		97.619	42	T		100	48	T		25.6098	82	ref		28.0488	82	C/T		44.7761	67	C/T		32	100
supercont1.101:652272	C	T	Substitution	AAEL003933	AAEL003933-RA	Other detox	oxidase, two peroxidase domains DBLOX	SYNONYMOUS_CODING	3726	1242	R>R		0.86333	0.89307	0.90257	-	-	-		0	61	ref		0	70	ref		0	55	ref		35.4839	62	C/T		0	80	ref		0	81	ref		0	75	ref		1	100
supercont1.101:652275	G	A	Substitution	AAEL003933	AAEL003933-RA	Other detox	oxidase, two peroxidase domains DBLOX	SYNONYMOUS_CODING	3723	1241	S>S		0.87838	0.87779	0.89884	-	-	-		91.6667	60	A		100	69	A		94.9153	59	A		63.6364	66	A/G		34.8315	89	A/G		37.8049	82	A/G		52.7778	72	A/G		40.8163	98
supercont1.101:652281	C	T	Substitution	AAEL003933	AAEL003933-RA	Other detox	oxidase, two peroxidase domains DBLOX	SYNONYMOUS_CODING	3717	1239	T>T		0.87199	0.89118	0.90546	-	-	-		0	57	ref		0	74	ref		0	56	ref		38.1818	55	C/T		0	73	ref		0	79	ref		0	70	ref		0.990099	101
supercont1.101:652329	C	T	Substitution	AAEL003933	AAEL003933-RA	Other detox	oxidase, two peroxidase domains DBLOX	SYNONYMOUS_CODING	3669	1223	P>P		0.85521	0.84098	0.88958	-	-	-		37.5	48	C/T		33.9286	56	C/T		28	50	C/T		41.6667	48	C/T		14.8148	54	ref		21.3333	75	C/T		21.4286	56	C/T		17	100
supercont1.101:652350	A	G	Substitution	AAEL003933	AAEL003933-RA	Other detox	oxidase, two peroxidase domains DBLOX	SPLICE_SITE					0.89017	0.75389	0.89234	-	-	-		4.7619	42	ref		21.0526	38	A/G		11.7647	34	ref		15.3846	26	lc		8.69565	46	ref		11.8644	59	ref		6.52174	46	ref		10.5263	76
supercont1.101:652452	A	G	Substitution	AAEL003933	AAEL003933-RA	Other detox	oxidase, two peroxidase domains DBLOX	SYNONYMOUS_CODING	3609	1203	I>I		0.88521	0.87186	0.89667	-	-	-		17.1429	35	ref		29.4118	34	A/G		10.2041	49	ref		12.8205	39	ref		0	49	ref		0	58	ref		0	54	ref		1	100
supercont1.101:652455	A	G	Substitution	AAEL003933	AAEL003933-RA	Other detox	oxidase, two peroxidase domains DBLOX	SYNONYMOUS_CODING	3606	1202	I>I		0.8878	0.88918	0.89612	-	-	-		17.9487	39	ref		28.5714	35	A/G		10	50	ref		11.1111	36	ref		0	54	ref		0	58	ref		0	56	ref		0.980392	102
supercont1.101:652515	C	T	Substitution	AAEL003933	AAEL003933-RA	Other detox	oxidase, two peroxidase domains DBLOX	SYNONYMOUS_CODING	3546	1182	P>P		0.8767	0.8941	0.90105	-	-	-		26.8293	41	ref		24.2424	33	C/T		20.7547	53	C/T		0	59	ref		7.84314	51	ref		3.44828	58	ref		9.23077	65	ref		12.5	96
supercont1.101:652521	T	C	Substitution	AAEL003933	AAEL003933-RA	Other detox	oxidase, two peroxidase domains DBLOX	SYNONYMOUS_CODING	3540	1180	L>L		0.88248	0.83523	0.82301	-	-	-		43.2432	37	C/T		43.75	32	C/T		36.5385	52	C/T		21.8182	55	ref		7.27273	55	ref		3.33333	60	ref		7.14286	70	ref		11.7021	94
supercont1.101:652614	A	T	Substitution	AAEL003933	AAEL003933-RA	Other detox	oxidase, two peroxidase domains DBLOX	SYNONYMOUS_CODING	3447	1149	R>R		0.88654	0.88687	0.86779	-	-	-		12.9032	31	ref		11.9048	42	A/T		11.8644	59	A/T		0	53	ref		2.77778	72	ref		4.93827	81	ref		1.36986	73	ref		3.1746	126
supercont1.101:652626	G	A	Substitution	AAEL003933	AAEL003933-RA	Other detox	oxidase, two peroxidase domains DBLOX	SYNONYMOUS_CODING	3435	1145	C>C		0.8895	0.86782	0.88797	-	-	-		26.6667	30	ref		15.5556	45	A/G		15	60	A/G		0	72	ref		0	68	ref		0	84	ref		0	79	ref		0	116
supercont1.101:652629	C	T	Substitution	AAEL003933	AAEL003933-RA	Other detox	oxidase, two peroxidase domains DBLOX	SYNONYMOUS_CODING	3432	1144	L>L		0.89359	0.89435	0.90351	-	-	-		32.2581	31	ref		63.0435	46	C/T		55.7377	61	C/T		64.7059	68	C/T		27.5362	69	ref		44.3182	88	C/T		52.6316	76	C/T		48.7395	119
supercont1.101:652653	T	C	Substitution	AAEL003933	AAEL003933-RA	Other detox	oxidase, two peroxidase domains DBLOX	SYNONYMOUS_CODING	3408	1136	P>P		0.88214	0.87675	0.89679	-	-	-		43.2432	37	C/T		49.1228	57	C/T		50	72	C/T		1.2987	77	ref		6.66667	75	ref		9.89011	91	C/T		13.8889	72	C/T		7.63359	131
supercont1.101:652656	A	G	Substitution	AAEL003933	AAEL003933-RA	Other detox	oxidase, two peroxidase domains DBLOX	SYNONYMOUS_CODING	3405	1135	I>I		0.47395	0.89118	0.90105	-	-	-		28.5714	35	ref		0	57	ref		2.7027	74	ref		32.4324	74	A/G		0	76	ref		0	91	ref		2.63158	76	ref		0.729927	137
supercont1.101:652659	A	T	Substitution	AAEL003933	AAEL003933-RA	Other detox	oxidase, two peroxidase domains DBLOX	SYNONYMOUS_CODING	3402	1134	G>G		0.85953	0.88475	0.89725	Cayn	-	-		97.3684	38	T		90.9091	55	A/T		95.9459	74	T		100	82	T		40.5405	74	A/T		45.6522	92	A/T		64.9351	77	A/T		58.156	141
supercont1.101:652716	A	G	Substitution	AAEL003933	AAEL003933-RA	Other detox	oxidase, two peroxidase domains DBLOX	SYNONYMOUS_CODING	3345	1115	I>I		0.89494	0.85783	0.89364	-	-	-		21.4286	56	ref		44.2857	70	A/G		35.5556	90	A/G		70.4918	61	A/G		36.2745	102	A/G		26.4706	102	A/G		40.5941	101	A/G		45.8065	155
supercont1.101:652728	T	C	Substitution	AAEL003933	AAEL003933-RA	Other detox	oxidase, two peroxidase domains DBLOX	SYNONYMOUS_CODING	3333	1111	E>E		0.86083	0.89605	0.90545	-	-	-		0	61	ref		0	76	ref		0	95	ref		27.1186	59	ref		0	103	ref		0	109	ref		0.970874	103	ref		0	156
supercont1.101:652737	G	A	Substitution	AAEL003933	AAEL003933-RA	Other detox	oxidase, two peroxidase domains DBLOX	SYNONYMOUS_CODING	3324	1108	H>H		0.88936	0.81145	0.90228	-	-	-		77.0492	61	A/G		62.1951	82	A/G		64.5833	96	A/G		21.6667	60	ref		10.6796	103	ref		10.4762	105	A/G		14.2857	98	A/G		13.245	151
supercont1.101:652752	G	A	Substitution	AAEL003933	AAEL003933-RA	Other detox	oxidase, two peroxidase domains DBLOX	SYNONYMOUS_CODING	3309	1103	G>G		0.86207	0.89293	0.90094	Nakh	-	-		0	58	ref		0	79	ref		0	100	ref		16.6667	72	ref		0	86	ref		0	102	ref		0	90	ref		0	138
supercont1.101:652782	C	A	Substitution	AAEL003933	AAEL003933-RA	Other detox	oxidase, two peroxidase domains DBLOX	SYNONYMOUS_CODING	3279	1093	P>P		0.88214	0.89738	0.8354	Nakh	-	-		0	72	ref		0	86	ref		0	96	ref		23.3766	77	ref		0	86	ref		0	87	ref		0	84	ref		0	156
supercont1.101:652959	C	T	Substitution	AAEL003933	AAEL003933-RA	Other detox	oxidase, two peroxidase domains DBLOX	SYNONYMOUS_CODING	3102	1034	A>A		0.85669	0.8932	0.89513	-	-	-		100	89	T		100	88	T		100	80	T		100	64	T		46.5116	86	C/T		46.1538	78	C/T		58.8889	90	C/T		60.4317	139
supercont1.101:652965	C	T	Substitution	AAEL003933	AAEL003933-RA	Other detox	oxidase, two peroxidase domains DBLOX	SYNONYMOUS_CODING	3096	1032	E>E		0.86207	0.89725	0.88628	-	-	-		34.7826	92	C/T		36.6667	90	C/T		36.4706	85	C/T		0	70	ref		6.09756	82	ref		13.4146	82	C/T		22.5806	93	C/T		10.274	146
supercont1.101:653010	G	A	Substitution	AAEL003933	AAEL003933-RA	Other detox	oxidase, two peroxidase domains DBLOX	SYNONYMOUS_CODING	3051	1017	Y>Y		0.81146	0.89786	0.89398	StGe	-	-		0	98	ref		0	122	ref		0	103	ref		0	80	ref		46	100	A/G		57.1429	98	A/G		42.3423	111	A/G		36.7742	155
supercont1.101:653022	G	T	Substitution	AAEL003933	AAEL003933-RA	Other detox	oxidase, two peroxidase domains DBLOX	SYNONYMOUS_CODING	3039	1013	L>L		0.8667	0.89751	0.88439	StGe	-	-		0	102	ref		0	122	ref		0	114	ref		0	74	ref		45.098	102	G/T		60.1852	108	G/T		42.4	125	G/T		36.129	155
supercont1.101:653027	A	G	Substitution	AAEL003933	AAEL003933-RA	Other detox	oxidase, two peroxidase domains DBLOX	SYNONYMOUS_CODING	3034	1012	L>L		0.88799	0.89459	0.88853	-	-	-		7.89474	114	ref		0	109	ref		2.63158	114	ref		8.4507	71	ref		44.5545	101	A/G		58.8785	107	A/G		43.0894	123	A/G		35.443	158
supercont1.101:653046	T	C	Substitution	AAEL003933	AAEL003933-RA	Other detox	oxidase, two peroxidase domains DBLOX	SYNONYMOUS_CODING	3015	1005	V>V		0.87613	0.89698	0.88933	-	-	-		100	103	C		100	97	C		100	96	C		100	56	C		51.4286	105	C/T		38.6139	101	C/T		57.1429	119	C/T		61.0738	149
supercont1.101:653199	G	A	Substitution	AAEL003933	AAEL003933-RA	Other detox	oxidase, two peroxidase domains DBLOX	SYNONYMOUS_CODING	2862	954	R>R		0.83979	0.89278	0.88305	-	-	-		25.5556	90	ref		27.9661	118	A/G		24.3697	119	A/G		0	102	ref		4.0404	99	ref		7.8125	128	ref		5.64516	124	ref		7.87879	165
supercont1.101:653208	G	A	Substitution	AAEL003933	AAEL003933-RA	Other detox	oxidase, two peroxidase domains DBLOX	SYNONYMOUS_CODING	2853	951	I>I		0.81458	0.89264	0.90399	-	-	-		0	91	ref		0	131	ref		0	132	ref		31.4815	108	A/G		0	105	ref		0	130	ref		0.813008	123	ref		2.92398	171
supercont1.101:653220	C	T	Substitution	AAEL003933	AAEL003933-RA	Other detox	oxidase, two peroxidase domains DBLOX	SYNONYMOUS_CODING	2841	947	V>V		0.79693	0.87969	0.90501	-	-	-		64.7059	85	C/T		62.2951	122	C/T		56.6667	120	C/T		100	105	T		46.3918	97	C/T		31.9328	119	C/T		43.2	125	C/T		45.2381	168
supercont1.101:653223	G	T	Substitution	AAEL003933	AAEL003933-RA	Other detox	oxidase, two peroxidase domains DBLOX	SYNONYMOUS_CODING	2838	946	T>T		0.88473	0.84133	0.90286	-	-	-		32.9545	88	G/T		38.2114	123	G/T		34.7458	118	G/T		67.5676	111	G/T		37.6238	101	G/T		22.6891	119	G/T		35.7143	126	G/T		31.7647	170
supercont1.101:653250	C	A	Substitution	AAEL003933	AAEL003933-RA	Other detox	oxidase, two peroxidase domains DBLOX	SYNONYMOUS_CODING	2811	937	A>A		0.87726	0.89017	0.89667	-	-	-		51.7241	58	A/C		54.3478	92	A/C		49.5238	105	A/C		62.6374	91	A/C		41.9753	81	A/C		29.8851	87	A/C		26.5957	94	A/C		38.7597	129
supercont1.101:653253	A	G	Substitution	AAEL003933	AAEL003933-RA	Other detox	oxidase, two peroxidase domains DBLOX	SYNONYMOUS_CODING	2808	936	D>D		0.87041	0.88375	0.86928	-	-	-		12.963	54	ref		17.2414	87	A/G		12.7451	102	A/G		0	94	ref		2.17391	92	ref		4.49438	89	ref		3.37079	89	ref		6.20155	129
supercont1.101:653301	A	G	Substitution	AAEL003933	AAEL003933-RA	Other detox	oxidase, two peroxidase domains DBLOX	SYNONYMOUS_CODING	2760	920	I>I		0.8767	0.75389	0.88667	-	-	-		8.92857	56	ref		13.7931	58	A/G		13.0435	69	A/G		17.7419	62	ref		8.69565	69	ref		5.61798	89	ref		6.94444	72	ref		10.4651	86
supercont1.101:653376	C	A	Substitution	AAEL003933	AAEL003933-RA	Other detox	oxidase, two peroxidase domains DBLOX	SYNONYMOUS_CODING	2685	895	L>L		0.88445	0.79242	0.90453	-	-	-		87.5	40	A		93.0233	43	A		96.5517	58	A		18.75	48	ref		21.7949	78	ref		15.3846	91	A/C		22.8571	70	A/C		20.5607	107
supercont1.101:653394	G	A	Substitution	AAEL003933	AAEL003933-RA	Other detox	oxidase, two peroxidase domains DBLOX	SYNONYMOUS_CODING	2667	889	G>G		0.88445	0.77501	0.90136	Nakh	-	-		87.3016	63	A		96.9231	65	A		96.5517	87	A		28.0702	57	ref		28.0899	89	ref		20	85	A/G		31.5789	76	A/G		32.5203	123
supercont1.101:653411	T	C	Substitution	AAEL003933	AAEL003933-RA	Other detox	oxidase, two peroxidase domains DBLOX	NON_SYNONYMOUS_CODING	2650	884	I>V		0.89073	0.78172	0.89938	Nakh	-	-		15.4639	97	ref		1.0101	99	ref		1.69492	118	ref		53.2468	77	C/T		66.9903	103	C/T		77.0833	96	C/T		62.3656	93	C/T		65.5629	151
supercont1.101:653439	T	C	Substitution	AAEL003933	AAEL003933-RA	Other detox	oxidase, two peroxidase domains DBLOX	SYNONYMOUS_CODING	2622	874	Q>Q		0.87613	0.89636	0.90406	-	-	-		57.2519	131	C/T		54.4118	136	C/T		62.1795	156	C/T		100	110	C		91.3793	116	C		95.1456	103	C		82.9787	141	C/T		82.0896	201
supercont1.101:653478	C	T	Substitution	AAEL003933	AAEL003933-RA	Other detox	oxidase, two peroxidase domains DBLOX	SYNONYMOUS_CODING	2583	861	P>P		0.88799	0.86782	0.81456	-	-	-		30.6452	124	C/T		18.1034	116	C/T		26.4463	121	C/T		43.956	91	C/T		11.6505	103	ref		10.101	99	C/T		10.274	146	C/T		15.3846	169
supercont1.101:653505	T	C	Substitution	AAEL003933	AAEL003933-RA	Other detox	oxidase, two peroxidase domains DBLOX	SYNONYMOUS_CODING	2556	852	L>L		0.88024	0.81798	0.88909	StGe; Nakh	-	-		10.8696	92	ref		11.215	107	C/T		18.4874	119	C/T		100	54	C		19.5652	92	ref		15.3846	104	C/T		18.4874	119	C/T		28.0255	157
supercont1.101:653514	G	T	Substitution	AAEL003933	AAEL003933-RA	Other detox	oxidase, two peroxidase domains DBLOX	SYNONYMOUS_CODING	2547	849	G>G		0.88024	0.82193	0.89081	-	-	-		2.32558	86	ref		8.16327	98	ref		10.3774	106	G/T		19.4444	36	ref		2.46914	81	ref		3.33333	90	ref		2.77778	108	ref		5.07246	138
supercont1.101:653517	A	G	Substitution	AAEL003933	AAEL003933-RA	Other detox	oxidase, two peroxidase domains DBLOX	SYNONYMOUS_CODING	2544	848	S>S		0.85238	0.80599	0.8949	-	-	-		1.17647	85	ref		4.34783	92	ref		11.1111	108	A/G		15.625	32	ref		2.73973	73	ref		5.74713	87	ref		3.63636	110	ref		5.30303	132
supercont1.101:653559	C	A	Substitution	AAEL003933	AAEL003933-RA	Other detox	oxidase, two peroxidase domains DBLOX	SYNONYMOUS_CODING	2502	834	V>V		0.88891	0.89981	0.90085	-	-	-		33.3333	81	A/C		23.1481	108	A/C		29.5082	122	A/C		98.2143	56	A		62.069	58	A/C		75.7143	70	A/C		58.6667	75	A/C		56.9231	130
supercont1.101:653568	T	A	Substitution	AAEL003933	AAEL003933-RA	Other detox	oxidase, two peroxidase domains DBLOX	SYNONYMOUS_CODING	2493	831	P>P		0.88834	0.76639	0.89502	-	-	-		2.22222	90	ref		0	114	ref		0	137	ref		6.45161	62	ref		13.4615	52	ref		18.6441	59	A/T		13.4328	67	A/T		17.2131	122
supercont1.101:653574	A	G	Substitution	AAEL003933	AAEL003933-RA	Other detox	oxidase, two peroxidase domains DBLOX	SYNONYMOUS_CODING	2487	829	C>C		0.86559	0.90466	0.86124	Cayn	-	-		36	100	A/G		30.4348	115	A/G		36.2205	127	A/G		98.4848	66	G		48.1481	54	A/G		71.1864	59	A/G		58.7302	63	A/G		56.25	112
supercont1.101:653583	A	G	Substitution	AAEL003933	AAEL003933-RA	Other detox	oxidase, two peroxidase domains DBLOX	SYNONYMOUS_CODING	2478	826	H>H		0.86559	0.89017	0.81978	-	-	-		0	100	ref		0	118	ref		0	142	ref		0	75	ref		3.57143	56	ref		6.34921	63	ref		0	66	ref		1.8018	111
supercont1.101:653586	G	A	Substitution	AAEL003933	AAEL003933-RA	Other detox	oxidase, two peroxidase domains DBLOX	SYNONYMOUS_CODING	2475	825	V>V		0.8256	0.80518	0.89022	-	-	-		15.0442	113	ref		14.9123	114	A/G		10.4167	144	A/G		2.32558	86	ref		7.46269	67	ref		8.95522	67	ref		2.7027	74	ref		3.53982	113
supercont1.101:653595	C	T	Substitution	AAEL003933	AAEL003933-RA	Other detox	oxidase, two peroxidase domains DBLOX	SYNONYMOUS_CODING	2466	822	P>P		0.87419	0.90242	0.85952	-	-	-		0	114	ref		0	118	ref		0	152	ref		0	97	ref		18.8406	69	ref		21.519	79	C/T		11.6279	86	C/T		8.59375	128
supercont1.101:653619	G	C	Substitution	AAEL003933	AAEL003933-RA	Other detox	oxidase, two peroxidase domains DBLOX	SYNONYMOUS_CODING	2442	814	P>P		0.81986	0.89919	0.88056	-	-	-		0	120	ref		0	133	ref		0	165	ref		0	128	ref		16.0714	112	ref		7.92079	101	ref		8.03571	112	ref		16.4706	170
supercont1.101:653694	A	C	Substitution	AAEL003933	AAEL003933-RA	Other detox	oxidase, two peroxidase domains DBLOX	SYNONYMOUS_CODING	2367	789	V>V		0.80586	0.64478	0.90399	-	-	-		0	120	ref		0	157	ref		0	175	ref		16.0584	137	ref		5.30303	132	ref		3.10078	129	ref		6.80272	147	ref		6.52174	184
supercont1.101:653712	A	T	Substitution	AAEL003933	AAEL003933-RA	Other detox	oxidase, two peroxidase domains DBLOX	SYNONYMOUS_CODING	2349	783	T>T		0.82791	0.89931	0.88853	-	-	-		23.8938	113	ref		22.9299	157	A/T		16.9591	171	A/T		9.56522	115	ref		48.9583	96	A/T		38.5321	109	A/T		24.8062	129	A/T		26.5432	162
supercont1.101:653715	A	G	Substitution	AAEL003933	AAEL003933-RA	Other detox	oxidase, two peroxidase domains DBLOX	SYNONYMOUS_CODING	2346	782	H>H		0.83512	0.90154	0.82739	-	-	-		24.7863	117	ref		20	155	A/G		16.8605	172	A/G		8.92857	112	ref		48.1132	106	A/G		33.3333	111	A/G		21.9697	132	A/G		25.3012	166
supercont1.101:653736	G	A	Substitution	AAEL003933	AAEL003933-RA	Other detox	oxidase, two peroxidase domains DBLOX	SYNONYMOUS_CODING	2325	775	H>H		0.88762	0.90514	0.89061	StGe	-	-		52.2522	111	A/G		45.1389	144	A/G		45.1613	155	A/G		99.0826	109	A		76.1364	88	A/G		75.2809	89	A/G		58.7156	109	A/G		68.4564	149
supercont1.101:653823	A	G	Substitution	AAEL003933	AAEL003933-RA	Other detox	oxidase, two peroxidase domains DBLOX	SYNONYMOUS_CODING	2238	746	V>V		0.88101	0.8924	0.83481	-	-	-		1.36986	73	ref		0	122	ref		0	141	ref		1.21951	82	ref		26.8657	67	ref		24.0506	79	A/G		14.4444	90	A/G		16.2338	154
supercont1.101:653829	T	C	Substitution	AAEL003933	AAEL003933-RA	Other detox	oxidase, two peroxidase domains DBLOX	SYNONYMOUS_CODING	2232	744	P>P		0.86333	0.89774	0.81456	-	-	-		7.69231	78	ref		9.73451	113	C/T		7.14286	140	ref		1.23457	81	ref		26.8657	67	ref		24.6753	77	C/T		14.6067	89	C/T		16.2338	154
supercont1.101:653865	T	C	Substitution	AAEL003933	AAEL003933-RA	Other detox	oxidase, two peroxidase domains DBLOX	SYNONYMOUS_CODING	2196	732	L>L		0.86858	0.89944	0.85223	-	-	-		8.13954	86	ref		9.09091	99	ref		6.99301	143	ref		0	65	ref		21.4286	56	ref		24.1379	58	C/T		8.64198	81	ref		9.72222	144
supercont1.101:653895	G	T	Substitution	AAEL003933	AAEL003933-RA	Other detox	oxidase, two peroxidase domains DBLOX	SYNONYMOUS_CODING	2166	722	G>G		0.87041	0.90251	0.88305	StGe	-	-		24.4681	94	ref		33.6957	92	G/T		37.4046	131	G/T		96.9231	65	T		75	36	G/T		69.2308	39	G/T		56.7164	67	G/T		62.5	104
supercont1.101:653901	C	T	Substitution	AAEL003933	AAEL003933-RA	Other detox	oxidase, two peroxidase domains DBLOX	SYNONYMOUS_CODING	2160	720	L>L		0.80817	0.89751	0.87139	-	-	-		27.2727	88	ref		31.5217	92	C/T		38.3333	120	C/T		89.2308	65	T		65.8537	41	C/T		60.5263	38	C/T		52.1739	69	C/T		62.766	94
supercont1.101:653913	C	T	Substitution	AAEL003933	AAEL003933-RA	Other detox	oxidase, two peroxidase domains DBLOX	SYNONYMOUS_CODING	2148	716	P>P		0.83763	0.81322	0.89765	-	-	-		12.6582	79	ref		14.6067	89	C/T		9.16667	120	ref		11.4754	61	ref		17.0732	41	ref		13.9535	43	C/T		8.33333	60	ref		3.06122	98
supercont1.101:653942	A	G	Substitution	AAEL003933	AAEL003933-RA	Other detox	oxidase, two peroxidase domains DBLOX	SYNONYMOUS_CODING	2119	707	L>L		0.8256	0.90282	0.87542	-	-	-		46.8354	79	A/G		48.913	92	A/G		46.8468	111	A/G		98.7013	77	G		78.1818	55	G		81.4815	54	A/G		61.9718	71	A/G		71.8447	103
supercont1.101:653967	G	T	Substitution	AAEL003933	AAEL003933-RA	Other detox	oxidase, two peroxidase domains DBLOX	SYNONYMOUS_CODING	2094	698	I>I		0.8842	0.89343	0.89364	-	-	-		4.65116	86	ref		0	87	ref		1.0989	91	ref		0	79	ref		53.7313	67	G/T		55.1724	58	G/T		36.5854	82	G/T		30.0885	113
supercont1.101:653979	A	G	Substitution	AAEL003933	AAEL003933-RA	Other detox	oxidase, two peroxidase domains DBLOX	SYNONYMOUS_CODING	2082	694	S>S		0.85953	0.88968	0.90421	-	-	-		48.1481	81	A/G		43.3735	83	A/G		46.4286	84	A/G		62.3188	69	A/G		86.5672	67	G		81.8182	55	A/G		67.5325	77	A/G		78.1818	110
supercont1.101:654015	C	T	Substitution	AAEL003933	AAEL003933-RA	Other detox	oxidase, two peroxidase domains DBLOX	SYNONYMOUS_CODING	2046	682	L>L		0.8869	0.81388	0.89431	-	-	-		40	55	C/T		28.8136	59	C/T		41.8182	55	C/T		37.2093	43	ref		14.8936	47	ref		22.5	40	C/T		17.8571	56	C/T		20.2532	79
supercont1.101:654027	G	A	Substitution	AAEL003933	AAEL003933-RA	Other detox	oxidase, two peroxidase domains DBLOX	SYNONYMOUS_CODING	2034	678	F>F		0.87978	0.89893	0.88909	-	-	-		68.75	48	A/G		75.5102	49	A/G		68.6275	51	A/G		2.7027	37	ref		7.31707	41	ref		21.2121	33	A/G		26.087	46	A/G		26.2295	61
supercont1.101:654340	A	G	Substitution	AAEL003933	AAEL003933-RA	Other detox	oxidase, two peroxidase domains DBLOX	SPLICE_SITE					0.88815	0.89994	0.87836	-	-	-		3.19149	94	ref		0	127	ref		0	124	ref		0	13	lc		27.7778	36	ref		31.4286	35	A/G		9.7561	41	ref		14.5161	62
supercont1.101:654386	T	A	Substitution	AAEL003933	AAEL003933-RA	Other detox	oxidase, two peroxidase domains DBLOX	NON_SYNONYMOUS_CODING	1796	599	N>I		0.83979	0.8712	0.88766	-	-	-		18.6274	102	ref		16.6667	132	A/T		12.8571	140	A/T		63.4146	82	A/T		26.506	83	ref		22.7273	88	A/T		24.4898	98	A/T		32.2368	152
supercont1.101:654391	C	T	Substitution	AAEL003933	AAEL003933-RA	Other detox	oxidase, two peroxidase domains DBLOX	SYNONYMOUS_CODING	1791	597	Q>Q		0.84769	0.89131	0.90115	-	-	-		0	95	ref		0	130	ref		0	138	ref		0	90	ref		8.88889	90	ref		6.59341	91	ref		8.18182	110	ref		7.69231	156
supercont1.101:654433	G	A	Substitution	AAEL003933	AAEL003933-RA	Other detox	oxidase, two peroxidase domains DBLOX	SYNONYMOUS_CODING	1749	583	N>N		0.88521	0.89182	0.89979	-	-	-		0	88	ref		0	141	ref		0	117	ref		0	101	ref		8.64198	81	ref		4	100	ref		7.75862	116	ref		9.42408	191
supercont1.101:654455	G	A	Substitution	AAEL003933	AAEL003933-RA	Other detox	oxidase, two peroxidase domains DBLOX	NON_SYNONYMOUS_CODING	1727	576	P>L		0.85953	0.89459	0.89081	-	-	-		0	76	ref		0	128	ref		0	115	ref		0	88	ref		50.6173	81	A/G		56.5657	99	A/G		43.8095	105	A/G		38.961	154
supercont1.101:654472	T	C	Substitution	AAEL003933	AAEL003933-RA	Other detox	oxidase, two peroxidase domains DBLOX	SYNONYMOUS_CODING	1710	570	E>E		0.88906	0.82445	0.89793	-	-	-		25.3165	79	ref		40.9836	122	C/T		34.5133	113	C/T		16.25	80	ref		2.5974	77	ref		1.08696	92	ref		5.37634	93	ref		3.50877	171
supercont1.101:654477	C	A	Substitution	AAEL003933	AAEL003933-RA	Other detox	oxidase, two peroxidase domains DBLOX	NON_SYNONYMOUS_CODING	1705	569	V>L		0.89608	0.87875	0.89645	-	-	-		22.5	80	ref		42.5	120	A/C		35.5932	118	A/C		19.2308	78	ref		0	80	ref		1.16279	86	ref		3.2967	91	ref		3.77358	159
supercont1.101:654499	A	G	Substitution	AAEL003933	AAEL003933-RA	Other detox	oxidase, two peroxidase domains DBLOX	SYNONYMOUS_CODING	1683	561	T>T		0.89564	0.79709	0.87542	StGe	-	-		34.6667	75	A/G		11.236	89	A/G		23.5955	89	A/G		100	59	G		22.8571	70	ref		27.5	80	A/G		16.4557	79	A/G		31.0078	129
supercont1.101:654508	A	G	Substitution	AAEL003933	AAEL003933-RA	Other detox	oxidase, two peroxidase domains DBLOX	SYNONYMOUS_CODING	1674	558	R>R		0.86559	0.70969	0.8772	Cayn; StGe	-	-		35.0649	77	A/G		42.5	80	A/G		48.8095	84	A/G		100	54	G		14.1176	85	ref		20.2703	74	A/G		13.9535	86	A/G		25	124
supercont1.101:654528	G	A	Substitution	AAEL003933	AAEL003933-RA	Other detox	oxidase, two peroxidase domains DBLOX	SYNONYMOUS_CODING	1654	552	L>L		0.85953	0.89293	0.89656	-	-	-		59.322	59	A/G		64.2857	56	A/G		56.6667	60	A/G		0	53	ref		12.1951	82	ref		8.97436	78	ref		18.5185	81	A/G		14.5985	137
supercont1.101:654745	G	C	Substitution	AAEL003933	AAEL003933-RA	Other detox	oxidase, two peroxidase domains DBLOX	SYNONYMOUS_CODING	1437	479	A>A		0.8667	0.89383	0.89691	-	-	-		0	32	ref		0	45	ref		0	41	ref		14.5161	62	ref		0	104	ref		0	109	ref		0	101	ref		0	171
supercont1.101:654751	A	G	Substitution	AAEL003933	AAEL003933-RA	Other detox	oxidase, two peroxidase domains DBLOX	SYNONYMOUS_CODING	1431	477	L>L		0.8767	0.83749	0.80989	-	-	-		45.1613	31	A/G		38.4615	39	A/G		48.7805	41	A/G		1.63934	61	ref		1.07527	93	ref		5.71429	105	ref		3.22581	93	ref		6.11111	180
supercont1.101:654762	G	A	Substitution	AAEL003933	AAEL003933-RA	Other detox	oxidase, two peroxidase domains DBLOX	SYNONYMOUS_CODING	1420	474	L>L		0.70762	0.88781	0.90032	-	-	-		100	33	A		100	41	A		100	38	A		100	52	A		38.9474	95	A/G		34.0206	97	A/G		48.3516	91	A/G		50.2825	177
supercont1.101:654766	C	G	Substitution	AAEL003933	AAEL003933-RA	Other detox	oxidase, two peroxidase domains DBLOX	SYNONYMOUS_CODING	1416	472	P>P		0.84588	0.89293	0.83592	-	-	-		0	34	ref		0	44	ref		0	41	ref		24.5902	61	ref		0	92	ref		0	98	ref		0	92	ref		0	175
supercont1.101:654961	A	G	Substitution	AAEL003933	AAEL003933-RA	Other detox	oxidase, two peroxidase domains DBLOX	SYNONYMOUS_CODING	1278	426	T>T		0.74618	0.76268	0.89948	Cayn	-	-		79.5455	44	G		100	56	G		96.7213	61	G		100	39	G		18.4615	65	ref		26.25	80	A/G		39.2405	79	A/G		36.1905	105
supercont1.101:654976	G	A	Substitution	AAEL003933	AAEL003933-RA	Other detox	oxidase, two peroxidase domains DBLOX	SYNONYMOUS_CODING	1263	421	Y>Y		0.8911	0.88299	0.88257	-	-	-		27.2727	44	ref		44.6429	56	A/G		28.3333	60	A/G		0	37	ref		0	65	ref		0	74	ref		0	76	ref		0	99
supercont1.101:655368	T	C	Substitution	AAEL003933	AAEL003933-RA	Other detox	oxidase, two peroxidase domains DBLOX	SYNONYMOUS_CODING	933	311	Q>Q		0.88567	0.84528	0.8984	-	-	-		56.7568	74	C/T		65.5914	93	C/T		67.033	91	C/T		100	52	C		29.4118	102	C/T		25.5102	98	C/T		37.037	81	C/T		37.594	133
supercont1.101:655377	G	A	Substitution	AAEL003933	AAEL003933-RA	Other detox	oxidase, two peroxidase domains DBLOX	SYNONYMOUS_CODING	924	308	L>L		0.87726	0.8862	0.90159	-	-	-		0	89	ref		0	97	ref		0	103	ref		18.1818	66	ref		0	105	ref		0	103	ref		0	88	ref		0	154
supercont1.101:655407	G	A	Substitution	AAEL003933	AAEL003933-RA	Other detox	oxidase, two peroxidase domains DBLOX	SYNONYMOUS_CODING	894	298	I>I		0.84198	0.85173	0.88477	-	-	-		37.6147	109	A/G		35.5769	104	A/G		34.5455	110	A/G		58.5586	111	A/G		23.6641	131	ref		22.4	125	A/G		26.1261	111	A/G		26.7281	217
supercont1.101:655422	G	A	Substitution	AAEL003933	AAEL003933-RA	Other detox	oxidase, two peroxidase domains DBLOX	SYNONYMOUS_CODING	879	293	A>A		0.8767	0.89649	0.90394	-	-	-		35.9223	103	A/G		40.1869	107	A/G		39.6552	116	A/G		31.1475	122	A/G		4.8	125	ref		5.59441	143	ref		21.7391	115	A/G		15.5844	231
supercont1.101:655434	T	A	Substitution	AAEL003933	AAEL003933-RA	Other detox	oxidase, two peroxidase domains DBLOX	SYNONYMOUS_CODING	867	289	R>R		0.86207	0.89017	0.90487	-	-	-		0	102	ref		0	109	ref		0	112	ref		0	117	ref		0	127	ref		0	146	ref		0.793651	126	ref		1.28205	234
supercont1.101:655455	G	A	Substitution	AAEL003933	AAEL003933-RA	Other detox	oxidase, two peroxidase domains DBLOX	SYNONYMOUS_CODING	846	282	T>T		0.87419	0.88687	0.89861	-	-	-		0	106	ref		0	99	ref		0	99	ref		26.8817	93	ref		0	135	ref		0	166	ref		0	146	ref		0	219
supercont1.101:655461	G	A	Substitution	AAEL003933	AAEL003933-RA	Other detox	oxidase, two peroxidase domains DBLOX	SYNONYMOUS_CODING	840	280	D>D		0.88445	0.90391	0.90433	Cayn	-	-		65.9574	94	A/G		76.3441	93	A/G		77.2277	101	A/G		90	80	overlap		24.4444	135	ref		30.0578	173	A/G		44.898	147	A/G		44.2922	219
supercont1.101:655485	T	A	Substitution	AAEL003933	AAEL003933-RA	Other detox	oxidase, two peroxidase domains DBLOX	SYNONYMOUS_CODING	816	272	S>S		0.57041	0.90036	0.90075	-	-	-		21.6867	83	diff		22.2222	90	diff		26.1905	84	diff		18.8679	53	diff		2.14286	140	ref		1.86335	161	diff		7.63889	144	diff		4.32692	208
supercont1.101:655485	T	G	Substitution	AAEL003933	AAEL003933-RA	Other detox	oxidase, two peroxidase domains DBLOX	SYNONYMOUS_CODING	816	272	S>S		0.57041	0.90036	0.90075	StGe	-	-		36.1446	83	G/T		45.5556	90	G/T		45.2381	84	G/T		81.1321	53	G		22.8571	140	ref		26.7081	161	G/T		31.25	144	G/T		37.9808	208
supercont1.101:655551	C	T	Substitution	AAEL003933	AAEL003933-RA	Other detox	oxidase, two peroxidase domains DBLOX	SYNONYMOUS_CODING	750	250	P>P		0.87613	0.88375	0.89218	-	-	-		9.09091	55	ref		15.5844	77	C/T		15.0943	53	C/T		17.5676	74	ref		0.862069	116	ref		1.51515	132	ref		3.4188	117	ref		4.79042	167
supercont1.101:655569	A	G	Substitution	AAEL003933	AAEL003933-RA	Other detox	oxidase, two peroxidase domains DBLOX	SYNONYMOUS_CODING	732	244	C>C		0.87613	0.89881	0.87836	-	-	-		0	66	ref		0	80	ref		0	65	ref		0	83	ref		14.6341	123	ref		13.2231	121	A/G		10.1562	128	A/G		8.77193	171
supercont1.101:655572	T	C	Substitution	AAEL003933	AAEL003933-RA	Other detox	oxidase, two peroxidase domains DBLOX	SYNONYMOUS_CODING	729	243	A>A		0.86559	0.87055	0.88516	-	-	-		32.4324	74	C/T		25.9259	81	C/T		21.875	64	C/T		0	83	ref		0	120	ref		0	121	ref		0	125	ref		0	170
supercont1.101:655584	G	T	Substitution	AAEL003933	AAEL003933-RA	Other detox	oxidase, two peroxidase domains DBLOX	SYNONYMOUS_CODING	717	239	V>V		0.87978	0.88226	0.8917	-	-	-		16.6667	78	ref		26.6667	75	G/T		30.303	66	G/T		0	86	ref		0	111	ref		0	112	ref		0	120	ref		0	167
supercont1.101:655587	C	T	Substitution	AAEL003933	AAEL003933-RA	Other detox	oxidase, two peroxidase domains DBLOX	SYNONYMOUS_CODING	714	238	K>K		0.89564	0.84353	0.88958	-	-	-		41.4286	70	C/T		62.1622	74	C/T		63.7681	69	C/T		59.7561	82	C/T		26.6667	105	ref		26.3636	110	C/T		33.3333	117	C/T		35.8491	159
supercont1.101:655594	T	C	Substitution	AAEL003933	AAEL003933-RA	Other detox	oxidase, two peroxidase domains DBLOX	NON_SYNONYMOUS_CODING	707	236	N>S		0.87419	0.83226	0.8917	-	-	-		12.5	72	ref		24.6377	69	C/T		28.2051	78	C/T		60.4651	86	C/T		27.2727	99	ref		26.9231	104	C/T		31.5789	114	C/T		36.3057	157
supercont1.101:655596	G	C	Substitution	AAEL003933	AAEL003933-RA	Other detox	oxidase, two peroxidase domains DBLOX	SYNONYMOUS_CODING	705	235	T>T		0.84415	0.87555	0.90399	-	-	-		0	73	ref		0	67	ref		0	77	ref		0	85	ref		0	96	ref		0	105	ref		0	115	ref		0	152
supercont1.101:655635	T	C	Substitution	AAEL003933	AAEL003933-RA	Other detox	oxidase, two peroxidase domains DBLOX	SYNONYMOUS_CODING	666	222	G>G		0.79006	0.90546	0.77061	StGe	-	-		53.4247	73	C/T		58.2278	79	C/T		55.2941	85	C/T		97.2973	74	C		29.8701	77	ref		22.8571	105	C/T		25.2427	103	C/T		34.6667	150
supercont1.101:655644	G	A	Substitution	AAEL003933	AAEL003933-RA	Other detox	oxidase, two peroxidase domains DBLOX	SYNONYMOUS_CODING	657	219	G>G		0.88278	0.89577	0.87276	-	-	-		0	72	ref		0	81	ref		0	81	ref		0	63	ref		7.69231	65	ref		5.10204	98	ref		12.3596	89	A/G		16.3121	141
supercont1.101:655689	G	A	Substitution	AAEL003933	AAEL003933-RA	Other detox	oxidase, two peroxidase domains DBLOX	SYNONYMOUS_CODING	612	204	Y>Y		0.78676	0.86633	0.90433	-	-	-		46.1538	65	A/G		43.2432	74	A/G		45.5882	68	A/G		41.2698	63	A/G		8.82353	68	ref		14.2857	63	A/G		15.8537	82	A/G		23.1405	121
supercont1.101:655692	C	T	Substitution	AAEL003933	AAEL003933-RA	Other detox	oxidase, two peroxidase domains DBLOX	SYNONYMOUS_CODING	609	203	E>E		0.89338	0.87555	0.89263	-	-	-		4.61538	65	ref		13.3333	75	C/T		9.09091	66	ref		0	64	ref		0	66	ref		0	63	ref		0	80	ref		0	115
supercont1.101:655698	C	A	Substitution	AAEL003933	AAEL003933-RA	Other detox	oxidase, two peroxidase domains DBLOX	NON_SYNONYMOUS_CODING	603	201	K>N		0.79974	0.86087	0.88883	-	-	-		11.6667	60	ref		10	70	ref		13.6364	66	A/C		0	61	ref		0	67	ref		0	56	ref		0	79	ref		0	111
supercont1.101:655704	G	A	Substitution	AAEL003933	AAEL003933-RA	Other detox	oxidase, two peroxidase domains DBLOX	SYNONYMOUS_CODING	597	199	A>A		0.86559	0.89087	0.89861	-	-	-		0	64	ref		0	68	ref		0	68	ref		57.1429	63	A/G		0	67	ref		0	58	ref		0	80	ref		0	120
supercont1.101:655713	T	C	Substitution	AAEL003933	AAEL003933-RA	Other detox	oxidase, two peroxidase domains DBLOX	SYNONYMOUS_CODING	588	196	E>E		0.89514	0.75752	0.88958	-	-	-		44.6429	56	C/T		23.2143	56	C/T		34.375	64	C/T		38	50	C/T		26.7857	56	ref		28.8136	59	C/T		29.2683	82	C/T		35.5932	118
supercont1.101:655719	G	A	Substitution	AAEL003933	AAEL003933-RA	Other detox	oxidase, two peroxidase domains DBLOX	SYNONYMOUS_CODING	582	194	S>S		0.86759	0.78253	0.86036	-	-	-		8.82353	68	ref		9.23077	65	ref		15.493	71	A/G		29.0909	55	ref		13.2353	68	ref		17.9104	67	A/G		15.1163	86	A/G		21.4286	126
supercont1.101:655728	C	T	Substitution	AAEL003933	AAEL003933-RA	Other detox	oxidase, two peroxidase domains DBLOX	SYNONYMOUS_CODING	573	191	P>P		0.88308	0.89621	0.86779	-	-	-		5.7971	69	ref		0	71	ref		1.31579	76	ref		0	61	ref		8.82353	68	ref		11.7647	68	C/T		12.3596	89	C/T		7.85714	140
supercont1.101:655730	G	A	Substitution	AAEL003933	AAEL003933-RA	Other detox	oxidase, two peroxidase domains DBLOX	NON_SYNONYMOUS_CODING	571	191	P>S		0.88445	0.88226	0.90487	-	-	-		100	67	A		100	71	A		100	79	A		100	53	A		100	70	A		100	69	A		100	90	A		100	141
supercont1.101:655758	G	A	Substitution	AAEL003933	AAEL003933-RA	Other detox	oxidase, two peroxidase domains DBLOX	SYNONYMOUS_CODING	543	181	S>S		0.86455	0.87826	0.88797	-	-	-		13.6842	95	ref		18.6813	91	A/G		17.5258	97	A/G		0	79	ref		0	84	ref		0	91	ref		0	93	ref		0	146
supercont1.101:655830	A	G	Substitution	AAEL003933	AAEL003933-RA	Other detox	oxidase, two peroxidase domains DBLOX	SYNONYMOUS_CODING	471	157	S>S		0.86858	0.89591	0.90065	-	-	-		50	76	A/G		43.617	94	A/G		40.1639	122	A/G		100	76	G		90.9091	99	G		84.2593	108	A/G		85.7143	112	A/G		89.1753	194
supercont1.101:655844	A	G	Substitution	AAEL003933	AAEL003933-RA	Other detox	oxidase, two peroxidase domains DBLOX	SYNONYMOUS_CODING	457	153	L>L		0.87488	0.81798	0.89263	Cayn; StGe	-	-		100	70	G		100	88	G		100	114	G		100	79	G		37.931	87	A/G		43.3962	106	A/G		37.931	116	A/G		46.6321	193
supercont1.101:655848	C	T	Substitution	AAEL003933	AAEL003933-RA	Other detox	oxidase, two peroxidase domains DBLOX	SYNONYMOUS_CODING	453	151	Q>Q		0.87274	0.89087	0.82739	-	-	-		0	70	ref		2.1978	91	ref		0	105	ref		0	75	ref		0	87	ref		0	107	ref		0.884956	113	ref		1.57068	191
supercont1.101:655869	T	A	Substitution	AAEL003933	AAEL003933-RA	Other detox	oxidase, two peroxidase domains DBLOX	SYNONYMOUS_CODING	432	144	L>L		0.89134	0.88841	0.90266	Nakh	-	-		16.9014	71	ref		6.74157	89	ref		7.84314	102	ref		31.9149	94	A/T		0	83	ref		0	111	ref		0.869565	115	ref		0.574713	174
supercont1.101:655929	C	T	Substitution	AAEL003933	AAEL003933-RA	Other detox	oxidase, two peroxidase domains DBLOX	SYNONYMOUS_CODING	372	124	S>S		0.8735	0.88509	0.8637	-	-	-		0	64	ref		0	70	ref		0	90	ref		0	73	ref		0	82	ref		0	83	ref		0.990099	101	ref		1.45985	137
supercont1.101:655953	C	T	Substitution	AAEL003933	AAEL003933-RA	Other detox	oxidase, two peroxidase domains DBLOX	SYNONYMOUS_CODING	348	116	A>A		0.86559	0.89087	0.89621	-	-	-		49.0196	51	C/T		50	58	C/T		48.4848	66	C/T		0	68	ref		4.16667	72	ref		7.04225	71	ref		11.4943	87	C/T		12.2642	106
supercont1.101:655965	T	C	Substitution	AAEL003933	AAEL003933-RA	Other detox	oxidase, two peroxidase domains DBLOX	SYNONYMOUS_CODING	336	112	P>P		0.64814	0.89226	0.90286	-	-	-		100	37	C		100	51	C		100	48	C		59.7015	67	C/T		27.9412	68	ref		34.3284	67	C/T		46.8354	79	C/T		48.4536	97
supercont1.101:656038	G	A	Substitution	AAEL003933	AAEL003933-RA	Other detox	oxidase, two peroxidase domains DBLOX	INTRONIC					0.88059	0.89591	0.88391	-	-	-		44.4444	45	A/G		40	80	A/G		54.7945	73	A/G		94	50	A		75	36	A/G		55.814	43	overlap		58.4615	65	A/G		59.4937	79
supercont1.101:656065	A	T	Substitution	AAEL003933	AAEL003933-RA	Other detox	oxidase, two peroxidase domains DBLOX	SPLICE_SITE					0.73888	0.89212	0.89329	-	-	-		0	76	ref		0	106	ref		0	88	ref		8.06452	62	ref		21.9512	41	ref		21.9512	41	A/T		3.38983	59	ref		13.8614	101
supercont1.101:656094	A	T	Substitution	AAEL003933	AAEL003933-RA	Other detox	oxidase, two peroxidase domains DBLOX	SYNONYMOUS_CODING	270	90	L>L		0.83034	0.84133	0.89785	-	-	-		23.3333	90	ref		23.2143	112	A/T		26.8041	97	A/T		61.3333	75	A/T		40.2778	72	A/T		29.1139	79	A/T		33.3333	81	A/T		39.3701	127
supercont1.101:656117	T	G	Substitution	AAEL003933	AAEL003933-RA	Other detox	oxidase, two peroxidase domains DBLOX	SYNONYMOUS_CODING	247	83	R>R		0.85521	0.89751	0.88909	-	-	-		100	97	G		100	116	G		100	95	G		100	80	G		53.6585	82	G/T		38.2979	94	G/T		65.9794	97	G/T		63.3333	150
supercont1.101:656154	G	A	Substitution	AAEL003933	AAEL003933-RA	Other detox	oxidase, two peroxidase domains DBLOX	SYNONYMOUS_CODING	210	70	G>G		0.88743	0.88375	0.86779	-	-	-		6.09756	82	ref		18.3673	98	A/G		4.71698	106	ref		0	84	ref		0	86	ref		0	113	ref		0	129	ref		0	170
supercont1.101:656160	T	G	Substitution	AAEL003933	AAEL003933-RA	Other detox	oxidase, two peroxidase domains DBLOX	SYNONYMOUS_CODING	204	68	A>A		0.8842	0.8862	0.89453	-	-	-		7.59494	79	ref		15.6863	102	G/T		8.49057	106	ref		0	87	ref		0	82	ref		0	105	ref		0	127	ref		0	169
supercont1.101:656181	C	T	Substitution	AAEL003933	AAEL003933-RA	Other detox	oxidase, two peroxidase domains DBLOX	SYNONYMOUS_CODING	183	61	P>P		0.88521	0.88262	0.88391	-	-	-		14.1026	78	ref		20.3883	103	C/T		16.2162	111	C/T		0	96	ref		0	88	ref		0	105	ref		0	121	ref		0	162
supercont1.101:656199	G	T	Substitution	AAEL003933	AAEL003933-RA	Other detox	oxidase, two peroxidase domains DBLOX	SYNONYMOUS_CODING	165	55	G>G		0.88366	0.85102	0.89234	-	-	-		36.3636	88	G/T		32.1101	109	G/T		41.3223	121	G/T		69.1589	107	G/T		34.4828	87	G/T		23.9669	121	G/T		33.9286	112	G/T		41.6667	156
supercont1.101:656204	C	T	Substitution	AAEL003933	AAEL003933-RA	Other detox	oxidase, two peroxidase domains DBLOX	NON_SYNONYMOUS_CODING	160	54	V>I		0.87838	0.89383	0.89815	-	-	-		0	80	ref		0	109	ref		0	111	ref		33.9623	106	C/T		0	81	ref		0	112	ref		0	103	ref		0	146
supercont1.101:656237	A	T	Substitution	AAEL003933	AAEL003933-RA	Other detox	oxidase, two peroxidase domains DBLOX	NON_SYNONYMOUS_CODING	127	43	S>T		0.8735	0.68995	0.87341	-	-	-		0	101	ref		0	84	ref		0	119	ref		10.7527	93	ref		17.4419	86	ref		14.2857	112	A/T		20.4819	83	A/T		29.5652	115
supercont1.101:656250	A	T	Substitution	AAEL003933	AAEL003933-RA	Other detox	oxidase, two peroxidase domains DBLOX	SYNONYMOUS_CODING	114	38	L>L		0.78676	0.86286	0.89938	StGe	-	-		100	93	T		100	76	T		100	119	T		100	82	T		36.7089	79	A/T		26.9231	104	A/T		51.0417	96	A/T		58.0357	112
supercont1.101:656259	A	G	Substitution	AAEL003933	AAEL003933-RA	Other detox	oxidase, two peroxidase domains DBLOX	SYNONYMOUS_CODING	105	35	R>R		0.80817	0.87729	0.89524	StGe	-	-		75.8242	91	A/G		69.863	73	A/G		84.2105	114	A/G		100	84	G		35.8974	78	A/G		29.8077	104	A/G		44.4444	90	A/G		57.7982	109
supercont1.101:656314	G	A	Substitution	AAEL003933	AAEL003933-RA	Other detox	oxidase, two peroxidase domains DBLOX	NON_SYNONYMOUS_CODING	50	17	T>I		0.88473	0.82547	0.89765	-	-	-		9.52381	63	ref		14.2857	56	A/G		20.2899	69	A/G		47.3684	57	A/G		22.5806	62	ref		18.1818	77	A/G		22.7273	66	A/G		30.7692	91
supercont1.101:656333	A	G	Substitution	AAEL003933	AAEL003933-RA	Other detox	oxidase, two peroxidase domains DBLOX	SPLICE_SITE					0.78292	0.80407	0.89248	StGe	-	-		100	45	G		100	45	G		100	45	G		100	36	G		23.4043	47	ref		21.5385	65	A/G		38.4615	39	A/G		43.75	64
supercont1.102:2263511	A	T	Substitution	AAEL003959	AAEL003959-RA	Other detox	short-chain dehydrogenase	3PRIME_UTR	1840				0.85238	0.90165	0.85642	-	-	-		0	47	ref		0	59	ref		0	57	ref		0	43	ref		7.5	40	ref		10.4167	48	ref		17.8571	56	A/T		10.1695	59
supercont1.102:2263534	C	CAA	Insertion	AAEL003959	AAEL003959-RA	Other detox	short-chain dehydrogenase	3PRIME_UTR	1816				na	na	na	-	na	-		0	59	ref		11.4943	87	C/CAA		7.69231	78	ref		0	54	ref		0	62	ref		0	59	ref		0	71	ref		0	85
supercont1.102:2263562	A	C	Substitution	AAEL003959	AAEL003959-RA	Other detox	short-chain dehydrogenase	3PRIME_UTR	1789				0.89647	0.86352	0.88	-	-	-		1.05263	95	ref		10.4762	105	A/C		12.766	94	A/C		0	85	ref		0	97	ref		0	92	ref		0	97	ref		0	128
supercont1.102:2263605	C	T	Substitution	AAEL003959	AAEL003959-RA	Other detox	short-chain dehydrogenase	3PRIME_UTR	1746				0.81146	0.8854	0.90207	-	-	-		0	117	ref		0	123	ref		0	126	ref		0	134	ref		0	121	ref		0	102	ref		0	111	ref		0	174
supercont1.102:2263608	G	A	Substitution	AAEL003959	AAEL003959-RA	Other detox	short-chain dehydrogenase	3PRIME_UTR	1743				0.88024	0.87969	0.90325	-	-	-		0	120	ref		0	123	ref		0	128	ref		0	141	ref		0	120	ref		0	100	ref		0	115	ref		0	184
supercont1.102:2263621	A	G	Substitution	AAEL003959	AAEL003959-RA	Other detox	short-chain dehydrogenase	3PRIME_UTR	1730				0.88059	0.87379	0.90148	-	-	-		0	109	ref		0	132	ref		0	136	ref		0	150	ref		0	123	ref		0	101	ref		0	109	ref		0	177
supercont1.102:2263635	T	G	Substitution	AAEL003959	AAEL003959-RA	Other detox	short-chain dehydrogenase	3PRIME_UTR	1716				0.88878	0.8854	0.87341	-	-	-		39.604	101	G/T		29.0076	131	G/T		21.1679	137	G/T		0	137	ref		0	112	ref		0	89	ref		0	122	ref		0	177
supercont1.102:2263650	C	T	Substitution	AAEL003959	AAEL003959-RA	Other detox	short-chain dehydrogenase	3PRIME_UTR	1701				0.89396	0.58401	0.89735	-	-	-		23.6559	93	ref		11.811	127	C/T		15.7143	140	C/T		20.6107	131	ref		19.3548	93	ref		15.8537	82	C/T		18.5841	113	C/T		19.5531	179
supercont1.102:2263654	T	C	Substitution	AAEL003959	AAEL003959-RA	Other detox	short-chain dehydrogenase	3PRIME_UTR	1697				0.89269	0.67597	0.90228	-	-	-		22.5806	93	ref		8.8	125	ref		15.6716	134	C/T		22.963	135	ref		16.4835	91	ref		16.2791	86	C/T		21.6667	120	C/T		18.5792	183
supercont1.102:2263657	C	T	Substitution	AAEL003959	AAEL003959-RA	Other detox	short-chain dehydrogenase	3PRIME_UTR	1694				0.89294	0.72906	0.88628	-	-	-		27.4725	91	ref		8.73016	126	ref		15.625	128	C/T		24.0876	137	ref		16.092	87	ref		16.2791	86	C/T		21.1864	118	C/T		18.0791	177
supercont1.102:2263662	T	A	Substitution	AAEL003959	AAEL003959-RA	Other detox	short-chain dehydrogenase	3PRIME_UTR	1689				0.89709	0.85655	0.87478	-	-	-		2.32558	86	ref		17.3228	127	A/T		10.6557	122	A/T		0	142	ref		0	90	ref		0	85	ref		0	127	ref		0	184
supercont1.102:2263670	G	A	Substitution	AAEL003959	AAEL003959-RA	Other detox	short-chain dehydrogenase	3PRIME_UTR	1681				0.88473	0.90338	0.8789	-	-	-		4.34783	92	ref		0.746269	134	ref		0	124	ref		0	141	ref		21.4286	98	ref		17.4419	86	A/G		24.8062	129	A/G		28.8043	184
supercont1.102:2263729	T	A	Substitution	AAEL003959	AAEL003959-RA	Other detox	short-chain dehydrogenase	3PRIME_UTR	1622				0.89582	0.89944	0.8821	-	-	-		23.9437	71	ref		10.1852	108	A/T		12.5	104	A/T		18.4783	92	ref		2.27273	88	diff		0	85	diff		7.27273	110	diff		10.6667	150
supercont1.102:2263729	T	G	Substitution	AAEL003959	AAEL003959-RA	Other detox	short-chain dehydrogenase	3PRIME_UTR	1622				0.89582	0.89944	0.8821	-	-	-		0	71	ref		0	108	diff		0	104	diff		0	92	ref		34.0909	88	G/T		30.5882	85	G/T		23.6364	110	G/T		20	150
supercont1.102:2263747	G	T	Substitution	AAEL003959	AAEL003959-RA	Other detox	short-chain dehydrogenase	3PRIME_UTR	1604				0.88024	0.86853	0.89276	Cayn; StGe	-	-		2.73973	73	ref		0	91	ref		0	95	ref		0	111	ref		54.5455	110	G/T		35.5556	90	G/T		45.7447	94	G/T		36.7188	128
supercont1.102:2263752	A	G	Substitution	AAEL003959	AAEL003959-RA	Other detox	short-chain dehydrogenase	3PRIME_UTR	1599				0.86455	0.88299	0.88516	-	-	-		2.85714	70	ref		6.66667	90	ref		4.12371	97	ref		6.36364	110	ref		0	116	ref		0	93	ref		2.35294	85	ref		7.75194	129
supercont1.102:2263762	A	AC	Insertion	AAEL003959	AAEL003959-RA	Other detox	short-chain dehydrogenase	3PRIME_UTR	1588				na	na	na	Cayn	na	-		58.209	67	A/AC		26.506	83	A/AC		35.1064	94	A/AC		0	101	ref		56.6038	106	A/AC		33.3333	99	A/AC		34.9398	83	A/AC		37.1212	132
supercont1.102:2263780	A	G	Substitution	AAEL003959	AAEL003959-RA	Other detox	short-chain dehydrogenase	3PRIME_UTR	1571				0.8789	0.87875	0.87478	-	-	-		13.6986	73	ref		8.79121	91	ref		4.90196	102	ref		8	100	ref		1.83486	109	ref		1.08696	92	ref		11.1111	81	A/G		8.63309	139
supercont1.102:2263784	A	C	Substitution	AAEL003959	AAEL003959-RA	Other detox	short-chain dehydrogenase	3PRIME_UTR	1567				0.84769	0.89981	0.86928	-	-	-		2.66667	75	ref		0	89	ref		0	108	ref		0	104	ref		15.0943	106	ref		4.25532	94	ref		15.1163	86	A/C		16.6667	138
supercont1.102:2263785	T	A	Substitution	AAEL003959	AAEL003959-RA	Other detox	short-chain dehydrogenase	3PRIME_UTR	1566				0.88635	0.89226	0.89301	-	-	-		10.3896	77	ref		0	88	ref		0	109	ref		0	107	ref		1.94175	103	ref		0	92	ref		2.38095	84	ref		2.89855	138
supercont1.102:2263806	G	A	Substitution	AAEL003959	AAEL003959-RA	Other detox	short-chain dehydrogenase	3PRIME_UTR	1545				0.82275	0.89307	0.89645	Cayn	-	-		2.24719	89	ref		0	102	ref		0	108	ref		0	101	ref		53.9326	89	A/G		41.9355	93	A/G		28.2353	85	A/G		35	140
supercont1.102:2263831	C	T	Substitution	AAEL003959	AAEL003959-RA	Other detox	short-chain dehydrogenase	3PRIME_UTR	1520				0.87419	0.90063	0.8816	-	-	-		0	76	ref		0	98	ref		0	99	ref		0	75	ref		30.4348	69	ref		28.125	64	C/T		12.3457	81	C/T		10	130
supercont1.102:2263854	C	A	Substitution	AAEL003959	AAEL003959-RA	Other detox	short-chain dehydrogenase	SYNONYMOUS_CODING	1497	318	V>V		0.89134	0.81933	0.89186	-	-	-		65.0794	63	A/C		42.8571	70	A/C		48.4848	66	A/C		18.75	64	ref		27.0833	48	ref		22.6415	53	A/C		36.6667	60	A/C		25.8824	85
supercont1.102:2263863	G	A	Substitution	AAEL003959	AAEL003959-RA	Other detox	short-chain dehydrogenase	SYNONYMOUS_CODING	1488	315	L>L		0.8667	0.89423	0.89442	-	-	-		0	57	ref		0	64	ref		0	51	ref		0	62	ref		10.4167	48	ref		4.25532	47	ref		12	50	A/G		20	80
supercont1.102:2263939	G	A	Substitution	AAEL003959	AAEL003959-RA	Other detox	short-chain dehydrogenase	INTRONIC					0.88799	0.8907	0.8984	-	-	-		15	40	ref		23.4375	64	A/G		24.4444	45	A/G		5.88235	68	ref		20	40	ref		5.66038	53	ref		32.4324	37	A/G		27.451	51
supercont1.102:2263954	G	A	Substitution	AAEL003959	AAEL003959-RA	Other detox	short-chain dehydrogenase	SPLICE_SITE					0.86333	0.86159	0.89703	-	-	-		16.2162	37	ref		22.3881	67	A/G		21.7391	46	A/G		5.97015	67	ref		16.6667	42	ref		5.88235	51	ref		29.2683	41	A/G		23.3333	60
supercont1.102:2264007	T	G	Substitution	AAEL003959	AAEL003959-RA	Other detox	short-chain dehydrogenase	SYNONYMOUS_CODING	1410	289	I>I		0.87978	0.85335	0.89712	-	-	-		17.2414	58	ref		16.1765	68	G/T		19.697	66	G/T		22.9885	87	ref		45.4545	88	G/T		44.0678	59	G/T		55.8442	77	G/T		50	100
supercont1.102:2264061	G	A	Substitution	AAEL003959	AAEL003959-RA	Other detox	short-chain dehydrogenase	SYNONYMOUS_CODING	1356	271	Y>Y		0.86207	0.89981	0.84871	-	-	-		0	104	ref		0	113	ref		0	129	ref		0	142	ref		14.3836	146	ref		9.3458	107	ref		17.1642	134	A/G		20.8333	168
supercont1.102:2264076	C	T	Substitution	AAEL003959	AAEL003959-RA	Other detox	short-chain dehydrogenase	SYNONYMOUS_CODING	1341	266	R>R		0.88799	0.89031	0.89894	-	-	-		23.7113	97	ref		15.5172	116	C/T		19.697	132	C/T		41.4966	147	C/T		12.1429	140	ref		22.2222	108	C/T		27.3973	146	C/T		25.9259	189
supercont1.102:2264103	T	C	Substitution	AAEL003959	AAEL003959-RA	Other detox	short-chain dehydrogenase	SYNONYMOUS_CODING	1314	257	P>P		0.86559	0.90121	0.699	-	-	-		24.6753	77	ref		19.7917	96	C/T		15.5963	109	C/T		0	128	ref		10.3175	126	ref		7.21649	97	ref		15.2672	131	C/T		20.5882	170
supercont1.102:2264145	G	T	Substitution	AAEL003959	AAEL003959-RA	Other detox	short-chain dehydrogenase	INTRONIC					0.84769	0.89944	0.70924	-	-	-		0	49	ref		0	58	ref		0	68	ref		0	84	ref		15.6863	102	ref		5.40541	74	ref		14.2857	77	G/T		22.314	121
supercont1.102:2270155	C	T	Substitution	AAEL003959	AAEL003959-RA	Other detox	short-chain dehydrogenase	SYNONYMOUS_CODING	1083	180	S>S		0.88963	0.82351	0.89315	-	-	-		22.1053	95	ref		8.64198	81	ref		18.9474	95	C/T		28.9157	83	ref		9.18367	98	ref		12.1212	99	C/T		14.7059	102	C/T		11.4286	140
supercont1.102:2270176	C	T	Substitution	AAEL003959	AAEL003959-RA	Other detox	short-chain dehydrogenase	SYNONYMOUS_CODING	1062	173	L>L		0.86455	0.87923	0.87779	-	-	-		6.25	96	ref		12.6437	87	C/T		9.32203	118	C/T		0	91	ref		0	104	ref		0	124	ref		0	107	ref		0	169
supercont1.102:2270230	G	A	Substitution	AAEL003959	AAEL003959-RA	Other detox	short-chain dehydrogenase	SYNONYMOUS_CODING	1008	155	R>R		0.8878	0.87875	0.87209	-	-	-		42.1488	121	A/G		34.4262	122	A/G		35.3742	147	A/G		0	93	ref		0	95	ref		0	130	ref		0	130	ref		0	175
supercont1.102:2270242	C	T	Substitution	AAEL003959	AAEL003959-RA	Other detox	short-chain dehydrogenase	SYNONYMOUS_CODING	996	151	V>V		0.89198	0.89725	0.88477	-	-	-		1.5748	127	ref		12.1951	123	C/T		11.0345	145	C/T		0	112	ref		10.7438	121	ref		11.6279	129	C/T		18.8976	127	C/T		25.4237	177
supercont1.102:2270290	C	A	Substitution	AAEL003959	AAEL003959-RA	Other detox	short-chain dehydrogenase	SYNONYMOUS_CODING	948	135	V>V		0.82275	0.89824	0.89398	-	-	-		0	120	ref		0	132	ref		0	163	ref		0	121	ref		11.194	134	ref		12.782	133	A/C		20.1299	154	A/C		17.0404	223
supercont1.102:2270379	C	A	Substitution	AAEL003959	AAEL003959-RA	Other detox	short-chain dehydrogenase	NON_SYNONYMOUS_CODING	859	106	V>F		0.89454	0.89156	0.88853	-	-	-		1.14943	87	ref		13.6842	95	A/C		9.3458	107	A/C		0	76	ref		0	105	ref		0	97	ref		0	101	ref		0	141
supercont1.102:2270383	T	A	Substitution	AAEL003959	AAEL003959-RA	Other detox	short-chain dehydrogenase	SYNONYMOUS_CODING	855	104	V>V		0.89017	0.88935	0.88933	Cayn	-	-		0	84	ref		0	89	diff		0	105	diff		0	75	ref		48.5714	105	A/T		21.2766	94	A/T		21.2121	99	A/T		24.6269	134
supercont1.102:2270383	T	C	Substitution	AAEL003959	AAEL003959-RA	Other detox	short-chain dehydrogenase	SYNONYMOUS_CODING	855	104	V>V		0.89017	0.88935	0.88933	-	-	-		1.19048	84	ref		13.4831	89	C/T		9.52381	105	C/T		0	75	ref		0	105	diff		0	94	diff		0	99	diff		0	134
supercont1.102:2283521	T	A	Substitution	AAEL003959	AAEL003959-RA	Other detox	short-chain dehydrogenase	INTRONIC					0.88936	0.90232	0.86853	-	-	-		0	38	ref		0	37	ref		0	48	ref		0	38	ref		26.1905	42	ref		7.69231	39	ref		7.01754	57	ref		17.3077	52
supercont1.102:2283582	G	A	Substitution	AAEL003959	AAEL003959-RA	Other detox	short-chain dehydrogenase	SYNONYMOUS_CODING	789	82	S>S		0.88609	0.87379	0.89081	-	-	-		42.5	40	A/G		29.3103	58	A/G		13.8889	72	A/G		0	67	ref		0	62	ref		0	52	ref		0	64	ref		0	95
supercont1.102:2283588	G	A	Substitution	AAEL003959	AAEL003959-RA	Other detox	short-chain dehydrogenase	SYNONYMOUS_CODING	783	80	N>N		0.89232	0.89751	0.88	-	-	-		18.4211	38	ref		4.91803	61	ref		17.3333	75	A/G		28.5714	63	ref		6.89655	58	ref		7.40741	54	ref		26.6667	60	A/G		35.4167	96
supercont1.102:2283591	T	C	Substitution	AAEL003959	AAEL003959-RA	Other detox	short-chain dehydrogenase	SYNONYMOUS_CODING	780	79	R>R		0.89175	0.86633	0.89218	-	-	-		15.625	32	ref		4.91803	61	ref		17.5676	74	C/T		0	62	ref		0	52	ref		0	52	ref		0	54	ref		8.60215	93
supercont1.102:2283597	C	T	Substitution	AAEL003959	AAEL003959-RA	Other detox	short-chain dehydrogenase	SYNONYMOUS_CODING	774	77	S>S		0.89443	0.90072	0.90276	-	-	-		31.7073	41	ref		61.5385	65	C/T		61.1111	72	C/T		0	66	ref		32.0755	53	ref		21.4286	56	C/T		21.8182	55	C/T		19.1489	94
supercont1.102:2283663	C	T	Substitution	AAEL003959	AAEL003959-RA	Other detox	short-chain dehydrogenase	SYNONYMOUS_CODING	708	55	A>A		0.78676	0.88338	0.90276	-	-	-		0	72	ref		0	76	ref		0	81	ref		0	88	ref		0	71	ref		0	82	ref		0	81	ref		0	131
supercont1.102:2283666	T	A	Substitution	AAEL003959	AAEL003959-RA	Other detox	short-chain dehydrogenase	SYNONYMOUS_CODING	705	54	G>G		0.88567	0.89145	0.88933	-	-	-		0	63	ref		0	74	ref		0	83	ref		0	77	ref		16.6667	66	ref		9.52381	84	ref		9.52381	84	A/T		8.33333	132
supercont1.102:2283669	G	A	Substitution	AAEL003959	AAEL003959-RA	Other detox	short-chain dehydrogenase	SYNONYMOUS_CODING	702	53	T>T		0.85953	0.89577	0.87209	-	-	-		0	68	ref		0	70	ref		0	83	ref		0	84	ref		14.0845	71	ref		10	80	ref		9.7561	82	A/G		9.16031	131
supercont1.102:2283681	C	G	Substitution	AAEL003959	AAEL003959-RA	Other detox	short-chain dehydrogenase	SYNONYMOUS_CODING	690	49	V>V		0.72207	0.89226	0.9047	-	-	-		87.3239	71	G		100	76	G		100	81	G		27.7108	83	ref		65.1515	66	C/G		50.6849	73	C/G		75	80	C/G		82.9268	123
supercont1.102:2283732	C	T	Substitution	AAEL003959	AAEL003959-RA	Other detox	short-chain dehydrogenase	INTRONIC					0.86455	0.87826	0.83436	Phet	-	-		74.4186	43	C/T		71.0526	38	C/T		84.2105	57	C/T		23.6111	72	ref		46.875	64	C/T		43.3962	53	C/T		61.2245	49	C/T		69.7674	86
supercont1.102:2283760	G	A	Substitution	AAEL003959	AAEL003959-RA	Other detox	short-chain dehydrogenase	INTRONIC					0.89232	0.88861	0.8949	-	-	-		18.1818	33	ref		3.125	32	ref		35.2941	34	A/G		13.5593	59	ref		0	67	ref		4.16667	48	ref		7.89474	38	ref		13.6986	73
supercont1.102:2283778	T	C	Substitution	AAEL003959	AAEL003959-RA	Other detox	short-chain dehydrogenase	INTRONIC					0.6122	0.90251	0.87662	Nakh	-	-		79.4872	39	C		100	48	C		97.6744	43	C		2.94118	68	ref		45.0704	71	C/T		48.9362	47	C/T		52.1739	46	C/T		69.0476	84
supercont1.102:2283781	G	A	Substitution	AAEL003959	AAEL003959-RA	Other detox	short-chain dehydrogenase	INTRONIC					0.58877	0.90251	0.89703	-	-	-		82	50	A		100	53	A		100	46	A		4.41176	68	ref		40.5797	69	A/G		44.6808	47	A/G		53.3333	45	A/G		72.2222	90
supercont1.102:2283825	T	C	Substitution	AAEL003959	AAEL003959-RA	Other detox	short-chain dehydrogenase	SYNONYMOUS_CODING	648	35	L>L		0.57499	0.90063	0.90286	Nakh	-	-		81.579	76	C		100	79	C		100	83	C		12.1951	82	ref		55.1402	107	C/T		58.4416	77	C/T		64.7727	88	C/T		85.3147	143
supercont1.102:2283849	G	A	Substitution	AAEL003959	AAEL003959-RA	Other detox	short-chain dehydrogenase	SYNONYMOUS_CODING	624	27	D>D		0.51434	0.90145	0.90336	Nakh	-	-		79.5181	83	A		100	84	A		100	96	A		14.8148	81	ref		59.2593	108	A/G		55.7143	70	A/G		70.2128	94	A/G		81.4286	140
supercont1.102:2283866	G	A	Substitution	AAEL003959	AAEL003959-RA	Other detox	short-chain dehydrogenase	SYNONYMOUS_CODING	607	22	L>L		0.8834	0.77891	0.88592	-	-	-		3.65854	82	ref		0	87	ref		0	110	ref		24.3902	82	ref		10.7843	102	ref		13.75	80	A/G		17.2043	93	A/G		29.927	137
supercont1.102:2283912	A	G	Substitution	AAEL003959	AAEL003959-RA	Other detox	short-chain dehydrogenase	SYNONYMOUS_CODING	561	6	N>N		0.86333	0.87055	0.8816	-	-	-		6.48148	108	ref		15.2542	118	A/G		6.57895	152	ref		0	127	ref		0	130	ref		0	103	ref		0	132	ref		0	200
supercont1.102:2284009	G	A	Substitution	AAEL003959	AAEL003959-RA	Other detox	short-chain dehydrogenase	5PRIME_UTR	464				0.88878	0.89674	0.89894	-	-	-		31.3726	102	A/G		48.1481	135	A/G		46.9388	147	A/G		0	141	ref		15.7895	152	ref		7.75194	129	ref		5.33333	150	ref		8.37004	227
supercont1.102:2284104	C	T	Substitution	AAEL003959	AAEL003959-RA	Other detox	short-chain dehydrogenase	5PRIME_UTR	369				0.88214	0.88338	0.86201	-	-	-		47.1698	53	C/T		35.8209	67	C/T		41.0959	73	C/T		0	115	ref		0	99	ref		0	94	ref		0	98	ref		0	150
supercont1.102:2284126	C	G	Substitution	AAEL003959	AAEL003959-RA	Other detox	short-chain dehydrogenase	ESSENTIAL_SPLICE_SITE					0.81146	0.90251	0.89905	-	-	-		0	41	ref		0	41	ref		0	33	ref		0	99	ref		19.1011	89	ref		11.9048	84	C/G		22.7848	79	C/G		19.6721	122
supercont1.102:2284128	G	A	Substitution	AAEL003959	AAEL003959-RA	Other detox	short-chain dehydrogenase	SPLICE_SITE					0.57751	0.89435	0.90394	-	-	-		80.5556	36	A		100	35	overlap		100	30	A		0	92	ref		12.7907	86	ref		9.7561	82	A/G		9.21053	76	ref		11.5702	121
supercont1.102:2284880	A	G	Substitution	AAEL003959	AAEL003959-RA	Other detox	short-chain dehydrogenase	INTRONIC					0.88963	0.87613	0.88	-	-	-		37.5	80	A/G		25.3333	75	A/G		35.2273	88	A/G		0	95	ref		0	89	ref		0	92	ref		0	103	ref		0	140
supercont1.102:2284895	GTA	G	Deletion	AAEL003959	AAEL003959-RA	Other detox	short-chain dehydrogenase	INTRONIC					na	na	na	-	na	-		15.7407	108	ref		18	100	G/GTA		20.1835	109	G/GTA		0	112	ref		0	105	ref		0.990099	101	ref		2.54237	118	ref		8.07453	161
supercont1.102:2284926	C	T	Substitution	AAEL003959	AAEL003959-RA	Other detox	short-chain dehydrogenase	INTRONIC					0.88181	0.87779	0.90544	-	-	-		0	135	ref		0	122	ref		0	121	ref		0	131	ref		0	119	ref		0	127	ref		0	129	ref		0	187
supercont1.102:2284951	G	A	Substitution	AAEL003959	AAEL003959-RA	Other detox	short-chain dehydrogenase	SPLICE_SITE					0.89163	0.87969	0.87836	-	-	-		33.0579	121	A/G		15.7895	95	A/G		24.2991	107	A/G		0	114	ref		0	119	ref		0	114	ref		0	105	ref		0	156
supercont1.102:2284967	A	G	Substitution	AAEL003959	AAEL003959-RA	Other detox	short-chain dehydrogenase	5PRIME_UTR	339				0.8667	0.88059	0.89735	-	-	-		17.5824	91	ref		14.6341	82	A/G		17.0213	94	A/G		0	84	ref		1	100	ref		1.86916	107	ref		2.17391	92	ref		9.92908	141
supercont1.102:2285042	A	G	Substitution	AAEL003959	AAEL003959-RA	Other detox	short-chain dehydrogenase	5PRIME_UTR	264				0.86858	0.90338	0.60505	-	-	-		0	53	ref		0	43	ref		0	45	ref		0	44	ref		13.3333	45	ref		13.7931	58	A/G		23.3333	60	A/G		9.58904	73
supercont1.102:2302255	T	A	Substitution	AAEL003961	AAEL003961-RA	Other detox	short-chain dehydrogenase	5PRIME_UTR	29				0.88366	0.88375	0.88766	-	-	-		28.866	97	A/T		25.9615	104	A/T		22.5	120	A/T		0	105	ref		0	126	ref		0	129	ref		0	125	ref		0	168
supercont1.102:2302288	A	G	Substitution	AAEL003961	AAEL003961-RA	Other detox	short-chain dehydrogenase	5PRIME_UTR	62				0.86455	0.82754	0.84436	-	-	-		94	50	G		100	39	G		100	49	G		51.4706	68	A/G		26.8293	82	ref		32.1429	84	A/G		32.6316	95	A/G		25	108
supercont1.102:2302336	G	T	Substitution	AAEL003961	AAEL003961-RA	Other detox	short-chain dehydrogenase	5PRIME_UTR	110				0.87126	0.85593	0.90075	-	-	-		0	52	ref		0	82	ref		0	57	ref		0	81	ref		0	90	ref		0	79	ref		0	103	ref		0	150
supercont1.102:2302338	T	C	Substitution	AAEL003961	AAEL003961-RA	Other detox	short-chain dehydrogenase	5PRIME_UTR	112				0.88921	0.89591	0.89234	-	-	-		26.3158	57	ref		44.9438	89	C/T		35	60	C/T		0	85	ref		12.5	88	ref		12.0482	83	C/T		7.84314	102	ref		9.15033	153
supercont1.102:2302352	G	A	Substitution	AAEL003961	AAEL003961-RA	Other detox	short-chain dehydrogenase	5PRIME_UTR	126				0.85521	0.82581	0.90406	-	-	-		30.6667	75	ref		24.7934	121	A/G		17.0732	82	A/G		14.5631	103	ref		19.3878	98	ref		12.7451	102	A/G		31.1475	122	A/G		19.6629	178
supercont1.102:2302357	T	A	Substitution	AAEL003961	AAEL003961-RA	Other detox	short-chain dehydrogenase	5PRIME_UTR	131				0.85953	0.88667	0.8821	-	-	-		8.23529	85	ref		13.1783	129	A/T		5.31915	94	ref		0	118	ref		0	115	ref		0	100	ref		0	121	ref		0	183
supercont1.102:2302361	G	A	Substitution	AAEL003961	AAEL003961-RA	Other detox	short-chain dehydrogenase	5PRIME_UTR	135				0.88891	0.67403	0.83798	-	-	-		5.74713	87	ref		0	137	ref		0	98	ref		21.8487	119	ref		13.2743	113	ref		10.7843	102	A/G		10.2362	127	A/G		6.73575	193
supercont1.102:2302375	AC	A	Deletion	AAEL003961	AAEL003961-RA	Other detox	short-chain dehydrogenase	5PRIME_UTR	150				na	na	na	-	na	-		0	105	A/C		0	162	A/C		0	114	A/C		28.2443	131	A/AC		0	134	A/C		0	115	A/C		0	142	A/C		0	197
supercont1.102:2302376	C	A	Substitution	AAEL003961	AAEL003961-RA	Other detox	short-chain dehydrogenase	5PRIME_UTR	150				0.88635	0.89383	0.90325	-	-	-		49.5238	105	A/C		39.5062	162	A/C		24.5614	114	A/C		5.34351	131	A/AC		28.3582	134	A/C		20	115	A/C		37.3239	142	A/C		25.3807	197
supercont1.102:2302421	T	C	Substitution	AAEL003961	AAEL003961-RA	Other detox	short-chain dehydrogenase	SYNONYMOUS_CODING	195	14	Y>Y		0.85087	0.88595	0.8772	-	-	-		37	100	C/T		32.8	125	C/T		21.4286	98	C/T		0	96	ref		0	114	ref		0	111	ref		0	127	ref		0	169
supercont1.102:2302437	T	A	Substitution	AAEL003961	AAEL003961-RA	Other detox	short-chain dehydrogenase	NON_SYNONYMOUS_CODING	211	20	L>M		0.86559	0.87253	0.88698	-	-	-		34.6939	98	A/T		31.9328	119	A/T		26.9231	78	A/T		0	92	ref		0	122	ref		0	116	ref		0	126	ref		0	165
supercont1.102:2302439	G	C	Substitution	AAEL003961	AAEL003961-RA	Other detox	short-chain dehydrogenase	NON_SYNONYMOUS_CODING	213	20	L>F		0.87613	0.90396	0.89999	-	-	-		28.866	97	C/G		34.4828	116	C/G		39.4737	76	C/G		0	94	ref		39.4958	119	C/G		26.2712	118	C/G		34.8837	129	C/G		33.1325	166
supercont1.102:2302479	C	T	Substitution	AAEL003961	AAEL003961-RA	Other detox	short-chain dehydrogenase	SYNONYMOUS_CODING	253	34	L>L		0.68581	0.77536	0.90394	-	-	-		68.254	63	C/T		98.2456	57	T		100	35	T		19.1919	99	ref		24.7525	101	ref		16.1616	99	C/T		18.1818	99	C/T		29.8701	154
supercont1.102:2302589	G	A	Substitution	AAEL003961	AAEL003961-RA	Other detox	short-chain dehydrogenase	SYNONYMOUS_CODING	297	48	V>V		0.70411	0.79738	0.9002	-	-	-		68.5185	54	A/G		98.2759	58	A		100	53	A		16	100	ref		19.8198	111	ref		22.0339	118	A/G		27.3684	95	A/G		31.7568	148
supercont1.102:2302664	T	C	Substitution	AAEL003961	AAEL003961-RA	Other detox	short-chain dehydrogenase	SYNONYMOUS_CODING	372	73	L>L		0.83512	0.88299	0.90094	-	-	-		0	130	ref		0	141	ref		0	130	ref		0.763359	131	ref		0	122	ref		0	134	ref		0	135	ref		0	192
supercont1.102:2302686	T	G	Substitution	AAEL003961	AAEL003961-RA	Other detox	short-chain dehydrogenase	NON_SYNONYMOUS_CODING	394	81	S>A		0.60118	0.86221	0.84376	-	-	-		14.7287	129	ref		0	138	ref		0	146	ref		45.8333	120	G/T		25	124	ref		17.0543	129	G/T		13.1783	129	G/T		5.91398	186
supercont1.102:2302697	A	G	Substitution	AAEL003961	AAEL003961-RA	Other detox	short-chain dehydrogenase	NON_SYNONYMOUS_CODING	405	84	I>M		0.71444	0.89145	0.84506	-	-	-		100	139	G		100	133	G		100	146	G		73.0769	104	A/G		86.2069	116	G		83.8983	118	A/G		68.0328	122	A/G		65.3409	176
supercont1.102:2302703	C	T	Substitution	AAEL003961	AAEL003961-RA	Other detox	short-chain dehydrogenase	SYNONYMOUS_CODING	411	86	V>V		0.76822	0.85391	0.85952	-	-	-		0	139	ref		0	138	ref		0	158	ref		22	100	ref		38.9381	113	C/T		39.8305	118	C/T		24.1935	124	C/T		16.2011	179
supercont1.102:2302727	G	T	Substitution	AAEL003961	AAEL003961-RA	Other detox	short-chain dehydrogenase	SYNONYMOUS_CODING	435	94	S>S		0.80268	0.88897	0.89409	-	-	-		22.0183	109	ref		22.3077	130	G/T		31.6129	155	G/T		0	89	ref		0	108	ref		1.72414	116	ref		6.14035	114	ref		6.98925	186
supercont1.102:2302748	C	T	Substitution	AAEL003961	AAEL003961-RA	Other detox	short-chain dehydrogenase	SYNONYMOUS_CODING	456	101	N>N		0.86333	0.69672	0.89556	-	-	-		0	112	ref		0	154	ref		0	167	ref		27.3585	106	ref		14.8438	128	ref		7.69231	104	ref		17.5439	114	C/T		8.58586	198
supercont1.102:2302751	C	T	Substitution	AAEL003961	AAEL003961-RA	Other detox	short-chain dehydrogenase	SYNONYMOUS_CODING	459	102	D>D		0.88394	0.83523	0.82582	-	-	-		4.38596	114	ref		12.2581	155	C/T		8.38323	167	C/T		25.4902	102	ref		39.0977	133	C/T		25.9615	104	C/T		24.7788	113	C/T		21.8274	197
supercont1.102:2302859	A	C	Substitution	AAEL003961	AAEL003961-RA	Other detox	short-chain dehydrogenase	SYNONYMOUS_CODING	567	138	G>G		0.85669	0.7451	0.76319	-	-	-		1.68067	119	ref		0	140	ref		0	143	ref		27.9279	111	ref		12.381	105	ref		18.1818	121	overlap		16.4179	134	overlap		30.3371	178
supercont1.102:2302865	T	A	Substitution	AAEL003961	AAEL003961-RA	Other detox	short-chain dehydrogenase	SYNONYMOUS_CODING	573	140	S>S		0.87613	0.89017	0.90286	-	-	-		0	111	ref		0	141	ref		0	145	ref		0	104	ref		0	106	ref		0	112	ref		0	139	ref		0	180
supercont1.102:2302883	C	T	Substitution	AAEL003961	AAEL003961-RA	Other detox	short-chain dehydrogenase	SYNONYMOUS_CODING	591	146	N>N		0.87549	0.88509	0.85223	-	-	-		37.7193	114	C/T		28.2443	131	C/T		24.3243	148	C/T		0	106	ref		0	105	ref		0	121	ref		0	136	ref		0	181
supercont1.102:2302886	C	T	Substitution	AAEL003961	AAEL003961-RA	Other detox	short-chain dehydrogenase	SYNONYMOUS_CODING	594	147	T>T		0.88799	0.87555	0.88797	-	-	-		38.0952	126	C/T		25.7812	128	C/T		21.831	142	C/T		0	107	ref		0	111	ref		0	124	ref		0	133	ref		0	185
supercont1.102:2302896	A	G	Substitution	AAEL003961	AAEL003961-RA	Other detox	short-chain dehydrogenase	NON_SYNONYMOUS_CODING	604	151	K>E		0.88142	0.89957	0.8917	-	-	-		0	113	ref		0	136	ref		0	131	ref		47.6636	107	A/G		0	106	ref		0	119	ref		0	131	ref		0	181
supercont1.102:2302907	G	A	Substitution	AAEL003961	AAEL003961-RA	Other detox	short-chain dehydrogenase	SYNONYMOUS_CODING	615	154	R>R		0.88394	0.87613	0.81758	-	-	-		0.833333	120	ref		0	127	ref		0	129	ref		21.6981	106	ref		6.60377	106	ref		17.9487	117	A/G		18.3099	142	A/G		24.2105	190
supercont1.102:2302936	T	A	Substitution	AAEL003961	AAEL003961-RA	Other detox	short-chain dehydrogenase	NON_SYNONYMOUS_CODING	644	164	V>D		0.8789	0.89661	0.88592	-	-	-		0	100	ref		0	113	ref		0	109	ref		0	99	ref		5.15464	97	ref		9.43396	106	A/T		25.2033	123	A/T		28.655	171
supercont1.102:2302976	A	G	Substitution	AAEL003961	AAEL003961-RA	Other detox	short-chain dehydrogenase	SYNONYMOUS_CODING	684	177	R>R		0.89483	0.87729	0.7741	-	-	-		32.2034	59	ref		13.3333	90	A/G		7.05882	85	ref		57.7465	71	A/G		18.5714	70	ref		25	84	A/G		26.9663	89	A/G		16.8	125
supercont1.102:2302982	A	T	Substitution	AAEL003961	AAEL003961-RA	Other detox	short-chain dehydrogenase	SYNONYMOUS_CODING	690	179	G>G		0.88906	0.84772	0.7732	-	-	-		23.4043	47	ref		12.6437	87	A/T		6.49351	77	ref		51.6129	62	A/T		16.6667	66	ref		26.9231	78	A/T		22.5	80	A/T		16.6667	120
supercont1.102:2302988	G	A	Substitution	AAEL003961	AAEL003961-RA	Other detox	short-chain dehydrogenase	SYNONYMOUS_CODING	696	181	Q>Q		0.88445	0.88687	0.81813	-	-	-		22.449	49	ref		13.75	80	A/G		7.69231	78	ref		57.1429	56	A/G		23.1884	69	ref		25.7576	66	A/G		18.9189	74	A/G		14.2857	105
supercont1.102:2303006	A	T	Substitution	AAEL003961	AAEL003961-RA	Other detox	short-chain dehydrogenase	SYNONYMOUS_CODING	714	187	T>T		0.88101	0.74118	0.88825	-	-	-		17.7778	45	ref		9.83606	61	ref		10	70	A/T		6.52174	46	ref		7.14286	56	ref		0	57	ref		4.16667	72	ref		7.61905	105
supercont1.102:2303054	G	C	Substitution	AAEL003961	AAEL003961-RA	Other detox	short-chain dehydrogenase	SYNONYMOUS_CODING	762	203	T>T		0.86559	0.89698	0.89376	-	-	-		0	43	ref		0	50	ref		0	58	ref		42.8571	35	C/G		0	61	ref		2.38095	42	ref		0	58	ref		0	69
supercont1.102:2318857	A	T	Substitution	AAEL003961	AAEL003961-RA	Other detox	short-chain dehydrogenase	NON_SYNONYMOUS_CODING	957	268	E>D		0.88635	0.87875	0.88	-	-	-		16.2791	43	ref		30	40	A/T		58.6207	58	A/T		0	37	ref		0	46	ref		0	54	ref		0	60	ref		0	80
supercont1.102:2318908	T	G	Substitution	AAEL003961	AAEL003961-RA	Other detox	short-chain dehydrogenase	SYNONYMOUS_CODING	1008	285	T>T		0.8878	0.8955	0.65991	-	-	-		30.9524	42	ref		18.5185	54	G/T		31.3726	51	G/T		53.3333	30	G/T		28.8889	45	ref		50	48	G/T		59.1837	49	G/T		70.8333	72
supercont1.102:2590185	C	T	Substitution	AAEL003958	AAEL003958-RA	Ion channel	neurotransmitter gated ion channel	SYNONYMOUS_CODING	87	29	G>G		0.89294	0.89102	0.88113	-	-	-		21.2121	33	ref		2.63158	38	ref		13.6364	44	C/T		1.85185	54	ref		26.3158	38	ref		41.9355	31	C/T		29.7872	47	C/T		44.4444	45
supercont1.102:2590368	C	T	Substitution	AAEL003958	AAEL003958-RA	Ion channel	neurotransmitter gated ion channel	INTRONIC					0.80586	0.89511	0.90159	-	-	-		0	49	ref		0	50	ref		0	49	ref		44.4444	45	C/T		0	39	ref		0	40	ref		0	68	ref		0	69
supercont1.102:2590583	G	A	Substitution	AAEL003958	AAEL003958-RA	Ion channel	neurotransmitter gated ion channel	SYNONYMOUS_CODING	306	102	S>S		0.88635	0.88509	0.7384	-	-	-		4.44444	90	ref		0	108	ref		0	149	ref		0	108	ref		0	92	ref		0	125	ref		0	119	ref		0	197
supercont1.102:2590596	A	G	Substitution	AAEL003958	AAEL003958-RA	Ion channel	neurotransmitter gated ion channel	SPLICE_SITE					0.83763	0.90314	0.86614	-	-	-		6.59341	91	ref		13	100	A/G		9.42029	138	A/G		0	104	ref		34.4828	87	A/G		27.6786	112	A/G		8.33333	108	ref		21.7143	175
supercont1.102:2590601	G	C	Substitution	AAEL003958	AAEL003958-RA	Ion channel	neurotransmitter gated ion channel	SPLICE_SITE					0.88308	0.90251	0.87944	-	-	-		4.65116	86	ref		12.9032	93	C/G		9.375	128	C/G		0	92	ref		35.443	79	C/G		27.451	102	C/G		10.6195	113	C/G		21.118	161
supercont1.102:2590609	A	G	Substitution	AAEL003958	AAEL003958-RA	Ion channel	neurotransmitter gated ion channel	INTRONIC					0.89258	0.8985	0.84436	-	-	-		42.029	69	A/G		26.506	83	A/G		37.069	116	A/G		0	82	ref		35.8209	67	A/G		23.4043	94	A/G		11.1111	108	A/G		19.4631	149
supercont1.102:2590642	C	T	Substitution	AAEL003958	AAEL003958-RA	Ion channel	neurotransmitter gated ion channel	INTRONIC					0.89269	0.88737	0.89329	-	-	-		27.2727	44	ref		11.3208	53	C/T		22.619	84	C/T		0	67	ref		0	63	ref		0	57	ref		0	88	ref		0	95
supercont1.102:2590657	C	T	Substitution	AAEL003958	AAEL003958-RA	Ion channel	neurotransmitter gated ion channel	INTRONIC					0.89338	0.86221	0.88516	-	-	-		22.2222	36	ref		4.54545	44	ref		20.7547	53	C/T		0	60	ref		0	50	ref		0	55	ref		0	70	ref		0	82
supercont1.102:2623799	T	G	Substitution	AAEL003958	AAEL003958-RA	Ion channel	neurotransmitter gated ion channel	INTRONIC					0.84588	0.83606	0.89785	-	-	-		19.6078	51	ref		17.9104	67	G/T		12.6984	63	G/T		27.9412	68	ref		8.69565	46	ref		9.67742	62	ref		17.1429	70	G/T		4.49438	89
supercont1.102:2623963	A	C	Substitution	AAEL003958	AAEL003958-RA	Ion channel	neurotransmitter gated ion channel	SYNONYMOUS_CODING	456	152	P>P		0.84198	0.61978	0.88766	-	-	-		66.1417	127	A/C		71.2329	146	A/C		66.6667	141	A/C		20.3008	133	ref		19.8113	106	ref		13.5593	118	A/C		18.8811	143	A/C		6.31579	190
supercont1.102:2624029	T	C	Substitution	AAEL003958	AAEL003958-RA	Ion channel	neurotransmitter gated ion channel	SYNONYMOUS_CODING	522	174	V>V		0.87126	0.78253	0.87079	-	-	-		67	100	C/T		67	100	C/T		66.6667	108	C/T		21.1111	90	ref		14.6667	75	ref		16.3265	98	C/T		9.90991	111	C/T		6.93642	173
supercont1.102:2624071	A	G	Substitution	AAEL003958	AAEL003958-RA	Ion channel	neurotransmitter gated ion channel	SYNONYMOUS_CODING	564	188	G>G		0.72207	0.85783	0.87542	-	-	-		4.7619	42	ref		7.8125	64	ref		16.6667	72	A/G		0	39	ref		0	38	ref		1.6129	62	ref		0	70	ref		0	106
supercont1.102:2624077	A	G	Substitution	AAEL003958	AAEL003958-RA	Ion channel	neurotransmitter gated ion channel	SYNONYMOUS_CODING	570	190	P>P		0.81735	0.87613	0.8917	-	-	-		4.25532	47	ref		7.93651	63	ref		18.6441	59	A/G		0	47	ref		0	39	ref		1.63934	61	ref		0	71	ref		0	105
supercont1.102:2624457	G	A	Substitution	AAEL003958	AAEL003958-RA	Ion channel	neurotransmitter gated ion channel	SYNONYMOUS_CODING	630	210	L>L		0.8834	0.90097	0.88592	-	-	-		41.8605	43	A/G		51.2821	39	A/G		41.1765	34	A/G		0	44	ref		21.875	32	ref		7.14286	42	ref		3.0303	33	ref		1.69492	59
supercont1.102:2624472	A	G	Substitution	AAEL003958	AAEL003958-RA	Ion channel	neurotransmitter gated ion channel	SYNONYMOUS_CODING	645	215	R>R		0.87126	0.86221	0.88477	-	-	-		25	36	ref		28.8889	45	A/G		27.907	43	A/G		0	47	ref		0	32	ref		0	47	ref		0	34	ref		0	69
supercont1.102:2624520	A	G	Substitution	AAEL003958	AAEL003958-RA	Ion channel	neurotransmitter gated ion channel	SYNONYMOUS_CODING	693	231	S>S		0.86207	0.89498	0.88825	-	-	-		50	50	A/G		49.0909	55	A/G		33.3333	48	A/G		40	60	A/G		24.4444	45	ref		7.69231	52	ref		4.54545	44	ref		0	84
supercont1.102:2624529	G	A	Substitution	AAEL003958	AAEL003958-RA	Ion channel	neurotransmitter gated ion channel	SYNONYMOUS_CODING	702	234	V>V		0.8869	0.90222	0.84681	-	-	-		15.3846	52	ref		0	56	ref		0	45	ref		0	60	ref		25	48	ref		8.16327	49	ref		6.38298	47	ref		1.21951	82
supercont1.102:2624536	C	T	Substitution	AAEL003958	AAEL003958-RA	Ion channel	neurotransmitter gated ion channel	SYNONYMOUS_CODING	709	237	L>L		0.89564	0.88338	0.89186	-	-	-		2.12766	47	ref		22.6415	53	C/T		0	42	ref		0	56	ref		0	50	ref		0	49	ref		0	48	ref		0	83
supercont1.102:2624565	G	T	Substitution	AAEL003958	AAEL003958-RA	Ion channel	neurotransmitter gated ion channel	SYNONYMOUS_CODING	738	246	L>L		0.88248	0.82924	0.87209	-	-	-		48.8889	45	G/T		45.8333	48	G/T		41.0256	39	G/T		20.3704	54	ref		3.50877	57	ref		4.08163	49	ref		4.34783	46	ref		1.25	80
supercont1.102:2624759	T	C	Substitution	AAEL003958	AAEL003958-RA	Ion channel	neurotransmitter gated ion channel	SYNONYMOUS_CODING	852	284	D>D		0.88101	0.80407	0.88	-	-	-		54.8387	62	C/T		49.0566	53	C/T		33.3333	51	C/T		21.3115	61	ref		13.2075	53	ref		20	40	C/T		7.69231	39	ref		14.4737	76
supercont1.102:2624828	G	A	Substitution	AAEL003958	AAEL003958-RA	Ion channel	neurotransmitter gated ion channel	SYNONYMOUS_CODING	921	307	L>L		0.79006	0.88226	0.88391	-	-	-		9.58904	73	ref		11.2676	71	A/G		15.942	69	A/G		0	84	ref		0	75	ref		0	45	ref		0	59	ref		0	102
supercont1.102:2624906	G	A	Substitution	AAEL003958	AAEL003958-RA	Ion channel	neurotransmitter gated ion channel	SYNONYMOUS_CODING	999	333	Q>Q		0.87199	0.80029	0.87836	-	-	-		78.75	80	A		69.1358	81	A/G		66.2791	86	A/G		28.75	80	ref		23.2877	73	ref		16.9014	71	A/G		14.2857	70	A/G		17.7419	124
supercont1.102:2624945	C	T	Substitution	AAEL003958	AAEL003958-RA	Ion channel	neurotransmitter gated ion channel	SYNONYMOUS_CODING	1038	346	N>N		0.8767	0.90154	0.87662	-	-	-		59.1549	71	C/T		56.5789	76	C/T		58.209	67	C/T		0	67	ref		38.4615	52	C/T		32.7869	61	C/T		22.6667	75	C/T		37.2549	102
supercont1.102:2624972	A	T	Substitution	AAEL003958	AAEL003958-RA	Ion channel	neurotransmitter gated ion channel	SYNONYMOUS_CODING	1065	355	T>T		0.88142	0.89278	0.87209	-	-	-		16.3934	61	ref		15.2542	59	A/T		12.6984	63	A/T		38.2979	47	ref		10	40	ref		0	54	ref		1.6129	62	ref		5.88235	102
supercont1.102:2624990	A	G	Substitution	AAEL003958	AAEL003958-RA	Ion channel	neurotransmitter gated ion channel	SYNONYMOUS_CODING	1083	361	Q>Q		0.89757	0.78137	0.88825	-	-	-		75.7576	66	A/G		53.7313	67	A/G		41.5385	65	A/G		22.4138	58	ref		13.1148	61	ref		2.12766	47	ref		9.83606	61	ref		12.931	116
supercont1.102:2624997	C	T	Substitution	AAEL003958	AAEL003958-RA	Ion channel	neurotransmitter gated ion channel	SYNONYMOUS_CODING	1090	364	L>L		0.89186	0.85836	0.86036	-	-	-		1.5873	63	ref		15	60	C/T		4.22535	71	ref		1.6129	62	ref		0	61	ref		0	50	ref		0	63	ref		0	121
supercont1.102:2625005	T	C	Substitution	AAEL003958	AAEL003958-RA	Ion channel	neurotransmitter gated ion channel	SYNONYMOUS_CODING	1098	366	G>G		0.89647	0.88568	0.88766	-	-	-		28.5714	49	ref		4.91803	61	ref		0	69	ref		0	55	ref		5.26316	57	ref		1.75439	57	ref		4.7619	63	ref		9.09091	121
supercont1.1022:236408	A	T	Substitution	AAEL014162	AAEL014162-RA	Ion channel	potassium channel kcnq,	INTRONIC					0.89134	0.88687	0.90521	-	-	-		81.25	32	T		69.5652	46	A/T		69.697	33	A/T		100	40	T		86.8421	38	T		80.9524	42	A/T		93.0233	43	T		98.0392	51
supercont1.1022:236423	C	A	Substitution	AAEL014162	AAEL014162-RA	Ion channel	potassium channel kcnq,	INTRONIC					0.88181	0.89944	0.88349	-	-	-		54.054	37	A/C		40	50	A/C		45.9459	37	A/C		0	49	ref		10.6383	47	ref		6.38298	47	ref		21.5686	51	A/C		19.697	66
supercont1.1022:236451	T	G	Substitution	AAEL014162	AAEL014162-RA	Ion channel	potassium channel kcnq,	INTRONIC					0.79974	0.89264	0.90359	-	-	-		77.9661	59	G/T		76.0563	71	G/T		74.5763	59	G/T		100	62	G		92.0635	63	G		75.7576	66	G/T		95.6522	69	G		95.2941	85
supercont1.1022:236469	T	C	Substitution	AAEL014162	AAEL014162-RA	Ion channel	potassium channel kcnq,	INTRONIC					0.88181	0.89725	0.88305	-	-	-		26.087	69	ref		24.6914	81	C/T		11.4754	61	C/T		0	68	ref		23.4568	81	ref		14.9254	67	C/T		4.70588	85	ref		11.4583	96
supercont1.1022:236629	C	A	Substitution	AAEL014162	AAEL014162-RA	Ion channel	potassium channel kcnq,	INTRONIC					0.88672	0.89196	0.90325	-	-	-		46.6667	60	A/C		37.2093	86	A/C		42.2222	45	A/C		100	57	A		63.1579	57	A/C		73.0159	63	A/C		87.6712	73	A/C		81.1594	69
supercont1.1022:242246	A	G	Substitution	AAEL014162	AAEL014162-RA	Ion channel	potassium channel kcnq,	SYNONYMOUS_CODING	409	128	V>V		0.83763	0.89738	0.88933	-	-	-		100	55	G		100	48	G		100	58	G		100	50	G		98.0769	52	G		86.5385	52	A/G		94.9153	59	G		100	83
supercont1.1036:96647	T	A	Substitution	AAEL014208	AAEL014208-RA	P450	cytochrome P450 CYP307B?	INTRONIC					0.89348	0.87729	0.876	-	-	-		94.1176	51	A		100	52	A		100	64	A		100	59	A		100	54	A		100	54	A		100	48	A		100	78
supercont1.104:448083	G	A	Substitution	AAEL003991	AAEL003991-RB	Other detox	alcohol dehydrogenase	3PRIME_UTR	1695				0.8256	0.90109	0.89938	-	-	-		0	64	ref		0	109	ref		0	63	ref		0	63	ref		10.1266	79	ref		17.1429	70	A/G		33.7079	89	A/G		25.8427	89
supercont1.104:448110	A	T	Substitution	AAEL003991	AAEL003991-RB	Other detox	alcohol dehydrogenase	3PRIME_UTR	1668				0.8895	0.90421	0.89138	-	-	-		10.6061	66	ref		0	113	ref		0	74	ref		18.9189	74	ref		36.7089	79	A/T		7.95455	88	ref		4.16667	96	ref		7.44681	94
supercont1.104:448174	G	A	Substitution	AAEL003991	AAEL003991-RB	Other detox	alcohol dehydrogenase	3PRIME_UTR	1604				0.87274	0.89957	0.88698	-	-	-		26.087	92	ref		19.084	131	A/G		30.7692	91	A/G		69.3333	75	A/G		10.101	99	ref		3.75	80	ref		3.36134	119	ref		4.03226	124
supercont1.104:448231	A	C	Substitution	AAEL003991	AAEL003991-RB	Other detox	alcohol dehydrogenase	3PRIME_UTR	1547				0.85953	0.88968	0.84308	-	-	-		31.8584	113	A/C		36.129	155	A/C		36.3636	110	A/C		0	111	ref		0	130	ref		0	116	ref		0	130	ref		0	165
supercont1.104:448253	T	A	Substitution	AAEL003991	AAEL003991-RB	Other detox	alcohol dehydrogenase	3PRIME_UTR	1525				0.57499	0.89813	0.89513	-	-	-		18.8034	117	ref		0	144	ref		0	103	ref		24.5614	114	ref		34	150	A/T		16.2963	135	A/T		9.79021	143	A/T		13.125	160
supercont1.104:448282	A	G	Substitution	AAEL003991	AAEL003991-RB	Other detox	alcohol dehydrogenase	3PRIME_UTR	1496				0.8492	0.89981	0.88797	-	-	-		56.3492	126	A/G		57.1429	140	A/G		57.7586	116	A/G		24.4094	127	ref		30.3448	145	A/G		10.3448	145	A/G		8.43374	166	ref		12.7168	173
supercont1.104:448291	G	C	Substitution	AAEL003991	AAEL003991-RB	Other detox	alcohol dehydrogenase	3PRIME_UTR	1487				0.83763	0.89368	0.857	-	-	-		0	132	ref		0	138	ref		0	118	ref		28.8136	118	C/G		0	143	ref		0.675676	148	ref		0	166	ref		0	165
supercont1.104:448339	G	A	Substitution	AAEL003991	AAEL003991-RB	Other detox	alcohol dehydrogenase	3PRIME_UTR	1439				0.80586	0.86286	0.87836	-	-	-		11.7117	111	ref		11.8343	169	A/G		18.705	139	A/G		0	106	ref		0	99	ref		0	130	ref		0	152	ref		0	162
supercont1.104:448362	T	C	Substitution	AAEL003991	AAEL003991-RB	Other detox	alcohol dehydrogenase	SYNONYMOUS_CODING	1416	472	R>R		0.77437	0.87729	0.79684	-	-	-		54.2373	118	C/T		57.1429	168	C/T		47.7273	132	C/T		8.69565	115	ref		15.1261	119	ref		5.22388	134	ref		3.44828	145	ref		5.23256	172
supercont1.104:448468	T	A	Substitution	AAEL003991	AAEL003991-RB	Other detox	alcohol dehydrogenase	INTRONIC					0.88101	0.86159	0.85878	-	-	-		34.7826	138	A/T		39.6552	116	A/T		37.3832	107	A/T		0	105	ref		0	130	ref		0	131	ref		0	139	ref		0	181
supercont1.104:448714	G	A	Substitution	AAEL003991	AAEL003991-RB	Other detox	alcohol dehydrogenase	SYNONYMOUS_CODING	1128	376	I>I		0.86559	0.88986	0.88552	-	-	-		10.6509	169	ref		16.3743	171	A/G		11.7647	187	A/G		0	192	ref		0	198	ref		0	193	ref		0	184	ref		0	254
supercont1.104:448732	C	G	Substitution	AAEL003991	AAEL003991-RB	Other detox	alcohol dehydrogenase	SYNONYMOUS_CODING	1110	370	T>T		0.89639	0.89251	0.87276	-	-	-		75.4601	163	C/G		93.2203	177	G		97.1264	174	G		100	175	G		48.9362	188	C/G		30.7692	182	C/G		48.2558	172	C/G		42.6778	239
supercont1.104:448766	G	C	Substitution	AAEL003991	AAEL003991-RB	Other detox	alcohol dehydrogenase	NON_SYNONYMOUS_CODING	1076	359	A>G		0.89573	0.90063	0.87779	-	-	-		27.0588	170	C/G		10.4167	192	C/G		1.79641	167	ref		0	150	ref		12.4224	161	ref		6.55738	183	ref		3.61446	166	ref		3.71901	242
supercont1.104:448804	G	A	Substitution	AAEL003991	AAEL003991-RB	Other detox	alcohol dehydrogenase	SYNONYMOUS_CODING	1038	346	R>R		0.85521	0.8985	0.67447	-	-	-		14.7887	142	ref		0	180	ref		0	154	ref		21.7054	129	ref		31.8182	132	A/G		17.3077	156	A/G		8.33333	168	A/G		15.1261	238
supercont1.104:448920	T	C	Substitution	AAEL003991	AAEL003991-RB	Other detox	alcohol dehydrogenase	INTRONIC					0.89163	0.90421	0.75624	StGe	-	-		54.5455	88	C/T		40.5797	138	C/T		56.9767	86	C/T		75.2475	101	C/T		36.25	80	C/T		13.9535	86	C/T		11.7021	94	C/T		16.9118	136
supercont1.104:448922	A	G	Substitution	AAEL003991	AAEL003991-RB	Other detox	alcohol dehydrogenase	INTRONIC					0.85953	0.89786	0.7856	-	-	-		15.1163	86	ref		0	134	ref		0	83	ref		37	100	A/G		36.8421	76	A/G		13.4146	82	A/G		11.828	93	A/G		14.2857	133
supercont1.104:448975	A	G	Substitution	AAEL003991	AAEL003991-RB	Other detox	alcohol dehydrogenase	INTRONIC					0.89408	0.89577	0.89351	-	-	-		30.7692	52	ref		8.4507	71	ref		2.17391	46	ref		0	63	ref		11.3208	53	ref		1.88679	53	ref		6.17284	81	ref		2.32558	86
supercont1.104:455971	G	A	Substitution	AAEL003991	AAEL003991-RB	Other detox	alcohol dehydrogenase	SYNONYMOUS_CODING	934	312	L>L		0.88878	0.90189	0.88853	-	-	-		24.3243	37	ref		7.5	40	ref		12.1212	33	ref		28.2051	39	ref		47.0588	34	A/G		20.5128	39	A/G		6.97674	43	ref		11.7647	51
supercont1.104:456089	T	A	Substitution	AAEL003991	AAEL003991-RB	Other detox	alcohol dehydrogenase	SYNONYMOUS_CODING	816	272	R>R		0.85087	0.87729	0.86454	-	-	-		35.2273	88	A/T		28.972	107	A/T		25.7732	97	A/T		0	94	ref		0	94	ref		0	84	ref		0	97	ref		0	163
supercont1.104:456161	G	T	Substitution	AAEL003991	AAEL003991-RB	Other detox	alcohol dehydrogenase	SYNONYMOUS_CODING	744	248	P>P		0.83512	0.90036	0.89851	-	-	-		0	127	ref		0	150	ref		0	143	ref		0	146	ref		10.687	131	ref		15.5738	122	G/T		35.7664	137	G/T		21.9731	223
supercont1.104:456266	G	A	Substitution	AAEL003991	AAEL003991-RB	Other detox	alcohol dehydrogenase	SYNONYMOUS_CODING	639	213	S>S		0.87978	0.86707	0.88056	-	-	-		8.09248	173	ref		16.9725	218	A/G		17.1717	198	A/G		0	201	ref		0	190	ref		0	191	ref		0	199	ref		0	309
supercont1.104:456268	A	C	Substitution	AAEL003991	AAEL003991-RB	Other detox	alcohol dehydrogenase	NON_SYNONYMOUS_CODING	637	213	S>A		0.89147	0.9053	0.84308	-	-	-		15.7303	178	ref		30.3738	214	A/C		33.8308	201	A/C		19.6078	204	ref		9.57447	188	ref		14.433	194	A/C		39.4872	195	A/C		21.1039	308
supercont1.104:456308	T	C	Substitution	AAEL003991	AAEL003991-RB	Other detox	alcohol dehydrogenase	SYNONYMOUS_CODING	597	199	S>S		0.8885	0.90508	0.89743	StGe	-	-		45.0867	173	C/T		32	200	C/T		29.6089	179	C/T		74.7312	186	C/T		39.3617	188	C/T		21.3904	187	C/T		8.85417	192	C/T		17.9153	307
supercont1.104:456344	A	C	Substitution	AAEL003991	AAEL003991-RB	Other detox	alcohol dehydrogenase	SYNONYMOUS_CODING	561	187	S>S		0.8767	0.90481	0.88305	-	-	-		42.5	200	A/C		31.2821	195	A/C		27.0408	196	A/C		26.2911	213	A/C		34.4828	203	A/C		18.9944	179	A/C		7.8125	192	ref		17	300
supercont1.104:456389	G	A	Substitution	AAEL003991	AAEL003991-RB	Other detox	alcohol dehydrogenase	SYNONYMOUS_CODING	516	172	Y>Y		0.87126	0.89522	0.88113	-	-	-		0	178	ref		0.581395	172	ref		0	209	ref		53.4653	202	A/G		0	179	ref		1.14943	174	ref		0.564972	177	ref		1.73611	288
supercont1.104:456434	T	A	Substitution	AAEL003991	AAEL003991-RB	Other detox	alcohol dehydrogenase	SYNONYMOUS_CODING	471	157	I>I		0.55299	0.89906	0.8917	-	-	-		18.9349	169	ref		0	159	ref		0	205	ref		21.5789	190	ref		26.6234	154	ref		15.1515	165	A/T		6.62983	181	ref		12.5523	239
supercont1.104:456455	C	A	Substitution	AAEL003991	AAEL003991-RB	Other detox	alcohol dehydrogenase	SYNONYMOUS_CODING	450	150	L>L		0.86207	0.89535	0.89453	-	-	-		19.3182	176	ref		9.93378	151	A/C		6.87831	189	ref		19.1011	178	ref		25.5639	133	ref		14.2857	161	A/C		7.10059	169	ref		13.4783	230
supercont1.104:456497	C	T	Substitution	AAEL003991	AAEL003991-RB	Other detox	alcohol dehydrogenase	SYNONYMOUS_CODING	408	136	E>E		0.88799	0.89131	0.89101	-	-	-		0	128	ref		0.645161	155	ref		0	161	ref		45.8065	155	C/T		0	120	ref		0	149	ref		0	134	ref		2.7027	222
supercont1.104:456691	A	T	Substitution	AAEL003991	AAEL003991-RB	Other detox	alcohol dehydrogenase	INTRONIC					0.85953	0.86633	0.88698	-	-	-		14.1176	85	ref		21.0526	57	A/T		18.9655	58	A/T		0	95	ref		0	73	ref		0	88	ref		0	85	ref		0	127
supercont1.104:456699	G	A	Substitution	AAEL003991	AAEL003991-RB	Other detox	alcohol dehydrogenase	INTRONIC					0.88024	0.90176	0.90167	-	-	-		2.32558	86	ref		8.33333	60	ref		12.5	64	A/G		0	94	ref		5.47945	73	ref		9.1954	87	A/G		19.5402	87	A/G		16.9231	130
supercont1.104:456709	T	A	Substitution	AAEL003991	AAEL003991-RB	Other detox	alcohol dehydrogenase	INTRONIC					0.89017	0.8932	0.89793	-	-	-		4	75	ref		11.5942	69	A/T		11.7647	68	A/T		0	96	ref		5.06329	79	ref		8.98876	89	ref		17.8571	84	A/T		15.0794	126
supercont1.104:456737	A	G	Substitution	AAEL003991	AAEL003991-RB	Other detox	alcohol dehydrogenase	INTRONIC					0.89032	0.90085	0.88349	-	-	-		7.79221	77	ref		19.3182	88	A/G		15.5844	77	A/G		0	108	ref		6.17284	81	ref		8.33333	84	ref		16.8539	89	A/G		16.4286	140
supercont1.104:456739	A	G	Substitution	AAEL003991	AAEL003991-RB	Other detox	alcohol dehydrogenase	SPLICE_SITE					0.88834	0.89661	0.89556	-	-	-		8	75	ref		18.1818	88	A/G		16.2162	74	A/G		0	108	ref		3.75	80	ref		7.5	80	ref		18.8889	90	A/G		17.3913	138
supercont1.104:456852	C	T	Substitution	AAEL003991	AAEL003991-RB	Other detox	alcohol dehydrogenase	SYNONYMOUS_CODING	117	39	A>A		0.89057	0.89331	0.88349	-	-	-		61.7886	123	C/T		74.3421	152	C/T		79.4118	136	C/T		100	122	T		44.2029	138	C/T		33.9286	112	C/T		46.2687	134	C/T		44.9761	209
supercont1.104:456888	G	A	Substitution	AAEL003991	AAEL003991-RB	Other detox	alcohol dehydrogenase	SYNONYMOUS_CODING	81	27	D>D		0.54065	0.90338	0.89138	-	-	-		20.202	99	ref		0	138	ref		0	118	ref		28	100	ref		37.6068	117	A/G		19.5652	92	A/G		9.62963	135	A/G		17.8161	174
supercont1.104:456907	T	G	Substitution	AAEL003991	AAEL003991-RB	Other detox	alcohol dehydrogenase	SPLICE_SITE					0.8967	0.89786	0.89535	-	-	-		88.5057	87	G		64.7541	122	G/T		62.963	108	G/T		100	106	G		90.0901	111	G		87.3684	95	G/T		65.5462	119	G/T		71.3415	164
supercont1.104:456920	A	G	Substitution	AAEL003991	AAEL003991-RB	Other detox	alcohol dehydrogenase	INTRONIC					0.89483	0.90097	0.90406	-	-	-		85.8696	92	G		62.3077	130	A/G		60.8696	115	A/G		100	119	G		89.2857	112	G		87.037	108	A/G		64.3478	115	A/G		70.1987	151
supercont1.104:456937	T	C	Substitution	AAEL003991	AAEL003991-RB	Other detox	alcohol dehydrogenase	INTRONIC					0.72569	0.89577	0.89712	-	-	-		50	92	C/T		48.3871	124	C/T		48.5714	105	C/T		0	120	ref		47.3684	114	C/T		61.2613	111	C/T		47.7478	111	C/T		55.1948	154
supercont1.104:456943	C	T	Substitution	AAEL003991	AAEL003991-RB	Other detox	alcohol dehydrogenase	INTRONIC					0.80817	0.87379	0.87276	-	-	-		18.6274	102	ref		16.9355	124	C/T		18.8119	101	C/T		0	119	ref		0	120	ref		0	116	ref		0.925926	108	ref		0	154
supercont1.104:456956	T	A	Substitution	AAEL003991	AAEL003991-RB	Other detox	alcohol dehydrogenase	INTRONIC					0.82791	0.87253	0.8789	-	-	-		20.1923	104	ref		18.3333	120	A/T		22.3301	103	A/T		0	126	ref		0	127	ref		0	126	ref		0	114	ref		0	168
supercont1.104:457122	T	G	Substitution	AAEL003991	AAEL003991-RC	Other detox	alcohol dehydrogenase	5PRIME_UTR	728				0.87549	0.87875	0.88	-	-	-		8.33333	108	ref		13.2353	136	G/T		17.9104	134	G/T		0	131	ref		0	157	ref		0	107	ref		0	120	ref		0	184
supercont1.104:457335	C	A	Substitution	AAEL003991	AAEL003991-RC	Other detox	alcohol dehydrogenase	INTRONIC					0.88635	0.67319	0.77906	-	-	-		13.3333	75	ref		10.7143	84	ref		9.30232	86	ref		30.6452	62	ref		29.6296	81	ref		24.3902	82	A/C		28.7671	73	A/C		19.5652	92
supercont1.104:457338	T	G	Substitution	AAEL003991	AAEL003991-RC	Other detox	alcohol dehydrogenase	INTRONIC					0.8256	0.71805	0.73606	-	-	-		13.924	79	ref		14.1176	85	G/T		15.3846	91	G/T		34.375	64	G/T		36.0465	86	G/T		31.4607	89	G/T		33.8235	68	G/T		26.5957	94
supercont1.104:457341	CA	C	Deletion	AAEL003991	AAEL003991-RC	Other detox	alcohol dehydrogenase	INTRONIC					na	na	na	-	na	-		16.4557	79	ref		16.6667	84	C/CA		15.5556	90	C/CA		32.3529	68	C/CA		35.8696	92	C/CA		31.8182	88	C/CA		31.9444	72	C/CA		27.3684	95
supercont1.104:457385	C	T	Substitution	AAEL003991	AAEL003991-RC	Other detox	alcohol dehydrogenase	INTRONIC					0.89258	0.88015	0.85419	-	-	-		4.54545	110	ref		15.7895	133	C/T		18.5484	124	C/T		0	100	ref		0	131	ref		0	118	ref		0	106	ref		0	144
supercont1.104:457496	GCA	G	Deletion	AAEL003991	AAEL003991-RC	Other detox	alcohol dehydrogenase	5PRIME_UTR	597				na	na	na	-	na	-		19.2982	57	ref		11.2069	116	G/GCA		17.9245	106	G/GCA		82.5	40	G/GCA		47.0588	68	G/GCA		56.9444	72	G/GCA		58.8235	68	G/GCA		52.4753	101
supercont1.104:457516	A	C	Substitution	AAEL003991	AAEL003991-RC	Other detox	alcohol dehydrogenase	5PRIME_UTR	579				0.87783	0.89893	0.89631	-	-	-		25.7143	70	ref		18.5185	108	A/C		19.6078	102	A/C		100	39	C		63.6364	66	A/C		66.6667	63	A/C		70.6897	58	A/C		63.2911	79
supercont1.104:457522	C	T	Substitution	AAEL003991	AAEL003991-RC	Other detox	alcohol dehydrogenase	5PRIME_UTR	573				0.88366	0.89866	0.86201	-	-	-		16.4557	79	ref		10.4348	115	C/T		10.101	99	ref		26.1905	42	ref		20.5882	68	ref		19.0476	63	C/T		1.63934	61	ref		7.14286	84
supercont1.104:457537	A	C	Substitution	AAEL003991	AAEL003991-RC	Other detox	alcohol dehydrogenase	5PRIME_UTR	558				0.85669	0.90085	0.89081	-	-	-		47.3118	93	A/C		46.6667	120	A/C		45.5446	101	A/C		100	50	C		67.5	80	A/C		73.8461	65	A/C		72.8814	59	A/C		60.8696	92
supercont1.104:457543	C	CT	Insertion	AAEL003991	AAEL003991-RC	Other detox	alcohol dehydrogenase	5PRIME_UTR	551				na	na	na	-	na	-		1.33333	75	ref		0	123	diff		0	103	diff		0	56	ref		1.38889	72	ref		2.98507	67	ref		18.5714	70	C/CT		12.963	108
supercont1.104:457543	CT	C	Deletion	AAEL003991	AAEL003991-RC	Other detox	alcohol dehydrogenase	5PRIME_UTR	551				na	na	na	-	na	-		11.1111	90	ref		11.2	125	C/CT		10.6796	103	C/CT		0	59	ref		0	73	ref		1.49254	67	ref		2.85714	70	diff		1.85185	108
supercont1.104:457572	C	G	Substitution	AAEL003991	AAEL003991-RC	Other detox	alcohol dehydrogenase	5PRIME_UTR	523				0.8492	0.89498	0.89712	-	-	-		0	122	ref		0	141	ref		0	114	ref		0	93	ref		5.12821	117	ref		6.38298	94	ref		33.3333	111	C/G		22.6994	163
supercont1.104:457707	T	C	Substitution	AAEL003991	AAEL003991-RC	Other detox	alcohol dehydrogenase	SPLICE_SITE					0.89122	0.88758	0.89138	StGe	-	-		73.9726	73	C/T		94.382	89	C		97.5	40	C		100	35	C		40.5797	69	C/T		19.403	67	C/T		35.7143	70	C/T		43.4343	99
supercont1.104:457715	GA	G	Deletion	AAEL003991	AAEL003991-RC	Other detox	alcohol dehydrogenase	INTRONIC					na	na	na	-	na	-		15.3846	65	ref		14.6067	89	overlap		16.6667	36	overlap		42.4242	33	ref		31.1688	77	ref		15.3846	52	G/GA		32.2581	62	G/GA		31.1828	93
supercont1.104:457715	GA	GAA	Complex	AAEL003991	AAEL003991-RC	Other detox	alcohol dehydrogenase	INTRONIC					na	na	na	-	na	-		15.3846	65	ref		14.6067	89	G/GA/GAA		16.6667	36	G/GA/GAA		42.4242	33	ref		31.1688	77	ref		15.3846	52	overlap		32.2581	62	overlap		31.1828	93
supercont1.104:457752	T	G	Substitution	AAEL003991	AAEL003991-RC	Other detox	alcohol dehydrogenase	INTRONIC					0.88707	0.86159	0.8654	-	-	-		4.54545	66	ref		14.1176	85	G/T		11.1111	36	ref		0	48	ref		0	72	ref		0	53	ref		0	73	ref		0	103
supercont1.104:457765	T	A	Substitution	AAEL003991	AAEL003991-RC	Other detox	alcohol dehydrogenase	INTRONIC					0.89639	0.9005	0.89645	-	-	-		6.77966	59	ref		28.3784	74	A/T		35.8974	39	A/T		0	45	ref		16.6667	66	ref		11.3208	53	A/T		35.3846	65	A/T		17.8218	101
supercont1.104:457774	G	A	Substitution	AAEL003991	AAEL003991-RC	Other detox	alcohol dehydrogenase	INTRONIC					0.89472	0.85335	0.89467	-	-	-		57.4074	54	A/G		77.3333	75	A/G		84.8485	33	A/G		71.4286	49	A/G		42.623	61	A/G		38.4615	52	A/G		37.6812	69	A/G		26.8041	97
supercont1.104:457811	GT	G	Deletion	AAEL003991	AAEL003991-RC	Other detox	alcohol dehydrogenase	INTRONIC					na	na	na	-	na	-		75	44	G/GT		75.4098	61	G/GT		96.6667	30	G		64.8649	37	G/GT		71.0526	38	G/GT		70	50	G/GT		79.0323	62	G/GT		73.6111	72
supercont1.104:457818	T	A	Substitution	AAEL003991	AAEL003991-RC	Other detox	alcohol dehydrogenase	INTRONIC					0.87726	0.82059	0.86124	-	-	-		4.16667	48	ref		7.14286	56	ref		0	30	ref		15.1515	33	ref		13.1579	38	ref		15.2174	46	A/T		5.45455	55	ref		11.4286	70
supercont1.104:457855	T	C	Substitution	AAEL003991	AAEL003991-RC	Other detox	alcohol dehydrogenase	5PRIME_UTR	366				0.88799	0.81145	0.89431	-	-	-		23.7288	59	ref		37.7778	45	C/T		25.7143	35	C/T		28.9474	38	ref		43.3962	53	C/T		32.4324	37	C/T		50.9434	53	C/T		41.6667	72
supercont1.104:457871	T	A	Substitution	AAEL003991	AAEL003991-RC	Other detox	alcohol dehydrogenase	5PRIME_UTR	350				0.88906	0.86424	0.87944	-	-	-		32.8125	64	A/T		18.6046	43	A/T		35.1351	37	A/T		0	44	ref		0	47	ref		0	37	ref		0	48	ref		0	78
supercont1.104:457898	C	T	Substitution	AAEL003991	AAEL003991-RC	Other detox	alcohol dehydrogenase	5PRIME_UTR	323				0.89348	0.86494	0.842	-	-	-		9.23077	65	ref		36.8421	38	C/T		28.9474	38	C/T		0	39	ref		0	55	ref		0	35	ref		0	59	ref		0	79
supercont1.104:457931	A	T	Substitution	AAEL003991	AAEL003991-RC	Other detox	alcohol dehydrogenase	5PRIME_UTR	290				0.89057	0.90097	0.8789	-	-	-		14.2857	63	ref		0	44	ref		0	43	ref		17.6471	34	ref		27.2727	55	ref		13.5135	37	A/T		3.77358	53	ref		11.2676	71
supercont1.104:457935	C	T	Substitution	AAEL003991	AAEL003991-RC	Other detox	alcohol dehydrogenase	5PRIME_UTR	286				0.86207	0.90271	0.87006	-	-	-		15	60	ref		0	45	ref		0	43	ref		17.1429	35	ref		29.0909	55	ref		13.1579	38	C/T		3.63636	55	ref		10.9589	73
supercont1.104:457939	C	G	Substitution	AAEL003991	AAEL003991-RC	Other detox	alcohol dehydrogenase	5PRIME_UTR	282				0.89222	0.90199	0.8654	-	-	-		12.5	56	ref		0	43	ref		0	39	ref		13.7931	29	lc		28.0702	57	ref		13.8889	36	C/G		3.63636	55	ref		10	70
supercont1.1047:31736	C	T	Substitution	AAEL014246	AAEL014246-RA	UGT	glycosyltransferase	5PRIME_UTR	1591				0.87936	0.88897	0.89234	-	-	-		100	31	T		100	50	T		100	51	T		72	50	C/T		82	50	T		80	30	C/T		58.3333	48	C/T		48.0769	52
supercont1.1047:31739	C	G	Substitution	AAEL014246	AAEL014246-RA	UGT	glycosyltransferase	5PRIME_UTR	1594				0.87838	0.66519	0.88056	-	-	-		0	34	ref		0	54	ref		0	56	ref		13.4615	52	ref		7.54717	53	ref		6.06061	33	ref		10.2041	49	ref		16.6667	54
supercont1.1047:31743	C	T	Substitution	AAEL014246	AAEL014246-RA	UGT	glycosyltransferase	5PRIME_UTR	1598				0.85813	0.87729	0.88733	-	-	-		2.38095	42	ref		5.17241	58	ref		5.35714	56	ref		0	49	ref		0	52	ref		0	34	ref		0	52	ref		1.66667	60
supercont1.1047:31796	A	G	Substitution	AAEL014246	AAEL014246-RA	UGT	glycosyltransferase	5PRIME_UTR	1651				0.80817	0.68202	0.88391	-	-	-		0	74	ref		0	70	ref		0	81	ref		13.0952	84	ref		6.45161	62	ref		7.14286	70	ref		11.4286	70	A/G		18.2609	115
supercont1.1047:31817	C	T	Substitution	AAEL014246	AAEL014246-RA	UGT	glycosyltransferase	5PRIME_UTR	1672				0.85953	0.89182	0.88853	-	-	-		0	85	ref		0	82	ref		0	93	ref		56.6667	90	C/T		0	72	ref		1.20482	83	ref		0	83	ref		0	130
supercont1.1047:31856	T	G	Substitution	AAEL014246	AAEL014246-RA	UGT	glycosyltransferase	SYNONYMOUS_CODING	1711	9	G>G		0.88059	0.80146	0.8917	-	-	-		0	89	ref		0	108	ref		0	120	ref		18.4874	119	ref		6.74157	89	ref		12.8713	101	G/T		13.7255	102	G/T		17.2619	168
supercont1.1047:31904	G	A	Substitution	AAEL014246	AAEL014246-RA	UGT	glycosyltransferase	SYNONYMOUS_CODING	1759	25	L>L		0.84198	0.81004	0.88999	-	-	-		0	116	ref		0	125	ref		0	132	ref		21.9178	146	ref		7.37705	122	ref		13.4921	126	A/G		14.6154	130	A/G		19.8113	212
supercont1.1047:31970	C	T	Substitution	AAEL014246	AAEL014246-RA	UGT	glycosyltransferase	SYNONYMOUS_CODING	1825	47	S>S		0.86083	0.89605	0.8934	-	-	-		0	146	ref		0	140	ref		0	169	ref		57.4194	155	C/T		0	121	ref		0	143	ref		0	145	ref		0	204
supercont1.1047:32114	C	T	Substitution	AAEL014246	AAEL014246-RA	UGT	glycosyltransferase	SYNONYMOUS_CODING	1969	95	S>S		0.88445	0.89774	0.82039	-	-	-		90.9091	55	T		86.5385	52	C/T		89.0909	55	C/T		100	73	T		69.5652	69	C/T		70.5882	51	C/T		77.9221	77	C/T		87.1795	117
supercont1.1047:32120	C	T	Substitution	AAEL014246	AAEL014246-RA	UGT	glycosyltransferase	SYNONYMOUS_CODING	1975	97	F>F		0.87419	0.89751	0.81681	-	-	-		86.9565	46	T		79.4872	39	C/T		84	50	C/T		100	63	T		65.1515	66	C/T		64.4444	45	C/T		75.3623	69	C/T		83.5052	97
supercont1.1047:32124	T	G	Substitution	AAEL014246	AAEL014246-RA	UGT	glycosyltransferase	NON_SYNONYMOUS_CODING	1979	99	L>V		0.88101	0.90132	0.030183	-	Thailand	-		4.25532	47	ref		0	39	ref		0	49	ref		0	63	ref		27.1429	70	ref		31.25	48	G/T		27.5362	69	G/T		13.4021	97
supercont1.1047:32310	T	C	Substitution	AAEL014246	AAEL014246-RA	UGT	glycosyltransferase	SYNONYMOUS_CODING	2098	138	G>G		0.86559	0.78796	0.86454	-	-	-		86.6667	45	C		75.8242	91	C/T		79.0476	105	C/T		43.6782	87	C/T		29.8246	114	C/T		47.5248	101	C/T		24.4094	127	C/T		27.4286	175
supercont1.1047:32334	C	T	Substitution	AAEL014246	AAEL014246-RA	UGT	glycosyltransferase	SYNONYMOUS_CODING	2122	146	V>V		0.88101	0.88737	0.50451	-	-	-		2.83019	106	ref		0	161	ref		0	171	ref		2.5641	117	ref		21.25	160	ref		11.8056	144	C/T		9.09091	154	C/T		4.05405	222
supercont1.1047:32349	G	A	Substitution	AAEL014246	AAEL014246-RA	UGT	glycosyltransferase	SYNONYMOUS_CODING	2137	151	L>L		0.87126	0.7554	0.85007	-	-	-		94.3548	124	A		85.6383	188	A/G		85.8586	198	A/G		54.4	125	A/G		40.2439	164	A/G		72.4359	156	A/G		38.0368	163	A/G		35.8025	243
supercont1.1047:32376	A	G	Substitution	AAEL014246	AAEL014246-RA	UGT	glycosyltransferase	SYNONYMOUS_CODING	2164	160	P>P		0.89462	0.80728	0.82842	-	-	-		37.2781	169	A/G		5.72687	227	ref		4.26357	258	ref		63.3094	139	A/G		43.787	169	A/G		65.8065	155	A/G		39.5604	182	A/G		38.8112	286
supercont1.1047:32409	T	C	Substitution	AAEL014246	AAEL014246-RA	UGT	glycosyltransferase	SYNONYMOUS_CODING	2197	171	Y>Y		0.87936	0.83111	0.81914	-	-	-		98.3957	187	C		85.8407	226	C/T		86.5169	267	C/T		60.4938	162	C/T		46.6667	195	C/T		60.7362	163	C/T		36.0656	183	C/T		38.4615	299
supercont1.1047:32453	C	G	Substitution	AAEL014246	AAEL014246-RA	UGT	glycosyltransferase	NON_SYNONYMOUS_CODING	2241	186	T>R		0.87726	0.90331	0.88698	-	-	-		0	176	ref		0	210	ref		0	215	ref		0	159	ref		19.1489	141	ref		35.7724	123	C/G		9.09091	154	ref		6.74157	267
supercont1.1047:32481	C	T	Substitution	AAEL014246	AAEL014246-RA	UGT	glycosyltransferase	SYNONYMOUS_CODING	2269	195	L>L		0.78676	0.89102	0.87079	-	-	-		0	130	ref		0	148	ref		0	140	ref		0	135	ref		7.20721	111	ref		17.0455	88	C/T		2.54237	118	ref		2.9661	236
supercont1.1047:32491	T	C	Substitution	AAEL014246	AAEL014246-RA	UGT	glycosyltransferase	SYNONYMOUS_CODING	2279	199	L>L		0.8921	0.89182	0.32564	-	-	-		3.73832	107	ref		0	119	ref		0	105	ref		3.36134	119	ref		22.9167	96	ref		24.2857	70	C/T		7.75862	116	ref		5.16432	213
supercont1.1047:32496	C	T	Substitution	AAEL014246	AAEL014246-RA	UGT	glycosyltransferase	SYNONYMOUS_CODING	2284	200	P>P		0.86333	0.90145	0.88797	-	-	-		0	93	ref		0	103	ref		0	88	ref		0	113	ref		17.5824	91	ref		18.4615	65	C/T		3.84615	104	ref		5.07614	197
supercont1.1047:32505	C	A	Substitution	AAEL014246	AAEL014246-RA	UGT	glycosyltransferase	SYNONYMOUS_CODING	2293	203	A>A		0.89317	0.88667	0.84436	-	-	-		42.6667	75	A/C		72.1519	79	A/C		60.5634	71	A/C		0	99	ref		0	93	ref		0	60	ref		0.917431	109	ref		0.531915	188
supercont1.1047:32511	T	A	Substitution	AAEL014246	AAEL014246-RA	UGT	glycosyltransferase	SYNONYMOUS_CODING	2299	205	L>L		0.88834	0.8924	0.84681	Cayn	-	-		89.0909	55	A		67.2414	58	A/T		57.8947	57	A/T		48.3516	91	A/T		5.49451	91	ref		13.7931	58	A/T		12.7273	110	A/T		12.0482	166
supercont1.1047:32520	A	G	Substitution	AAEL014246	AAEL014246-RA	UGT	glycosyltransferase	SYNONYMOUS_CODING	2308	208	Q>Q		0.88834	0.89001	0.80928	-	-	-		85.7143	35	G		55.2632	38	A/G		35.2941	34	A/G		39.7436	78	A/G		3.57143	84	ref		10.9375	64	ref		10	110	A/G		9.21053	152
supercont1.1047:32521	G	A	Substitution	AAEL014246	AAEL014246-RA	UGT	glycosyltransferase	NON_SYNONYMOUS_CODING	2309	209	V>I		0.88101	0.88968	0.21805	-	-	-		6.06061	33	ref		0	35	ref		0	33	ref		2.7027	74	ref		24.6753	77	ref		23.4375	64	A/G		7.40741	108	ref		6.16438	146
supercont1.1047:32566	C	A	Substitution	AAEL014246	AAEL014246-RA	UGT	glycosyltransferase	SYNONYMOUS_CODING	2354	224	R>R		0.88726	0.88179	0.84804	-	-	-		71.4286	35	A/C		70.2128	47	A/C		74.4186	43	A/C		26.3158	57	ref		2.17391	46	ref		6.12245	49	ref		3.48837	86	ref		5.6	125
supercont1.1047:32595	G	A	Substitution	AAEL014246	AAEL014246-RA	UGT	glycosyltransferase	SYNONYMOUS_CODING	2383	233	V>V		0.87199	0.87379	0.88825	-	-	-		0	83	ref		0	89	ref		0	65	ref		12.6761	71	ref		4	50	ref		11.7647	51	A/G		18.8235	85	A/G		15.4412	136
supercont1.1047:32616	A	G	Substitution	AAEL014246	AAEL014246-RA	UGT	glycosyltransferase	SYNONYMOUS_CODING	2404	240	E>E		0.87726	0.88841	0.8912	-	-	-		0	90	ref		0	110	ref		0	92	ref		0	89	ref		7.84314	51	ref		11.1111	54	A/G		4.25532	94	ref		3.47222	144
supercont1.1047:32631	G	A	Substitution	AAEL014246	AAEL014246-RA	UGT	glycosyltransferase	SYNONYMOUS_CODING	2419	245	P>P		0.88059	0.90109	0.89479	-	-	-		0	107	ref		0	112	ref		0	98	ref		0	111	ref		18.75	64	ref		24.1935	62	A/G		6.89655	116	ref		6.13497	163
supercont1.1047:32634	G	T	Substitution	AAEL014246	AAEL014246-RA	UGT	glycosyltransferase	NON_SYNONYMOUS_CODING	2422	246	E>D		0.89632	0.90085	0.85642	-	-	-		21.0526	114	ref		1.81818	110	ref		2	100	ref		0	113	ref		22.6667	75	ref		24.6154	65	G/T		6.83761	117	ref		7.18563	167
supercont1.1047:32667	T	C	Substitution	AAEL014246	AAEL014246-RA	UGT	glycosyltransferase	SYNONYMOUS_CODING	2455	257	H>H		0.87838	0.8955	0.86124	Cayn; StGe	-	-		93.0233	129	C		83.6066	122	C/T		90.9091	132	C/T		64.2336	137	C/T		7.93651	126	ref		16.1616	99	C/T		14.1791	134	C/T		21.1055	199
supercont1.1047:32718	A	G	Substitution	AAEL014246	AAEL014246-RA	UGT	glycosyltransferase	SYNONYMOUS_CODING	2506	274	P>P		0.85953	0.9053	0.86614	-	-	-		0	121	ref		0	137	ref		0	157	ref		1.22699	163	ref		46.0993	141	A/G		55.4745	137	A/G		18.6747	166	A/G		20.4348	230
supercont1.1047:32745	C	T	Substitution	AAEL014246	AAEL014246-RA	UGT	glycosyltransferase	SYNONYMOUS_CODING	2533	283	N>N		0.89198	0.85593	0.87276	-	-	-		58.7302	126	C/T		83.4395	157	C/T		86.3905	169	C/T		0	164	ref		0	149	ref		0	162	ref		0	180	ref		0	267
supercont1.1047:32802	G	A	Substitution	AAEL014246	AAEL014246-RA	UGT	glycosyltransferase	SYNONYMOUS_CODING	2590	302	K>K		0.89198	0.88781	0.86853	-	-	-		48.8189	127	A/G		79.8742	159	A/G		85.906	149	A/G		0	149	ref		0	202	ref		0	186	ref		0	174	ref		0	283
supercont1.1047:32803	G	A	Substitution	AAEL014246	AAEL014246-RA	UGT	glycosyltransferase	NON_SYNONYMOUS_CODING	2591	303	G>R		0.87978	0.89423	0.8942	-	-	-		0	127	ref		0	159	ref		0	151	ref		39.6104	154	A/G		0	209	ref		0.534759	187	ref		0	176	ref		0	283
supercont1.1047:32854	C	T	Substitution	AAEL014246	AAEL014246-RA	UGT	glycosyltransferase	SYNONYMOUS_CODING	2642	320	L>L		0.88878	0.88643	0.876	-	-	-		1.81818	55	ref		0	78	ref		0	84	ref		0	91	ref		7.58621	145	ref		6.99301	143	ref		6.28931	159	ref		3.43137	204
supercont1.1047:32856	A	G	Substitution	AAEL014246	AAEL014246-RA	UGT	glycosyltransferase	SYNONYMOUS_CODING	2644	320	L>L		0.89017	0.83749	0.88797	-	-	-		82.9787	47	G		63.6364	77	A/G		75.3247	77	A/G		48.1928	83	A/G		19.1781	146	ref		19.7183	142	A/G		25	156	A/G		19.7044	203
supercont1.1047:32859	G	A	Substitution	AAEL014246	AAEL014246-RA	UGT	glycosyltransferase	SYNONYMOUS_CODING	2647	321	A>A		0.89258	0.89906	0.68283	-	-	-		78.4314	51	A		60.2941	68	A/G		72.8395	81	A/G		51.2821	78	A/G		4.79452	146	ref		5.03597	139	diff		14.1892	148	A/G		8.71795	195
supercont1.1047:32859	G	T	Substitution	AAEL014246	AAEL014246-RA	UGT	glycosyltransferase	SYNONYMOUS_CODING	2647	321	A>A		0.89258	0.89906	0.68283	-	-	-		1.96078	51	diff		0	68	diff		0	81	diff		0	78	diff		13.6986	146	ref		12.2302	139	G/T		10.1351	148	diff		9.23077	195
supercont1.1047:32865	A	G	Substitution	AAEL014246	AAEL014246-RA	UGT	glycosyltransferase	SYNONYMOUS_CODING	2653	323	P>P		0.8842	0.88781	0.86454	-	-	-		79.5455	44	G		65.1515	66	A/G		71.7949	78	A/G		46.5753	73	A/G		5.97015	134	ref		5.22388	134	ref		10.4575	153	A/G		8.58586	198
supercont1.1047:32896	T	C	Substitution	AAEL014246	AAEL014246-RA	UGT	glycosyltransferase	SYNONYMOUS_CODING	2684	334	L>L		0.89462	0.8941	0.82629	StGe	-	-		90.9091	55	C		73.9726	73	C/T		71.6667	60	C/T		54.1667	72	C/T		20.5357	112	ref		21.8487	119	C/T		10.1852	108	C/T		17.4194	155
supercont1.1047:32954	A	AC	Insertion	AAEL014246	AAEL014246-RA	UGT	glycosyltransferase	FRAMESHIFT_CODING	2742				na	na	na	-	na	-		18	50	ref		14.2857	63	diff		31.8182	44	A/AC		43.3333	30	ref		36.1702	47	ref		39.2157	51	A/AC		48.8889	45	A/AC		52.1127	71
supercont1.1047:32994	T	C	Substitution	AAEL014246	AAEL014246-RA	UGT	glycosyltransferase	SYNONYMOUS_CODING	2782	366	G>G		0.88278	0.77788	0.79898	-	-	-		92.3077	65	C		66.6667	60	C/T		83.0189	53	C/T		74.2857	35	C/T		70	50	C/T		70.1754	57	C/T		67.2131	61	C/T		37.1795	78
supercont1.1047:33035	C	T	Substitution	AAEL014246	AAEL014246-RA	UGT	glycosyltransferase	NON_SYNONYMOUS_CODING	2823	380	T>I		0.8735	0.89423	0.88	-	-	-		0	83	ref		0	87	ref		0	86	ref		42.3077	52	C/T		0	71	ref		0	69	ref		0	89	ref		0	102
supercont1.1047:33052	T	C	Substitution	AAEL014246	AAEL014246-RA	UGT	glycosyltransferase	SYNONYMOUS_CODING	2840	386	L>L		0.88936	0.89196	0.89513	-	-	-		15.9091	88	ref		6.52174	92	ref		1.21951	82	ref		54.1667	48	C/T		42.8571	70	C/T		27.9412	68	C/T		21.1111	90	C/T		11.4286	105
supercont1.1047:33055	A	G	Substitution	AAEL014246	AAEL014246-RA	UGT	glycosyltransferase	NON_SYNONYMOUS_CODING	2843	387	N>D		0.86759	0.89498	0.88933	-	-	-		69.5122	82	A/G		75.5319	94	A/G		89.8734	79	A/G		50	44	A/G		80.8219	73	G		77.2727	66	A/G		56.6667	90	A/G		31.8182	110
supercont1.1047:33075	G	A	Substitution	AAEL014246	AAEL014246-RA	UGT	glycosyltransferase	SYNONYMOUS_CODING	2863	393	P>P		0.89359	0.88897	0.87079	-	-	-		54.7945	73	A/G		74.3243	74	A/G		91.0448	67	A/G		10.4167	48	ref		0	64	ref		3.50877	57	ref		9.21053	76	ref		6.60377	106
supercont1.1047:33107	G	C	Substitution	AAEL014246	AAEL014246-RA	UGT	glycosyltransferase	NON_SYNONYMOUS_CODING	2895	404	G>A		0.87041	0.89786	0.89989	-	-	-		2.5641	39	ref		0	39	ref		0	31	ref		58.1818	55	C/G		47.7273	44	C/G		27.5	40	C/G		22.6415	53	C/G		11.828	93
supercont1.1047:33180	G	C	Substitution	AAEL014246	AAEL014246-RA	UGT	glycosyltransferase	NON_SYNONYMOUS_CODING	2968	428	K>N		0.87199	0.90377	0.88391	-	-	-		0	31	ref		0	33	ref		0	37	ref		0	38	ref		31.4286	35	ref		28.2051	39	C/G		8.57143	35	ref		15	60
supercont1.1047:33188	C	A	Substitution	AAEL014246	AAEL014246-RA	UGT	glycosyltransferase	NON_SYNONYMOUS_CODING	2976	431	P>Q		0.89431	0.87613	0.88305	-	-	-		0	35	ref		18.4211	38	A/C		7.31707	41	ref		0	36	ref		0	36	ref		0	40	ref		0	37	ref		0	59
supercont1.1047:33247	G	A	Substitution	AAEL014246	AAEL014246-RA	UGT	glycosyltransferase	NON_SYNONYMOUS_CODING	3035	451	V>M		0.87838	0.87779	0.88981	-	-	-		59.4595	37	A/G		70.2703	37	A/G		78.3784	37	A/G		0	44	ref		0	37	ref		0	44	ref		0	45	ref		0	57
supercont1.1047:33250	G	A	Substitution	AAEL014246	AAEL014246-RA	UGT	glycosyltransferase	NON_SYNONYMOUS_CODING	3038	452	A>T		0.7715	0.90109	0.87209	-	-	-		0	37	ref		0	37	ref		0	32	ref		0	39	ref		41.6667	36	A/G		54.5455	44	A/G		27.907	43	A/G		35	60
supercont1.1047:48310	C	T	Substitution	AAEL014244	AAEL014244-RA	UGT	glycosyltransferase	SYNONYMOUS_CODING	252	84	Y>Y		0.85953	0.90435	0.86201	-	-	-		98.7654	81	T		100	123	T		100	108	T		52.2388	134	C/T		61	100	C/T		64.3564	101	C/T		28.4483	116	C/T		29.4479	163
supercont1.1047:48415	G	T	Substitution	AAEL014244	AAEL014244-RA	UGT	glycosyltransferase	SYNONYMOUS_CODING	357	119	T>T		0.89615	0.89786	0.88516	-	-	-		25.2747	91	ref		6.36364	110	ref		0	107	ref		0	149	ref		17	100	ref		11.3402	97	G/T		7.69231	130	ref		5.74163	209
supercont1.1047:48418	G	A	Substitution	AAEL014244	AAEL014244-RA	UGT	glycosyltransferase	SYNONYMOUS_CODING	360	120	A>A		0.84588	0.75036	0.8637	-	-	-		0	86	ref		0	105	ref		0	105	ref		10.274	146	ref		5.15464	97	ref		11.7021	94	A/G		11.3821	123	A/G		12.2549	204
supercont1.1047:48427	A	G	Substitution	AAEL014244	AAEL014244-RA	UGT	glycosyltransferase	SYNONYMOUS_CODING	369	123	G>G		0.89134	0.89674	0.81857	-	-	-		0	69	diff		0	91	diff		0	88	diff		37.4101	139	A/G		0	92	diff		0	89	diff		0	120	diff		0	193
supercont1.1047:48427	A	T	Substitution	AAEL014244	AAEL014244-RA	UGT	glycosyltransferase	SYNONYMOUS_CODING	369	123	G>G		0.89134	0.89674	0.81857	-	-	-		63.7681	69	A/T		92.3077	91	A/T		100	88	T		0	139	diff		38.0435	92	A/T		46.0674	89	A/T		16.6667	120	A/T		20.2073	193
supercont1.1047:48445	T	C	Substitution	AAEL014244	AAEL014244-RA	UGT	glycosyltransferase	SYNONYMOUS_CODING	387	129	I>I		0.88024	0.61576	0.88909	-	-	-		0	55	ref		0	66	ref		0	49	ref		11.2583	151	ref		7.24638	69	ref		13.0435	69	C/T		11.8182	110	C/T		15.6069	173
supercont1.1047:48449	G	C	Substitution	AAEL014244	AAEL014244-RA	UGT	glycosyltransferase	NON_SYNONYMOUS_CODING	391	131	E>Q		0.8869	0.90369	0.89042	-	-	-		2.08333	48	ref		0	60	ref		0	43	ref		0	165	ref		18.3099	71	ref		32.7869	61	C/G		7.33945	109	ref		8.57143	175
supercont1.1047:48454	T	C	Substitution	AAEL014244	AAEL014244-RA	UGT	glycosyltransferase	SYNONYMOUS_CODING	396	132	F>F		0.86858	0.89725	0.89042	-	-	-		38.6364	44	C/T		37.5	48	C/T		53.3333	30	C/T		0	149	ref		9.23077	65	ref		21.5686	51	C/T		5.60748	107	ref		6.06061	165
supercont1.1047:48471	G	A	Substitution	AAEL014244	AAEL014244-RA	UGT	glycosyltransferase	NON_SYNONYMOUS_CODING	413	138	S>N		0.12103	0.85048	0.6339	Lab	-	-		0	40	ref		52.5	40	A/G		40	35	A/G		0	135	ref		8.57143	70	ref		0	50	ref		0	90	ref		4.08163	147
supercont1.1047:48496	A	G	Substitution	AAEL014244	AAEL014244-RA	UGT	glycosyltransferase	SYNONYMOUS_CODING	438	146	E>E		0.8735	0.89577	0.89567	-	-	-		0	69	ref		0	77	ref		0	61	ref		35.7143	112	A/G		0	82	ref		0	71	ref		0	96	ref		0	171
supercont1.1047:48517	C	T	Substitution	AAEL014244	AAEL014244-RA	UGT	glycosyltransferase	SYNONYMOUS_CODING	459	153	Y>Y		0.86207	0.89226	0.88909	-	-	-		100	82	T		100	101	T		100	100	T		46.8354	79	C/T		62.8866	97	C/T		72.1519	79	C/T		39.1753	97	C/T		44.9704	169
supercont1.1047:48526	A	C	Substitution	AAEL014244	AAEL014244-RA	UGT	glycosyltransferase	NON_SYNONYMOUS_CODING	468	156	L>F		0.88248	0.90481	0.73518	-	-	-		84.0909	88	C		81.25	112	C/T		91.8919	111	C/T		33.8235	68	C/T		1.03093	97	diff		20.9302	86	diff		12	100	diff		16.7665	167
supercont1.1047:48526	A	T	Substitution	AAEL014244	AAEL014244-RA	UGT	glycosyltransferase	NON_SYNONYMOUS_CODING	468	156	L>F		0.88248	0.90481	0.73518	-	-	-		15.9091	88	diff		18.75	112	C/T		8.10811	111	C/T		66.1765	68	C/T		63.9175	97	A/T		56.9767	86	A/T		33	100	A/T		30.5389	167
supercont1.1047:48553	G	C	Substitution	AAEL014244	AAEL014244-RA	UGT	glycosyltransferase	SYNONYMOUS_CODING	495	165	V>V		0.86083	0.88861	0.88628	-	-	-		0	98	ref		0	125	ref		0	119	ref		39.4737	76	C/G		5.88235	102	ref		15.5556	90	C/G		17.5926	108	C/G		17.284	162
supercont1.1047:48621	A	T	Substitution	AAEL014244	AAEL014244-RA	UGT	glycosyltransferase	SYNONYMOUS_CODING	507	169	T>T		0.89494	0.86087	0.88958	-	-	-		53.4247	146	A/T		82.3899	159	A/T		84.7458	118	A/T		0	59	ref		0	128	ref		0	113	ref		0	136	ref		1.05263	190
supercont1.1047:48630	C	T	Substitution	AAEL014244	AAEL014244-RA	UGT	glycosyltransferase	SYNONYMOUS_CODING	516	172	F>F		0.88024	0.88841	0.89387	-	-	-		0	141	ref		0	168	ref		0	122	ref		51.5625	64	C/T		0	125	ref		0	119	ref		0	136	ref		0	196
supercont1.1047:48720	C	T	Substitution	AAEL014244	AAEL014244-RA	UGT	glycosyltransferase	SYNONYMOUS_CODING	606	202	F>F		0.86959	0.88667	0.89022	-	-	-		0	127	ref		0	163	ref		0	139	ref		31.5068	73	C/T		6.20155	129	ref		12.8205	117	C/T		19.3103	145	C/T		14.9254	201
supercont1.1047:48789	C	T	Substitution	AAEL014244	AAEL014244-RA	UGT	glycosyltransferase	SYNONYMOUS_CODING	675	225	P>P		0.8869	0.88299	0.88766	-	-	-		74.5455	110	C/T		86.9565	138	C/T		86.8852	122	C/T		0	72	ref		0	110	ref		0	131	ref		0	132	ref		0	198
supercont1.1047:48834	T	C	Substitution	AAEL014244	AAEL014244-RA	UGT	glycosyltransferase	SYNONYMOUS_CODING	720	240	G>G		0.88978	0.83145	0.88257	-	-	-		6.45161	62	ref		0	95	ref		0	97	ref		1.05263	95	ref		11.5385	104	ref		14.6341	123	C/T		5.21739	115	ref		5.47264	201
supercont1.1047:48840	G	A	Substitution	AAEL014244	AAEL014244-RA	UGT	glycosyltransferase	SYNONYMOUS_CODING	726	242	L>L		0.88815	0.87492	0.89288	-	-	-		68.254	63	A/G		82.7586	87	A/G		79.3103	87	A/G		0	104	ref		0	115	ref		0	114	ref		0	106	ref		0	192
supercont1.1047:48960	A	G	Substitution	AAEL014244	AAEL014244-RA	UGT	glycosyltransferase	SYNONYMOUS_CODING	846	282	K>K		0.89097	0.88802	0.8557	-	-	-		18.9189	37	ref		37.1429	35	A/G		52.7778	36	A/G		23.2877	73	ref		0.806452	124	ref		5.45455	110	ref		3.33333	120	ref		4.44444	180
supercont1.1047:48981	G	A	Substitution	AAEL014244	AAEL014244-RA	UGT	glycosyltransferase	SYNONYMOUS_CODING	867	289	E>E		0.74245	0.87555	0.88439	-	-	-		65.7143	35	A/G		13.5135	37	A/G		13.1579	38	A/G		0	77	ref		0	122	ref		0	109	ref		0	135	ref		0	183
supercont1.1047:48984	C	T	Substitution	AAEL014244	AAEL014244-RA	UGT	glycosyltransferase	SYNONYMOUS_CODING	870	290	D>D		0.84588	0.8862	0.8816	-	-	-		0	35	ref		0	38	ref		0	39	ref		0	81	ref		7.25806	124	ref		11.4286	105	C/T		3.5461	141	ref		3.88889	180
supercont1.1047:49041	A	G	Substitution	AAEL014244	AAEL014244-RA	UGT	glycosyltransferase	SYNONYMOUS_CODING	927	309	T>T		0.88545	0.86352	0.89364	-	-	-		36.5854	41	ref		45	60	A/G		57.5758	33	A/G		27.1605	81	ref		0	158	ref		1.25786	159	ref		0	155	ref		0.97561	205
supercont1.1047:49075	T	C	Substitution	AAEL014244	AAEL014244-RA	UGT	glycosyltransferase	SYNONYMOUS_CODING	961	321	L>L		0.86759	0.85957	0.89851	-	-	-		65.7534	73	C/T		67.3267	101	C/T		71.6216	74	C/T		48.3871	93	C/T		0	154	ref		1.33333	150	ref		0	150	ref		0.995025	201
supercont1.1047:49083	C	T	Substitution	AAEL014244	AAEL014244-RA	UGT	glycosyltransferase	SYNONYMOUS_CODING	969	323	A>A		0.87274	0.87923	0.88797	-	-	-		65.8824	85	C/T		68.3333	120	C/T		76.4045	89	C/T		40.9524	105	C/T		0	164	ref		1.23457	162	ref		0	147	ref		0.985222	203
supercont1.1047:49113	A	G	Substitution	AAEL014244	AAEL014244-RA	UGT	glycosyltransferase	SYNONYMOUS_CODING	999	333	Q>Q		0.81146	0.87186	0.74184	Phet	-	-		100	88	G		80.597	134	A/G		88.0342	117	A/G		100	94	G		95.1049	143	G		100	150	G		100	160	G		95.4545	198
supercont1.1047:49146	A	G	Substitution	AAEL014244	AAEL014244-RA	UGT	glycosyltransferase	NON_SYNONYMOUS_CODING	1032	344	I>M		0.86455	0.82124	0.85419	-	-	-		57.1429	63	A/G		64.6465	99	A/G		78.3505	97	A/G		11.9403	67	ref		1.3986	143	ref		4.375	160	ref		5.76923	156	ref		6.39269	219
supercont1.1047:49175	A	T	Substitution	AAEL014244	AAEL014244-RA	UGT	glycosyltransferase	NON_SYNONYMOUS_CODING	1061	354	K>M		0.86559	0.89118	0.88349	-	-	-		0	42	ref		0	59	ref		0	56	ref		0	53	ref		7.85714	140	ref		17.3077	156	A/T		8.27586	145	A/T		1.87793	213
supercont1.1047:49179	G	T	Substitution	AAEL014244	AAEL014244-RA	UGT	glycosyltransferase	SYNONYMOUS_CODING	1065	355	S>S		0.89222	0.70387	0.87341	-	-	-		27.027	37	ref		43.1373	51	G/T		52	50	G/T		4.08163	49	ref		1.45985	137	ref		1.25	160	ref		2.12766	141	ref		2.83019	212
supercont1.1047:49188	A	G	Substitution	AAEL014244	AAEL014244-RA	UGT	glycosyltransferase	SYNONYMOUS_CODING	1074	358	P>P		0.7529	0.44499	0.89288	Lab	-	-		81.25	32	G		29.4118	34	A/G		57.8947	38	A/G		100	42	G		6.20155	129	ref		9.69697	165	A/G		4.86111	144	ref		8.6758	219
supercont1.1047:49281	C	T	Substitution	AAEL014244	AAEL014244-RA	UGT	glycosyltransferase	SYNONYMOUS_CODING	1167	389	P>P		0.88654	0.88226	0.88933	-	-	-		33.3333	57	ref		39.2157	51	C/T		73.1707	41	C/T		0	83	ref		0	154	ref		0	167	ref		0	149	ref		0	222
supercont1.1047:49290	C	A	Substitution	AAEL014244	AAEL014244-RA	UGT	glycosyltransferase	SYNONYMOUS_CODING	1176	392	G>G		0.87488	0.87826	0.87341	-	-	-		60.6061	66	A/C		50.8772	57	A/C		77.2727	44	A/C		15.6627	83	ref		0	144	ref		0	158	ref		0	137	ref		0	207
supercont1.1047:49353	C	G	Substitution	AAEL014244	AAEL014244-RA	UGT	glycosyltransferase	SYNONYMOUS_CODING	1239	413	V>V		0.67835	0.86029	0.89735	Nakh	-	-		0	86	ref		22.7273	88	C/G		13.5802	81	C/G		0	80	ref		4.71698	106	ref		0.813008	123	ref		0	126	ref		4.62428	173
supercont1.1047:49356	G	A	Substitution	AAEL014244	AAEL014244-RA	UGT	glycosyltransferase	SYNONYMOUS_CODING	1242	414	R>R		0.88278	0.87379	0.89431	-	-	-		73.75	80	A/G		75	84	A/G		77.6316	76	A/G		20.9877	81	ref		0	108	ref		0	119	ref		0	120	ref		0	172
supercont1.1047:49368	A	G	Substitution	AAEL014244	AAEL014244-RA	UGT	glycosyltransferase	SYNONYMOUS_CODING	1254	418	P>P		0.88726	0.79159	0.88733	-	-	-		71.0145	69	A/G		76.3158	76	A/G		76.3158	76	A/G		12.3457	81	ref		10.6195	113	ref		4.38596	114	ref		4.7619	126	ref		7.55814	172
supercont1.1047:49392	G	A	Substitution	AAEL014244	AAEL014244-RA	UGT	glycosyltransferase	SYNONYMOUS_CODING	1278	426	R>R		0.88394	0.83957	0.88113	-	-	-		70	70	A/G		77.5	80	A/G		76	75	A/G		5.26316	76	ref		0	126	ref		0	126	ref		0	124	ref		0	160
supercont1.1047:49416	T	C	Substitution	AAEL014244	AAEL014244-RA	UGT	glycosyltransferase	SYNONYMOUS_CODING	1302	434	Y>Y		0.86207	0.87729	0.80675	-	-	-		97.6744	86	C		80.2817	71	C/T		84.7222	72	C/T		27.7778	90	ref		0	131	ref		0	112	ref		0	110	ref		0	164
supercont1.1047:49452	T	C	Substitution	AAEL014244	AAEL014244-RA	UGT	glycosyltransferase	SYNONYMOUS_CODING	1338	446	S>S		0.87936	0.89605	0.80188	-	-	-		73.2673	101	C/T		79.1209	91	C/T		83.5294	85	C/T		46.3158	95	C/T		0.970874	103	ref		0	85	ref		0.943396	106	ref		0	164
supercont1.1047:49540	C	T	Substitution	AAEL014244	AAEL014244-RA	UGT	glycosyltransferase	SYNONYMOUS_CODING	1426	476	L>L		0.89163	0.86985	0.87542	-	-	-		43.6364	55	C/T		67.3913	46	C/T		82.2581	62	C/T		0	81	ref		0	83	ref		0	86	ref		0	115	ref		0	135
supercont1.1047:49545	G	T	Substitution	AAEL014244	AAEL014244-RA	UGT	glycosyltransferase	SYNONYMOUS_CODING	1431	477	R>R		0.87978	0.87186	0.89263	-	-	-		56.25	48	G/T		65.9574	47	G/T		81.6667	60	G/T		32.4324	74	G/T		0	80	ref		0	86	ref		0	112	ref		0	137
supercont1.1047:49551	T	A	Substitution	AAEL014244	AAEL014244-RA	UGT	glycosyltransferase	SYNONYMOUS_CODING	1437	479	A>A		0.87041	0.89307	0.89398	-	-	-		0	44	ref		0	44	ref		0	57	ref		28.9855	69	ref		0	80	ref		0	89	ref		0	113	ref		0	127
supercont1.1047:49554	C	T	Substitution	AAEL014244	AAEL014244-RA	UGT	glycosyltransferase	SYNONYMOUS_CODING	1440	480	G>G		0.88473	0.89118	0.89061	-	-	-		50	38	C/T		64.1026	39	C/T		81.1321	53	C/T		27.5862	58	ref		0	74	ref		0	89	ref		0	112	ref		0	131
supercont1.1047:49560	C	T	Substitution	AAEL014244	AAEL014244-RA	UGT	glycosyltransferase	SYNONYMOUS_CODING	1446	482	D>D		0.67835	0.83071	0.89467	Nakh	-	-		0	34	ref		35.8974	39	C/T		14.8936	47	C/T		0	57	ref		0	82	ref		2.24719	89	ref		0	111	ref		1.5873	126
supercont1.105:1076772	C	A	Substitution	AAEL004032	AAEL004032-RA	Synaptic receptor	acetylcholine receptor protein alpha	STOP_GAINED	12	4	Y>Stop		0.82275	0.85593	0.88933	-	-	-		0	140	ref		0	159	ref		0	114	ref		0	151	ref		0	155	ref		0	137	ref		0	148	ref		0	213
supercont1.105:1076778	A	T	Substitution	AAEL004032	AAEL004032-RA	Synaptic receptor	acetylcholine receptor protein alpha	NON_SYNONYMOUS_CODING	18	6	L>F		0.87126	0.78322	0.90199	-	-	-		34.0426	141	A/T		29.8781	164	A/T		26.7241	116	A/T		21.0526	152	ref		32.9114	158	A/T		38.8489	139	A/T		25.8741	143	A/T		35.1351	222
supercont1.105:1076823	C	T	Substitution	AAEL004032	AAEL004032-RA	Synaptic receptor	acetylcholine receptor protein alpha	SYNONYMOUS_CODING	63	21	F>F		0.86959	0.8854	0.87079	-	-	-		35.2941	153	C/T		25.4237	177	C/T		25.1799	139	C/T		0	161	ref		0	155	ref		0	151	ref		0	147	ref		0	234
supercont1.105:1076856	T	A	Substitution	AAEL004032	AAEL004032-RA	Synaptic receptor	acetylcholine receptor protein alpha	SYNONYMOUS_CODING	96	32	L>L		0.87041	0.89751	0.8772	-	-	-		0	136	ref		0	168	ref		0	145	ref		34.6405	153	A/T		0.649351	154	ref		0.746269	134	ref		0	140	ref		0	226
supercont1.105:1076889	C	T	Substitution	AAEL004032	AAEL004032-RA	Synaptic receptor	acetylcholine receptor protein alpha	SYNONYMOUS_CODING	129	43	P>P		0.86455	0.83824	0.89905	-	-	-		0	118	ref		0	163	ref		0	144	ref		0	146	ref		0	141	ref		0	142	ref		24.1935	124	C/T		24.0741	216
supercont1.105:1076913	T	C	Substitution	AAEL004032	AAEL004032-RA	Synaptic receptor	acetylcholine receptor protein alpha	SYNONYMOUS_CODING	153	51	D>D		0.85238	0.90222	0.8772	-	-	-		0	107	ref		0	160	ref		0	142	ref		51.9084	131	C/T		13.0769	130	ref		14.8936	141	C/T		41.8182	110	C/T		28.5714	196
supercont1.105:1077023	A	G	Substitution	AAEL004032	AAEL004032-RA	Synaptic receptor	acetylcholine receptor protein alpha	INTRONIC					0.89222	0.86424	0.87079	-	-	-		45	60	A/G		20.2703	74	A/G		21.5686	51	A/G		1.88679	53	ref		0	65	ref		0	67	ref		0	59	ref		0	83
supercont1.105:1121548	C	T	Substitution	AAEL004032	AAEL004032-RA	Synaptic receptor	acetylcholine receptor protein alpha	INTRONIC					0.88815	0.69175	0.89154	-	-	-		52.7027	74	C/T		37.8378	74	C/T		39.3443	61	C/T		44.6154	65	C/T		44.5783	83	C/T		42.1875	64	C/T		45.8333	72	C/T		25.3165	79
supercont1.105:1143002	CT	C	Deletion	AAEL004032	AAEL004032-RA	Synaptic receptor	acetylcholine receptor protein alpha	INTRONIC					na	na	na	-	na	-		0	49	ref		0	54	ref		0	53	ref		0	54	ref		0	64	ref		0	41	ref		0	51	ref		0	97
supercont1.105:1145246	T	C	Substitution	AAEL004032	AAEL004032-RA	Synaptic receptor	acetylcholine receptor protein alpha	SYNONYMOUS_CODING	784	262	L>L		0.88978	0.80785	0.89081	-	-	-		62.5	112	C/T		48.5075	134	C/T		46.2963	108	C/T		54.6392	97	C/T		47.8873	142	C/T		46.7742	124	C/T		59.4828	116	C/T		42.8571	154
supercont1.105:1145560	T	C	Substitution	AAEL004032	AAEL004032-RA	Synaptic receptor	acetylcholine receptor protein alpha	SYNONYMOUS_CODING	1098	366	F>F		0.89085	0.88509	0.88733	-	-	-		17.0213	94	ref		0	110	ref		0	114	ref		0	104	ref		0	85	ref		0	91	ref		0	108	ref		0	181
supercont1.105:1153122	G	A	Substitution	AAEL004032	AAEL004032-RA	Synaptic receptor	acetylcholine receptor protein alpha	SYNONYMOUS_CODING	1215	405	A>A		0.85953	0.88375	0.87276	-	-	-		27.6596	47	ref		30.9091	55	A/G		30.9091	55	A/G		0	62	ref		0	57	ref		0	48	ref		0	63	ref		1.07527	93
supercont1.105:1153158	T	C	Substitution	AAEL004032	AAEL004032-RA	Synaptic receptor	acetylcholine receptor protein alpha	SYNONYMOUS_CODING	1251	417	G>G		0.88589	0.78674	0.89905	-	-	-		51.1628	43	C/T		53.5714	56	C/T		47.6923	65	C/T		48.3333	60	C/T		40.4255	47	C/T		25	48	C/T		35.2941	68	C/T		25	100
supercont1.105:1153760	T	C	Substitution	AAEL004032	AAEL004032-RA	Synaptic receptor	acetylcholine receptor protein alpha	SYNONYMOUS_CODING	1417	473	L>L		0.89327	0.88338	0.88391	-	-	-		20	75	ref		37.2549	102	C/T		47.2727	110	C/T		0	96	ref		0	79	ref		0	120	ref		0	93	ref		0	169
supercont1.105:1153913	A	G	Substitution	AAEL004032	AAEL004032-RA	Synaptic receptor	acetylcholine receptor protein alpha	INTRONIC					0.88567	0.87434	0.86928	-	-	-		64.8649	37	A/G		50	40	A/G		54.2857	35	A/G		0	46	ref		0	32	ref		0	50	ref		0	48	ref		0	60
supercont1.105:131574	G	A	Substitution	AAEL004012	AAEL004012-RA	P450	cytochrome P450 CYP325AA1	SYNONYMOUS_CODING	1488	496	C>C		0.88142	0.88841	0.87944	-	-	-		7.40741	108	ref		16.129	124	A/G		16.129	93	A/G		0	104	ref		0	94	ref		0	94	ref		0	105	ref		0	150
supercont1.105:131581	A	C	Substitution	AAEL004012	AAEL004012-RA	P450	cytochrome P450 CYP325AA1	NON_SYNONYMOUS_CODING	1481	494	V>G		0.86858	0.88758	0.88056	-	-	-		15.6863	102	ref		9.83606	122	A/C		11.7021	94	A/C		0	104	ref		0	90	ref		0	100	ref		0	108	ref		0	149
supercont1.105:131595	C	G	Substitution	AAEL004012	AAEL004012-RA	P450	cytochrome P450 CYP325AA1	SYNONYMOUS_CODING	1467	489	G>G		0.87726	0.88935	0.90009	-	-	-		0	112	ref		0	134	ref		0	95	ref		0	125	ref		0	97	ref		0	103	ref		0	112	ref		0	157
supercont1.105:131601	G	T	Substitution	AAEL004012	AAEL004012-RA	P450	cytochrome P450 CYP325AA1	SYNONYMOUS_CODING	1461	487	L>L		0.87549	0.90353	0.88477	-	-	-		0	107	ref		0	135	ref		0	99	ref		0	117	ref		30	90	G/T		18.0952	105	G/T		5.12821	117	ref		8.58896	163
supercont1.105:131667	CT	C	Deletion	AAEL004012	AAEL004012-RA	P450	cytochrome P450 CYP325AA1	FRAMESHIFT_CODING	1394				na	na	na	-	na	-		10.6796	103	ref		0	134	ref		0	109	ref		0	119	ref		0	107	ref		0	106	ref		0	121	ref		0	171
supercont1.105:131774	G	T	Substitution	AAEL004012	AAEL004012-RA	P450	cytochrome P450 CYP325AA1	SYNONYMOUS_CODING	1288	430	R>R		0.87936	0.78477	0.87779	-	-	-		0	90	ref		0	95	ref		0	89	ref		19.5122	82	ref		4.87805	82	ref		12.7907	86	G/T		10.2041	98	G/T		5.14706	136
supercont1.105:131778	T	A	Substitution	AAEL004012	AAEL004012-RA	P450	cytochrome P450 CYP325AA1	SYNONYMOUS_CODING	1284	428	G>G		0.87783	0.72322	0.85007	-	-	-		0	78	ref		0	102	ref		0	87	ref		19.1781	73	ref		6.75676	74	ref		12.5	88	A/T		10.8911	101	A/T		5.10949	137
supercont1.105:131814	G	T	Substitution	AAEL004012	AAEL004012-RA	P450	cytochrome P450 CYP325AA1	SYNONYMOUS_CODING	1248	416	R>R		0.8667	0.85102	0.89453	-	-	-		0	73	ref		0	104	ref		0	72	ref		0	82	ref		0	77	ref		0	88	ref		0	93	ref		0	142
supercont1.105:131829	A	G	Substitution	AAEL004012	AAEL004012-RA	P450	cytochrome P450 CYP325AA1	SYNONYMOUS_CODING	1233	411	P>P		0.85813	0.90189	0.88477	-	-	-		0	71	ref		0	92	ref		0	64	ref		0	77	ref		9.45946	74	ref		13.1579	76	A/G		17.5258	97	A/G		21.7054	129
supercont1.105:131843	C	T	Substitution	AAEL004012	AAEL004012-RA	P450	cytochrome P450 CYP325AA1	NON_SYNONYMOUS_CODING	1219	407	D>N		0.87199	0.89774	0.8772	-	-	-		0	69	ref		0	92	ref		0	63	ref		0	79	ref		13.1579	76	ref		13.75	80	C/T		17.4419	86	C/T		23.741	139
supercont1.105:131856	A	G	Substitution	AAEL004012	AAEL004012-RA	P450	cytochrome P450 CYP325AA1	SYNONYMOUS_CODING	1206	402	L>L		0.88992	0.89118	0.86853	-	-	-		27.5862	58	ref		21.7949	78	A/G		23.1884	69	A/G		0	83	ref		2.89855	69	ref		2.43902	82	ref		1.26582	79	ref		3.64963	137
supercont1.105:131860	A	G	Substitution	AAEL004012	AAEL004012-RA	P450	cytochrome P450 CYP325AA1	NON_SYNONYMOUS_CODING	1202	401	V>A		0.89057	0.88667	0.88	-	-	-		38.7755	49	A/G		22.6667	75	A/G		22.8571	70	A/G		0	62	ref		0	58	ref		2.53165	79	ref		1.36986	73	ref		4.31655	139
supercont1.105:131901	G	A	Substitution	AAEL004012	AAEL004012-RA	P450	cytochrome P450 CYP325AA1	SYNONYMOUS_CODING	1161	387	I>I		0.8492	0.80029	0.89513	-	-	-		7.84314	51	ref		12.2807	57	A/G		15	60	A/G		12.6582	79	ref		16.3636	55	ref		28.8462	52	A/G		24.6154	65	A/G		40	85
supercont1.105:131916	A	G	Substitution	AAEL004012	AAEL004012-RA	P450	cytochrome P450 CYP325AA1	SYNONYMOUS_CODING	1146	382	N>N		0.88059	0.79402	0.8772	-	-	-		16.6667	48	ref		17.2414	58	A/G		18.6441	59	A/G		10.9375	64	ref		23.0769	52	ref		46.5116	43	A/G		22.807	57	A/G		31.8841	69
supercont1.105:131955	C	A	Substitution	AAEL004012	AAEL004012-RA	P450	cytochrome P450 CYP325AA1	SYNONYMOUS_CODING	1107	369	S>S		0.88473	0.83306	0.89248	-	-	-		1.5625	64	ref		5.55556	54	ref		7.14286	56	ref		7.69231	65	ref		5.76923	52	ref		17.9487	39	A/C		16.129	62	A/C		20.8333	72
supercont1.105:131982	G	C	Substitution	AAEL004012	AAEL004012-RA	P450	cytochrome P450 CYP325AA1	SYNONYMOUS_CODING	1080	360	P>P		0.88278	0.89944	0.88516	-	-	-		29.6296	81	ref		21.4286	70	C/G		36.9863	73	C/G		0	65	ref		32.3944	71	C/G		24.6154	65	C/G		20.9877	81	C/G		37.3832	107
supercont1.105:131985	C	T	Substitution	AAEL004012	AAEL004012-RA	P450	cytochrome P450 CYP325AA1	SYNONYMOUS_CODING	1077	359	V>V		0.88473	0.89685	0.89234	-	-	-		0	87	ref		0	71	ref		0	71	ref		0	60	ref		2.5	80	ref		5.71429	70	ref		14.8148	81	C/T		25.7143	105
supercont1.105:132000	C	T	Substitution	AAEL004012	AAEL004012-RA	P450	cytochrome P450 CYP325AA1	SYNONYMOUS_CODING	1062	354	R>R		0.82275	0.87492	0.90336	-	-	-		0	88	ref		0	68	ref		0	84	ref		0	71	ref		0	80	ref		0	91	ref		0	92	ref		0	129
supercont1.105:132041	C	T	Substitution	AAEL004012	AAEL004012-RA	P450	cytochrome P450 CYP325AA1	NON_SYNONYMOUS_CODING	1021	341	D>N		0.86858	0.88823	0.89775	-	-	-		0	106	ref		0	97	ref		0	117	ref		0	93	ref		0	112	ref		0	125	ref		2.04082	98	ref		12.1019	157
supercont1.105:132042	C	T	Substitution	AAEL004012	AAEL004012-RA	P450	cytochrome P450 CYP325AA1	SYNONYMOUS_CODING	1020	340	K>K		0.87838	0.87613	0.86454	-	-	-		11.0092	109	ref		15	100	C/T		22.6891	119	C/T		0	96	ref		0	112	ref		0	126	ref		0	95	ref		0	160
supercont1.105:132089	T	A	Substitution	AAEL004012	AAEL004012-RA	P450	cytochrome P450 CYP325AA1	NON_SYNONYMOUS_CODING	973	325	T>S		0.87783	0.90008	0.85781	-	-	-		0	104	ref		0	110	ref		0	135	ref		0	108	ref		24.4898	98	ref		23.3577	137	A/T		2.80374	107	ref		9.14634	164
supercont1.105:132102	A	T	Substitution	AAEL004012	AAEL004012-RA	P450	cytochrome P450 CYP325AA1	SYNONYMOUS_CODING	960	320	A>A		0.85521	0.87379	0.90105	-	-	-		0	113	ref		0	115	ref		0	139	ref		0	119	ref		0	102	ref		0	149	ref		0	100	ref		0	166
supercont1.105:132110	T	C	Substitution	AAEL004012	AAEL004012-RA	P450	cytochrome P450 CYP325AA1	NON_SYNONYMOUS_CODING	952	318	R>G		0.86207	0.89591	0.90517	-	-	-		0	104	ref		0	115	ref		0	126	ref		27.2727	121	ref		0	101	ref		0	140	ref		0	94	ref		0	162
supercont1.105:132119	T	C	Substitution	AAEL004012	AAEL004012-RA	P450	cytochrome P450 CYP325AA1	NON_SYNONYMOUS_CODING	943	315	I>V		0.87726	0.84353	0.89042	-	-	-		34.4828	116	C/T		38.0531	113	C/T		52.5424	118	C/T		17.2131	122	ref		47.3118	93	C/T		48.1203	133	C/T		39.3258	89	C/T		57.6687	163
supercont1.105:132125	G	A	Substitution	AAEL004012	AAEL004012-RA	P450	cytochrome P450 CYP325AA1	NON_SYNONYMOUS_CODING	937	313	P>S		0.74245	0.83606	0.89453	-	-	-		10.6195	113	ref		10.0917	109	A/G		23.7288	118	A/G		14.2857	126	ref		43.617	94	A/G		47.7273	132	A/G		34.375	96	A/G		50.2924	171
supercont1.105:132212	G	A	Substitution	AAEL004012	AAEL004012-RA	P450	cytochrome P450 CYP325AA1	INTRONIC					0.88521	0.8279	0.89735	-	-	-		0	115	ref		0	113	ref		0	133	ref		13.2231	121	ref		6.09756	82	ref		23.1707	82	A/G		14.6067	89	A/G		7.35294	136
supercont1.105:132212	G	C	Substitution	AAEL004012	AAEL004012-RA	P450	cytochrome P450 CYP325AA1	INTRONIC					0.88521	0.8279	0.89735	-	-	-		0	115	ref		0	113	ref		0	133	ref		0	121	ref		0	82	ref		0	82	diff		0	89	diff		0	136
supercont1.105:132234	G	A	Substitution	AAEL004012	AAEL004012-RA	P450	cytochrome P450 CYP325AA1	INTRONIC					0.82275	0.87826	0.86454	-	-	-		24.2991	107	ref		20.4545	132	A/G		27.4074	135	A/G		0	137	ref		0	104	ref		0	100	ref		0	102	ref		0	162
supercont1.105:132264	G	A	Substitution	AAEL004012	AAEL004012-RA	P450	cytochrome P450 CYP325AA1	SYNONYMOUS_CODING	867	289	T>T		0.8256	0.88781	0.83362	-	-	-		50	102	A/G		47.9167	144	A/G		52.5926	135	A/G		16.9231	130	ref		46.4567	127	A/G		53.9823	113	A/G		29.2683	123	A/G		48.8889	180
supercont1.105:132289	T	A	Substitution	AAEL004012	AAEL004012-RA	P450	cytochrome P450 CYP325AA1	NON_SYNONYMOUS_CODING	842	281	D>V		0.88214	0.88179	0.86614	-	-	-		0	117	ref		0	146	ref		0	141	ref		0	141	ref		0	131	ref		0	134	ref		0	134	ref		0	185
supercont1.105:132297	G	A	Substitution	AAEL004012	AAEL004012-RA	P450	cytochrome P450 CYP325AA1	SYNONYMOUS_CODING	834	278	F>F		0.87978	0.87492	0.88698	-	-	-		0	118	ref		0	151	ref		0	145	ref		0	138	ref		0	125	ref		0	139	ref		0	138	ref		0	187
supercont1.105:132392	T	C	Substitution	AAEL004012	AAEL004012-RA	P450	cytochrome P450 CYP325AA1	INTRONIC					0.87783	0.89087	0.89467	-	-	-		0	98	ref		0	133	ref		0	132	ref		0	107	ref		0	107	ref		0.793651	126	ref		4.20168	119	ref		11.7021	188
supercont1.105:132493	G	A	Substitution	AAEL004012	AAEL004012-RA	P450	cytochrome P450 CYP325AA1	SYNONYMOUS_CODING	732	244	R>R		0.79385	0.90085	0.89431	-	-	-		21.9298	114	ref		15.8333	120	A/G		8.84956	113	A/G		0	88	ref		33.3333	129	A/G		30.3279	122	A/G		11.2903	124	A/G		15.1351	185
supercont1.105:132511	A	G	Substitution	AAEL004012	AAEL004012-RA	P450	cytochrome P450 CYP325AA1	SYNONYMOUS_CODING	714	238	N>N		0.79974	0.89498	0.89479	-	-	-		0	122	ref		0	123	ref		0	125	ref		0	90	ref		0	127	ref		0	128	ref		7.31707	123	ref		12.5	184
supercont1.105:132553	T	C	Substitution	AAEL004012	AAEL004012-RA	P450	cytochrome P450 CYP325AA1	SYNONYMOUS_CODING	672	224	R>R		0.88473	0.74265	0.83698	-	-	-		29.3478	92	C/T		20.9091	110	C/T		43.5897	117	C/T		23.4568	81	ref		32.9787	94	C/T		37.5	128	C/T		35	100	C/T		45.679	162
supercont1.105:132605	A	T	Substitution	AAEL004012	AAEL004012-RA	P450	cytochrome P450 CYP325AA1	NON_SYNONYMOUS_CODING	620	207	L>Q		0.88545	0.79808	0.87478	-	-	-		0	85	ref		0	90	ref		0	69	ref		23.5294	68	ref		5.1948	77	ref		18.5185	81	A/T		8.23529	85	ref		3.66972	109
supercont1.105:132641	G	A	Substitution	AAEL004012	AAEL004012-RA	P450	cytochrome P450 CYP325AA1	SPLICE_SITE					0.85813	0.81963	0.86614	-	-	-		0	58	ref		0	66	ref		0	42	ref		15	40	ref		3.77358	53	ref		16.0714	56	A/G		12.6984	63	A/G		2.40964	83
supercont1.105:139561	A	G	Substitution	AAEL004012	AAEL004012-RA	P450	cytochrome P450 CYP325AA1	SYNONYMOUS_CODING	481	161	L>L		0.8767	0.88226	0.89022	-	-	-		0	126	ref		0	111	ref		0	136	ref		0	132	ref		0	100	ref		0	115	ref		0	118	ref		0	182
supercont1.105:139611	C	T	Substitution	AAEL004012	AAEL004012-RA	P450	cytochrome P450 CYP325AA1	NON_SYNONYMOUS_CODING	431	144	S>N		0.89198	0.74118	0.86853	-	-	-		8.33333	108	ref		18.75	96	C/T		25.641	117	C/T		22.0183	109	ref		8.64198	81	ref		14.6067	89	C/T		13.1579	114	C/T		10.1911	157
supercont1.105:139634	A	T	Substitution	AAEL004012	AAEL004012-RA	P450	cytochrome P450 CYP325AA1	SYNONYMOUS_CODING	408	136	I>I		0.81735	0.84772	0.88853	-	-	-		47.3118	93	A/T		47.4227	97	A/T		50	102	A/T		20.7317	82	ref		23.6842	76	ref		29.3478	92	A/T		37.5	120	A/T		45.2703	148
supercont1.105:139648	A	C	Substitution	AAEL004012	AAEL004012-RA	P450	cytochrome P450 CYP325AA1	NON_SYNONYMOUS_CODING	394	132	L>V		0.86455	0.88643	0.89884	-	-	-		0	105	ref		0	96	ref		0	95	ref		0	77	ref		0	69	ref		0	88	ref		0	108	ref		0	130
supercont1.105:139716	C	T	Substitution	AAEL004012	AAEL004012-RA	P450	cytochrome P450 CYP325AA1	INTRONIC					0.88101	0.87555	0.87662	-	-	-		30.8824	68	ref		25.3521	71	C/T		15.2174	46	C/T		11.7647	68	ref		37.2093	43	ref		43.6364	55	C/T		43.9394	66	C/T		49.2537	67
supercont1.105:139732	A	G	Substitution	AAEL004012	AAEL004012-RA	P450	cytochrome P450 CYP325AA1	INTRONIC					0.83512	0.89017	0.80675	StGe	-	-		24.1935	62	ref		19.1781	73	A/G		12.5	48	A/G		10.7692	65	ref		34.8837	43	ref		37.2549	51	A/G		50.8475	59	A/G		41.2698	63
supercont1.105:139746	A	G	Substitution	AAEL004012	AAEL004012-RA	P450	cytochrome P450 CYP325AA1	INTRONIC					0.88024	0.89564	0.87944	-	-	-		0	64	ref		2.46914	81	ref		0	48	ref		0	56	ref		10.8696	46	ref		2.22222	45	ref		3.63636	55	ref		19.2308	52
supercont1.105:139751	A	C	Substitution	AAEL004012	AAEL004012-RA	P450	cytochrome P450 CYP325AA1	INTRONIC					0.88214	0.82581	0.86201	-	-	-		22.9508	61	ref		25.9259	81	A/C		14.5833	48	A/C		17.3077	52	ref		39.5833	48	A/C		38	50	A/C		35.8491	53	A/C		43.1373	51
supercont1.105:139759	C	T	Substitution	AAEL004012	AAEL004012-RA	P450	cytochrome P450 CYP325AA1	INTRONIC					0.87726	0.88737	0.85494	-	-	-		22.2222	63	ref		20.2532	79	C/T		11.3208	53	C/T		11.7647	51	ref		43.75	48	C/T		48.2759	58	C/T		38.1818	55	C/T		44.4444	54
supercont1.105:139768	C	T	Substitution	AAEL004012	AAEL004012-RA	P450	cytochrome P450 CYP325AA1	ESSENTIAL_SPLICE_SITE					0.8767	0.86494	0.87006	-	-	-		8.64198	81	ref		15.1899	79	C/T		6	50	ref		0	61	ref		0	59	ref		0	62	ref		0	57	ref		0	60
supercont1.105:139827	G	A	Substitution	AAEL004012	AAEL004012-RA	P450	cytochrome P450 CYP325AA1	SYNONYMOUS_CODING	276	92	I>I		0.87783	0.77638	0.87944	-	-	-		0	99	ref		0	92	ref		0	80	ref		20	90	ref		5.31915	94	ref		12.987	77	A/G		3.88349	103	ref		1.62602	123
supercont1.105:139956	C	T	Substitution	AAEL004012	AAEL004012-RA	P450	cytochrome P450 CYP325AA1	SYNONYMOUS_CODING	147	49	L>L		0.87126	0.89447	0.89612	-	-	-		0	125	ref		0	138	ref		0	102	ref		0	128	ref		0	87	ref		0	113	ref		4.61538	130	ref		12.1212	165
supercont1.105:140040	A	G	Substitution	AAEL004012	AAEL004012-RA	P450	cytochrome P450 CYP325AA1	SYNONYMOUS_CODING	63	21	A>A		0.88059	0.88918	0.89989	-	-	-		0	122	ref		0	125	ref		0	113	ref		0	138	ref		0	110	ref		0	116	ref		0	143	ref		0	178
supercont1.105:140051	T	C	Substitution	AAEL004012	AAEL004012-RA	P450	cytochrome P450 CYP325AA1	NON_SYNONYMOUS_CODING	52	18	T>A		0.89396	0.89786	0.88477	-	-	-		11.9403	134	ref		28.125	128	C/T		23.8938	113	C/T		17.7305	141	ref		30.4762	105	C/T		33.6364	110	C/T		10.1449	138	C/T		15.9091	176
supercont1.105:140061	T	C	Substitution	AAEL004012	AAEL004012-RA	P450	cytochrome P450 CYP325AA1	SYNONYMOUS_CODING	42	14	L>L		0.86333	0.79159	0.86779	-	-	-		48.9362	141	C/T		53.4351	131	C/T		42.9907	107	C/T		19.7279	147	ref		37.2549	102	C/T		45.2174	115	C/T		30.597	134	C/T		49.7207	179
supercont1.105:140063	A	G	Substitution	AAEL004012	AAEL004012-RA	P450	cytochrome P450 CYP325AA1	SYNONYMOUS_CODING	40	14	L>L		0.89243	0.87434	0.8789	-	-	-		12.3967	121	ref		23.8462	130	A/G		24.1071	112	A/G		0	133	ref		0	87	ref		0	116	ref		0	138	ref		0.552486	181
supercont1.105:140081	A	G	Substitution	AAEL004012	AAEL004012-RA	P450	cytochrome P450 CYP325AA1	NON_SYNONYMOUS_CODING	22	8	S>P		0.87126	0.88935	0.87209	-	-	-		0	133	ref		0	135	ref		0	110	ref		32.2581	155	A/G		0	105	ref		0.862069	116	ref		0	137	ref		0	160
supercont1.105:665783	A	G	Substitution	AAEL004006	AAEL004006-RA	Synaptic receptor	acetylcholine receptor protein alpha	NON_SYNONYMOUS_CODING	1772	591	V>A		0.88473	0.83562	0.89667	-	-	-		47.541	61	A/G		35.443	79	A/G		54.4444	90	A/G		26.5625	64	ref		5.6338	71	ref		10	80	A/G		9.41177	85	A/G		12.4138	145
supercont1.105:665888	C	T	Substitution	AAEL004006	AAEL004006-RA	Synaptic receptor	acetylcholine receptor protein alpha	NON_SYNONYMOUS_CODING	1667	556	R>H		0.88545	0.88781	0.85952	-	-	-		23.0769	39	ref		11.1111	45	ref		15.7895	57	C/T		0	55	ref		2	50	ref		13.3333	45	C/T		10.7143	56	C/T		11.236	89
supercont1.105:676551	C	T	Substitution	AAEL004006	AAEL004006-RA	Synaptic receptor	acetylcholine receptor protein alpha	INTRONIC					0.89175	0.88098	0.87276	-	-	-		25.3968	63	ref		16.9811	53	C/T		10	50	ref		0	59	ref		0	69	ref		0	45	ref		0	59	ref		0	79
supercont1.105:676572	A	T	Substitution	AAEL004006	AAEL004006-RA	Synaptic receptor	acetylcholine receptor protein alpha	INTRONIC					0.88609	0.88918	0.85878	-	-	-		34.6154	52	A/T		46.9697	66	overlap		36.2319	69	overlap		18.6441	59	ref		0	74	ref		0	65	ref		3.125	64	ref		12.1212	99
supercont1.105:697441	G	T	Substitution	AAEL004006	AAEL004006-RA	Synaptic receptor	acetylcholine receptor protein alpha	INTRONIC					0.8789	0.73777	0.89479	-	-	-		0	48	ref		0	41	ref		0	56	ref		11.4286	35	ref		6.25	32	ref		18.6046	43	G/T		7.69231	39	ref		6.77966	59
supercont1.105:697575	G	A	Substitution	AAEL004006	AAEL004006-RA	Synaptic receptor	acetylcholine receptor protein alpha	SYNONYMOUS_CODING	1092	364	S>S		0.83979	0.86221	0.87341	-	-	-		9.80392	102	ref		10.8696	92	A/G		19	100	A/G		0	70	ref		0	80	ref		0	83	ref		0	89	ref		0	140
supercont1.105:697738	G	C	Substitution	AAEL004006	AAEL004006-RA	Synaptic receptor	acetylcholine receptor protein alpha	INTRONIC					0.85813	0.87969	0.88056	-	-	-		25	32	ref		18.1818	33	C/G		30.7692	39	C/G		0	57	ref		0	48	ref		0	58	ref		0	52	ref		0	62
supercont1.105:697881	C	T	Substitution	AAEL004006	AAEL004006-RA	Synaptic receptor	acetylcholine receptor protein alpha	SYNONYMOUS_CODING	858	286	L>L		0.87274	0.89397	0.83481	-	-	-		81.7204	93	T		78.2609	92	C/T		80.2817	71	C/T		78.2609	69	C/T		54.4118	68	C/T		79.4118	102	C/T		34.5238	84	C/T		37.0968	124
supercont1.105:697935	G	A	Substitution	AAEL004006	AAEL004006-RA	Synaptic receptor	acetylcholine receptor protein alpha	SYNONYMOUS_CODING	804	268	G>G		0.88214	0.84983	0.88305	-	-	-		5.49451	91	ref		13.9785	93	A/G		11.8421	76	A/G		0	85	ref		0	82	ref		0	87	ref		0	107	ref		0	143
supercont1.105:698043	A	G	Substitution	AAEL004006	AAEL004006-RA	Synaptic receptor	acetylcholine receptor protein alpha	SYNONYMOUS_CODING	696	232	N>N		0.88308	0.89801	0.90136	-	-	-		0	115	ref		0	109	ref		0	75	ref		30.7692	91	A/G		0	103	ref		1.28205	78	ref		8.73786	103	A/G		16.25	160
supercont1.105:698184	A	G	Substitution	AAEL004006	AAEL004006-RA	Synaptic receptor	acetylcholine receptor protein alpha	SYNONYMOUS_CODING	555	185	P>P		0.87041	0.84098	0.78917	-	-	-		37.2881	59	A/G		44.2623	61	A/G		38.4615	52	A/G		26.4151	53	ref		6.52174	46	ref		9.80392	51	ref		19.6078	51	A/G		27.1429	70
supercont1.105:698232	C	T	Substitution	AAEL004006	AAEL004006-RA	Synaptic receptor	acetylcholine receptor protein alpha	INTRONIC					0.87126	0.8924	0.87079	-	-	-		11.1111	45	ref		16.2791	43	C/T		18.1818	44	C/T		0	38	ref		6.66667	45	ref		11.1111	36	ref		13.5135	37	C/T		13.2075	53
supercont1.105:699507	G	T	Substitution	AAEL004006	AAEL004006-RA	Synaptic receptor	acetylcholine receptor protein alpha	SPLICE_SITE					0.86959	0.8932	0.81383	-	-	-		0	55	ref		0	60	ref		0	53	ref		0	42	ref		13.5593	59	ref		14.8148	54	G/T		0	44	ref		2.89855	69
supercont1.105:699524	C	T	Substitution	AAEL004006	AAEL004006-RA	Synaptic receptor	acetylcholine receptor protein alpha	INTRONIC					0.88101	0.89498	0.88391	-	-	-		0	42	ref		0	60	ref		0	43	ref		0	40	ref		13.4615	52	ref		15.6863	51	C/T		7.84314	51	ref		4.7619	63
supercont1.105:699545	G	A	Substitution	AAEL004006	AAEL004006-RA	Synaptic receptor	acetylcholine receptor protein alpha	INTRONIC					0.86333	0.85957	0.88592	-	-	-		48.5714	35	A/G		41.1765	51	A/G		44.186	43	A/G		0	33	ref		0	49	ref		0	48	ref		0	43	ref		0	60
supercont1.105:749415	T	A	Substitution	AAEL004006	AAEL004006-RA	Synaptic receptor	acetylcholine receptor protein alpha	INTRONIC					0.8834	0.88781	0.88883	-	-	-		5.66038	53	ref		6.25	48	ref		14.6341	41	A/T		0	46	ref		0	43	ref		5.40541	37	ref		2.5641	39	ref		2.63158	76
supercont1.105:749439	T	A	Substitution	AAEL004006	AAEL004006-RA	Synaptic receptor	acetylcholine receptor protein alpha	INTRONIC					0.88707	0.88509	0.88391	-	-	-		10.4478	67	ref		21.7949	78	A/T		29.6875	64	A/T		0	70	ref		5.35714	56	ref		12.7273	55	A/T		8.16327	49	ref		6.31579	95
supercont1.105:749442	A	G	Substitution	AAEL004006	AAEL004006-RA	Synaptic receptor	acetylcholine receptor protein alpha	INTRONIC					0.89163	0.88226	0.8654	-	-	-		0	66	ref		9.87654	81	ref		14.4928	69	A/G		0	74	ref		0	59	ref		0	56	ref		0	53	ref		0	96
supercont1.105:749478	G	A	Substitution	AAEL004006	AAEL004006-RA	Synaptic receptor	acetylcholine receptor protein alpha	SYNONYMOUS_CODING	171	57	L>L		0.87126	0.85462	0.88958	-	-	-		2.5974	77	ref		7.76699	103	ref		11.1111	108	A/G		0	92	ref		0	73	ref		0	79	ref		0	74	ref		0	126
supercont1.105:749553	T	C	Substitution	AAEL004006	AAEL004006-RA	Synaptic receptor	acetylcholine receptor protein alpha	SYNONYMOUS_CODING	96	32	L>L		0.88978	0.89839	0.89631	-	-	-		67.3913	92	C/T		83.4711	121	C/T		87.1795	117	C/T		39.823	113	C/T		7.21649	97	ref		13.2231	121	C/T		28.7129	101	C/T		17.8771	179
supercont1.1056:92782	G	T	Substitution	AAEL014279	AAEL014279-RA	UGT	glycosyltransferase	NON_SYNONYMOUS_CODING	1635	545	E>D		0.86759	0.90109	0.88391	-	-	-		0	74	ref		0	94	ref		0	119	ref		0	120	ref		11.9048	42	ref		14.4928	69	G/T		24.0506	79	G/T		29.3651	126
supercont1.1056:92799	A	T	Substitution	AAEL014279	AAEL014279-RA	UGT	glycosyltransferase	NON_SYNONYMOUS_CODING	1652	551	E>V		0.88142	0.87434	0.90009	-	-	-		0	61	ref		0	94	ref		0	126	ref		0	111	ref		0	43	ref		0	64	ref		0	78	ref		0	129
supercont1.1056:92814	A	T	Substitution	AAEL014279	AAEL014279-RA	UGT	glycosyltransferase	NON_SYNONYMOUS_CODING	1667	556	Q>L		0.80586	0.9058	0.79898	Nakh	-	-		2.63158	76	ref		1.96078	102	ref		5.88235	119	ref		0.892857	112	ref		35.8974	39	ref		36.6667	60	A/T		59.7222	72	A/T		56.3492	126
supercont1.1056:92824	G	A	Substitution	AAEL014279	AAEL014279-RA	UGT	glycosyltransferase	SYNONYMOUS_CODING	1677	559	P>P		0.85238	0.89685	0.89398	-	-	-		0	73	ref		0	89	ref		0	119	ref		1.21951	82	ref		11.4286	35	ref		14.2857	56	A/G		28.169	71	A/G		33.6283	113
supercont1.1056:92826	A	G	Substitution	AAEL014279	AAEL014279-RA	UGT	glycosyltransferase	NON_SYNONYMOUS_CODING	1679	560	K>R		0.8767	0.90466	0.57797	Cayn; Nakh	-	Yes		2.5974	77	ref		1.11111	90	ref		5.12821	117	ref		1.06383	94	ref		43.75	32	ref		32.7273	55	A/G		53.5211	71	A/G		50.4587	109
supercont1.1056:92896	G	A	Substitution	AAEL014279	AAEL014279-RA	UGT	glycosyltransferase	SYNONYMOUS_CODING	1749	583	S>S		0.84198	0.89087	0.50368	Nakh	-	-		1.23457	81	ref		2.1978	91	ref		2.4	125	ref		0	76	ref		20.5882	34	ref		25.7143	35	A/G		54.5455	33	A/G		59.0164	61
supercont1.1056:92899	G	A	Substitution	AAEL014279	AAEL014279-RA	UGT	glycosyltransferase	SYNONYMOUS_CODING	1752	584	K>K		0.85238	0.9005	0.88592	-	-	-		0	78	ref		0	94	ref		0	128	ref		0	79	ref		26.4706	34	ref		12.8205	39	A/G		5.71429	35	ref		12.5	64
supercont1.1056:92926	C	T	Substitution	AAEL014279	AAEL014279-RA	UGT	glycosyltransferase	SYNONYMOUS_CODING	1779	593	L>L		0.87549	0.90097	0.87944	-	-	-		0	63	ref		0	102	ref		0	132	ref		0	78	ref		4.54545	44	ref		12.5	56	C/T		18.6441	59	C/T		11.7647	102
supercont1.1056:92935	C	T	Substitution	AAEL014279	AAEL014279-RA	UGT	glycosyltransferase	SYNONYMOUS_CODING	1788	596	N>N		0.87549	0.89447	0.88797	-	-	-		0	70	ref		0	101	ref		0	140	ref		0	85	ref		9.09091	55	ref		14.0845	71	C/T		19.403	67	C/T		11.6071	112
supercont1.1056:93007	T	G	Substitution	AAEL014279	AAEL014279-RA	UGT	glycosyltransferase	SPLICE_SITE					0.8834	0.86286	0.89186	-	-	-		100	71	G		100	101	G		100	146	G		100	61	G		100	54	G		100	73	G		100	99	G		100	110
supercont1.1056:93013	G	A	Substitution	AAEL014279	AAEL014279-RA	UGT	glycosyltransferase	ESSENTIAL_SPLICE_SITE					0.88101	0.89307	0.002519	Phet	Thailand	Yes		0	77	ref		0	113	ref		0	155	ref		0	68	ref		6.89655	58	ref		11.6883	77	A/G		11.1111	108	A/G		14.2857	119
supercont1.1056:93017	T	A	Substitution	AAEL014279	AAEL014279-RA	UGT	glycosyltransferase	NON_SYNONYMOUS_CODING	1843	615	S>T		0.8492	0.87434	0.83436	-	-	-		0	77	ref		0	119	ref		0	156	ref		0	74	ref		0	56	ref		0	80	ref		0	109	ref		0	127
supercont1.1056:93070	G	C	Substitution	AAEL014279	AAEL014279-RA	UGT	glycosyltransferase	SYNONYMOUS_CODING	1896	632	L>L		0.89163	0.89893	0.89703	-	-	-		77.7778	108	C		95.0704	142	C		98.3957	187	C		1.85185	108	ref		87.8788	66	C		92.4051	79	C/G		88.0734	109	C/G		95.1049	143
supercont1.1056:93091	G	A	Substitution	AAEL014279	AAEL014279-RA	UGT	glycosyltransferase	SYNONYMOUS_CODING	1917	639	L>L		0.89338	0.9045	0.89479	-	-	-		15.9292	113	ref		3.57143	140	ref		2.04082	196	ref		98.3333	120	A		20	60	ref		8.23529	85	ref		19.7917	96	A/G		9.03226	155
supercont1.1056:93098	C	T	Substitution	AAEL014279	AAEL014279-RA	UGT	glycosyltransferase	SYNONYMOUS_CODING	1924	642	L>L		0.86759	0.88262	0.87411	-	-	-		100	105	T		100	127	T		100	187	T		100	108	T		100	61	T		100	81	T		100	94	T		100	152
supercont1.1056:93139	G	A	Substitution	AAEL014279	AAEL014279-RA	UGT	glycosyltransferase	SYNONYMOUS_CODING	1965	655	T>T		0.89599	0.89636	0.79181	-	-	-		19	100	ref		3.38983	118	ref		6.38298	141	ref		1.02041	98	ref		52	50	A/G		64.0625	64	A/G		79.1045	67	A/G		81.6	125
supercont1.1056:93152	C	A	Substitution	AAEL014279	AAEL014279-RA	UGT	glycosyltransferase	SYNONYMOUS_CODING	1978	660	R>R		0.85087	0.89182	0.73779	Cayn	-	-		100	79	A		100	108	A		100	128	A		42.8571	77	A/C		100	46	A		94.7369	57	A		100	62	A		100	119
supercont1.1056:93160	T	C	Substitution	AAEL014279	AAEL014279-RA	UGT	glycosyltransferase	SYNONYMOUS_CODING	1986	662	I>I		0.87488	0.89649	0.88391	Cayn	-	-		0	85	ref		0	108	ref		0	122	ref		52.5641	78	C/T		0	49	ref		5.55556	54	ref		0	63	ref		0	118
supercont1.106:1720951	C	T	Substitution	AAEL004061	AAEL004061-RA	Synaptic receptor	acetylcholine receptor protein alpha	SYNONYMOUS_CODING	246	82	N>N		0.89472	0.89383	0.90148	Cayn; StGe	-	-		55.8824	34	C/T		80	45	C/T		66.6667	36	C/T		45	40	C/T		94.4444	36	T		86.1111	36	C/T		89.7959	49	C/T		84.507	71
supercont1.106:1832962	AT	A	Deletion	AAEL004061	AAEL004061-RA	Synaptic receptor	acetylcholine receptor protein alpha	INTRONIC					na	na	na	Cayn; Phet	na	-		35	60	ref		25.641	78	A/AT/ATT		16.6667	84	A/AT/ATT		0	11	overlap		43.5484	62	A/AT		30.7692	52	A/AT		28.7879	66	A/AT		34.0426	94
supercont1.106:1832962	AT	ATT	Complex	AAEL004061	AAEL004061-RA	Synaptic receptor	acetylcholine receptor protein alpha	INTRONIC					na	na	na	-	na	-		28	75	ref		24.6914	81	A/AT/ATT		16.092	87	A/AT/ATT		0	61	overlap		37.5	72	overlap		30.1887	53	overlap		28.7879	66	overlap		33.3333	96
supercont1.106:1833073	G	A	Substitution	AAEL004061	AAEL004061-RA	Synaptic receptor	acetylcholine receptor protein alpha	SYNONYMOUS_CODING	954	318	G>G		0.87726	0.89293	0.89081	-	-	-		0	80	ref		0	95	ref		0	108	ref		37.9747	79	A/G		0	84	ref		3.09278	97	ref		0	83	ref		0	117
supercont1.106:1833154	A	C	Substitution	AAEL004061	AAEL004061-RA	Synaptic receptor	acetylcholine receptor protein alpha	INTRONIC					0.88445	0.89564	0.87836	-	-	-		74.6032	63	A/C		81.6667	60	A/C		75.5556	45	A/C		100	43	C		56.8627	51	A/C		47.0588	51	A/C		48.0769	52	A/C		40.9836	61
supercont1.106:1835105	G	T	Substitution	AAEL004061	AAEL004061-RA	Synaptic receptor	acetylcholine receptor protein alpha	SYNONYMOUS_CODING	1008	336	V>V		0.79385	0.89762	0.88592	-	-	-		0	78	ref		0	84	ref		0	90	ref		44.7368	76	G/T		0	77	ref		1.0989	91	ref		0	101	ref		0	152
supercont1.106:1853374	A	T	Substitution	AAEL004061	AAEL004061-RA	Synaptic receptor	acetylcholine receptor protein alpha	SYNONYMOUS_CODING	1440	480	I>I		0.8834	0.89087	0.87478	-	-	-		39.2857	56	A/T		35.6164	73	A/T		27.2727	88	A/T		0	74	ref		6.25	64	ref		5.55556	54	ref		8.69565	69	ref		11.9658	117
supercont1.106:1853461	C	T	Substitution	AAEL004061	AAEL004061-RA	Synaptic receptor	acetylcholine receptor protein alpha	SYNONYMOUS_CODING	1527	509	L>L		0.88545	0.89102	0.89957	-	-	-		0	66	ref		0	83	ref		0	83	ref		52.8571	70	C/T		0	69	ref		0	71	ref		0	77	ref		0	124
supercont1.106:1853542	A	T	Substitution	AAEL004061	AAEL004061-RA	Synaptic receptor	acetylcholine receptor protein alpha	SYNONYMOUS_CODING	1608	536	I>I		0.88024	0.83562	0.90085	-	-	-		100	80	T		100	103	T		100	96	T		36.7521	117	A/T		100	127	T		100	113	T		100	146	T		100	168
supercont1.106:1853547	C	A	Substitution	AAEL004061	AAEL004061-RA	Synaptic receptor	acetylcholine receptor protein alpha	NON_SYNONYMOUS_CODING	1613	538	T>N		0.89454	0.87379	0.88981	-	-	-		0	92	ref		9.80392	102	A/C		8.65385	104	ref		0	124	ref		0	133	ref		0	111	ref		0	147	ref		0	168
supercont1.106:1853731	T	A	Substitution	AAEL004061	AAEL004061-RA	Synaptic receptor	acetylcholine receptor protein alpha	SYNONYMOUS_CODING	1797	599	L>L		0.88521	0.8955	0.84436	-	-	-		29.0323	31	ref		25.5319	47	A/T		37.8788	66	A/T		44	50	A/T		38.6364	44	A/T		62.8571	35	A/T		71.7391	46	A/T		64.5161	62
supercont1.106:1853734	G	A	Substitution	AAEL004061	AAEL004061-RA	Synaptic receptor	acetylcholine receptor protein alpha	SYNONYMOUS_CODING	1800	600	G>G		0.8834	0.88802	0.88305	-	-	-		6.25	32	ref		11.3636	44	ref		22.2222	63	A/G		40	45	A/G		4.7619	42	ref		6.25	32	ref		2.43902	41	ref		8.06452	62
supercont1.106:1862109	G	T	Substitution	AAEL004061	AAEL004061-RA	Synaptic receptor	acetylcholine receptor protein alpha	SYNONYMOUS_CODING	2115	705	T>T		0.8789	0.89087	0.89398	-	-	-		0	67	ref		0	59	ref		0	75	ref		0	73	ref		7.46269	67	ref		0	60	ref		2.27273	88	ref		1.96078	102
supercont1.106:789895	G	A	Substitution	AAEL004054	AAEL004054-RA	P450	cytochrome P450 CYP4G36	SYNONYMOUS_CODING	1660	554	L>L		0.86759	0.86782	0.90188	-	-	-		0	84	ref		0	88	ref		0	97	ref		71.4286	63	A/G		0	56	ref		0	76	ref		0	72	ref		0	149
supercont1.106:789914	T	C	Substitution	AAEL004054	AAEL004054-RA	P450	cytochrome P450 CYP4G36	SYNONYMOUS_CODING	1641	547	E>E		0.85813	0.90262	0.88	Cayn	-	-		54.8387	93	C/T		51.0417	96	C/T		48.6957	115	C/T		100	88	C		44	75	C/T		53.125	96	C/T		53.4884	86	C/T		55.9524	168
supercont1.106:789959	T	C	Substitution	AAEL004054	AAEL004054-RA	P450	cytochrome P450 CYP4G36	SYNONYMOUS_CODING	1596	532	K>K		0.86333	0.88595	0.90218	-	-	-		0	141	ref		0	128	ref		0	133	ref		0	109	ref		0	89	ref		0	125	ref		4.54545	110	ref		5.41872	203
supercont1.106:789968	C	T	Substitution	AAEL004054	AAEL004054-RA	P450	cytochrome P450 CYP4G36	SYNONYMOUS_CODING	1587	529	S>S		0.8667	0.89293	0.88056	-	-	-		0	133	ref		0	127	ref		0	131	ref		33.3333	114	C/T		0	87	ref		0	120	ref		0	113	ref		0	195
supercont1.106:789974	G	A	Substitution	AAEL004054	AAEL004054-RA	P450	cytochrome P450 CYP4G36	SYNONYMOUS_CODING	1581	527	V>V		0.76078	0.88841	0.88853	-	-	-		0	139	ref		0	133	ref		0	124	ref		0	110	ref		0	94	ref		0	117	ref		0	114	ref		0	197
supercont1.106:790019	G	C	Substitution	AAEL004054	AAEL004054-RA	P450	cytochrome P450 CYP4G36	SYNONYMOUS_CODING	1536	512	L>L		0.85087	0.89774	0.88592	-	-	-		0	138	ref		0	127	ref		0	117	ref		42.735	117	C/G		0	103	ref		0.909091	110	ref		0	131	ref		0	191
supercont1.106:790080	A	T	Substitution	AAEL004054	AAEL004054-RA	P450	cytochrome P450 CYP4G36	INTRONIC					0.85521	0.89511	0.89387	-	-	-		0	145	ref		0	132	ref		0	130	ref		35.2941	119	A/T		0	129	ref		3.0303	132	ref		0	125	ref		0	201
supercont1.106:790087	T	A	Substitution	AAEL004054	AAEL004054-RA	P450	cytochrome P450 CYP4G36	INTRONIC					0.86455	0.89368	0.88883	-	-	-		0	139	ref		0	133	ref		0	126	ref		60	115	A/T		0	133	ref		0	135	ref		0	133	ref		0	204
supercont1.106:790090	A	C	Substitution	AAEL004054	AAEL004054-RA	P450	cytochrome P450 CYP4G36	INTRONIC					0.87613	0.8907	0.87478	-	-	-		0	139	ref		0	133	ref		0	121	ref		35.7798	109	A/C		0	131	ref		3.14961	127	ref		0	133	ref		0	197
supercont1.106:790093	G	A	Substitution	AAEL004054	AAEL004054-RA	P450	cytochrome P450 CYP4G36	INTRONIC					0.87274	0.89343	0.87779	-	-	-		0	142	ref		0	137	ref		0	119	ref		35.4545	110	A/G		0	128	ref		2.38095	126	ref		0	126	ref		0	187
supercont1.106:790170	T	C	Substitution	AAEL004054	AAEL004054-RA	P450	cytochrome P450 CYP4G36	SYNONYMOUS_CODING	1455	485	R>R		0.88214	0.89591	0.88981	-	-	-		0	77	ref		0	78	ref		0	87	ref		0	84	ref		6.25	64	ref		7.57576	66	ref		13.4021	97	C/T		20.5128	117
supercont1.106:790467	G	A	Substitution	AAEL004054	AAEL004054-RA	P450	cytochrome P450 CYP4G36	SYNONYMOUS_CODING	1158	386	I>I		0.86858	0.89293	0.88797	-	-	-		0	111	ref		0	127	ref		0	140	ref		33.6842	95	A/G		0	129	ref		0.833333	120	ref		0	131	ref		0	184
supercont1.106:790482	G	A	Substitution	AAEL004054	AAEL004054-RA	P450	cytochrome P450 CYP4G36	SYNONYMOUS_CODING	1143	381	G>G		0.87488	0.89156	0.88999	-	-	-		0	110	ref		0	136	ref		0	144	ref		35.1064	94	A/G		0	127	ref		1.69492	118	ref		0	127	ref		0	192
supercont1.106:790610	G	A	Substitution	AAEL004054	AAEL004054-RA	P450	cytochrome P450 CYP4G36	SYNONYMOUS_CODING	1015	339	L>L		0.88366	0.88411	0.84871	-	-	-		0	159	ref		0	163	ref		0	174	ref		0	180	ref		0	173	ref		0	174	ref		0	170	ref		0	240
supercont1.106:790698	A	C	Substitution	AAEL004054	AAEL004054-RA	P450	cytochrome P450 CYP4G36	SYNONYMOUS_CODING	927	309	S>S		0.89243	0.9058	0.90526	Cayn	-	-		55.2147	163	A/C		38.9222	167	A/C		53.2544	169	A/C		98.5148	202	C		41.3333	150	A/C		52.1739	184	A/C		56.4706	170	A/C		55.2743	237
supercont1.106:790754	C	A	Substitution	AAEL004054	AAEL004054-RA	P450	cytochrome P450 CYP4G36	NON_SYNONYMOUS_CODING	871	291	A>S		0.88142	0.88781	0.89138	-	-	-		0	124	ref		0	143	ref		0	174	ref		0	157	ref		0	128	ref		0	146	ref		0	145	ref		0	225
supercont1.106:790901	G	T	Substitution	AAEL004054	AAEL004054-RA	P450	cytochrome P450 CYP4G36	NON_SYNONYMOUS_CODING	724	242	L>I		0.88473	0.87253	0.88056	-	-	-		11.828	93	ref		21.8391	87	G/T		30.6122	98	G/T		0	124	ref		0	95	ref		0	97	ref		0	91	ref		0	139
supercont1.106:804231	C	A	Substitution	AAEL004054	AAEL004054-RA	P450	cytochrome P450 CYP4G36	SYNONYMOUS_CODING	522	174	V>V		0.8921	0.86494	0.90276	Cayn; StGe	-	-		57.1429	63	A/C		47.3684	76	A/C		56.1798	89	A/C		100	72	A		29.4872	78	ref		54.8387	62	A/C		46.5517	58	A/C		55.3719	121
supercont1.106:807843	G	A	Substitution	AAEL004054	AAEL004054-RA	P450	cytochrome P450 CYP4G36	INTRONIC					0.89163	0.88015	0.86124	-	-	-		8.33333	84	ref		20.5128	78	A/G		29.3333	75	A/G		0	70	ref		0	62	ref		0	57	ref		0	73	ref		0	96
supercont1.106:807949	T	C	Substitution	AAEL004054	AAEL004054-RA	P450	cytochrome P450 CYP4G36	SYNONYMOUS_CODING	330	110	L>L		0.88906	0.8712	0.90474	StGe	-	-		51.2605	119	C/T		33.813	139	C/T		53.3835	133	C/T		100	107	C		34.1463	123	C/T		37.6	125	C/T		42.3423	111	C/T		51.4451	173
supercont1.106:807970	C	T	Substitution	AAEL004054	AAEL004054-RA	P450	cytochrome P450 CYP4G36	SYNONYMOUS_CODING	309	103	V>V		0.89044	0.90564	0.90427	StGe	-	-		50.7692	130	C/T		37.3239	142	C/T		52.4823	141	C/T		99.0991	111	T		34.375	128	C/T		34.5588	136	C/T		37.6068	117	C/T		50.5747	174
supercont1.106:807997	A	G	Substitution	AAEL004054	AAEL004054-RA	P450	cytochrome P450 CYP4G36	SYNONYMOUS_CODING	282	94	I>I		0.88521	0.90576	0.90316	Cayn; StGe	-	-		51.2	125	A/G		33.0645	124	A/G		49.6124	129	A/G		97.8947	95	G		30.0813	123	A/G		38.3333	120	A/G		34.9515	103	A/G		50.3067	163
supercont1.106:820917	C	T	Substitution	AAEL004054	AAEL004054-RA	P450	cytochrome P450 CYP4G36	SYNONYMOUS_CODING	9	3	A>A		0.86959	0.89459	0.87079	-	-	-		0	105	ref		0	96	ref		0	109	ref		0	91	ref		14.5631	103	ref		7.40741	81	ref		10.7143	112	C/T		18.4615	195
supercont1.107:2094578	A	G	Substitution	AAEL004112	AAEL004112-RA	Red/Ox	thioredoxin Peroxidase TPX2	SYNONYMOUS_CODING	567	189	N>N		0.83979	0.88667	0.8984	-	-	-		100	84	G		100	72	G		100	67	G		100	72	G		94.382	89	G		94.6809	94	G		100	81	G		100	113
supercont1.107:2094581	G	A	Substitution	AAEL004112	AAEL004112-RA	Red/Ox	thioredoxin Peroxidase TPX2	SYNONYMOUS_CODING	564	188	F>F		0.82275	0.90559	0.87662	-	-	-		0	81	ref		0	73	ref		0	66	ref		94.2857	70	A		52.809	89	A/G		47	100	A/G		30.2326	86	A/G		32.7434	113
supercont1.107:2094590	C	T	Substitution	AAEL004112	AAEL004112-RA	Red/Ox	thioredoxin Peroxidase TPX2	SYNONYMOUS_CODING	555	185	K>K		0.31722	0.88338	0.87006	-	-	-		75	80	C/T		100	79	T		100	66	T		1.38889	72	ref		13.8298	94	ref		21.5054	93	C/T		9.63855	83	C/T		11.9266	109
supercont1.107:2094725	C	T	Substitution	AAEL004112	AAEL004112-RA	Red/Ox	thioredoxin Peroxidase TPX2	SYNONYMOUS_CODING	420	140	L>L		0.89017	0.89131	0.89301	-	-	-		14.0187	107	ref		0	86	ref		0	94	ref		0	81	ref		13.4831	89	ref		17.9775	89	C/T		13.2653	98	C/T		18.5185	135
supercont1.107:2095025	G	A	Substitution	AAEL004112	AAEL004112-RA	Red/Ox	thioredoxin Peroxidase TPX2	SYNONYMOUS_CODING	120	40	D>D		0.87274	0.8941	0.88305	-	-	-		0	112	ref		0	101	ref		0	126	ref		0	115	ref		2.5	120	ref		5.31915	94	ref		8.95522	134	A/G		4.19162	167
supercont1.107:2110877	T	C	Substitution	AAEL004086	AAEL004086-RA	Other detox	aldo-keto reductase	5PRIME_UTR	25				0.87936	0.89043	0.89989	-	-	-		100	72	C		100	91	C		100	67	C		100	93	C		85.0467	107	C		83.9506	81	C/T		100	104	C		99.0909	110
supercont1.107:2110879	T	C	Substitution	AAEL004086	AAEL004086-RA	Other detox	aldo-keto reductase	5PRIME_UTR	27				0.51032	0.88226	0.89703	-	-	-		88.3117	77	C		100	89	C		100	66	C		7.86517	89	ref		10.4762	105	ref		8.64198	81	ref		23.8095	105	C/T		17.1171	111
supercont1.107:2110897	G	A	Substitution	AAEL004086	AAEL004086-RA	Other detox	aldo-keto reductase	5PRIME_UTR	45				0.80586	0.90408	0.90032	-	-	-		0	67	ref		0	64	ref		0	44	ref		92.5	80	A		37.7551	98	A/G		32.0513	78	A/G		40.4255	94	A/G		38.6139	101
supercont1.107:2111219	T	G	Substitution	AAEL004086	AAEL004086-RA	Other detox	aldo-keto reductase	INTRONIC					0.88214	0.88918	0.89376	-	-	-		100	56	G		98.3871	62	G		100	39	G		100	53	G		95.3488	43	G		87.2727	55	G/T		100	54	G		98.7013	77
supercont1.107:2111227	C	T	Substitution	AAEL004086	AAEL004086-RA	Other detox	aldo-keto reductase	INTRONIC					0.84769	0.9052	0.89376	-	-	-		0	60	ref		0	65	ref		0	52	ref		93.6508	63	T		36.2069	58	C/T		36.9231	65	C/T		38.4615	65	C/T		34.1772	79
supercont1.107:2111238	T	A	Substitution	AAEL004086	AAEL004086-RA	Other detox	aldo-keto reductase	INTRONIC					0.86959	0.88802	0.80621	-	-	-		3.22581	62	ref		2.7027	74	ref		5.06329	79	ref		11.1111	81	ref		0	79	ref		0	80	ref		1.33333	75	ref		0	94
supercont1.107:2111244	T	A	Substitution	AAEL004086	AAEL004086-RA	Other detox	aldo-keto reductase	INTRONIC					0.8667	0.88411	0.79617	-	-	-		5.88235	68	ref		2.5974	77	ref		6.0241	83	ref		11.6279	86	ref		0	83	ref		0	83	ref		1.21951	82	ref		0	98
supercont1.107:2111252	A	C	Substitution	AAEL004086	AAEL004086-RA	Other detox	aldo-keto reductase	INTRONIC					0.86455	0.90391	0.86454	-	-	-		0	74	ref		0	83	ref		0	88	ref		0	98	ref		13.6364	88	ref		16.092	87	A/C		20.9302	86	A/C		13.7615	109
supercont1.107:2111281	C	T	Substitution	AAEL004086	AAEL004086-RA	Other detox	aldo-keto reductase	SYNONYMOUS_CODING	205	31	G>G		0.42083	0.88667	0.82739	-	-	-		53.2258	62	C/T		94.2149	121	T		94.5455	110	T		0	124	ref		4.6729	107	ref		3.33333	120	ref		0.900901	111	ref		0.628931	159
supercont1.107:2111311	G	T	Substitution	AAEL004086	AAEL004086-RA	Other detox	aldo-keto reductase	SYNONYMOUS_CODING	235	41	A>A		0.88181	0.80407	0.89567	-	-	-		0	121	ref		0	118	ref		0	143	ref		0	139	ref		0	114	ref		0	116	ref		28.3333	120	G/T		15.7895	190
supercont1.107:2111314	A	C	Substitution	AAEL004086	AAEL004086-RA	Other detox	aldo-keto reductase	SYNONYMOUS_CODING	238	42	G>G		0.8767	0.89212	0.89042	-	-	-		0	118	ref		0	122	ref		0	130	ref		0	129	ref		9.16667	120	ref		11.1111	108	A/C		7.62712	118	ref		18.9474	190
supercont1.107:2111402	T	C	Substitution	AAEL004086	AAEL004086-RA	Other detox	aldo-keto reductase	NON_SYNONYMOUS_CODING	326	72	C>R		0.89017	0.90331	0.80188	-	-	-		10.6557	122	ref		0	137	ref		0	135	ref		0	174	ref		15.6463	147	ref		16.7883	137	C/T		31.6176	136	C/T		35.2423	227
supercont1.107:2111404	C	T	Substitution	AAEL004086	AAEL004086-RA	Other detox	aldo-keto reductase	SYNONYMOUS_CODING	328	72	C>C		0.8735	0.84251	0.86036	-	-	-		0.877193	114	ref		0	135	ref		0	133	ref		0	169	ref		0	138	ref		0	134	ref		21.374	131	C/T		15.3153	222
supercont1.107:2111422	G	C	Substitution	AAEL004086	AAEL004086-RA	Other detox	aldo-keto reductase	SYNONYMOUS_CODING	346	78	V>V		0.87978	0.89605	0.87478	-	-	-		16.6667	96	ref		0	106	ref		0	103	ref		0	170	ref		1.27389	157	ref		0.775194	129	ref		16.0839	143	C/G		18.1818	231
supercont1.107:2111448	G	A	Substitution	AAEL004086	AAEL004086-RA	Other detox	aldo-keto reductase	INTRONIC					0.88743	0.88595	0.88305	-	-	-		41.6667	48	A/G		80.9524	42	A/G		90.4762	42	A/G		0	155	ref		1.35135	148	ref		1.66667	120	ref		0.719425	139	ref		1.31579	228
supercont1.107:2111452	A	T	Substitution	AAEL004086	AAEL004086-RA	Other detox	aldo-keto reductase	INTRONIC					0.89472	0.88475	0.88933	-	-	-		44.186	43	A/T		81.8182	44	A/T		90.6977	43	A/T		0	153	ref		1.3245	151	ref		1.5748	127	ref		0.719425	139	ref		1.40187	214
supercont1.107:2111454	T	A	Substitution	AAEL004086	AAEL004086-RA	Other detox	aldo-keto reductase	INTRONIC					0.86959	0.8932	0.86201	-	-	-		15	40	ref		18.6046	43	A/T		11.3636	44	A/T		13.3758	157	ref		0	151	ref		0	125	ref		3.5461	141	ref		0	211
supercont1.107:2111470	T	C	Substitution	AAEL004086	AAEL004086-RA	Other detox	aldo-keto reductase	INTRONIC					0.88834	0.87875	0.89081	-	-	-		42.3077	52	C/T		84.6154	39	C/T		88.8889	36	C/T		0	155	ref		2.61438	153	ref		0.819672	122	ref		0.684932	146	ref		0	183
supercont1.107:2111472	G	A	Substitution	AAEL004086	AAEL004086-RA	Other detox	aldo-keto reductase	INTRONIC					0.88473	0.89131	0.88592	-	-	-		49.1228	57	A/G		86.3636	44	A/G		88.8889	36	A/G		0	145	ref		2.83688	141	ref		0.833333	120	ref		1.38889	144	ref		0	185
supercont1.107:2111476	T	A	Substitution	AAEL004086	AAEL004086-RA	Other detox	aldo-keto reductase	INTRONIC					0.84588	0.8941	0.89387	-	-	-		9.83606	61	ref		11.5385	52	A/T		7.89474	38	ref		10.3448	145	ref		0	139	ref		0	119	ref		4.92958	142	ref		0	179
supercont1.107:2111523	G	A	Substitution	AAEL004086	AAEL004086-RA	Other detox	aldo-keto reductase	INTRONIC					0.64384	0.89145	0.88592	-	-	-		70.3704	108	A/G		96.2121	132	A		97.2477	109	A		0	126	ref		8.39161	143	ref		3.27869	122	ref		1.62602	123	ref		1.30719	153
supercont1.107:2111544	T	A	Substitution	AAEL004086	AAEL004086-RA	Other detox	aldo-keto reductase	INTRONIC					0.88278	0.85713	0.90458	-	-	-		0	107	ref		0	157	ref		0	124	ref		0	130	ref		0	120	ref		0	120	ref		0	134	ref		0	174
supercont1.107:2111547	G	A	Substitution	AAEL004086	AAEL004086-RA	Other detox	aldo-keto reductase	INTRONIC					0.87274	0.90524	0.90009	StGe	-	-		0	110	ref		0	157	ref		0	120	ref		93.7985	129	A		34.6457	127	A/G		26.6667	120	A/G		30.8271	133	A/G		45.4023	174
supercont1.107:2111622	T	C	Substitution	AAEL004086	AAEL004086-RA	Other detox	aldo-keto reductase	SYNONYMOUS_CODING	370	86	D>D		0.85521	0.9005	0.37055	-	-	-		23.4043	94	ref		2.4	125	ref		3.57143	112	ref		100	127	C		71.1864	118	C/T		63.6364	121	C/T		66.6667	120	C/T		54.9383	162
supercont1.107:2111628	A	C	Substitution	AAEL004086	AAEL004086-RA	Other detox	aldo-keto reductase	NON_SYNONYMOUS_CODING	376	88	K>N		0.86959	0.89459	0.88698	-	-	-		0	97	ref		0	124	ref		0	117	ref		0	127	ref		18.1102	127	ref		22.8346	127	A/C		13.9535	129	A/C		21.6867	166
supercont1.107:2111643	T	C	Substitution	AAEL004086	AAEL004086-RA	Other detox	aldo-keto reductase	SYNONYMOUS_CODING	391	93	Y>Y		0.85669	0.90293	0.83651	-	-	-		100	97	C		100	138	C		100	105	C		100	114	C		71.5385	130	C/T		66.129	124	C/T		85.8209	134	C/T		75.625	160
supercont1.107:2111649	G	T	Substitution	AAEL004086	AAEL004086-RA	Other detox	aldo-keto reductase	SYNONYMOUS_CODING	397	95	A>A		0.88707	0.89944	0.90474	-	-	-		91.7526	97	T		97.6923	130	T		97.3214	112	T		98.1308	107	T		69.5312	128	G/T		64.6018	113	G/T		63.0769	130	G/T		63.2911	158
supercont1.107:2111667	C	T	Substitution	AAEL004086	AAEL004086-RA	Other detox	aldo-keto reductase	SYNONYMOUS_CODING	415	101	F>F		0.88635	0.88714	0.78621	-	-	-		10.8696	92	ref		3.2	125	ref		1.90476	105	ref		3.09278	97	ref		0	107	ref		0	124	ref		3.38983	118	ref		0	161
supercont1.107:2111688	C	A	Substitution	AAEL004086	AAEL004086-RA	Other detox	aldo-keto reductase	NON_SYNONYMOUS_CODING	436	108	D>E		0.87783	0.89087	0.90359	-	-	-		3.88349	103	ref		0	118	ref		0	94	ref		0	88	ref		10.9091	110	ref		25	108	A/C		6.30631	111	ref		1.875	160
supercont1.107:2111721	A	T	Substitution	AAEL004086	AAEL004086-RA	Other detox	aldo-keto reductase	SYNONYMOUS_CODING	469	119	T>T		0.55299	0.90408	0.90385	-	-	-		12.7451	102	ref		0	108	ref		0	96	ref		98.9011	91	T		60.1852	108	A/T		70.3704	108	A/T		83.4951	103	A/T		75.8389	149
supercont1.107:2111727	G	A	Substitution	AAEL004086	AAEL004086-RA	Other detox	aldo-keto reductase	SYNONYMOUS_CODING	475	121	K>K		0.88024	0.90063	0.87341	-	-	-		0	115	ref		0	111	ref		0	97	ref		0	105	ref		0.909091	110	ref		0	111	ref		19.6262	107	A/G		11.2676	142
supercont1.107:2111730	T	C	Substitution	AAEL004086	AAEL004086-RA	Other detox	aldo-keto reductase	SYNONYMOUS_CODING	478	122	V>V		0.89443	0.90314	0.87341	-	-	-		6.30631	111	ref		0	108	ref		0	99	ref		0	110	ref		2.5	120	ref		0	107	ref		19.8113	106	C/T		10.5634	142
supercont1.107:2111737	A	C	Substitution	AAEL004086	AAEL004086-RA	Other detox	aldo-keto reductase	NON_SYNONYMOUS_CODING	485	125	I>L		0.86759	0.88802	0.89061	-	-	-		0	109	ref		0	117	ref		0	105	ref		0	108	ref		0	127	ref		0	107	ref		17.757	107	A/C		19.3103	145
supercont1.107:2111787	A	G	Substitution	AAEL004086	AAEL004086-RA	Other detox	aldo-keto reductase	SYNONYMOUS_CODING	535	141	E>E		0.85953	0.89725	0.89376	-	-	-		0	101	ref		0	105	ref		0	93	ref		0	108	ref		13.1313	99	ref		16.3043	92	A/G		12.381	105	A/G		17.7305	141
supercont1.107:2111796	C	T	Substitution	AAEL004086	AAEL004086-RA	Other detox	aldo-keto reductase	SYNONYMOUS_CODING	544	144	I>I		0.89004	0.9005	0.89398	-	-	-		88.2979	94	T		95.9184	98	T		95.8763	97	T		0.961538	104	ref		22.2222	90	ref		44.3182	88	C/T		24.2105	95	C/T		13.5338	133
supercont1.107:2111844	A	C	Substitution	AAEL004086	AAEL004086-RA	Other detox	aldo-keto reductase	SYNONYMOUS_CODING	592	160	R>R		0.8767	0.90271	0.89589	-	-	-		74.5763	59	A/C		82	50	A/C		93.3333	30	C		0.813008	123	ref		22.619	84	ref		44.4444	81	A/C		29.7619	84	A/C		19.2	125
supercont1.107:2111925	G	A	Substitution	AAEL004086	AAEL004086-RA	Other detox	aldo-keto reductase	SYNONYMOUS_CODING	673	187	K>K		0.88654	0.90063	0.89578	-	-	-		76.1194	67	A/G		85.7143	49	A/G		88.0952	42	A/G		0	134	ref		24.6914	81	ref		50.5155	97	A/G		30.1587	63	A/G		22.1239	113
supercont1.107:2111934	C	T	Substitution	AAEL004086	AAEL004086-RA	Other detox	aldo-keto reductase	SYNONYMOUS_CODING	682	190	D>D		0.89573	0.90022	0.90218	-	-	-		65.3846	78	C/T		87.931	58	C/T		93.4426	61	T		0	127	ref		11.3636	88	ref		9.90099	101	C/T		25	64	C/T		27.6423	123
supercont1.107:2111976	G	A	Substitution	AAEL004086	AAEL004086-RA	Other detox	aldo-keto reductase	SYNONYMOUS_CODING	724	204	E>E		0.8911	0.88897	0.8654	StGe	-	-		14.0845	71	ref		4.91803	61	ref		1.72414	58	ref		100	82	A		39.7727	88	A/G		25.641	78	A/G		33.871	62	A/G		48.1481	108
supercont1.107:2111988	G	A	Substitution	AAEL004086	AAEL004086-RA	Other detox	aldo-keto reductase	SYNONYMOUS_CODING	736	208	K>K		0.88473	0.8712	0.84939	StGe	-	-		81.0345	58	A		91.1111	45	A/G		94.8718	39	A		0	78	ref		34.1463	82	A/G		56.5217	69	A/G		61.4035	57	A/G		51.9608	102
supercont1.107:2112021	A	G	Substitution	AAEL004086	AAEL004086-RA	Other detox	aldo-keto reductase	SYNONYMOUS_CODING	769	219	R>R		0.8735	0.90145	0.90043	StGe	-	-		52.6316	57	A/G		93.0233	43	A/G		88.3721	43	A/G		90.3226	62	G		35.9375	64	A/G		27.3973	73	A/G		35.7143	56	A/G		52.9412	85
supercont1.107:2112057	G	A	Substitution	AAEL004086	AAEL004086-RA	Other detox	aldo-keto reductase	SYNONYMOUS_CODING	805	231	K>K		0.88762	0.90338	0.88933	-	-	-		9.09091	99	ref		0	95	ref		0	105	ref		0	100	ref		22.619	84	ref		18.75	112	A/G		31.5068	73	A/G		21.4876	121
supercont1.107:2112067	T	C	Substitution	AAEL004086	AAEL004086-RA	Other detox	aldo-keto reductase	NON_SYNONYMOUS_CODING	815	235	S>P		0.8885	0.89182	0.84436	-	-	-		100	109	C		100	117	C		100	115	C		100	103	C		95.1807	83	C		89.4737	114	C/T		100	76	C		98.4496	129
supercont1.107:2112087	C	T	Substitution	AAEL004086	AAEL004086-RA	Other detox	aldo-keto reductase	SYNONYMOUS_CODING	835	241	N>N		0.88707	0.89866	0.88257	-	-	-		8.41122	107	ref		0	137	ref		0	136	ref		0	107	ref		1.0101	99	ref		0	142	ref		10.989	91	C/T		13.986	143
supercont1.107:2112105	C	T	Substitution	AAEL004086	AAEL004086-RA	Other detox	aldo-keto reductase	SYNONYMOUS_CODING	853	247	F>F		0.88891	0.89981	0.88592	-	-	-		7.47664	107	ref		0	140	ref		0	123	ref		0	100	ref		1.78571	112	ref		0	133	ref		13.3333	90	C/T		10.219	137
supercont1.107:2112147	T	C	Substitution	AAEL004086	AAEL004086-RA	Other detox	aldo-keto reductase	SYNONYMOUS_CODING	895	261	H>H		0.88214	0.90176	0.90257	-	-	-		91.5663	83	C		100	125	C		100	103	C		100	96	C		67.8261	115	C/T		46.6667	105	C/T		88.5417	96	C/T		96.1539	130
supercont1.107:2112168	G	A	Substitution	AAEL004086	AAEL004086-RA	Other detox	aldo-keto reductase	SYNONYMOUS_CODING	916	268	P>P		0.88473	0.86494	0.80361	-	-	-		2.63158	76	ref		0	122	ref		4.5977	87	ref		3.79747	79	ref		0	98	ref		0	85	ref		2.46914	81	ref		0	119
supercont1.107:2112177	C	T	Substitution	AAEL004086	AAEL004086-RA	Other detox	aldo-keto reductase	SYNONYMOUS_CODING	925	271	L>L		0.77897	0.90303	0.90228	-	-	-		90.9091	77	T		100	122	T		100	79	T		100	75	T		67.0213	94	C/T		41.7722	79	C/T		82.1918	73	C/T		96.3303	109
supercont1.107:2112225	G	T	Substitution	AAEL004086	AAEL004086-RA	Other detox	aldo-keto reductase	3PRIME_UTR	973				0.86083	0.85593	0.8289	StGe	-	-		0	79	ref		0	96	ref		0	48	ref		100	17	lc		10.9091	55	ref		0	62	ref		13.1579	38	G/T		28.8889	45
supercont1.107:2112248	G	A	Substitution	AAEL004086	AAEL004086-RA	Other detox	aldo-keto reductase	3PRIME_UTR	996				0.10077	0.89774	0.89691	StGe	-	-		40.5797	69	A/G		0	72	ref		0	39	ref		0	17	lc		29.8246	57	ref		33.9286	56	overlap		54.7619	42	overlap		20	45
supercont1.107:2112250	A	T	Substitution	AAEL004086	AAEL004086-RA	Other detox	aldo-keto reductase	3PRIME_UTR	998				0.21641	0.90085	0.53397	-	-	-		31.3433	67	ref		0	69	ref		0	37	ref		100	20	lc		48.2143	56	A/T		40.3509	57	overlap		73.1707	41	overlap		54.1667	48
supercont1.107:2112265	A	T	Substitution	AAEL004086	AAEL004086-RA	Other detox	aldo-keto reductase	3PRIME_UTR	1013				0.86959	0.8932	0.89884	-	-	-		100	69	T		100	53	T		100	30	T		100	25	lc		83.0769	65	T		83.6735	49	A/T		100	46	T		96.7742	62
supercont1.107:2112272	G	A	Substitution	AAEL004086	AAEL004086-RA	Other detox	aldo-keto reductase	3PRIME_UTR	1020				0.19742	0.87314	0.87209	-	-	-		23.8095	63	ref		86.3636	44	A/G		86.6667	30	A/G		0	36	ref		0	64	ref		0	58	ref		0	53	ref		0	67
supercont1.107:2112464	C	T	Substitution	AAEL004095	AAEL004095-RA	Other detox	aldo-keto reductase	5PRIME_UTR	18				0.82791	0.90461	0.90228	StGe	-	-		0	128	ref		0	124	ref		0	173	ref		92.1986	141	T		32.8125	128	C/T		34.2857	175	C/T		32.1168	137	C/T		40.8867	203
supercont1.107:2112537	C	T	Substitution	AAEL004095	AAEL004095-RA	Other detox	aldo-keto reductase	SYNONYMOUS_CODING	91	15	L>L		0.87488	0.88475	0.85781	-	-	-		6.60377	106	ref		0.990099	101	ref		5.92593	135	ref		9.25926	108	ref		0	98	ref		0	133	ref		3.1746	126	ref		0	185
supercont1.107:2112553	G	A	Substitution	AAEL004095	AAEL004095-RA	Other detox	aldo-keto reductase	NON_SYNONYMOUS_CODING	107	21	G>S		0.88521	0.88802	0.90115	-	-	-		0	110	ref		0	99	ref		0	118	ref		0	87	ref		0	97	ref		0	111	ref		0	109	ref		0	156
supercont1.107:2112587	T	A	Substitution	AAEL004095	AAEL004095-RA	Other detox	aldo-keto reductase	INTRONIC					0.72569	0.90154	0.89154	-	-	-		0	57	ref		0	68	ref		0	77	ref		0	47	ref		19.697	66	ref		10.8108	74	A/T		21.6667	60	A/T		17.9775	89
supercont1.107:2112836	G	A	Substitution	AAEL004095	AAEL004095-RA	Other detox	aldo-keto reductase	SPLICE_SITE					0.86083	0.90282	0.82685	-	-	-		14.7541	61	ref		0	63	ref		5.7971	69	ref		12.5	48	ref		6.66667	60	ref		12.2807	57	A/G		47.3684	57	A/G		33.3333	75
supercont1.107:2112851	C	T	Substitution	AAEL004095	AAEL004095-RA	Other detox	aldo-keto reductase	SYNONYMOUS_CODING	136	30	D>D		0.83763	0.89564	0.89442	-	-	-		0	65	ref		0	77	ref		0	83	ref		0	55	ref		9.21053	76	ref		10.2941	68	C/T		13.4328	67	C/T		13.6842	95
supercont1.107:2112858	T	A	Substitution	AAEL004095	AAEL004095-RA	Other detox	aldo-keto reductase	NON_SYNONYMOUS_CODING	143	33	C>S		0.8735	0.90251	0.85952	-	-	-		14.0845	71	ref		0	74	ref		5.68182	88	ref		9.52381	63	ref		8.86076	79	ref		11.4286	70	A/T		45.5882	68	A/T		39.2157	102
supercont1.107:2112860	C	T	Substitution	AAEL004095	AAEL004095-RA	Other detox	aldo-keto reductase	SYNONYMOUS_CODING	145	33	C>C		0.8834	0.88861	0.88909	-	-	-		0	72	ref		0	74	ref		0	90	ref		0	67	ref		2.5974	77	ref		0	72	ref		6.94444	72	ref		15.0943	106
supercont1.107:2112929	A	G	Substitution	AAEL004095	AAEL004095-RA	Other detox	aldo-keto reductase	SYNONYMOUS_CODING	214	56	E>E		0.84769	0.89459	0.89398	-	-	-		0	94	ref		0	77	ref		0	84	ref		0	71	ref		8.64198	81	ref		10.6061	66	A/G		8.86076	79	ref		12.931	116
supercont1.107:2112934	T	C	Substitution	AAEL004095	AAEL004095-RA	Other detox	aldo-keto reductase	NON_SYNONYMOUS_CODING	219	58	V>A		0.88024	0.89307	0.89154	-	-	-		100	83	C		98.7654	81	C		100	87	C		100	71	C		89.3333	75	C		75.7143	70	C/T		100	78	C		98.3051	118
supercont1.107:2112953	A	T	Substitution	AAEL004095	AAEL004095-RA	Other detox	aldo-keto reductase	SYNONYMOUS_CODING	238	64	R>R		0.87274	0.89535	0.89753	-	-	-		0	80	ref		0	84	ref		0	96	ref		0	81	ref		2.63158	76	ref		10.4478	67	A/T		9.63855	83	ref		8.49057	106
supercont1.107:2112967	A	G	Substitution	AAEL004095	AAEL004095-RA	Other detox	aldo-keto reductase	NON_SYNONYMOUS_CODING	252	69	E>G		0.88024	0.89397	0.8821	-	-	-		0	80	ref		0	89	ref		0	98	ref		0	80	ref		1.2987	77	ref		0	74	ref		10.5882	85	A/G		10.2804	107
supercont1.107:2112974	C	T	Substitution	AAEL004095	AAEL004095-RA	Other detox	aldo-keto reductase	SYNONYMOUS_CODING	259	71	V>V		0.85087	0.90242	0.89315	StGe	-	-		0	77	ref		0	86	ref		0	92	ref		88.3721	86	T		45.9459	74	C/T		36.1111	72	C/T		33.75	80	C/T		47.6191	105
supercont1.107:2113016	A	G	Substitution	AAEL004095	AAEL004095-RA	Other detox	aldo-keto reductase	INTRONIC					0.88394	0.86424	0.88733	-	-	-		0	53	ref		0	61	ref		0	56	ref		0	57	ref		0	41	ref		0	54	ref		27.6596	47	A/G		15.625	64
supercont1.107:2113018	T	G	Substitution	AAEL004095	AAEL004095-RA	Other detox	aldo-keto reductase	INTRONIC					0.87726	0.87055	0.87006	-	-	-		5.76923	52	ref		0	59	ref		3.57143	56	ref		7.40741	54	ref		0	45	ref		0	54	ref		4.65116	43	ref		1.5873	63
supercont1.107:2114925	G	A	Substitution	AAEL004095	AAEL004095-RA	Other detox	aldo-keto reductase	NON_SYNONYMOUS_CODING	339	98	G>E		0.87274	0.79808	0.89467	-	-	-		7.5	80	ref		0	74	ref		6.31579	95	ref		6	100	ref		17.3333	75	ref		10.3093	97	ref		17.9775	89	A/G		28.3582	134
supercont1.107:2114938	A	T	Substitution	AAEL004095	AAEL004095-RA	Other detox	aldo-keto reductase	NON_SYNONYMOUS_CODING	352	102	E>D		0.88978	0.89511	0.89927	-	-	-		5.20833	96	ref		0	94	ref		5.04202	119	ref		9.3458	107	ref		0	89	ref		0	120	ref		11.215	107	A/T		18.543	151
supercont1.107:2114965	T	G	Substitution	AAEL004095	AAEL004095-RA	Other detox	aldo-keto reductase	SYNONYMOUS_CODING	379	111	L>L		0.89057	0.89698	0.88883	-	-	-		5.64516	124	ref		0	108	ref		5.26316	133	ref		9.2437	119	ref		0	112	ref		0	136	ref		15.748	127	G/T		17.3684	190
supercont1.107:2114984	T	C	Substitution	AAEL004095	AAEL004095-RA	Other detox	aldo-keto reductase	NON_SYNONYMOUS_CODING	398	118	F>L		0.2636	0.89264	0.90523	-	-	-		64.2336	137	C/T		98.5294	136	C		94.4056	143	C		0	135	ref		6.97674	129	ref		5.7971	138	ref		0.78125	128	ref		3.34928	209
supercont1.107:2115022	C	A	Substitution	AAEL004095	AAEL004095-RA	Other detox	aldo-keto reductase	SYNONYMOUS_CODING	436	130	R>R		0.87419	0.88918	0.89873	-	-	-		6.89655	145	ref		2.12766	141	ref		6.04396	182	ref		5.67376	141	ref		0	114	ref		0	131	ref		20.1754	114	A/C		20.3791	211
supercont1.107:2115030	T	C	Substitution	AAEL004095	AAEL004095-RA	Other detox	aldo-keto reductase	NON_SYNONYMOUS_CODING	444	133	L>S		0.87726	0.89535	0.89828	-	-	-		6.25	144	ref		2.02703	148	ref		6.34921	189	ref		5.26316	152	ref		0	120	ref		0.769231	130	ref		21.0084	119	C/T		20.9302	215
supercont1.107:2115067	C	T	Substitution	AAEL004095	AAEL004095-RA	Other detox	aldo-keto reductase	SYNONYMOUS_CODING	481	145	D>D		0.86759	0.89343	0.89442	-	-	-		7.92683	164	ref		3.82166	157	ref		3.88889	180	ref		4.21687	166	ref		0	149	ref		0	146	ref		19.685	127	C/T		21.25	240
supercont1.107:2115148	C	T	Substitution	AAEL004095	AAEL004095-RA	Other detox	aldo-keto reductase	SYNONYMOUS_CODING	562	172	S>S		0.89599	0.90085	0.89329	-	-	-		13.8365	159	ref		3.84615	208	ref		3.66972	218	ref		3.41463	205	ref		8.0292	137	ref		16.3934	183	C/T		30.6011	183	C/T		28.4173	278
supercont1.107:2115157	T	G	Substitution	AAEL004095	AAEL004095-RA	Other detox	aldo-keto reductase	SYNONYMOUS_CODING	571	175	L>L		0.89533	0.90251	0.8912	-	-	-		82.0225	178	G		96.7442	215	G		96.4646	198	G		0.465116	215	ref		27.7027	148	G/T		22.5806	186	G/T		34.7826	184	G/T		32.069	290
supercont1.107:2115163	G	T	Substitution	AAEL004095	AAEL004095-RA	Other detox	aldo-keto reductase	SYNONYMOUS_CODING	577	177	R>R		0.81986	0.89196	0.89315	-	-	-		0	170	ref		0	209	ref		0	190	ref		0	205	ref		8.69565	138	ref		14.2077	183	G/T		7.10383	183	ref		7.53425	292
supercont1.107:2115174	A	G	Substitution	AAEL004095	AAEL004095-RA	Other detox	aldo-keto reductase	NON_SYNONYMOUS_CODING	588	181	N>S		0.85087	0.88059	0.89042	-	-	-		0	158	ref		0	187	ref		0	165	ref		0	196	ref		0	133	ref		0	183	ref		0	168	ref		0	284
supercont1.107:2115213	G	A	Substitution	AAEL004095	AAEL004095-RA	Other detox	aldo-keto reductase	NON_SYNONYMOUS_CODING	627	194	S>N		0.86959	0.90421	0.88698	StGe	-	-		89.6552	87	A		100	86	A		100	61	A		1.75439	171	ref		24.7706	109	ref		35.2941	136	A/G		62.2951	122	A/G		44.0594	202
supercont1.107:2115258	G	A	Substitution	AAEL004095	AAEL004095-RA	Other detox	aldo-keto reductase	NON_SYNONYMOUS_CODING	672	209	R>K		0.76822	0.77728	0.90218	-	-	-		0	65	ref		0	56	ref		0	50	ref		0.621118	161	ref		5.6	125	ref		5	100	ref		3.36134	119	ref		1.71429	175
supercont1.107:2115274	G	T	Substitution	AAEL004095	AAEL004095-RA	Other detox	aldo-keto reductase	SYNONYMOUS_CODING	688	214	T>T		0.79385	0.88338	0.89957	-	-	-		63.3663	101	G/T		94.9495	99	T		93.3333	90	T		0	174	ref		2.30769	130	ref		1.62602	123	ref		1.92308	156	ref		1.03093	194
supercont1.107:2115325	C	T	Substitution	AAEL004095	AAEL004095-RA	Other detox	aldo-keto reductase	SYNONYMOUS_CODING	739	231	D>D		0.89714	0.89994	0.8557	-	-	-		16.3121	141	ref		0.568182	176	ref		0	163	ref		0	146	ref		1.63934	122	ref		0.694445	144	ref		19.6532	173	C/T		12.4378	201
supercont1.107:2115343	C	A	Substitution	AAEL004095	AAEL004095-RA	Other detox	aldo-keto reductase	SYNONYMOUS_CODING	757	237	L>L		0.88142	0.89498	0.88257	-	-	-		13.924	158	ref		0	169	ref		0	155	ref		0	168	ref		3.44828	145	ref		0	139	ref		14.9701	167	A/C		13.9175	194
supercont1.107:2115375	A	T	Substitution	AAEL004095	AAEL004095-RA	Other detox	aldo-keto reductase	NON_SYNONYMOUS_CODING	789	248	K>M		0.78292	0.89182	0.89301	-	-	-		0	138	ref		0	159	ref		0	141	ref		0	147	ref		8.33333	120	ref		8.77193	114	A/T		8.64198	162	A/T		11.5607	173
supercont1.107:2115379	C	T	Substitution	AAEL004095	AAEL004095-RA	Other detox	aldo-keto reductase	SYNONYMOUS_CODING	793	249	F>F		0.86455	0.90271	0.054013	Phet	-	-		7.75194	129	ref		3.87097	155	ref		8.27068	133	ref		11.3475	141	ref		4.03226	124	ref		8.25688	109	ref		23.8994	159	C/T		25.4335	173
supercont1.107:2115389	T	C	Substitution	AAEL004095	AAEL004095-RA	Other detox	aldo-keto reductase	NON_SYNONYMOUS_CODING	803	253	S>P		0.89175	0.8941	0.87836	-	-	-		68.5484	124	C/T		95.3333	150	C		92.6829	123	C/T		0	140	ref		15.0794	126	ref		12.3894	113	C/T		2.43902	164	ref		1.82927	164
supercont1.107:2115404	T	C	Substitution	AAEL004095	AAEL004095-RA	Other detox	aldo-keto reductase	SYNONYMOUS_CODING	818	258	L>L		0.81986	0.89906	0.90344	-	-	-		70.7692	130	C/T		96.5035	143	C		91.8699	123	C/T		0	139	ref		11.0294	136	ref		1.96078	102	ref		2.39521	167	ref		1.18343	169
supercont1.107:2115406	G	A	Substitution	AAEL004095	AAEL004095-RA	Other detox	aldo-keto reductase	SYNONYMOUS_CODING	820	258	L>L		0.83034	0.89156	0.89364	-	-	-		0	134	ref		0	139	ref		0	122	ref		0	137	ref		7.40741	135	ref		5.10204	98	ref		8.38323	167	ref		9.69697	165
supercont1.107:2115409	A	G	Substitution	AAEL004095	AAEL004095-RA	Other detox	aldo-keto reductase	SYNONYMOUS_CODING	823	259	R>R		0.88863	0.90535	0.84145	-	-	-		69.2913	127	A/G		95.4887	133	G		92.3729	118	A/G		0	132	ref		15.748	127	ref		12.5	96	A/G		2.61438	153	diff		1.80723	166
supercont1.107:2115409	A	T	Substitution	AAEL004095	AAEL004095-RA	Other detox	aldo-keto reductase	SYNONYMOUS_CODING	823	259	R>R		0.88863	0.90535	0.84145	-	-	-		0	127	diff		0.75188	133	diff		0	118	diff		0	132	ref		9.44882	127	ref		4.16667	96	diff		9.15033	153	A/T		9.03614	166
supercont1.107:2115416	T	G	Substitution	AAEL004095	AAEL004095-RA	Other detox	aldo-keto reductase	NON_SYNONYMOUS_CODING	830	262	L>V		0.84415	0.89264	0.3342	-	-	-		7.93651	126	ref		4.31655	139	ref		6.83761	117	ref		7.40741	135	ref		12	125	ref		14.1414	99	G/T		28.4768	151	G/T		30.4094	171
supercont1.107:2115494	G	A	Substitution	AAEL004095	AAEL004095-RA	Other detox	aldo-keto reductase	NON_SYNONYMOUS_CODING	908	288	E>K		0.81146	0.88262	0.90453	-	-	-		0	140	ref		0	167	ref		1.85185	108	ref		0.847458	118	ref		6.92308	130	ref		13.1579	114	A/G		0.769231	130	ref		0	165
supercont1.107:2115514	G	A	Substitution	AAEL004095	AAEL004095-RA	Other detox	aldo-keto reductase	NON_SYNONYMOUS_CODING	928	294	M>I		0.74973	0.89293	0.90544	-	-	-		0	137	ref		0	179	ref		0	117	ref		0.847458	118	ref		8.39695	131	ref		15.0442	113	A/G		0	130	ref		0.591716	169
supercont1.107:2115516	C	A	Substitution	AAEL004095	AAEL004095-RA	Other detox	aldo-keto reductase	NON_SYNONYMOUS_CODING	930	295	A>E		0.85813	0.9036	0.88958	-	-	-		0	132	ref		0	176	ref		0	116	ref		0	117	ref		4	125	ref		0	111	ref		19.3798	129	A/C		21.6374	171
supercont1.107:2115536	A	G	Substitution	AAEL004095	AAEL004095-RA	Other detox	aldo-keto reductase	NON_SYNONYMOUS_CODING	950	302	T>A		0.85953	0.89168	0.90286	-	-	-		6.25	144	ref		6.38298	188	ref		3.90625	128	ref		6.61157	121	ref		13.9706	136	ref		10.0917	109	A/G		31.7073	123	A/G		40.5714	175
supercont1.107:2115568	A	G	Substitution	AAEL004095	AAEL004095-RA	Other detox	aldo-keto reductase	SYNONYMOUS_CODING	982	312	L>L		0.76078	0.89661	0.90094	-	-	-		6.56934	137	ref		5.42169	166	ref		4.23729	118	ref		4.46429	112	ref		0	149	ref		0	110	ref		15.9292	113	A/G		15.2047	171
supercont1.107:2115595	T	C	Substitution	AAEL004095	AAEL004095-RA	Other detox	aldo-keto reductase	SYNONYMOUS_CODING	1009	321	N>N		0.88214	0.8955	0.89315	-	-	-		0	134	ref		0	156	ref		0	100	ref		0	101	ref		10.0719	139	ref		6.66667	105	ref		1.94175	103	ref		9.03614	166
supercont1.107:2115608	A	T	Substitution	AAEL004095	AAEL004095-RA	Other detox	aldo-keto reductase	3PRIME_UTR	1022				0.83979	0.89685	0.90177	-	-	-		100	129	T		100	148	T		100	94	T		100	94	T		83.9416	137	T		77.9817	109	A/T		83.1776	107	A/T		95.4545	154
supercont1.107:2115652	G	A	Substitution	AAEL004095	AAEL004095-RA	Other detox	aldo-keto reductase	3PRIME_UTR	1066				0.37806	0.84871	0.89815	-	-	-		71.2	125	A/G		98.7342	158	A		98.1818	110	A		0.884956	113	ref		7.62712	118	ref		7.44681	94	ref		3.6036	111	ref		5	140
supercont1.107:2115656	A	C	Substitution	AAEL004095	AAEL004095-RA	Other detox	aldo-keto reductase	3PRIME_UTR	1070				0.8789	0.89473	0.88698	-	-	-		0.847458	118	ref		1.28205	156	ref		1.90476	105	ref		5.45455	110	ref		0	126	ref		0	96	ref		9.82143	112	A/C		6.66667	135
supercont1.107:2115664	C	T	Substitution	AAEL004095	AAEL004095-RA	Other detox	aldo-keto reductase	3PRIME_UTR	1078				0.87274	0.88968	0.89467	-	-	-		0	105	ref		0	161	ref		0	107	ref		0	114	ref		4.46429	112	ref		5.20833	96	ref		8.84956	113	C/T		10.3175	126
supercont1.107:2115670	C	T	Substitution	AAEL004095	AAEL004095-RA	Other detox	aldo-keto reductase	3PRIME_UTR	1084				0.87838	0.8985	0.89288	-	-	-		0	97	ref		0	155	ref		0	105	ref		0	111	ref		4.20168	119	ref		3.15789	95	ref		17.8571	112	C/T		20	125
supercont1.107:2115674	T	A	Substitution	AAEL004095	AAEL004095-RA	Other detox	aldo-keto reductase	3PRIME_UTR	1088				0.84415	0.89031	0.88958	-	-	-		0	84	ref		0	149	ref		0	106	ref		0	105	ref		4.6729	107	ref		6.45161	93	ref		10.5263	114	A/T		12.1951	123
supercont1.107:2115724	T	C	Substitution	AAEL004095	AAEL004095-RA	Other detox	aldo-keto reductase	3PRIME_UTR	1138				0.87936	0.88758	0.89765	-	-	-		77.551	98	C		94.3925	107	C		91.954	87	C/T		0	87	ref		9.1954	87	ref		7.79221	77	ref		0.961538	104	ref		3.27869	122
supercont1.107:2115741	C	T	Substitution	AAEL004095	AAEL004095-RA	Other detox	aldo-keto reductase	3PRIME_UTR	1155				0.83512	0.89435	0.88981	-	-	-		10.2273	88	ref		5.74713	87	ref		7.22891	83	ref		5.33333	75	ref		0	71	ref		0	83	ref		19.7917	96	C/T		18.5841	113
supercont1.107:2115770	A	AT	Insertion	AAEL004095	AAEL004095-RA	Other detox	aldo-keto reductase	3PRIME_UTR	1184				na	na	na	-	na	-		6.89655	58	ref		5.6338	71	ref		7.04225	71	ref		6.89655	58	ref		0	48	ref		0	76	ref		24.2857	70	A/AT		24.1758	91
supercont1.107:2115772	T	G	Substitution	AAEL004095	AAEL004095-RA	Other detox	aldo-keto reductase	3PRIME_UTR	1186				0.84588	0.89435	0.88933	-	-	-		0	63	ref		0	72	ref		0	70	ref		0	63	ref		3.63636	55	ref		9.33333	75	ref		11.1111	72	G/T		12.2222	90
supercont1.107:2115798	T	G	Substitution	AAEL004095	AAEL004095-RA	Other detox	aldo-keto reductase	3PRIME_UTR	1212				0.74973	0.89621	0.89453	StGe	-	-		18.1818	44	ref		0	59	ref		0	57	ref		91.6667	48	G		60	40	G/T		48.1481	54	G/T		41.8182	55	G/T		56.7568	74
supercont1.107:2115805	A	T	Substitution	AAEL004095	AAEL004095-RA	Other detox	aldo-keto reductase	3PRIME_UTR	1219				0.88545	0.88861	0.85291	-	-	-		2.27273	44	ref		0	56	ref		0	56	ref		0	50	ref		13.8889	36	ref		14.8936	47	A/T		0	57	ref		0	65
supercont1.107:2116068	G	A	Substitution	AAEL004118	AAEL004118-RA	Other detox	aldo-keto reductase	5PRIME_UTR	23				0.8789	0.89762	0.89828	-	-	-		100	110	A		100	121	A		100	101	A		100	111	A		80	95	A		68.5714	105	A/G		88.8889	108	A/G		98.0263	152
supercont1.107:2116094	G	T	Substitution	AAEL004118	AAEL004118-RA	Other detox	aldo-keto reductase	5PRIME_UTR	49				0.84588	0.89343	0.90446	-	-	-		0	113	ref		0	105	ref		0	112	ref		0	117	ref		7.44681	94	ref		10.0917	109	G/T		0	106	ref		2.01342	149
supercont1.107:2116095	T	C	Substitution	AAEL004118	AAEL004118-RA	Other detox	aldo-keto reductase	5PRIME_UTR	50				0.89338	0.89145	0.89351	-	-	-		15.3846	104	ref		3.7037	108	ref		5.30973	113	ref		5.55556	90	ref		0	79	ref		0	112	ref		24.7619	105	C/T		17.4497	149
supercont1.107:2116110	GA	G	Deletion	AAEL004118	AAEL004118-RA	Other detox	aldo-keto reductase	5PRIME_UTR	66				na	na	na	-	na	-		82.8572	105	G		85.8491	106	G/GA		89.3204	103	G/GA		85.7143	98	G		72.2892	83	G/GA		47	100	G/GA		55.1402	107	G/GA		65.2778	144
supercont1.107:2116116	A	T	Substitution	AAEL004118	AAEL004118-RA	Other detox	aldo-keto reductase	5PRIME_UTR	71				0.86858	0.89118	0.89329	-	-	-		0	108	ref		0	109	ref		0	96	ref		0	107	ref		11.9565	92	ref		9.47368	95	ref		8.41122	107	ref		4.79452	146
supercont1.107:2116120	G	A	Substitution	AAEL004118	AAEL004118-RA	Other detox	aldo-keto reductase	NON_SYNONYMOUS_CODING	75	2	A>T		0.88498	0.89087	0.89917	-	-	-		72.3404	94	A/G		95.4545	110	A		95.0495	101	A		0	102	ref		11.828	93	ref		3.0303	99	ref		1.88679	106	ref		2.08333	144
supercont1.107:2116125	A	T	Substitution	AAEL004118	AAEL004118-RA	Other detox	aldo-keto reductase	SYNONYMOUS_CODING	80	3	P>P		0.87936	0.89131	0.89442	-	-	-		0	97	ref		0	112	ref		0	109	ref		0	109	ref		7.52688	93	ref		12.1212	99	A/T		8.25688	109	ref		4.57516	153
supercont1.107:2116179	C	G	Substitution	AAEL004118	AAEL004118-RA	Other detox	aldo-keto reductase	SYNONYMOUS_CODING	134	21	L>L		0.83272	0.88338	0.89578	-	-	-		8.42105	95	ref		4.38596	114	ref		5.26316	76	ref		5.82524	103	ref		0	86	ref		0	83	ref		4.44444	90	ref		0.952381	105
supercont1.107:2116205	G	A	Substitution	AAEL004118	AAEL004118-RA	Other detox	aldo-keto reductase	INTRONIC					0.86559	0.89866	0.89621	-	-	-		100	58	A		100	79	A		100	56	A		100	60	A		76	50	A/G		66.6667	54	A/G		86	50	A/G		93.8776	49
supercont1.107:2116291	G	A	Substitution	AAEL004118	AAEL004118-RA	Other detox	aldo-keto reductase	NON_SYNONYMOUS_CODING	171	34	A>T		0.83979	0.88781	0.88667	-	-	-		0	81	ref		0	100	ref		0	85	ref		0	88	ref		5.88235	85	ref		6.97674	86	ref		0	71	ref		1.05263	95
supercont1.107:2116302	T	A	Substitution	AAEL004118	AAEL004118-RA	Other detox	aldo-keto reductase	SYNONYMOUS_CODING	182	37	A>A		0.83512	0.89957	0.89376	-	-	-		100	81	A		100	104	A		100	95	A		100	93	A		78.1609	87	A		77.2727	88	A/T		86.5854	82	A/T		96.3964	111
supercont1.107:2116390	G	A	Substitution	AAEL004118	AAEL004118-RA	Other detox	aldo-keto reductase	NON_SYNONYMOUS_CODING	270	67	A>T		0.89097	0.87314	0.90065	-	-	-		63.8298	94	A/G		90	100	A/G		95.4955	111	A		0	111	ref		2.85714	105	ref		5.88235	102	ref		1.72414	116	ref		2.4	125
supercont1.107:2116447	T	A	Substitution	AAEL004118	AAEL004118-RA	Other detox	aldo-keto reductase	INTRONIC					0.73565	0.90232	0.86853	StGe	-	-		9.40171	117	ref		0	131	ref		0	121	ref		89.5652	115	A		67.6191	105	A/T		56.25	112	A/T		48.2014	139	A/T		57.3529	136
supercont1.107:2116459	A	T	Substitution	AAEL004118	AAEL004118-RA	Other detox	aldo-keto reductase	INTRONIC					0.86858	0.88935	0.896	-	-	-		1.69492	118	ref		0	128	ref		0	116	ref		0	109	ref		5.05051	99	ref		5	100	ref		4.13793	145	ref		7.8125	128
supercont1.107:2116466	C	T	Substitution	AAEL004118	AAEL004118-RA	Other detox	aldo-keto reductase	INTRONIC					0.87199	0.90485	0.8816	StGe	-	-		5.35714	112	ref		0	132	ref		0	111	ref		90.7407	108	T		60.2041	98	C/T		50.4587	109	C/T		39.6226	159	C/T		48.4848	132
supercont1.107:2116479	A	G	Substitution	AAEL004118	AAEL004118-RA	Other detox	aldo-keto reductase	INTRONIC					0.85813	0.8932	0.84628	-	-	-		97.2222	108	G		100	126	G		100	111	G		98.1308	107	G		76.5957	94	A/G		64.2857	112	A/G		90.4762	147	A/G		90.6977	129
supercont1.107:2116502	C	T	Substitution	AAEL004118	AAEL004118-RA	Other detox	aldo-keto reductase	SYNONYMOUS_CODING	326	85	G>G		0.89163	0.8985	0.90394	-	-	-		17.2043	93	ref		2.04082	98	ref		6.18557	97	ref		11	100	ref		13.5922	103	ref		12.8788	132	C/T		36.0902	133	C/T		35.5556	135
supercont1.107:2116532	G	A	Substitution	AAEL004118	AAEL004118-RA	Other detox	aldo-keto reductase	SYNONYMOUS_CODING	356	95	T>T		0.85521	0.88509	0.89873	-	-	-		48.3871	62	A/G		90.9091	55	A/G		87.234	47	A/G		76.7857	56	A/G		39.1753	97	A/G		47.7064	109	A/G		33.6283	113	A/G		32.2835	127
supercont1.107:2116581	C	T	Substitution	AAEL004118	AAEL004118-RA	Other detox	aldo-keto reductase	SYNONYMOUS_CODING	405	112	L>L		0.26955	0.89661	0.84939	Lab	-	-		36.4865	74	C/T		93.3333	30	T		73.913	46	C/T		0	55	ref		8.10811	74	ref		2.43902	82	ref		9.375	96	C/T		5.83333	120
supercont1.107:2116601	C	T	Substitution	AAEL004118	AAEL004118-RA	Other detox	aldo-keto reductase	SYNONYMOUS_CODING	425	118	G>G		0.88181	0.89725	0.67055	-	-	-		3.7037	108	ref		0	77	ref		0	102	ref		77.5	80	C/T		41.1765	85	C/T		39.4231	104	C/T		28.2258	124	C/T		30.2632	152
supercont1.107:2116610	C	T	Substitution	AAEL004118	AAEL004118-RA	Other detox	aldo-keto reductase	SYNONYMOUS_CODING	434	121	F>F		0.87549	0.89278	0.90453	-	-	-		93.6508	126	T		100	96	T		100	113	T		16.6667	96	ref		26.5306	98	ref		25.4545	110	C/T		43.0657	137	C/T		44.4444	171
supercont1.107:2116643	A	G	Substitution	AAEL004118	AAEL004118-RA	Other detox	aldo-keto reductase	SYNONYMOUS_CODING	467	132	P>P		0.83512	0.85713	0.90427	-	-	-		0	156	ref		0	151	ref		0	163	ref		0	146	ref		0	139	ref		0	131	ref		0	168	ref		0	216
supercont1.107:2116667	G	A	Substitution	AAEL004118	AAEL004118-RA	Other detox	aldo-keto reductase	SYNONYMOUS_CODING	491	140	V>V		0.88654	0.86221	0.89989	-	-	-		0	157	ref		0	163	ref		0	184	ref		0	138	ref		0	149	ref		0	123	ref		0	158	ref		0	210
supercont1.107:2116785	G	A	Substitution	AAEL004118	AAEL004118-RA	Other detox	aldo-keto reductase	NON_SYNONYMOUS_CODING	609	180	V>I		0.87199	0.86707	0.89793	-	-	-		0.877193	114	ref		0	123	ref		0	126	ref		1.52672	131	ref		6.79612	103	ref		3.92157	102	ref		0.826446	121	ref		1.79641	167
supercont1.107:2116796	C	A	Substitution	AAEL004118	AAEL004118-RA	Other detox	aldo-keto reductase	SYNONYMOUS_CODING	620	183	V>V		0.86455	0.90165	0.89276	-	-	-		100	124	A		99.1936	124	A		100	115	A		100	131	A		80.198	101	A		83	100	A/C		93.4579	107	A		96.1783	157
supercont1.107:2116808	A	C	Substitution	AAEL004118	AAEL004118-RA	Other detox	aldo-keto reductase	SYNONYMOUS_CODING	632	187	V>V		0.88445	0.90189	0.88667	StGe	-	-		5.26316	133	ref		0	119	ref		0	108	ref		85.3846	130	C		65.2174	115	A/C		74.7368	95	A/C		41.5842	101	A/C		56.6474	173
supercont1.107:2116850	T	C	Substitution	AAEL004118	AAEL004118-RA	Other detox	aldo-keto reductase	SYNONYMOUS_CODING	674	201	F>F		0.86559	0.90109	0.89218	StGe	-	-		3.57143	112	ref		0	101	ref		0	109	ref		89.3443	122	C		71.1539	104	C/T		70.4082	98	C/T		47.7478	111	C/T		56.2874	167
supercont1.107:2116855	A	G	Substitution	AAEL004118	AAEL004118-RA	Other detox	aldo-keto reductase	NON_SYNONYMOUS_CODING	679	203	N>S		0.8911	0.89957	0.89301	-	-	-		8.10811	111	ref		1.96078	102	ref		3.84615	104	ref		9.40171	117	ref		2.75229	109	ref		3.0303	99	ref		43.3962	106	A/G		36.7089	158
supercont1.107:2116874	C	T	Substitution	AAEL004118	AAEL004118-RA	Other detox	aldo-keto reductase	SYNONYMOUS_CODING	698	209	L>L		0.88521	0.90097	0.86928	-	-	-		92.7083	96	T		98.8235	85	T		100	110	T		7.37705	122	ref		12.844	109	ref		9.27835	97	C/T		42.2018	109	C/T		39.1566	166
supercont1.107:2116880	T	C	Substitution	AAEL004118	AAEL004118-RA	Other detox	aldo-keto reductase	SYNONYMOUS_CODING	704	211	A>A		0.87488	0.90097	0.87478	-	-	-		94.1176	102	C		100	81	C		100	102	C		7.69231	117	ref		13.8298	94	ref		10.5263	95	C/T		39.4495	109	C/T		39.375	160
supercont1.107:2116946	G	A	Substitution	AAEL004118	AAEL004118-RA	Other detox	aldo-keto reductase	SYNONYMOUS_CODING	770	233	L>L		0.81986	0.89774	0.88305	-	-	-		0	40	ref		0	57	ref		0	39	ref		0	61	ref		2.94118	68	ref		0	60	ref		17.9104	67	A/G		11.9403	67
supercont1.107:2129516	A	T	Substitution	AAEL004102	AAEL004102-RA	Other detox	aldo-keto reductase	3PRIME_UTR	1432				0.84415	0.89824	0.87662	-	-	-		0	57	ref		0	79	ref		0	49	ref		0	48	ref		3.7037	54	ref		0	55	ref		17.6471	68	A/T		10.2564	78
supercont1.107:2129550	G	C	Substitution	AAEL004102	AAEL004102-RA	Other detox	aldo-keto reductase	3PRIME_UTR	1398				0.8885	0.8985	0.88766	-	-	-		8.13954	86	ref		0	103	ref		0	59	ref		0	67	ref		3.79747	79	ref		0	77	ref		15.4762	84	C/G		11.6071	112
supercont1.107:2129616	C	A	Substitution	AAEL004102	AAEL004102-RA	Other detox	aldo-keto reductase	3PRIME_UTR	1332				0.8492	0.89762	0.85223	-	-	-		0	84	ref		0	121	ref		0	80	ref		0	77	ref		10.5263	76	ref		15.7895	57	A/C		8.23529	85	ref		15.4639	97
supercont1.107:2129621	A	G	Substitution	AAEL004102	AAEL004102-RA	Other detox	aldo-keto reductase	3PRIME_UTR	1327				0.84415	0.87186	0.90177	Nakh	-	-		91.358	81	G		94.0171	117	G		93.8272	81	G		78.2609	69	G		70.5128	78	A/G		55.5556	54	A/G		51.8987	79	A/G		71.5909	88
supercont1.107:2129647	G	A	Substitution	AAEL004102	AAEL004102-RA	Other detox	aldo-keto reductase	3PRIME_UTR	1301				0.87726	0.89145	0.90305	-	-	-		86.9565	92	A		95.0413	121	A		95.0617	81	A		4.65116	43	ref		29.3103	58	ref		25.8065	62	A/G		12.9032	62	A/G		17.1429	70
supercont1.107:2129653	C	G	Substitution	AAEL004102	AAEL004102-RA	Other detox	aldo-keto reductase	3PRIME_UTR	1295				0.88024	0.88643	0.90351	-	-	-		91.1111	90	G		95.0413	121	G		92.8571	84	C/G		62.5	40	C/G		64.4068	59	C/G		45.9016	61	C/G		44.4444	63	C/G		47.7612	67
supercont1.107:2129657	C	A	Substitution	AAEL004102	AAEL004102-RA	Other detox	aldo-keto reductase	3PRIME_UTR	1291				0.87978	0.84098	0.89861	-	-	-		4.44444	90	ref		0	126	ref		0	87	ref		56.7568	37	A/C		34.4828	58	A/C		21.5385	65	A/C		29.4118	68	A/C		29.1667	72
supercont1.107:2129670	T	C	Substitution	AAEL004102	AAEL004102-RA	Other detox	aldo-keto reductase	3PRIME_UTR	1278				0.83272	0.90262	0.90478	-	-	-		0	102	ref		0	117	ref		0	97	ref		0	35	ref		37.3134	67	C/T		31.8841	69	C/T		21.9178	73	C/T		17.2414	87
supercont1.107:2129677	A	G	Substitution	AAEL004102	AAEL004102-RA	Other detox	aldo-keto reductase	3PRIME_UTR	1271				0.85669	0.89058	0.89154	StGe	-	-		10.7843	102	ref		0	118	ref		0	103	ref		70.5882	34	A/G		28.5714	63	ref		23.2877	73	A/G		30.2632	76	A/G		40.2299	87
supercont1.107:2129687	T	C	Substitution	AAEL004102	AAEL004102-RA	Other detox	aldo-keto reductase	3PRIME_UTR	1261				0.85087	0.88986	0.89938	StGe	-	-		12.6316	95	ref		0	125	ref		0.917431	109	ref		79.5918	49	C		41.4634	82	C/T		23.3766	77	C/T		35.7143	84	C/T		44.0367	109
supercont1.107:2129714	C	T	Substitution	AAEL004102	AAEL004102-RA	Other detox	aldo-keto reductase	SYNONYMOUS_CODING	1234	313	P>P		0.88978	0.90222	0.85155	-	-	-		5.30973	113	ref		0	146	ref		0	127	ref		57.9545	88	C/T		3.44828	116	ref		3.7037	81	ref		0	117	ref		0	178
supercont1.107:2129777	A	C	Substitution	AAEL004102	AAEL004102-RA	Other detox	aldo-keto reductase	SYNONYMOUS_CODING	1171	292	A>A		0.27151	0.86159	0.90399	-	-	-		25.4717	106	ref		0	118	ref		0	122	ref		86.3248	117	C		52.7273	110	A/C		49.0741	108	A/C		58.2677	127	A/C		59.6591	176
supercont1.107:2129825	G	A	Substitution	AAEL004102	AAEL004102-RA	Other detox	aldo-keto reductase	SYNONYMOUS_CODING	1123	276	F>F		0.59609	0.89881	0.88698	-	-	-		66.6667	123	A/G		97.1631	141	A		92.0635	126	A/G		0	118	ref		22.7273	132	ref		26.0417	96	A/G		16.0584	137	A/G		17.3469	196
supercont1.107:2129834	T	A	Substitution	AAEL004102	AAEL004102-RA	Other detox	aldo-keto reductase	SYNONYMOUS_CODING	1114	273	A>A		0.88743	0.89397	0.90539	-	-	-		91.4062	128	A		97.1831	142	A		91.129	124	A/T		91.603	131	A		80.597	134	A		70.7071	99	A/T		63.6364	132	A/T		82.4742	194
supercont1.107:2129949	T	A	Substitution	AAEL004102	AAEL004102-RA	Other detox	aldo-keto reductase	NON_SYNONYMOUS_CODING	999	235	K>I		0.8537	0.87492	0.90325	-	-	-		0.719425	139	ref		0	154	ref		0	164	ref		0.684932	146	ref		4.08163	147	ref		2.29008	131	ref		11.5108	139	A/T		12.2271	229
supercont1.107:2129962	G	A	Substitution	AAEL004102	AAEL004102-RA	Other detox	aldo-keto reductase	SYNONYMOUS_CODING	986	231	L>L		0.87549	0.89967	0.90075	StGe	-	-		7.56303	119	ref		0	156	ref		0	160	ref		88.6076	158	A		54.717	159	A/G		43.5115	131	A/G		41.4286	140	A/G		46.888	241
supercont1.107:2129990	C	G	Substitution	AAEL004102	AAEL004102-RA	Other detox	aldo-keto reductase	SYNONYMOUS_CODING	958	221	P>P		0.83512	0.83789	0.89442	-	-	-		60.1942	103	C/G		91.5888	107	C/G		90.678	118	C/G		0	154	ref		0	152	ref		0	138	ref		0	132	ref		0	239
supercont1.107:2130014	A	G	Substitution	AAEL004102	AAEL004102-RA	Other detox	aldo-keto reductase	SYNONYMOUS_CODING	934	213	S>S		0.89134	0.89356	0.89851	-	-	-		70.9302	86	A/G		93.5897	78	G		89.011	91	A/G		0	157	ref		8.60927	151	ref		9.35252	139	A/G		12.1019	157	A/G		15.4472	246
supercont1.107:2130035	T	G	Substitution	AAEL004102	AAEL004102-RA	Other detox	aldo-keto reductase	SYNONYMOUS_CODING	913	206	G>G		0.4871	0.83267	0.89535	-	-	-		48.4211	95	G/T		91.4286	70	G/T		86.9048	84	G/T		0	145	ref		0	137	ref		0	155	ref		0	164	ref		0	216
supercont1.107:2130044	C	T	Substitution	AAEL004102	AAEL004102-RA	Other detox	aldo-keto reductase	SYNONYMOUS_CODING	904	203	R>R		0.078948	0.84251	0.88825	Lab	-	-		40.5063	79	C/T		96.8254	63	T		88.3117	77	C/T		0	146	ref		0	142	ref		0	150	ref		0	158	ref		0	215
supercont1.107:2130077	G	A	Substitution	AAEL004102	AAEL004102-RA	Other detox	aldo-keto reductase	SYNONYMOUS_CODING	871	192	Y>Y		0.88707	0.88299	0.90517	-	-	-		85	120	A		92.3729	118	A/G		90.1515	132	A/G		88.0282	142	A		64.2857	140	A/G		57.2254	173	A/G		51.8519	162	A/G		54.9296	213
supercont1.107:2130098	A	G	Substitution	AAEL004102	AAEL004102-RA	Other detox	aldo-keto reductase	SYNONYMOUS_CODING	850	185	N>N		0.71829	0.88714	0.89873	-	-	-		16.0305	131	ref		0	140	ref		0	148	ref		0	127	ref		10.1449	138	ref		5.96026	151	ref		0	149	ref		0	210
supercont1.107:2130104	G	A	Substitution	AAEL004102	AAEL004102-RA	Other detox	aldo-keto reductase	SYNONYMOUS_CODING	844	183	V>V		0.83979	0.86917	0.86289	-	-	-		17.0213	141	ref		0	147	ref		0	151	ref		0	129	ref		11.5942	138	ref		5.16129	155	ref		0	152	ref		0	222
supercont1.107:2130191	A	G	Substitution	AAEL004102	AAEL004102-RA	Other detox	aldo-keto reductase	SYNONYMOUS_CODING	757	154	D>D		0.87726	0.89931	0.30624	-	-	-		5.64516	124	ref		0	154	ref		0.621118	161	ref		85.7143	112	G		64.0351	114	A/G		60	130	A/G		43.8356	146	A/G		41.1392	158
supercont1.107:2130260	A	G	Substitution	AAEL004102	AAEL004102-RA	Other detox	aldo-keto reductase	SYNONYMOUS_CODING	688	131	D>D		0.88142	0.90097	0.89502	StGe	-	-		7.89474	152	ref		0	128	ref		0	128	ref		85.0575	87	G		49.0741	108	A/G		38.3178	107	A/G		33.3333	108	A/G		40.8805	159
supercont1.107:2130263	G	A	Substitution	AAEL004102	AAEL004102-RA	Other detox	aldo-keto reductase	SYNONYMOUS_CODING	685	130	P>P		0.88726	0.8344	0.90336	-	-	-		81.1688	154	A		92.9688	128	A/G		94.4882	127	A		0	89	ref		0	106	ref		0	109	ref		0	114	ref		0	166
supercont1.107:2130281	C	T	Substitution	AAEL004102	AAEL004102-RA	Other detox	aldo-keto reductase	SYNONYMOUS_CODING	667	124	E>E		0.86759	0.87314	0.83436	-	-	-		0	128	ref		0	124	ref		0	131	ref		0	80	ref		0	99	ref		0	100	ref		0	128	ref		0	161
supercont1.107:2130299	T	C	Substitution	AAEL004102	AAEL004102-RA	Other detox	aldo-keto reductase	SYNONYMOUS_CODING	649	118	A>A		0.8869	0.89196	0.62066	-	-	-		0	118	ref		0	100	ref		0	126	ref		0	83	ref		7.29167	96	ref		8.33333	84	ref		0	138	ref		0	157
supercont1.107:2130311	G	A	Substitution	AAEL004102	AAEL004102-RA	Other detox	aldo-keto reductase	SYNONYMOUS_CODING	637	114	H>H		0.36642	0.86286	0.90497	-	-	-		20.5128	117	ref		0	93	ref		0	117	ref		83.3333	72	A		68	75	A/G		53.5714	84	A/G		56.2044	137	A/G		59.8592	142
supercont1.107:2130350	T	A	Substitution	AAEL004102	AAEL004102-RA	Other detox	aldo-keto reductase	NON_SYNONYMOUS_CODING	598	101	K>N		0.89004	0.86707	0.89502	-	-	-		62.1212	66	A/T		89.6552	58	A/T		94.8052	77	A		0	63	ref		0	61	ref		0	85	ref		1.05263	95	ref		0	108
supercont1.107:2130356	A	T	Substitution	AAEL004102	AAEL004102-RA	Other detox	aldo-keto reductase	SYNONYMOUS_CODING	592	99	T>T		0.88567	0.88299	0.89612	StGe	-	-		5.88235	68	ref		0	65	ref		0	70	ref		78.5714	56	T		35.9375	64	A/T		35.8025	81	A/T		35.6322	87	A/T		40.9524	105
supercont1.107:2130369	G	A	Substitution	AAEL004102	AAEL004102-RA	Other detox	aldo-keto reductase	NON_SYNONYMOUS_CODING	579	95	A>V		0.85087	0.84391	0.85007	-	-	-		0	63	ref		0	66	ref		0	66	ref		27.6596	47	ref		5.66038	53	ref		6.32911	79	ref		2.85714	70	ref		2.29885	87
supercont1.107:2130386	C	G	Substitution	AAEL004102	AAEL004102-RA	Other detox	aldo-keto reductase	SYNONYMOUS_CODING	562	89	P>P		0.89462	0.78023	0.89101	-	-	-		64.1509	53	C/G		86.5385	52	C/G		89.1304	46	C/G		65.625	32	C/G		17.7778	45	ref		21.7391	69	C/G		28	50	C/G		26.7606	71
supercont1.107:2130386	C	T	Substitution	AAEL004102	AAEL004102-RA	Other detox	aldo-keto reductase	SYNONYMOUS_CODING	562	89	P>P		0.89462	0.78023	0.89101	-	-	-		13.2075	53	diff		0	52	diff		0	46	diff		3.125	32	diff		8.88889	45	ref		2.89855	69	diff		16	50	diff		12.6761	71
supercont1.107:2130389	G	A	Substitution	AAEL004102	AAEL004102-RA	Other detox	aldo-keto reductase	SYNONYMOUS_CODING	559	88	R>R		0.89175	0.89397	0.89927	Cayn	-	-		64.7059	51	A/G		86.2745	51	A/G		88.6364	44	A/G		65.3846	26	lc		14.5833	48	ref		20.8955	67	A/G		25	52	A/G		26.7606	71
supercont1.107:2130407	T	C	Substitution	AAEL004102	AAEL004102-RA	Other detox	aldo-keto reductase	SYNONYMOUS_CODING	541	82	L>L		0.87978	0.88714	0.90188	Nakh	-	-		78.5714	42	C		83.3333	48	C/T		85	40	C/T		11.1111	9	lc		26.4706	34	ref		16.3265	49	C/T		11.9048	42	C/T		15.9091	44
supercont1.107:2130421	C	T	Substitution	AAEL004102	AAEL004102-RA	Other detox	aldo-keto reductase	NON_SYNONYMOUS_CODING	527	78	V>I		0.86959	0.88861	0.64279	-	-	-		0	54	ref		0	60	ref		0	50	ref		0	21	lc		11.1111	36	ref		11.9048	42	C/T		0	52	ref		0	49
supercont1.107:2130441	A	C	Substitution	AAEL004102	AAEL004102-RA	Other detox	aldo-keto reductase	SPLICE_SITE					0.82791	0.89102	0.88552	-	-	-		0	55	ref		0	75	ref		0	49	ref		0	36	ref		14.2857	56	ref		12.766	47	A/C		0	52	ref		0	53
supercont1.107:2130443	TGA	TT	Complex	AAEL004102	AAEL004102-RA	Other detox	aldo-keto reductase	INTRONIC					na	na	na	StGe	na	-		13.0435	46	ref		0	71	ref		0	45	ref		86.4865	37	TT		34.6154	52	overlap		15.5556	45	TGA/TT		26.5306	49	TGA/TT		38	50
supercont1.107:2130445	A	T	Substitution	AAEL004102	AAEL004102-RA	Other detox	aldo-keto reductase	INTRONIC					0.8842	0.90209	0.90043	StGe	-	-		12.2449	49	ref		0	71	ref		0	46	ref		86.8421	38	overlap		34.5455	55	A/T		17.3913	46	overlap		26	50	overlap		38.4615	52
supercont1.107:2130450	A	T	Substitution	AAEL004102	AAEL004102-RA	Other detox	aldo-keto reductase	INTRONIC					0.88635	0.89906	0.89578	StGe	-	-		83.3333	48	T		96	75	T		90	50	A/T		85.4167	48	T		37.0968	62	A/T		25.4902	51	A/T		31.6667	60	A/T		44.6429	56
supercont1.107:2130475	T	C	Substitution	AAEL004102	AAEL004102-RA	Other detox	aldo-keto reductase	INTRONIC					0.85238	0.84443	0.8789	-	-	-		73.6842	57	C/T		96.4706	85	C		95.6522	69	C		0	67	ref		0	85	ref		0	63	ref		0	75	ref		0	94
supercont1.107:2130501	C	G	Substitution	AAEL004102	AAEL004102-RA	Other detox	aldo-keto reductase	NON_SYNONYMOUS_CODING	500	69	G>R		0.89147	0.82547	0.90159	-	-	-		70.5882	68	C/G		90.9091	88	C/G		96.9697	66	G		0	82	ref		0	93	ref		0	77	ref		0	76	ref		0	117
supercont1.107:2130519	C	T	Substitution	AAEL004102	AAEL004102-RA	Other detox	aldo-keto reductase	NON_SYNONYMOUS_CODING	482	63	A>T		0.88567	0.88935	0.89691	-	-	-		0	77	ref		0	87	ref		0	70	ref		0	76	ref		0	96	ref		0	86	ref		0	95	ref		0	129
supercont1.107:2130589	A	G	Substitution	AAEL004102	AAEL004102-RA	Other detox	aldo-keto reductase	SYNONYMOUS_CODING	412	39	I>I		0.88142	0.89535	0.90344	-	-	-		97.9592	49	G		91.6667	60	A/G		96.0784	51	G		90.7407	54	G		58.8235	68	A/G		51.5625	64	A/G		52.1739	69	A/G		64.8352	91
supercont1.107:2130640	T	C	Substitution	AAEL004102	AAEL004102-RA	Other detox	aldo-keto reductase	INTRONIC					0.88589	0.85462	0.88766	-	-	-		2	50	ref		10.7692	65	C/T		0	50	ref		0	52	ref		0	62	ref		0	83	ref		0	61	ref		0	88
supercont1.107:2130649	A	G	Substitution	AAEL004102	AAEL004102-RA	Other detox	aldo-keto reductase	INTRONIC					0.86959	0.90353	0.85952	-	-	-		0	61	ref		0	68	ref		0	50	ref		0	54	ref		34.3284	67	A/G		34.5238	84	A/G		24.1935	62	A/G		23.6559	93
supercont1.107:2130686	A	C	Substitution	AAEL004102	AAEL004102-RA	Other detox	aldo-keto reductase	INTRONIC					0.85669	0.90408	0.89453	-	-	-		12.6582	79	ref		0	86	ref		0	84	ref		94.0298	67	C		49.2958	71	A/C		31.8681	91	A/C		58.9041	73	A/C		43.8095	105
supercont1.107:2130737	G	T	Substitution	AAEL004102	AAEL004102-RA	Other detox	aldo-keto reductase	SYNONYMOUS_CODING	334	13	G>G		0.87199	0.89278	0.89154	-	-	-		0	90	ref		0	85	ref		0	93	ref		0	81	ref		5.06329	79	ref		1.53846	65	ref		9.45946	74	ref		12.069	116
supercont1.107:2130752	C	T	Substitution	AAEL004102	AAEL004102-RA	Other detox	aldo-keto reductase	SYNONYMOUS_CODING	319	8	A>A		0.87838	0.88918	0.89743	-	-	-		9.27835	97	ref		0	105	ref		0	108	ref		86.8132	91	T		55.2083	96	C/T		51.8519	81	C/T		52.3256	86	C/T		46.5649	131
supercont1.107:2130765	A	T	Substitution	AAEL004102	AAEL004102-RA	Other detox	aldo-keto reductase	NON_SYNONYMOUS_CODING	306	4	I>K		0.81146	0.89196	0.90497	-	-	-		92.5532	94	T		94.9495	99	T		97.9167	96	T		89.8734	79	T		78.8889	90	T		70	80	A/T		58.5366	82	A/T		64.4628	121
supercont1.107:2130793	C	T	Substitution	AAEL004102	AAEL004102-RA	Other detox	aldo-keto reductase	5PRIME_UTR	278				0.8869	0.86633	0.88981	-	-	-		2.08333	48	ref		0	70	ref		0	73	ref		1.1236	89	ref		0	93	ref		0	98	ref		0	106	ref		0.719425	139
supercont1.107:2130796	T	A	Substitution	AAEL004102	AAEL004102-RA	Other detox	aldo-keto reductase	5PRIME_UTR	275				0.81735	0.87969	0.89276	-	-	-		50	42	A/T		91.1765	68	A/T		94.0298	67	A		0	93	ref		6.89655	87	ref		9	100	ref		0	109	ref		0	134
supercont1.107:2130833	A	C	Substitution	AAEL004102	AAEL004102-RA	Other detox	aldo-keto reductase	5PRIME_UTR	238				0.88654	0.89307	0.90218	-	-	-		87.3016	63	C		81.4815	54	A/C		85.7143	42	A/C		95.4128	109	C		74.359	78	A/C		50.9434	106	A/C		63.3333	120	A/C		55.7047	149
supercont1.107:2130900	G	C	Substitution	AAEL004102	AAEL004102-RA	Other detox	aldo-keto reductase	5PRIME_UTR	171				0.87488	0.86352	0.89927	-	-	-		0	89	ref		0	126	ref		0	89	ref		0	118	ref		0	143	ref		0	116	ref		0	117	ref		0	178
supercont1.107:2130918	T	A	Substitution	AAEL004102	AAEL004102-RA	Other detox	aldo-keto reductase	5PRIME_UTR	153				0.83272	0.89813	0.87276	-	-	-		17.8082	73	ref		0	98	ref		0	77	ref		70.5882	119	A/T		43.8849	139	A/T		32.2581	124	A/T		25.4098	122	A/T		18.6813	182
supercont1.107:2162671	G	A	Substitution	AAEL004096	AAEL004096-RA	Other detox	aldo-keto reductase	5PRIME_UTR	44				0.80817	0.89621	0.72856	-	-	-		70.9091	110	A/G		96.9388	98	A		93.0233	86	A		0	96	ref		17.8571	84	ref		3.07692	65	ref		2.29885	87	ref		6.48148	108
supercont1.107:2162693	G	A	Substitution	AAEL004096	AAEL004096-RA	Other detox	aldo-keto reductase	5PRIME_UTR	66				0.88567	0.84871	0.83798	-	-	-		7.56303	119	ref		2.24719	89	ref		5.88235	85	ref		7.86517	89	ref		12.1951	82	ref		14.9254	67	A/G		25.6757	74	A/G		30.4762	105
supercont1.107:2162698	C	T	Substitution	AAEL004096	AAEL004096-RA	Other detox	aldo-keto reductase	5PRIME_UTR	71				0.8256	0.89487	0.86124	-	-	-		3.53982	113	ref		0	86	ref		0	84	ref		91.0112	89	T		58.1395	86	C/T		55.7143	70	C/T		74.3243	74	C/T		60.1852	108
supercont1.107:2162704	T	A	Substitution	AAEL004096	AAEL004096-RA	Other detox	aldo-keto reductase	5PRIME_UTR	77				0.86083	0.8407	0.89989	-	-	-		0	105	ref		0	80	ref		0	74	ref		4.93827	81	ref		21.5909	88	ref		14.9254	67	A/T		12.8571	70	A/T		17.6471	102
supercont1.107:2162710	T	A	Substitution	AAEL004096	AAEL004096-RA	Other detox	aldo-keto reductase	5PRIME_UTR	83				0.87041	0.89498	0.90043	-	-	-		0	92	ref		0	76	ref		0	68	ref		0	74	ref		10.2564	78	ref		6.15385	65	ref		2.98507	67	ref		8.16327	98
supercont1.107:2162712	A	C	Substitution	AAEL004096	AAEL004096-RA	Other detox	aldo-keto reductase	5PRIME_UTR	85				0.89684	0.89251	0.80361	-	-	-		76.7442	86	A/C		95.8904	73	C		96.9697	66	C		90.9091	66	C		57.5758	66	A/C		50.7692	65	A/C		70.3125	64	A/C		54.2553	94
supercont1.107:2162744	C	T	Substitution	AAEL004096	AAEL004096-RA	Other detox	aldo-keto reductase	NON_SYNONYMOUS_CODING	117	6	P>S		0.87783	0.89473	0.90105	-	-	-		10.5263	76	ref		7.57576	66	ref		9.375	64	ref		1.42857	70	ref		2.5974	77	ref		9.23077	65	ref		17.9104	67	C/T		18.4783	92
supercont1.107:2162746	A	G	Substitution	AAEL004096	AAEL004096-RA	Other detox	aldo-keto reductase	SYNONYMOUS_CODING	119	6	P>P		0.86858	0.89058	0.87209	-	-	-		100	76	G		100	65	G		100	62	G		100	65	G		88.75	80	G		76.5625	64	A/G		100	68	G		100	90
supercont1.107:2162748	A	G	Substitution	AAEL004096	AAEL004096-RA	Other detox	aldo-keto reductase	NON_SYNONYMOUS_CODING	121	7	N>S		0.87726	0.88226	0.61943	-	-	-		71.0526	76	A/G		92.3077	65	A/G		90.4762	63	A/G		0	67	ref		7.14286	84	ref		6.55738	61	ref		0	69	ref		3.2967	91
supercont1.107:2162768	T	G	Substitution	AAEL004096	AAEL004096-RA	Other detox	aldo-keto reductase	NON_SYNONYMOUS_CODING	141	14	Y>D		0.85087	0.89813	0.89679	Cayn	-	-		7.57576	66	ref		0	72	ref		0	56	ref		73.7705	61	G/T		20.6897	87	ref		28.7671	73	G/T		35.8974	78	G/T		29.8969	97
supercont1.107:2162770	C	T	Substitution	AAEL004096	AAEL004096-RA	Other detox	aldo-keto reductase	SYNONYMOUS_CODING	143	14	Y>Y		0.89163	0.8279	0.89234	-	-	-		82.1918	73	T		94.4444	72	T		89.2857	56	C/T		73.8461	65	C/T		45.1613	93	C/T		36.1111	72	C/T		48.1481	81	overlap		43.4343	99
supercont1.107:2162822	T	A	Substitution	AAEL004096	AAEL004096-RA	Other detox	aldo-keto reductase	INTRONIC					0.89243	0.83306	0.83871	-	-	-		88.8889	99	A		97.4576	118	A		92.9578	71	A/T		78.7611	113	A		60.2041	98	A/T		39.1304	92	A/T		51.9231	104	A/T		46.3235	136
supercont1.107:2162847	G	C	Substitution	AAEL004096	AAEL004096-RA	Other detox	aldo-keto reductase	INTRONIC					0.44344	0.9005	0.9002	-	-	-		57.8947	114	C/G		95.7627	118	C		94.0476	84	C		0	115	ref		23.8095	105	ref		10.1124	89	overlap		13.913	115	overlap		11.3333	150
supercont1.107:2162848	A	T	Substitution	AAEL004096	AAEL004096-RA	Other detox	aldo-keto reductase	INTRONIC					0.61846	0.89435	0.89999	-	-	-		13.6752	117	ref		0	119	ref		0	83	ref		81.9672	122	T		39	100	A/T		31.8681	91	overlap		41.2281	114	overlap		34.2105	152
supercont1.107:2162851	G	A	Substitution	AAEL004096	AAEL004096-RA	Other detox	aldo-keto reductase	INTRONIC					0.89514	0.88758	0.8934	-	-	-		23.6842	114	ref		4.13223	121	ref		5.88235	85	ref		81.746	126	A		43.8776	98	A/G		34.8315	89	A/G		55.1724	116	A/G		51.2987	154
supercont1.107:2162858	C	A	Substitution	AAEL004096	AAEL004096-RA	Other detox	aldo-keto reductase	INTRONIC					0.86207	0.87055	0.90094	-	-	-		0	126	ref		0	131	ref		0	93	ref		0	127	ref		0	109	ref		0	103	ref		0	116	ref		0	159
supercont1.107:2162868	T	C	Substitution	AAEL004096	AAEL004096-RA	Other detox	aldo-keto reductase	INTRONIC					0.82275	0.80029	0.89138	-	-	-		0	127	ref		0	133	ref		0	108	ref		12.2302	139	ref		30.8333	120	C/T		30.2752	109	C/T		29.3651	126	C/T		35.7576	165
supercont1.107:2162895	A	G	Substitution	AAEL004096	AAEL004096-RA	Other detox	aldo-keto reductase	SYNONYMOUS_CODING	194	31	G>G		0.88834	0.85655	0.89453	-	-	-		9.74026	154	ref		2.01342	149	ref		3.57143	140	ref		0.689655	145	ref		4.86111	144	ref		5.67376	141	ref		10.4839	124	A/G		18.4615	195
supercont1.107:2162913	G	A	Substitution	AAEL004096	AAEL004096-RA	Other detox	aldo-keto reductase	SYNONYMOUS_CODING	212	37	K>K		0.89524	0.85836	0.89703	-	-	-		10.6509	169	ref		1.2987	154	ref		3.67647	136	ref		1.31579	152	ref		2.7027	148	ref		6	150	ref		10.3175	126	A/G		16.5803	193
supercont1.107:2162976	C	T	Substitution	AAEL004096	AAEL004096-RA	Other detox	aldo-keto reductase	SYNONYMOUS_CODING	275	58	V>V		0.88589	0.85836	0.88698	-	-	-		91.129	124	T		96.4029	139	T		95.7895	95	T		98.3471	121	T		85.2941	102	T		78.2609	115	C/T		84.375	96	C/T		85.8108	148
supercont1.107:2163030	C	A	Substitution	AAEL004096	AAEL004096-RA	Other detox	aldo-keto reductase	SYNONYMOUS_CODING	329	76	V>V		0.89703	0.84772	0.78849	-	-	-		66.1972	71	A/C		91.0448	67	A/C		91.0714	56	A/C		98.8235	85	A		85.7143	91	A		76.699	103	A/C		87.7778	90	A/C		82.8125	128
supercont1.107:2163091	T	C	Substitution	AAEL004096	AAEL004096-RA	Other detox	aldo-keto reductase	INTRONIC					0.88394	0.88879	0.87209	-	-	-		100	38	C		96.9697	33	C		100	41	C		100	28	lc		84.0909	44	C		89.2857	56	C/T		100	47	C		100	69
supercont1.107:2163098	T	C	Substitution	AAEL004096	AAEL004096-RA	Other detox	aldo-keto reductase	SPLICE_SITE					0.83763	0.83606	0.79413	-	-	-		0	47	ref		0	49	ref		0	49	ref		16.2162	37	ref		2.12766	47	ref		10.1695	59	ref		10.6383	47	ref		10.9589	73
supercont1.107:2163122	G	C	Substitution	AAEL004096	AAEL004096-RA	Other detox	aldo-keto reductase	NON_SYNONYMOUS_CODING	366	89	A>P		0.87488	0.85836	0.87779	-	-	-		87.5	64	C		91.8605	86	C/G		94.5946	74	C		49.0196	51	C/G		28.3333	60	ref		29.0323	62	C/G		16.6667	60	C/G		16.6667	84
supercont1.107:2163136	C	T	Substitution	AAEL004096	AAEL004096-RA	Other detox	aldo-keto reductase	SYNONYMOUS_CODING	380	93	A>A		0.8735	0.89931	0.90421	-	-	-		8.43374	83	ref		6	100	ref		5.10204	98	ref		0	62	ref		5.47945	73	ref		12.1622	74	C/T		20.8955	67	C/T		17.094	117
supercont1.107:2163164	A	C	Substitution	AAEL004096	AAEL004096-RA	Other detox	aldo-keto reductase	NON_SYNONYMOUS_CODING	408	103	I>L		0.86083	0.89264	0.85642	-	-	-		100	104	C		100	129	C		100	109	C		100	83	C		87.8378	74	C		87.5	88	A/C		100	81	C		100	131
supercont1.107:2163187	A	G	Substitution	AAEL004096	AAEL004096-RA	Other detox	aldo-keto reductase	SYNONYMOUS_CODING	431	110	L>L		0.89744	0.89343	0.90492	-	-	-		74.0458	131	A/G		94.2623	122	G		93.7985	129	G		98.9247	93	G		74.1573	89	A/G		85.4167	96	A/G		81.1881	101	A/G		80.8917	157
supercont1.107:2163189	A	T	Substitution	AAEL004096	AAEL004096-RA	Other detox	aldo-keto reductase	NON_SYNONYMOUS_CODING	433	111	Y>F		0.88142	0.89511	0.89398	-	-	-		6.87023	131	ref		0	125	ref		0	131	ref		74.1936	93	A/T		26.2626	99	ref		25.7732	97	A/T		36.6337	101	A/T		32.5153	163
supercont1.107:2163214	G	C	Substitution	AAEL004096	AAEL004096-RA	Other detox	aldo-keto reductase	SYNONYMOUS_CODING	458	119	L>L		0.79693	0.89535	0.89567	-	-	-		0	140	ref		0	152	ref		0	140	ref		0	106	ref		9.00901	111	ref		2.7027	111	ref		8.94309	123	ref		9.34066	182
supercont1.107:2163223	G	A	Substitution	AAEL004096	AAEL004096-RA	Other detox	aldo-keto reductase	SYNONYMOUS_CODING	467	122	Q>Q		0.89462	0.88509	0.90032	-	-	-		70.8955	134	A/G		95.9459	148	A		94.8905	137	A		99.0385	104	A		83.1933	119	A		82.2034	118	A/G		79.8387	124	A/G		80.8511	188
supercont1.107:2163259	C	T	Substitution	AAEL004096	AAEL004096-RA	Other detox	aldo-keto reductase	SYNONYMOUS_CODING	503	134	S>S		0.8869	0.89182	0.89989	-	-	-		12.2137	131	ref		4.41176	136	ref		4.65116	129	ref		1.14943	87	ref		2.24719	89	ref		9.52381	105	C/T		14.1593	113	C/T		18.7879	165
supercont1.107:2163268	C	G	Substitution	AAEL004096	AAEL004096-RA	Other detox	aldo-keto reductase	NON_SYNONYMOUS_CODING	512	137	N>K		0.87199	0.89685	0.90351	-	-	-		10.1562	128	ref		5	140	ref		4.03226	124	ref		1.40845	71	ref		2.5	80	ref		12.3711	97	C/G		15.8879	107	C/G		21.7105	152
supercont1.107:2163292	C	T	Substitution	AAEL004096	AAEL004096-RA	Other detox	aldo-keto reductase	SYNONYMOUS_CODING	536	145	Y>Y		0.78292	0.88475	0.88056	-	-	-		0.819672	122	ref		0	126	ref		0	130	ref		60	35	C/T		21.1538	52	ref		16.6667	66	C/T		15.625	64	C/T		9.67742	93
supercont1.107:2163298	C	A	Substitution	AAEL004096	AAEL004096-RA	Other detox	aldo-keto reductase	NON_SYNONYMOUS_CODING	542	147	D>E		0.88394	0.89196	0.83698	Phet	-	-		91.3793	116	A		92.9688	128	A/C		97.1429	140	A		94.7369	19	lc		65	40	A/C		63.1579	57	A/C		66.6667	57	A/C		60.7143	84
supercont1.107:2163301	T	A	Substitution	AAEL004096	AAEL004096-RA	Other detox	aldo-keto reductase	SYNONYMOUS_CODING	545	148	T>T		0.89359	0.84671	0.60867	Phet	-	-		73.3333	120	A/T		93.2331	133	A		97.2414	145	A		86.6667	15	lc		64.8649	37	A/T		60.3774	53	A/T		67.2727	55	A/T		58.75	80
supercont1.107:2163403	A	G	Substitution	AAEL004096	AAEL004096-RA	Other detox	aldo-keto reductase	SYNONYMOUS_CODING	647	182	E>E		0.84769	0.66363	0.89979	-	-	-		0	141	ref		0	136	ref		0	128	ref		8.43374	83	ref		13.5135	74	ref		9.375	64	ref		14.0845	71	A/G		12.5828	151
supercont1.107:2163406	C	T	Substitution	AAEL004096	AAEL004096-RA	Other detox	aldo-keto reductase	SYNONYMOUS_CODING	650	183	I>I		0.88024	0.62836	0.89803	-	-	-		0	141	ref		0.719425	139	ref		0	123	ref		9.63855	83	ref		13.75	80	ref		9.23077	65	ref		13.5135	74	C/T		14.2857	154
supercont1.107:2163436	T	C	Substitution	AAEL004096	AAEL004096-RA	Other detox	aldo-keto reductase	SYNONYMOUS_CODING	680	193	N>N		0.74973	0.69286	0.89775	-	-	-		0	149	ref		0	154	ref		0	140	ref		15.8416	101	ref		23.8532	109	ref		15	80	C/T		19.0476	105	C/T		18.9474	190
supercont1.107:2163460	G	A	Substitution	AAEL004096	AAEL004096-RA	Other detox	aldo-keto reductase	SYNONYMOUS_CODING	704	201	L>L		0.84769	0.89919	0.90056	-	-	-		9.58084	167	ref		5.08475	177	ref		3.33333	150	ref		1.81818	110	ref		0.740741	135	ref		2.0202	99	ref		16.9492	118	A/G		17.9372	223
supercont1.107:2163489	C	T	Substitution	AAEL004096	AAEL004096-RA	Other detox	aldo-keto reductase	NON_SYNONYMOUS_CODING	733	211	T>M		0.84415	0.62927	0.90257	-	-	-		0	126	ref		0	172	ref		0	181	ref		19.802	101	ref		22.2222	135	ref		21.2963	108	C/T		25.5639	133	C/T		22.0884	249
supercont1.107:2163562	A	G	Substitution	AAEL004096	AAEL004096-RA	Other detox	aldo-keto reductase	SYNONYMOUS_CODING	806	235	P>P		0.85521	0.87675	0.89513	-	-	-		5.35714	112	ref		0	138	ref		0	132	ref		78.75	80	G		37.2727	110	A/G		32.6733	101	A/G		43.9252	107	A/G		34.555	191
supercont1.107:2163611	A	G	Substitution	AAEL004096	AAEL004096-RA	Other detox	aldo-keto reductase	NON_SYNONYMOUS_CODING	855	252	I>V		0.83272	0.85836	0.90295	-	-	-		11.9266	109	ref		0	116	ref		0	109	ref		73.4043	94	A/G		36.2832	113	A/G		38.4615	117	A/G		44.9153	118	A/G		36	175
supercont1.107:2163631	G	A	Substitution	AAEL004096	AAEL004096-RA	Other detox	aldo-keto reductase	SPLICE_SITE					0.77897	0.89967	0.89589	-	-	-		0	104	ref		0	104	ref		0	104	ref		0	94	ref		14.2857	105	ref		5.15464	97	ref		13.2231	121	A/G		12.2093	172
supercont1.107:2163633	C	T	Substitution	AAEL004096	AAEL004096-RA	Other detox	aldo-keto reductase	SPLICE_SITE					0.85953	0.87186	0.6648	-	-	-		65.0485	103	C/T		94.0594	101	T		93.2692	104	T		0	88	ref		9.82143	112	ref		5.31915	94	ref		0	119	ref		1.84049	163
supercont1.107:2163673	T	G	Substitution	AAEL004096	AAEL004096-RA	Other detox	aldo-keto reductase	INTRONIC					0.52554	0.88262	0.82789	-	-	-		89.4231	104	G		100	89	G		100	89	G		2.12766	94	ref		12.3457	81	ref		10.8434	83	G/T		18.9189	111	G/T		21.6418	134
supercont1.107:2163676	T	G	Substitution	AAEL004096	AAEL004096-RA	Other detox	aldo-keto reductase	INTRONIC					0.85669	0.89564	0.89479	-	-	-		0	113	ref		0	85	ref		0	88	ref		0	93	ref		13.7931	87	ref		6.25	80	ref		12.5	112	G/T		9.23077	130
supercont1.107:2163728	G	A	Substitution	AAEL004096	AAEL004096-RA	Other detox	aldo-keto reductase	SYNONYMOUS_CODING	905	268	T>T		0.79385	0.81322	0.80361	-	-	-		100	63	A		100	58	A		100	49	A		67.9487	78	A/G		54.2373	59	A/G		43.4783	69	A/G		65.7143	70	A/G		57.5758	99
supercont1.107:2163827	A	G	Substitution	AAEL004096	AAEL004096-RA	Other detox	aldo-keto reductase	SYNONYMOUS_CODING	1004	301	L>L		0.84198	0.78288	0.90399	-	-	-		100	102	G		100	133	G		98.9247	93	G		81.579	114	G		66.1972	71	A/G		61.3207	106	A/G		69.4215	121	A/G		61.3793	145
supercont1.107:2163839	A	T	Substitution	AAEL004096	AAEL004096-RA	Other detox	aldo-keto reductase	SYNONYMOUS_CODING	1016	305	P>P		0.45318	0.84299	0.89535	-	-	-		20.4082	98	ref		0	129	ref		0	97	ref		72.6415	106	A/T		37.3333	75	A/T		33.6634	101	A/T		39.1304	115	A/T		35.0746	134
supercont1.107:2163882	A	T	Substitution	AAEL004096	AAEL004096-RA	Other detox	aldo-keto reductase	3PRIME_UTR	1059				0.79974	0.68995	0.89743	-	-	-		0	66	ref		0	63	ref		0	63	ref		16.8421	95	ref		24.1935	62	ref		22.5	80	A/T		17.7778	90	A/T		19.8113	106
supercont1.107:2163896	CA	C	Deletion	AAEL004096	AAEL004096-RA	Other detox	aldo-keto reductase	3PRIME_UTR	1074				na	na	na	-	na	-		43.1373	51	C/CA		79.4118	34	C/CA		81.0811	37	C/CA		0	90	ref		2.98507	67	ref		4.41176	68	diff		0	79	ref		1.14943	87
supercont1.107:2163897	A	G	Substitution	AAEL004096	AAEL004096-RA	Other detox	aldo-keto reductase	3PRIME_UTR	1074				0.88762	0.89368	0.86853	-	-	-		11.7647	51	diff		0	34	diff		0	37	diff		0	90	ref		10.4478	67	ref		16.1765	68	A/G		7.59494	79	ref		10.3448	87
supercont1.107:2167395	A	T	Substitution	AAEL004088	AAEL004088-RA	Other detox	aldo-keto reductase	5PRIME_UTR	11				0.86207	0.90303	0.89546	Cayn	-	-		90.4255	94	T		100	110	T		100	74	T		16.6667	102	ref		73.0769	104	A/T		65.7143	105	A/T		77.3333	75	A/T		72.807	114
supercont1.107:2167419	C	T	Substitution	AAEL004088	AAEL004088-RA	Other detox	aldo-keto reductase	5PRIME_UTR	35				0.88181	0.89331	0.89398	-	-	-		0	85	ref		0	89	ref		0	56	ref		0	92	ref		0	90	ref		0	85	ref		13.1579	76	C/T		21.1538	104
supercont1.107:2167451	C	T	Substitution	AAEL004088	AAEL004088-RA	Other detox	aldo-keto reductase	5PRIME_UTR	67				0.80586	0.89866	0.89612	-	-	-		0	80	ref		0	85	ref		0	52	ref		0	91	ref		11.5942	69	ref		8.33333	72	ref		12.963	54	C/T		10.7143	84
supercont1.107:2167493	C	T	Substitution	AAEL004088	AAEL004088-RA	Other detox	aldo-keto reductase	5PRIME_UTR	109				0.89198	0.90495	0.90136	Cayn; StGe	-	-		88.3333	60	T		98.3871	62	T		98.1132	53	T		12.2222	90	ref		76.4706	51	C/T		63.6364	55	C/T		77.1429	35	C/T		62.5	80
supercont1.107:2167526	C	A	Substitution	AAEL004088	AAEL004088-RA	Other detox	aldo-keto reductase	INTRONIC					0.22627	0.89212	0.83592	-	-	-		70.1493	67	A/C		100	70	A		98.1132	53	A		0	79	ref		4.34783	46	ref		9.30232	43	ref		21.0526	38	A/C		21.25	80
supercont1.107:2167561	G	A	Substitution	AAEL004088	AAEL004088-RA	Other detox	aldo-keto reductase	INTRONIC					0.86559	0.8985	0.89442	-	-	-		0	69	ref		0	100	ref		0	53	ref		0	75	ref		2.43902	41	ref		11.4286	35	ref		13.7931	58	A/G		27	100
supercont1.107:2167572	A	T	Substitution	AAEL004088	AAEL004088-RA	Other detox	aldo-keto reductase	INTRONIC					0.86083	0.86633	0.85494	Cayn	-	-		0	74	ref		0.952381	105	ref		1.85185	54	ref		0	78	ref		51.0638	47	A/T		22.2222	45	A/T		7.57576	66	ref		3.84615	104
supercont1.107:2167598	TA	T	Deletion	AAEL004088	AAEL004088-RA	Other detox	aldo-keto reductase	INTRONIC					na	na	na	-	na	-		65.8228	79	diff		73.0337	89	diff		73.4694	49	T/TT		0	67	ref		0	63	ref		0	69	ref		0	78	ref		0	134
supercont1.107:2167599	A	T	Substitution	AAEL004088	AAEL004088-RA	Other detox	aldo-keto reductase	INTRONIC					0.89175	0.87875	0.78731	-	-	-		8.86076	79	T/TA		22.4719	89	-/T		16.3265	49	-/T		0	67	ref		0	63	ref		0	69	ref		1.28205	78	ref		0.746269	134
supercont1.107:2167599	AT	A	Deletion	AAEL004088	AAEL004088-RA	Other detox	aldo-keto reductase	INTRONIC					na	na	na	-	na	-		11.5385	78	ref		0	92	ref		0	50	ref		13.5802	81	ref		43.662	71	A/AT		48.5294	68	A/AT		49.3507	77	A/AT		50	136
supercont1.107:2167619	A	G	Substitution	AAEL004088	AAEL004088-RA	Other detox	aldo-keto reductase	INTRONIC					0.86759	0.8924	0.89556	-	-	-		0	82	ref		0	92	ref		0	57	ref		0	104	ref		0	79	ref		0	86	ref		13.0952	84	A/G		11.2903	124
supercont1.107:2167621	C	T	Substitution	AAEL004088	AAEL004088-RA	Other detox	aldo-keto reductase	INTRONIC					0.88815	0.83306	0.89667	-	-	-		12.6582	79	ref		0	91	ref		0	58	ref		18	100	ref		17.5	80	ref		34.1176	85	C/T		31.8182	88	C/T		29.0076	131
supercont1.107:2167644	T	A	Substitution	AAEL004088	AAEL004088-RA	Other detox	aldo-keto reductase	INTRONIC					0.83512	0.89145	0.89894	-	-	-		0	87	ref		0	107	ref		0	86	ref		0.769231	130	ref		21.7822	101	ref		1.96078	102	ref		13.8889	108	A/T		12.5786	159
supercont1.107:2167667	C	A	Substitution	AAEL004088	AAEL004088-RA	Other detox	aldo-keto reductase	INTRONIC					0.85953	0.89307	0.8816	-	-	-		0	97	ref		0	124	ref		0	100	ref		0	147	ref		33.0275	109	A/C		13.5922	103	A/C		3.10078	129	ref		0.613497	163
supercont1.107:2167677	C	T	Substitution	AAEL004088	AAEL004088-RA	Other detox	aldo-keto reductase	INTRONIC					0.7715	0.81963	0.84084	-	-	-		0	94	ref		0	133	ref		0	101	ref		19.1781	146	ref		36.3636	110	C/T		44.0367	109	C/T		42.9688	128	C/T		42.515	167
supercont1.107:2167689	A	C	Substitution	AAEL004088	AAEL004088-RA	Other detox	aldo-keto reductase	INTRONIC					0.87838	0.90251	0.88853	-	-	-		0	110	ref		0	137	ref		0	106	ref		0	142	ref		23.5772	123	ref		13.0435	115	A/C		1.50376	133	ref		0.526316	190
supercont1.107:2167721	C	T	Substitution	AAEL004088	AAEL004088-RA	Other detox	aldo-keto reductase	SPLICE_SITE					0.86207	0.88879	0.82301	-	-	-		0	140	ref		0	162	ref		0	131	ref		0	142	ref		0	124	ref		0	131	ref		15.4362	149	C/T		18.3856	223
supercont1.107:2167785	C	T	Substitution	AAEL004088	AAEL004088-RA	Other detox	aldo-keto reductase	5PRIME_UTR	174				0.80817	0.89881	0.65167	-	-	-		0	155	ref		0	155	ref		0	166	ref		17.7914	163	ref		35.5422	166	C/T		44.0789	152	C/T		57.7181	149	C/T		44.1176	238
supercont1.107:2167788	T	G	Substitution	AAEL004088	AAEL004088-RA	Other detox	aldo-keto reductase	5PRIME_UTR	177				0.81146	0.89498	0.7847	StGe	-	-		0	142	ref		0	149	ref		0	165	ref		16.4384	146	ref		37.9085	153	G/T		44.8052	154	G/T		56.8493	146	overlap		44.4934	227
supercont1.107:2167788	TC	T	Deletion	AAEL004088	AAEL004088-RA	Other detox	aldo-keto reductase	5PRIME_UTR	178				na	na	na	-	na	-		0	149	ref		0	152	ref		0	169	ref		0	162	ref		0	165	ref		0	154	ref		13.7931	145	overlap		17.5439	228
supercont1.107:2167840	A	G	Substitution	AAEL004088	AAEL004088-RA	Other detox	aldo-keto reductase	NON_SYNONYMOUS_CODING	229	9	T>A		0.78292	0.8932	0.90505	-	-	-		0	169	ref		0	187	ref		0	193	ref		0	192	ref		1.10497	181	ref		3.72671	161	ref		5.55556	162	ref		10.8696	230
supercont1.107:2167842	G	A	Substitution	AAEL004088	AAEL004088-RA	Other detox	aldo-keto reductase	SYNONYMOUS_CODING	231	9	T>T		0.76467	0.89535	0.8912	-	-	-		0	161	ref		0	177	ref		0	186	ref		0	188	ref		0	172	ref		0	161	ref		5.92105	152	ref		9.60699	229
supercont1.107:2167903	A	G	Substitution	AAEL004088	AAEL004088-RA	Other detox	aldo-keto reductase	INTRONIC					0.88181	0.90478	0.89851	Cayn; StGe	-	-		91.8033	61	G		100	54	G		100	50	G		10.2804	107	ref		57.1429	84	A/G		48.1013	79	A/G		74.1936	62	A/G		61.5385	117
supercont1.107:2172615	G	A	Substitution	AAEL004088	AAEL004088-RA	Other detox	aldo-keto reductase	INTRONIC					0.8885	0.90165	0.89022	-	-	-		0	50	ref		0	43	ref		0	38	ref		0	50	ref		25	32	ref		25	60	A/G		2.17391	46	ref		0	87
supercont1.107:2172647	T	A	Substitution	AAEL004088	AAEL004088-RA	Other detox	aldo-keto reductase	INTRONIC					0.86959	0.90303	0.89234	-	-	-		0	54	ref		0	75	ref		0	68	ref		0	62	ref		22.6415	53	ref		24.6914	81	A/T		3.27869	61	ref		0.892857	112
supercont1.107:2172747	T	C	Substitution	AAEL004088	AAEL004088-RA	Other detox	aldo-keto reductase	SYNONYMOUS_CODING	354	50	H>H		0.88473	0.88935	0.90085	Cayn	-	-		93.3333	75	C		98.8764	89	C		100	91	C		0	100	ref		53.75	80	C/T		38.5542	83	C/T		23.1884	69	C/T		22.5166	151
supercont1.107:2172783	T	C	Substitution	AAEL004088	AAEL004088-RA	Other detox	aldo-keto reductase	SYNONYMOUS_CODING	390	62	V>V		0.83979	0.89278	0.90446	Cayn	-	-		90.1639	61	C		98.8636	88	C		100	78	C		0	90	ref		50.5882	85	C/T		37.3494	83	C/T		20.6897	87	C/T		25.6579	152
supercont1.107:2172834	A	G	Substitution	AAEL004088	AAEL004088-RA	Other detox	aldo-keto reductase	INTRONIC					0.81735	0.89893	0.90295	-	-	-		65.2778	72	A/G		95.8904	73	G		97.7273	88	G		0	81	ref		30.6667	75	ref		12.8571	70	A/G		23.4568	81	A/G		28.4615	130
supercont1.107:2172879	C	T	Substitution	AAEL004088	AAEL004088-RA	Other detox	aldo-keto reductase	SPLICE_SITE					0.88394	0.89435	0.87478	-	-	-		0	88	ref		0	59	ref		0	71	ref		0	76	ref		7.24638	69	ref		8.4507	71	ref		12.3288	73	C/T		19.8347	121
supercont1.107:2172905	G	A	Substitution	AAEL004088	AAEL004088-RA	Other detox	aldo-keto reductase	SYNONYMOUS_CODING	441	79	T>T		0.87549	0.88015	0.83122	-	-	-		0	89	ref		0	86	ref		0	71	ref		0	77	ref		0	72	ref		0	77	ref		0	77	ref		0	126
supercont1.107:2172914	G	A	Substitution	AAEL004088	AAEL004088-RA	Other detox	aldo-keto reductase	SYNONYMOUS_CODING	450	82	L>L		0.88308	0.88299	0.87411	-	-	-		0	88	ref		0	92	ref		0	80	ref		0	81	ref		0	70	ref		0	82	ref		0	79	ref		0	126
supercont1.107:2172929	T	C	Substitution	AAEL004088	AAEL004088-RA	Other detox	aldo-keto reductase	SYNONYMOUS_CODING	465	87	H>H		0.88743	0.88861	0.90218	-	-	-		9.30232	86	ref		0	99	ref		0	91	ref		0	84	ref		8.21918	73	ref		7.40741	81	ref		0	86	ref		0	130
supercont1.107:2172935	G	T	Substitution	AAEL004088	AAEL004088-RA	Other detox	aldo-keto reductase	SYNONYMOUS_CODING	471	89	P>P		0.83979	0.89331	0.89535	-	-	-		0	89	ref		0	110	ref		0	96	ref		0	77	ref		5.33333	75	ref		3.79747	79	ref		12.9412	85	G/T		17.7419	124
supercont1.107:2173036	G	A	Substitution	AAEL004088	AAEL004088-RA	Other detox	aldo-keto reductase	NON_SYNONYMOUS_CODING	572	123	G>D		0.88248	0.89919	0.85291	-	-	-		76.5432	81	A/G		96.8421	95	A		97.1963	107	A		0	77	ref		33.3333	66	ref		10.2273	88	A/G		37.5	96	A/G		43.4426	122
supercont1.107:2173043	G	A	Substitution	AAEL004088	AAEL004088-RA	Other detox	aldo-keto reductase	SYNONYMOUS_CODING	579	125	L>L		0.88473	0.8985	0.7256	Cayn	-	-		93.0556	72	A		96.875	96	A		98.1651	109	A		0	72	ref		50.7463	67	A/G		27.7778	90	A/G		40.5941	101	A/G		40.3226	124
supercont1.107:2173092	T	G	Substitution	AAEL004088	AAEL004088-RA	Other detox	aldo-keto reductase	NON_SYNONYMOUS_CODING	628	142	L>V		0.87978	0.90209	0.89691	Cayn	-	-		86.4	125	G		93.8776	147	G		97.1014	138	G		1.50376	133	ref		42.8571	112	G/T		28.2051	117	G/T		29.927	137	G/T		38.4211	190
supercont1.107:2173094	G	A	Substitution	AAEL004088	AAEL004088-RA	Other detox	aldo-keto reductase	SYNONYMOUS_CODING	630	142	L>L		0.88609	0.89043	0.89431	-	-	-		13.1783	129	ref		0	145	ref		0	141	ref		0	130	ref		4.62963	108	ref		10.1695	118	A/G		0	137	ref		0	192
supercont1.107:2173106	G	A	Substitution	AAEL004088	AAEL004088-RA	Other detox	aldo-keto reductase	SYNONYMOUS_CODING	642	146	K>K		0.79385	0.90165	0.89578	-	-	-		0	142	ref		0	149	ref		0	154	ref		0	152	ref		17.8862	123	ref		10.1695	118	A/G		3.44828	145	ref		0.938967	213
supercont1.107:2173139	C	T	Substitution	AAEL004088	AAEL004088-RA	Other detox	aldo-keto reductase	SYNONYMOUS_CODING	675	157	A>A		0.84588	0.89293	0.8772	-	-	-		15.528	161	ref		0	157	ref		0	141	ref		0	145	ref		7.24638	138	ref		8.20895	134	ref		0	151	ref		0	210
supercont1.107:2173169	G	T	Substitution	AAEL004088	AAEL004088-RA	Other detox	aldo-keto reductase	SYNONYMOUS_CODING	705	167	S>S		0.85521	0.84299	0.87006	-	-	-		0	166	ref		0.632911	158	ref		0	149	ref		0	137	ref		0	134	ref		0	136	ref		0	158	ref		0	262
supercont1.107:2173195	T	G	Substitution	AAEL004088	AAEL004088-RA	Other detox	aldo-keto reductase	NON_SYNONYMOUS_CODING	731	176	I>S		0.8735	0.85783	0.81857	-	-	-		0	168	ref		0	179	ref		0	169	ref		0	143	ref		0	132	ref		0	132	ref		0	163	ref		0	282
supercont1.107:2173265	C	A	Substitution	AAEL004088	AAEL004088-RA	Other detox	aldo-keto reductase	SYNONYMOUS_CODING	801	199	A>A		0.89097	0.90282	0.90336	-	-	-		81.457	151	A		94.2105	190	A		95.9538	173	A		1.21951	164	ref		38.1356	118	A/C		15.6028	141	A/C		20.8333	168	A/C		27.7027	296
supercont1.107:2173271	C	T	Substitution	AAEL004088	AAEL004088-RA	Other detox	aldo-keto reductase	SYNONYMOUS_CODING	807	201	C>C		0.89073	0.90036	0.88958	-	-	-		70.1863	161	C/T		94.2105	190	T		96.5318	173	T		0.625	160	ref		30.2521	119	C/T		9.77444	133	C/T		23.125	160	C/T		25.9649	285
supercont1.107:2173286	T	C	Substitution	AAEL004088	AAEL004088-RA	Other detox	aldo-keto reductase	SYNONYMOUS_CODING	822	206	I>I		0.88815	0.90396	0.90421	-	-	-		83.3333	180	C		95.1351	185	C		95.9064	171	C		0.518135	193	ref		38.1295	139	C/T		14.3939	132	C/T		27.673	159	C/T		25	284
supercont1.107:2173307	C	A	Substitution	AAEL004088	AAEL004088-RA	Other detox	aldo-keto reductase	SYNONYMOUS_CODING	843	213	P>P		0.79974	0.88968	0.88999	-	-	-		0	159	ref		0	179	ref		0	166	ref		0	180	ref		2.17391	138	ref		1.40845	142	ref		0	149	ref		0.769231	260
supercont1.107:2173370	A	G	Substitution	AAEL004088	AAEL004088-RA	Other detox	aldo-keto reductase	SYNONYMOUS_CODING	906	234	K>K		0.85669	0.89674	0.85155	-	-	-		0	165	ref		0	186	ref		0	162	ref		0	210	ref		16.9935	153	ref		7.56757	185	ref		20.7317	164	A/G		16.791	268
supercont1.107:2173382	T	C	Substitution	AAEL004088	AAEL004088-RA	Other detox	aldo-keto reductase	SYNONYMOUS_CODING	918	238	I>I		0.65821	0.90551	0.90369	Cayn	-	-		71.2707	181	C/T		98.4043	188	C		95.2381	168	C		0.943396	212	ref		47.5177	141	C/T		26.0116	173	C/T		42.1053	171	C/T		39.7769	269
supercont1.107:2173386	A	G	Substitution	AAEL004088	AAEL004088-RA	Other detox	aldo-keto reductase	NON_SYNONYMOUS_CODING	922	240	K>E		0.81986	0.87923	0.88909	-	-	-		0	180	ref		0.526316	190	ref		0	172	ref		0	200	ref		0	136	ref		0	169	ref		16.7665	167	A/G		12.3134	268
supercont1.107:2173448	A	G	Substitution	AAEL004088	AAEL004088-RA	Other detox	aldo-keto reductase	SYNONYMOUS_CODING	984	260	V>V		0.78676	0.89774	0.90136	Cayn	-	-		11.0429	163	ref		0	168	ref		0	186	ref		0	178	ref		48.4663	163	A/G		27.7778	162	A/G		40.6452	155	A/G		37.9167	240
supercont1.107:2173454	C	A	Substitution	AAEL004088	AAEL004088-RA	Other detox	aldo-keto reductase	SYNONYMOUS_CODING	990	262	I>I		0.52998	0.9005	0.9002	-	-	-		0	151	ref		0	162	ref		0	191	ref		0	164	ref		0	155	ref		0	159	ref		15.6863	153	diff		12.3016	252
supercont1.107:2173454	C	T	Substitution	AAEL004088	AAEL004088-RA	Other detox	aldo-keto reductase	SYNONYMOUS_CODING	990	262	I>I		0.52998	0.9005	0.9002	-	-	-		0	151	ref		0	162	ref		0	191	ref		0	164	ref		16.129	155	ref		4.40252	159	ref		24.183	153	C/T		22.619	252
supercont1.107:2173496	G	A	Substitution	AAEL004088	AAEL004088-RA	Other detox	aldo-keto reductase	SYNONYMOUS_CODING	1032	276	E>E		0.69012	0.89698	0.89938	-	-	-		0	140	ref		0	156	ref		0	171	ref		0.746269	134	ref		16.5563	151	ref		4.02685	149	ref		24.031	129	A/G		22.9839	248
supercont1.107:2173594	A	G	Substitution	AAEL004088	AAEL004088-RA	Other detox	aldo-keto reductase	INTRONIC					0.88059	0.8971	0.89851	-	-	-		1.31579	76	ref		0	97	ref		0	98	ref		0	79	ref		16.6667	90	ref		3.94737	76	ref		13.8298	94	A/G		10.7143	112
supercont1.107:2173600	T	A	Substitution	AAEL004088	AAEL004088-RA	Other detox	aldo-keto reductase	INTRONIC					0.435	0.89511	0.90344	Cayn	-	-		22.3881	67	ref		0	95	ref		0	85	ref		0	62	ref		57.8947	76	A/T		33.3333	75	A/T		42.6966	89	overlap		42.8571	105
supercont1.107:2173613	T	C	Substitution	AAEL004088	AAEL004088-RA	Other detox	aldo-keto reductase	INTRONIC					0.86759	0.88475	0.88628	-	-	-		0	73	ref		0	87	ref		0	61	ref		0	61	ref		0	75	ref		0	70	ref		17.7778	90	C/T		17.0213	94
supercont1.107:2173619	T	C	Substitution	AAEL004088	AAEL004088-RA	Other detox	aldo-keto reductase	INTRONIC					0.72917	0.90063	0.90136	-	-	-		0	69	ref		0	85	ref		0	61	ref		0	50	ref		27.6316	76	ref		13.2353	68	C/T		21.3483	89	C/T		31.5789	95
supercont1.107:2173701	T	A	Substitution	AAEL004088	AAEL004088-RA	Other detox	aldo-keto reductase	INTRONIC					0.85813	0.89331	0.82582	-	-	-		0	36	ref		0	58	ref		0	43	ref		0	44	ref		0	43	ref		0	39	ref		12.8205	39	A/T		12.9032	62
supercont1.107:2173979	C	T	Substitution	AAEL004088	AAEL004088-RA	Other detox	aldo-keto reductase	INTRONIC					0.8735	0.89893	0.89905	Cayn	-	-		10	30	ref		0	58	ref		0	46	ref		0	29	lc		46.1538	52	C/T		25.7143	35	C/T		18.75	48	C/T		20	60
supercont1.107:2174078	A	T	Substitution	AAEL004088	AAEL004088-RA	Other detox	aldo-keto reductase	3PRIME_UTR	1195				0.88142	0.89278	0.89398	-	-	-		1.5873	63	ref		0	106	ref		0	97	ref		0	89	ref		11.1111	72	ref		0	76	ref		7.57576	66	ref		13.3333	90
supercont1.107:2174094	G	T	Substitution	AAEL004088	AAEL004088-RA	Other detox	aldo-keto reductase	3PRIME_UTR	1211				0.89044	0.88643	0.89248	-	-	-		6.41026	78	ref		0	115	ref		0	100	ref		1.06383	94	ref		19.0476	84	ref		1.21951	82	ref		12.6582	79	G/T		17.757	107
supercont1.107:2174202	TA	T	Deletion	AAEL004088	AAEL004088-RA	Other detox	aldo-keto reductase	3PRIME_UTR	1320				na	na	na	-	na	-		0	44	ref		0	77	ref		0	64	ref		0	52	ref		0	46	ref		0	42	ref		17.6471	51	T/TA		14.1026	78
supercont1.108:2059068	C	T	Substitution	AAEL004135	AAEL004135-RA	Other detox	sterol desaturase	NON_SYNONYMOUS_CODING	635	212	R>H		0.83763	0.87826	0.88113	Nakh	-	-		0	76	ref		0	85	ref		0	104	ref		0	80	ref		0	86	ref		0	76	ref		0	68	ref		0	110
supercont1.108:2059139	A	G	Substitution	AAEL004135	AAEL004135-RA	Other detox	sterol desaturase	SYNONYMOUS_CODING	564	188	F>F		0.81735	0.90511	0.90351	-	-	-		27.381	84	ref		32.3529	68	A/G		34	100	A/G		98.6842	76	G		56	75	A/G		53.4483	58	A/G		53.3333	60	A/G		41.4414	111
supercont1.108:2060869	C	A	Substitution	AAEL004135	AAEL004135-RA	Other detox	sterol desaturase	SYNONYMOUS_CODING	198	66	L>L		0.87936	0.87675	0.8789	-	-	-		27.907	43	ref		17.0732	41	A/C		2.32558	43	ref		0	56	ref		0	43	ref		0	30	ref		0	46	ref		0	88
supercont1.108:2060899	A	G	Substitution	AAEL004135	AAEL004135-RA	Other detox	sterol desaturase	SYNONYMOUS_CODING	168	56	A>A		0.88921	0.85891	0.83436	-	-	-		21.875	32	ref		10.5263	38	ref		2.32558	43	ref		0	53	ref		5.12821	39	ref		13.8889	36	A/G		0	47	ref		2.73973	73
supercont1.108:2070962	A	T	Substitution	AAEL004135	AAEL004135-RA	Other detox	sterol desaturase	SYNONYMOUS_CODING	54	18	P>P		0.84415	0.89866	0.88958	-	-	-		10	40	ref		8.77193	57	ref		8.33333	48	ref		0	54	ref		7.69231	52	ref		15.625	64	A/T		1.49254	67	ref		0.934579	107
supercont1.108:2070968	A	C	Substitution	AAEL004135	AAEL004135-RA	Other detox	sterol desaturase	SYNONYMOUS_CODING	48	16	T>T		0.64084	0.88781	0.89042	-	-	-		4.34783	46	ref		11.1111	63	A/C		10.2041	49	ref		0	62	ref		0	52	ref		0	70	diff		0	71	ref		0	113
supercont1.108:2070968	A	G	Substitution	AAEL004135	AAEL004135-RA	Other detox	sterol desaturase	SYNONYMOUS_CODING	48	16	T>T		0.64084	0.88781	0.89042	-	-	-		4.34783	46	ref		1.5873	63	diff		0	49	ref		0	62	ref		5.76923	52	ref		17.1429	70	A/G		1.40845	71	ref		0.884956	113
supercont1.108:2082475	T	C	Substitution	AAEL004126	AAEL004126-RA	Other detox	sterol desaturase	SYNONYMOUS_CODING	687	199	V>V		0.86333	0.72149	0.88113	-	-	-		19.1011	89	ref		14.2857	77	C/T		15.7303	89	C/T		38.3721	86	C/T		39.6226	53	C/T		28.9855	69	C/T		35.8025	81	C/T		25.3968	126
supercont1.108:2082553	G	A	Substitution	AAEL004126	AAEL004126-RA	Other detox	sterol desaturase	SYNONYMOUS_CODING	609	173	Y>Y		0.81146	0.90022	0.892	-	-	-		0	94	ref		0	75	ref		0	98	ref		0	70	ref		24.5902	61	ref		12.1212	66	ref		16.1616	99	A/G		16.4286	140
supercont1.108:2082610	C	T	Substitution	AAEL004126	AAEL004126-RA	Other detox	sterol desaturase	SYNONYMOUS_CODING	552	154	K>K		0.78676	0.84772	0.89691	-	-	-		26.506	83	ref		26.087	69	C/T		28.3951	81	C/T		33.3333	51	ref		14.4737	76	ref		18.5714	70	C/T		8.08081	99	ref		9.24855	173
supercont1.108:2082625	G	A	Substitution	AAEL004126	AAEL004126-RA	Other detox	sterol desaturase	SYNONYMOUS_CODING	537	149	H>H		0.88863	0.88667	0.86036	-	-	-		10.3774	106	ref		22.6804	97	A/G		22.8261	92	A/G		0	76	ref		0	85	ref		0	96	ref		0	104	ref		0	190
supercont1.108:2082631	C	T	Substitution	AAEL004126	AAEL004126-RA	Other detox	sterol desaturase	SYNONYMOUS_CODING	531	147	L>L		0.88278	0.88338	0.87079	-	-	-		13.0841	107	ref		20.6186	97	C/T		21.6981	106	C/T		0	67	ref		0	88	ref		0	94	ref		0	109	ref		0	193
supercont1.108:2082658	A	G	Substitution	AAEL004126	AAEL004126-RA	Other detox	sterol desaturase	SYNONYMOUS_CODING	504	138	I>I		0.89004	0.76733	0.67447	-	-	-		37.1429	105	A/G		52.381	105	A/G		41.7391	115	A/G		35.6436	101	A/G		30.0971	103	A/G		22.1154	104	A/G		38.6555	119	A/G		27.2727	176
supercont1.108:2082670	G	A	Substitution	AAEL004126	AAEL004126-RA	Other detox	sterol desaturase	SYNONYMOUS_CODING	492	134	F>F		0.85238	0.89423	0.85419	-	-	-		0	131	ref		0	105	ref		0	131	ref		32.1101	109	A/G		10.8911	101	ref		6.60377	106	ref		28.9256	121	A/G		13.3333	180
supercont1.108:2082702	T	C	Substitution	AAEL004126	AAEL004126-RA	Other detox	sterol desaturase	NON_SYNONYMOUS_CODING	460	124	T>A		0.81146	0.87613	0.88797	-	-	-		13.6842	95	ref		14.2857	84	C/T		21.6216	111	C/T		0	102	ref		0	87	ref		0	94	ref		0	115	ref		0	176
supercont1.108:2082721	T	A	Substitution	AAEL004126	AAEL004126-RA	Other detox	sterol desaturase	SYNONYMOUS_CODING	441	117	R>R		0.79974	0.85783	0.8949	-	-	-		6.94444	72	ref		11.25	80	ref		6.89655	87	ref		28.75	80	ref		5	80	ref		7.6087	92	ref		16.0377	106	A/T		5.29412	170
supercont1.108:2082753	G	A	Substitution	AAEL004126	AAEL004126-RA	Other detox	sterol desaturase	SYNONYMOUS_CODING	409	107	L>L		0.8789	0.88299	0.8917	-	-	-		0	57	ref		0	85	ref		0	79	ref		20.6522	92	ref		3.79747	79	ref		6.17284	81	ref		16.6667	90	A/G		5.16129	155
supercont1.108:2082756	G	A	Substitution	AAEL004126	AAEL004126-RA	Other detox	sterol desaturase	NON_SYNONYMOUS_CODING	406	106	H>Y		0.8492	0.87826	0.88257	-	-	-		14.2857	56	ref		17.2414	87	A/G		26.25	80	A/G		0	85	ref		0	79	ref		0	80	ref		0	89	ref		0	150
supercont1.108:2082757	A	G	Substitution	AAEL004126	AAEL004126-RA	Other detox	sterol desaturase	SYNONYMOUS_CODING	405	105	F>F		0.82275	0.84211	0.89376	-	-	-		0	54	ref		0	88	ref		0	81	ref		23.3766	77	ref		6.66667	75	ref		5.06329	79	ref		17.7778	90	A/G		5.40541	148
supercont1.108:2082784	A	T	Substitution	AAEL004126	AAEL004126-RA	Other detox	sterol desaturase	SYNONYMOUS_CODING	378	96	I>I		0.87978	0.89473	0.88349	-	-	-		14.8936	47	ref		20.2703	74	A/T		18.3099	71	A/T		0	71	ref		7.59494	79	ref		9.23077	65	ref		0	65	ref		11.2	125
supercont1.108:2082808	C	T	Substitution	AAEL004126	AAEL004126-RA	Other detox	sterol desaturase	SYNONYMOUS_CODING	354	88	T>T		0.87726	0.87729	0.84506	-	-	-		15.7895	38	ref		16.129	62	C/T		24.4898	49	C/T		0	55	ref		0	60	ref		0	38	ref		0	45	ref		1.02041	98
supercont1.108:2082917	C	A	Substitution	AAEL004126	AAEL004126-RA	Other detox	sterol desaturase	SYNONYMOUS_CODING	306	72	G>G		0.89679	0.8985	0.89042	Cayn	-	-		28.8462	52	ref		59.2593	54	A/C		44.898	49	A/C		92.6829	41	A		46.1538	39	A/C		57.5	40	A/C		54	50	A/C		41.8367	98
supercont1.108:2083010	A	G	Substitution	AAEL004126	AAEL004126-RA	Other detox	sterol desaturase	SYNONYMOUS_CODING	213	41	V>V		0.8842	0.89168	0.8942	-	-	-		100	59	G		100	60	G		100	64	G		100	56	G		100	34	G		100	49	G		100	43	G		100	77
supercont1.108:2083036	A	G	Substitution	AAEL004126	AAEL004126-RA	Other detox	sterol desaturase	NON_SYNONYMOUS_CODING	187	33	Y>H		0.86083	0.85713	0.89578	-	-	-		0	49	ref		0	47	ref		0	42	ref		0	49	ref		0	36	ref		0	42	ref		0	44	ref		0	75
supercont1.108:2083052	G	A	Substitution	AAEL004126	AAEL004126-RA	Other detox	sterol desaturase	SYNONYMOUS_CODING	171	27	D>D		0.88278	0.84922	0.90218	-	-	-		10.5263	38	ref		2.7027	37	ref		0	38	ref		0	46	ref		0	35	ref		0	39	ref		0	36	ref		0	68
supercont1.108:2091879	C	T	Substitution	AAEL004126	AAEL004126-RA	Other detox	sterol desaturase	INTRONIC					0.89186	0.90456	0.90509	Cayn; Nakh	-	-		45.5882	68	C/T		70.7692	65	C/T		82.0896	67	C/T		97.3684	38	T		16.3636	55	ref		38.0952	42	C/T		19.6078	51	C/T		17.7083	96
supercont1.108:2091887	G	A	Substitution	AAEL004126	AAEL004126-RA	Other detox	sterol desaturase	INTRONIC					0.89359	0.82603	0.90125	Cayn; Nakh	-	-		13.6986	73	ref		35.9375	64	A/G		23.8806	67	A/G		100	35	A		16.9811	53	ref		40	40	A/G		17.6471	51	A/G		18.4783	92
supercont1.108:2114112	T	C	Substitution	AAEL004126	AAEL004126-RA	Other detox	sterol desaturase	5PRIME_UTR	71				0.87838	0.80375	0.35691	Nakh	-	-		85.7143	56	C		82.5	80	C/T		92.5926	54	C		35.9551	89	C/T		42.8571	56	C/T		36.0656	61	C/T		53.0864	81	C/T		41.8182	110
supercont1.109:1865353	G	A	Substitution	AAEL004163	AAEL004163-RA	Other detox	o-fucosyltransferase	3PRIME_UTR	2355				0.87978	0.85217	0.89589	-	-	-		0	70	ref		1.75439	57	ref		0	53	ref		0	56	ref		0	35	ref		0	38	ref		0	33	ref		0	46
supercont1.109:1865372	G	A	Substitution	AAEL004163	AAEL004163-RA	Other detox	o-fucosyltransferase	3PRIME_UTR	2336				0.83034	0.36176	0.89479	-	-	-		0	86	ref		0	72	ref		0	63	ref		0	67	ref		80.7692	52	A		75.9259	54	A/G		83.7209	43	A/G		86.5385	52
supercont1.109:1865377	C	T	Substitution	AAEL004163	AAEL004163-RA	Other detox	o-fucosyltransferase	3PRIME_UTR	2331				0.85087	0.32655	0.89743	-	-	-		0	90	ref		0	79	ref		0	64	ref		0	71	ref		81.4815	54	T		78.3333	60	C/T		84.4444	45	C/T		87.7193	57
supercont1.109:1865434	T	C	Substitution	AAEL004163	AAEL004163-RA	Other detox	o-fucosyltransferase	3PRIME_UTR	2274				0.67408	0.24108	0.89442	Cayn	-	-		0	113	ref		0	132	ref		0	116	ref		0	91	ref		83.3333	96	C		76.0417	96	C/T		85.3658	82	C/T		91.0569	123
supercont1.109:1865496	T	A	Substitution	AAEL004163	AAEL004163-RA	Other detox	o-fucosyltransferase	3PRIME_UTR	2212				0.76078	0.78511	0.81758	Cayn	-	-		0	125	ref		0.60241	166	ref		0	124	ref		0.847458	118	ref		88.2353	119	A		78.1513	119	A/T		85.9259	135	A/T		86.3095	168
supercont1.109:1865514	A	T	Substitution	AAEL004163	AAEL004163-RA	Other detox	o-fucosyltransferase	3PRIME_UTR	2194				0.87199	0.75573	0.90167	Cayn	-	-		7.29927	137	ref		2.36686	169	ref		4.65116	129	ref		0.75188	133	ref		88.5496	131	T		80.9859	142	A/T		87.8788	132	A/T		89.7297	185
supercont1.109:1865674	G	A	Substitution	AAEL004163	AAEL004163-RA	Other detox	o-fucosyltransferase	SYNONYMOUS_CODING	2034	446	G>G		0.84415	0.06864	0.89502	StGe	-	-		0.671141	149	ref		0.613497	163	ref		0	180	ref		0	146	ref		89.2308	130	A		87.1508	179	A/G		93.0818	159	A		86.5471	223
supercont1.109:1865728	C	G	Substitution	AAEL004163	AAEL004163-RA	Other detox	o-fucosyltransferase	SYNONYMOUS_CODING	1980	428	L>L		0.88101	0.86782	0.90239	-	-	-		0	129	ref		0	168	ref		0	151	ref		0	162	ref		0	146	ref		0	148	ref		0	162	ref		0	202
supercont1.109:1865761	G	A	Substitution	AAEL004163	AAEL004163-RA	Other detox	o-fucosyltransferase	SYNONYMOUS_CODING	1947	417	F>F		0.79385	0.093292	0.89589	-	-	-		1.51515	132	ref		0	158	ref		0	170	ref		0	166	ref		88.961	154	A		85.9375	128	A/G		89.6774	155	A/G		88.4058	207
supercont1.109:1865809	A	G	Substitution	AAEL004163	AAEL004163-RA	Other detox	o-fucosyltransferase	SYNONYMOUS_CODING	1899	401	I>I		0.87274	0.11773	0.89022	-	-	-		2.85714	105	ref		0	148	ref		1.2987	154	ref		0	145	ref		88.9706	136	G		87.7049	122	A/G		85.7143	126	A/G		90.3743	187
supercont1.109:1865815	G	C	Substitution	AAEL004163	AAEL004163-RA	Other detox	o-fucosyltransferase	NON_SYNONYMOUS_CODING	1893	399	D>E		0.87783	0.88411	0.90065	-	-	-		0	103	ref		0	155	ref		0	144	ref		0	154	ref		0	133	ref		0	123	ref		0	119	ref		0	189
supercont1.109:1865833	G	A	Substitution	AAEL004163	AAEL004163-RA	Other detox	o-fucosyltransferase	SYNONYMOUS_CODING	1875	393	G>G		0.87613	0.85957	0.8912	-	-	-		7.29167	96	ref		3.31126	151	ref		8.94309	123	A/G		0	135	ref		0	109	ref		0	113	ref		0	117	ref		0	192
supercont1.109:1865917	A	G	Substitution	AAEL004163	AAEL004163-RA	Other detox	o-fucosyltransferase	SYNONYMOUS_CODING	1791	365	H>H		0.83034	0.87314	0.89703	-	-	-		0	153	ref		0	146	ref		0	163	ref		1.1236	178	ref		0	95	ref		0	99	ref		0	125	ref		0	182
supercont1.109:1865953	C	T	Substitution	AAEL004163	AAEL004163-RA	Other detox	o-fucosyltransferase	SYNONYMOUS_CODING	1755	353	V>V		0.8256	0.16418	0.90032	Cayn; StGe	-	-		0.719425	139	ref		0	132	ref		0	176	ref		0	148	ref		67.7966	59	C/T		58.4906	53	C/T		89.2308	65	C/T		74.2574	101
supercont1.109:1865956	C	T	Substitution	AAEL004163	AAEL004163-RA	Other detox	o-fucosyltransferase	SYNONYMOUS_CODING	1752	352	K>K		0.78292	0.13797	0.89589	Cayn; StGe	-	-		0.719425	139	ref		0	130	ref		0	175	ref		0	151	ref		67.2727	55	C/T		58.3333	48	C/T		90	60	C/T		72.165	97
supercont1.109:1866012	A	G	Substitution	AAEL004163	AAEL004163-RA	Other detox	o-fucosyltransferase	SYNONYMOUS_CODING	1696	334	L>L		0.79693	0.70195	0.87411	Cayn; StGe	-	-		0	130	ref		0	136	ref		0	145	ref		0	127	ref		65	40	A/G		42.8571	35	A/G		70.9677	31	A/G		50	64
supercont1.109:1866016	A	G	Substitution	AAEL004163	AAEL004163-RA	Other detox	o-fucosyltransferase	SYNONYMOUS_CODING	1692	332	P>P		0.87199	0.66972	0.88516	Cayn; StGe	-	-		0	127	ref		0	133	ref		0	145	ref		0	120	ref		66.6667	39	A/G		47.5	40	A/G		71.4286	35	A/G		60	70
supercont1.109:1866031	C	T	Substitution	AAEL004163	AAEL004163-RA	Other detox	o-fucosyltransferase	SYNONYMOUS_CODING	1677	327	R>R		0.72917	0.5544	0.89387	Cayn	-	-		0	127	ref		0	129	ref		0	125	ref		0	110	ref		73.3333	60	C/T		59.6154	52	C/T		70.3704	54	C/T		75.9036	83
supercont1.109:1866090	A	T	Substitution	AAEL004163	AAEL004163-RA	Other detox	o-fucosyltransferase	NON_SYNONYMOUS_CODING	1618	308	S>T		0.68581	0.43001	0.89315	-	-	-		0	62	ref		0	81	ref		0	74	ref		0	84	ref		76.7442	43	A/T		78.4314	51	A/T		81.25	64	A/T		84.0426	94
supercont1.109:1866157	G	A	Substitution	AAEL004163	AAEL004163-RA	Other detox	o-fucosyltransferase	SYNONYMOUS_CODING	1551	285	N>N		0.87488	0.84037	0.89409	-	-	-		1.40845	71	ref		0	78	ref		0	74	ref		0	70	ref		61.5385	39	A/G		64.2857	42	A/G		62.5	32	A/G		83.0189	53
supercont1.109:1866170	A	T	Substitution	AAEL004163	AAEL004163-RA	Other detox	o-fucosyltransferase	NON_SYNONYMOUS_CODING	1538	281	L>Q		0.8842	0.88226	0.8949	-	-	-		1.35135	74	ref		0	81	ref		0	88	ref		0	84	ref		57.1429	35	A/T		64.8649	37	A/T		50	30	A/T		73.1707	41
supercont1.109:1866300	T	G	Substitution	AAEL004163	AAEL004163-RA	Other detox	o-fucosyltransferase	NON_SYNONYMOUS_CODING	1408	238	I>L		0.86207	0.78845	0.89815	-	-	-		2.77778	108	ref		0.740741	135	ref		2.7972	143	ref		0	122	ref		63.4615	52	G/T		64.4444	45	G/T		69.2308	52	G/T		83.75	80
supercont1.109:1866308	T	C	Substitution	AAEL004163	AAEL004163-RA	Other detox	o-fucosyltransferase	NON_SYNONYMOUS_CODING	1400	235	Y>C		0.87274	0.88098	0.89589	-	-	-		0	109	ref		0	138	ref		0	144	ref		0	116	ref		0	63	ref		0	52	ref		0	61	ref		0	97
supercont1.109:1866451	T	G	Substitution	AAEL004163	AAEL004163-RA	Other detox	o-fucosyltransferase	SYNONYMOUS_CODING	1257	187	T>T		0.87199	0.89994	0.86928	-	-	-		3.36134	119	ref		0	174	ref		1.5544	193	ref		0	189	ref		35.2941	34	ref		35.7143	42	G/T		40.4762	42	G/T		60.7843	51
supercont1.109:1866487	G	C	Substitution	AAEL004163	AAEL004163-RA	Other detox	o-fucosyltransferase	SYNONYMOUS_CODING	1221	175	G>G		0.88473	0.45305	0.89524	-	-	-		6.25	128	ref		1.16959	171	ref		4.18848	191	ref		0	179	ref		73.494	83	C/G		72.9412	85	C/G		77.5	80	C/G		80.9524	126
supercont1.109:1866520	C	G	Substitution	AAEL004163	AAEL004163-RA	Other detox	o-fucosyltransferase	SYNONYMOUS_CODING	1188	164	R>R		0.75692	0.18219	0.89234	-	-	-		2.18978	137	ref		0	156	ref		0	184	ref		0	184	ref		81.4516	124	G		76.9231	117	C/G		85.3211	109	C/G		85.2273	176
supercont1.109:1866559	T	G	Substitution	AAEL004163	AAEL004163-RA	Other detox	o-fucosyltransferase	SYNONYMOUS_CODING	1149	151	P>P		0.8735	0.86029	0.90032	-	-	-		0	116	ref		0	145	ref		0	191	ref		0	131	ref		0	115	ref		0	120	ref		0	127	ref		0	185
supercont1.109:1866614	G	A	Substitution	AAEL004163	AAEL004163-RA	Other detox	o-fucosyltransferase	NON_SYNONYMOUS_CODING	1094	133	A>V		0.81458	0.22802	0.90043	Cayn	-	Yes		2.58621	116	ref		0	114	ref		0.724638	138	ref		0	106	ref		83.1579	95	A		77.5701	107	A/G		86.9159	107	A/G		87.3418	158
supercont1.109:1866775	T	C	Substitution	AAEL004163	AAEL004163-RA	Other detox	o-fucosyltransferase	SYNONYMOUS_CODING	933	79	L>L		0.88498	0.35951	0.89218	-	-	-		7.54717	53	ref		9.7561	41	ref		14	50	C/T		0	35	ref		88.0952	42	C		83.7209	43	C/T		89.6552	58	C/T		87.5	64
supercont1.109:1867034	A	G	Substitution	AAEL004163	AAEL004163-RA	Other detox	o-fucosyltransferase	INTRONIC					0.8492	0.17502	0.842	Cayn	-	-		1.42857	70	ref		0	78	ref		0	69	ref		0	63	ref		93.2203	59	G		81.6667	60	A/G		83.6364	55	A/G		87.8049	82
supercont1.109:1867039	A	T	Substitution	AAEL004163	AAEL004163-RA	Other detox	o-fucosyltransferase	INTRONIC					0.78292	0.86494	0.89567	-	-	-		0	68	ref		0	85	ref		0	71	ref		0	68	ref		0	61	ref		0	68	ref		0	58	ref		0	83
supercont1.109:1867075	A	AG	Insertion	AAEL004163	AAEL004163-RA	Other detox	o-fucosyltransferase	5PRIME_UTR	690				na	na	na	-	na	-		0	82	ref		0	111	ref		0	88	ref		0	86	ref		0	77	ref		0	90	ref		0	79	ref		0	119
supercont1.109:1867135	A	C	Substitution	AAEL004163	AAEL004163-RA	Other detox	o-fucosyltransferase	5PRIME_UTR	631				0.63609	0.088577	0.90385	Cayn	-	-		0	106	ref		0	132	ref		0	122	ref		0	124	ref		90.9091	99	C		82.7957	93	A/C		91.9192	99	A/C		92.5	160
supercont1.109:1867141	T	G	Substitution	AAEL004163	AAEL004163-RA	Other detox	o-fucosyltransferase	5PRIME_UTR	625				0.8667	0.88802	0.90167	-	-	-		0	103	ref		0	125	ref		0	117	ref		0	127	ref		0	97	ref		0	92	ref		0	99	ref		0	154
supercont1.109:1867158	C	T	Substitution	AAEL004163	AAEL004163-RA	Other detox	o-fucosyltransferase	5PRIME_UTR	608				0.73236	0.083811	0.89725	-	-	-		0	122	ref		0	119	ref		0.854701	117	ref		0	138	ref		88.785	107	T		84.9462	93	C/T		92.6316	95	C/T		93.2515	163
supercont1.109:1867198	T	A	Substitution	AAEL004163	AAEL004163-RA	Other detox	o-fucosyltransferase	5PRIME_UTR	568				0.86207	0.88475	0.89861	-	-	-		0	126	ref		0	128	ref		0	122	ref		0	154	ref		0	117	ref		0	126	ref		0	121	ref		0	170
supercont1.109:1867250	G	A	Substitution	AAEL004163	AAEL004163-RA	Other detox	o-fucosyltransferase	5PRIME_UTR	516				0.87936	0.88667	0.90295	-	-	-		0	94	ref		0	94	ref		1.0989	91	ref		0	155	ref		0	94	ref		0	115	ref		0	112	ref		0.746269	134
supercont1.109:1867287	T	C	Substitution	AAEL004163	AAEL004163-RA	Other detox	o-fucosyltransferase	5PRIME_UTR	479				0.85669	0.88226	0.89101	-	-	-		9.09091	88	ref		5.7971	69	ref		10.4478	67	C/T		0	128	ref		0	53	ref		0	62	ref		0	54	ref		0	60
supercont1.109:1867413	C	G	Substitution	AAEL004163	AAEL004163-RA	Other detox	o-fucosyltransferase	5PRIME_UTR	353				0.84769	0.51762	0.80361	Cayn	-	-		0	55	ref		0	59	ref		0	46	ref		0	82	ref		69.7674	43	C/G		61.1111	36	C/G		81.25	32	C/G		84.8485	33
supercont1.109:1867464	T	A	Substitution	AAEL004163	AAEL004163-RA	Other detox	o-fucosyltransferase	5PRIME_UTR	302				0.75692	0.34571	0.8772	Cayn; StGe	-	-		0	63	ref		0	64	ref		0	54	ref		0	80	ref		81.8182	44	A		74.2857	35	A/T		83.7209	43	A/T		77.7778	36
supercont1.109:1867613	C	CAA	Insertion	AAEL004163	AAEL004163-RA	Other detox	o-fucosyltransferase	5PRIME_UTR	152				na	na	na	-	na	-		0	99	ref		0	88	ref		0	92	ref		0	55	ref		52.9412	34	C/CAA		48.6487	37	C/CAA		50	32	C/CAA		54	50
supercont1.109:1954801	T	A	Substitution	AAEL004180	AAEL004180-RA	Other	hypothetical protein	INTRONIC					0.8878	0.87055	0.81914	-	-	-		1.66667	60	ref		0	66	ref		0	65	ref		0	80	ref		0	38	ref		0	57	ref		1.40845	71	ref		0	107
supercont1.109:1954885	C	T	Substitution	AAEL004180	AAEL004180-RA	Other	hypothetical protein	SYNONYMOUS_CODING	866	285	L>L		0.5983	0.89957	0.85223	-	-	-		100	81	T		100	95	T		100	77	T		1.85185	108	ref		32.3529	68	C/T		37.8378	74	C/T		16.6667	96	C/T		8.4507	142
supercont1.109:2043885	G	A	Substitution	AAEL004180	AAEL004180-RA	Other	hypothetical protein	SYNONYMOUS_CODING	452	147	N>N		0.81735	0.89423	0.88305	-	-	-		0	78	ref		0	87	ref		0	97	ref		0	93	ref		11.8421	76	ref		2.53165	79	ref		14.8148	81	A/G		10.3175	126
supercont1.109:2043900	G	A	Substitution	AAEL004180	AAEL004180-RA	Other	hypothetical protein	SYNONYMOUS_CODING	437	142	D>D		0.88635	0.89043	0.8917	-	-	-		0	92	ref		0	104	ref		0	101	ref		0	110	ref		9.47368	95	ref		4.16667	96	ref		5.74713	87	ref		6.29371	143
supercont1.109:2043942	A	G	Substitution	AAEL004180	AAEL004180-RA	Other	hypothetical protein	SYNONYMOUS_CODING	395	128	V>V		0.76078	0.90391	0.88516	-	-	-		8.69565	69	ref		8.04598	87	ref		5.55556	72	ref		0	82	ref		23.1884	69	ref		11.2676	71	A/G		16.9231	65	A/G		13.6752	117
supercont1.109:2043996	C	T	Substitution	AAEL004180	AAEL004180-RA	Other	hypothetical protein	SYNONYMOUS_CODING	341	110	G>G		0.81986	0.89786	0.85348	-	-	-		6.66667	45	ref		7.14286	56	ref		0	53	ref		0	44	ref		9.52381	42	ref		7.69231	39	ref		19.6078	51	C/T		9.7561	82
supercont1.109:2044151	T	C	Substitution	AAEL004180	AAEL004180-RA	Other	hypothetical protein	INTRONIC					0.86207	0.89621	0.88958	-	-	-		0	52	ref		0	57	ref		0	63	ref		0	67	ref		13.8462	65	ref		6.89655	58	ref		12.3288	73	C/T		7.92079	101
supercont1.109:2044182	C	A	Substitution	AAEL004180	AAEL004180-RA	Other	hypothetical protein	INTRONIC					0.88248	0.89498	0.892	-	-	-		1.75439	57	ref		6.55738	61	ref		6.25	80	ref		0	82	ref		9.63855	83	ref		11.1111	72	A/C		14.8148	81	A/C		6.25	128
supercont1.109:2044352	G	A	Substitution	AAEL004180	AAEL004180-RA	Other	hypothetical protein	SYNONYMOUS_CODING	44	11	S>S		0.54441	0.89906	0.88	-	-	-		96.3636	55	A		100	46	A		100	45	A		0	111	ref		11.9048	84	ref		7.76699	103	ref		12	100	A/G		7.17949	195
supercont1.109:2044389	G	T	Substitution	AAEL004180	AAEL004180-RA	Other	hypothetical protein	5PRIME_UTR	7				0.65376	0.88986	0.85781	-	-	-		93.2203	59	T		100	42	T		100	42	T		0	120	ref		5.05051	99	ref		4.3956	91	ref		8.33333	96	ref		5.35714	168
supercont1.1094:186206	T	A	Substitution	AAEL014379	AAEL014379-RA	Other detox	adrenodoxin	3PRIME_UTR	1477				0.87419	0.90063	0.86036	-	-	-		2.43902	41	ref		0	53	ref		0	47	ref		0	37	ref		22.0339	59	ref		14.2857	35	A/T		41.3043	46	A/T		38.3333	60
supercont1.1094:186214	C	A	Substitution	AAEL014379	AAEL014379-RA	Other detox	adrenodoxin	3PRIME_UTR	1469				0.86759	0.90189	0.87209	-	-	-		0	41	ref		0	58	ref		0	51	ref		0	41	ref		26.5625	64	ref		27.907	43	A/C		7.14286	56	ref		1.5625	64
supercont1.1094:186240	T	A	Substitution	AAEL014379	AAEL014379-RA	Other detox	adrenodoxin	3PRIME_UTR	1443				0.88521	0.87729	0.85155	-	-	-		63.2653	49	A/T		44.8718	78	A/T		37.5	56	A/T		0	51	ref		0	81	ref		0	61	ref		0	67	ref		0	87
supercont1.1094:186282	TG	T	Deletion	AAEL014379	AAEL014379-RA	Other detox	adrenodoxin	3PRIME_UTR	1400				na	na	na	-	na	-		57.6271	59	T/TG		35	80	T/TG		28.3582	67	T/TG		0	65	ref		0	98	ref		0	81	ref		0	73	ref		0	120
supercont1.1094:186303	T	C	Substitution	AAEL014379	AAEL014379-RA	Other detox	adrenodoxin	3PRIME_UTR	1380				0.87978	0.86782	0.89679	-	-	-		0	58	ref		0	74	ref		0	68	ref		0	70	ref		0	102	ref		0	77	ref		0	80	ref		0	123
supercont1.1094:186320	G	A	Substitution	AAEL014379	AAEL014379-RA	Other detox	adrenodoxin	3PRIME_UTR	1363				0.89483	0.89786	0.89442	-	-	-		33.3333	72	A/G		59.1549	71	A/G		56	75	A/G		75	64	A/G		69.3878	98	A/G		69.0141	71	A/G		41.3333	75	A/G		56.1983	121
supercont1.1094:186417	G	T	Substitution	AAEL014379	AAEL014379-RA	Other detox	adrenodoxin	3PRIME_UTR	1266				0.87488	0.87613	0.89645	-	-	-		0	101	ref		0	122	ref		0	129	ref		0	109	ref		0	120	ref		0	116	ref		0	92	ref		0	163
supercont1.1094:186420	A	T	Substitution	AAEL014379	AAEL014379-RA	Other detox	adrenodoxin	3PRIME_UTR	1263				0.88142	0.88299	0.8912	-	-	-		35.7143	112	A/T		47.0085	117	A/T		46.6667	135	A/T		71.0526	114	A/T		33.5938	128	A/T		28.5714	119	A/T		29.8851	87	A/T		31.4815	162
supercont1.1094:186484	A	G	Substitution	AAEL014379	AAEL014379-RA	Other detox	adrenodoxin	3PRIME_UTR	1199				0.81146	0.88059	0.90344	-	-	-		0	130	ref		0	124	ref		0	150	ref		0	117	ref		0	122	ref		0	139	ref		0.787402	127	ref		1.38889	216
supercont1.1094:186493	G	A	Substitution	AAEL014379	AAEL014379-RA	Other detox	adrenodoxin	3PRIME_UTR	1190				0.79385	0.89801	0.88766	-	-	-		0	124	ref		0	121	ref		0	149	ref		0	104	ref		16.8224	107	ref		25.3968	126	A/G		2.43902	123	ref		2.30415	217
supercont1.1094:186535	G	A	Substitution	AAEL014379	AAEL014379-RA	Other detox	adrenodoxin	SYNONYMOUS_CODING	1148	126	A>A		0.8942	0.86633	0.89535	-	-	-		35.1852	108	A/G		52.1739	115	A/G		48.3871	124	A/G		65.6566	99	A/G		27.2727	110	ref		28.4314	102	A/G		33.7209	86	A/G		35.2601	173
supercont1.1094:186658	C	T	Substitution	AAEL014379	AAEL014379-RA	Other detox	adrenodoxin	SYNONYMOUS_CODING	1025	85	E>E		0.85953	0.88823	0.89785	-	-	-		0	92	ref		0	88	ref		0	109	ref		0	79	ref		2.08333	96	ref		0	99	ref		0.970874	103	ref		1.31579	152
supercont1.1094:186676	G	A	Substitution	AAEL014379	AAEL014379-RA	Other detox	adrenodoxin	SYNONYMOUS_CODING	1007	79	D>D		0.84198	0.90132	0.82301	-	-	-		1.11111	90	ref		0	84	ref		0	102	ref		0	77	ref		26.3158	95	ref		25.2525	99	A/G		45.8333	96	A/G		45.2055	146
supercont1.1094:186679	G	A	Substitution	AAEL014379	AAEL014379-RA	Other detox	adrenodoxin	SYNONYMOUS_CODING	1004	78	A>A		0.81735	0.88338	0.90359	-	-	-		0	83	ref		0	82	ref		0	97	ref		0	76	ref		3.40909	88	ref		0	97	ref		2.17391	92	ref		0	146
supercont1.1094:186703	A	T	Substitution	AAEL014379	AAEL014379-RA	Other detox	adrenodoxin	SYNONYMOUS_CODING	980	70	T>T		0.7715	0.90022	0.89775	-	-	-		0	85	ref		0	82	ref		0	102	ref		0	77	ref		21.5909	88	ref		25.2747	91	A/T		42.8571	91	A/T		40	145
supercont1.1094:186739	T	G	Substitution	AAEL014379	AAEL014379-RA	Other detox	adrenodoxin	SYNONYMOUS_CODING	944	58	G>G		0.81986	0.90391	0.89894	-	-	-		49.2308	65	G/T		50.5263	95	G/T		47.7778	90	G/T		98.2759	58	G		59.0909	66	G/T		60.7143	84	G/T		56.4706	85	G/T		56.391	133
supercont1.1094:186787	G	A	Substitution	AAEL014379	AAEL014379-RA	Other detox	adrenodoxin	SYNONYMOUS_CODING	896	42	G>G		0.88059	0.89293	0.86201	-	-	-		52.5	80	A/G		47.0588	68	A/G		57.1429	63	A/G		0	53	ref		15.942	69	ref		10.6667	75	A/G		0	63	ref		0	100
supercont1.1094:201792	C	T	Substitution	AAEL014379	AAEL014379-RA	Other detox	adrenodoxin	INTRONIC					0.83512	0.89522	0.89735	-	-	-		0	62	ref		0	54	ref		0	47	ref		51.0638	47	C/T		4.16667	48	ref		2	50	ref		11.1111	45	ref		9.58904	73
supercont1.1094:201929	G	T	Substitution	AAEL014379	AAEL014379-RA	Other detox	adrenodoxin	INTRONIC					0.88473	0.87253	0.88733	-	-	-		29.3103	58	ref		33.9286	56	G/T		27.6923	65	G/T		0	76	ref		0	49	ref		0	60	ref		0	49	ref		0	73
supercont1.1094:201937	C	T	Substitution	AAEL014379	AAEL014379-RA	Other detox	adrenodoxin	INTRONIC					0.85669	0.89447	0.89815	-	-	-		0	77	ref		0	70	ref		0	85	ref		0	88	ref		7.93651	63	ref		7.35294	68	ref		8.47458	59	ref		20.2381	84
supercont1.1094:201938	G	C	Substitution	AAEL014379	AAEL014379-RA	Other detox	adrenodoxin	INTRONIC					0.8537	0.88098	0.88592	-	-	-		34.5679	81	C/G		36.1111	72	C/G		34.1176	85	C/G		0	93	ref		0	64	ref		0	71	ref		0	62	ref		0	89
supercont1.1094:201941	T	A	Substitution	AAEL014379	AAEL014379-RA	Other detox	adrenodoxin	INTRONIC					0.87783	0.89621	0.89917	-	-	-		0	86	ref		0	74	ref		0	95	ref		0	96	ref		8.69565	69	ref		8	75	ref		14.2857	70	A/T		26.5306	98
supercont1.1094:201960	A	C	Substitution	AAEL014379	AAEL014379-RA	Other detox	adrenodoxin	INTRONIC					0.85521	0.8941	0.87006	-	-	-		0	119	ref		0	93	ref		0	120	ref		0.862069	116	ref		13.8298	94	ref		10.5769	104	A/C		1.05263	95	ref		0	140
supercont1.1094:202000	G	A	Substitution	AAEL014379	AAEL014379-RA	Other detox	adrenodoxin	INTRONIC					0.88707	0.9005	0.90148	-	-	-		0.793651	126	ref		0	130	ref		0	133	ref		0	127	ref		0.934579	107	ref		3.4188	117	ref		13.3333	120	A/G		15.7303	178
supercont1.1094:202009	C	T	Substitution	AAEL014379	AAEL014379-RA	Other detox	adrenodoxin	INTRONIC					0.88214	0.89564	0.90414	-	-	-		0	131	ref		0	131	ref		0	116	ref		0	119	ref		3.22581	93	ref		0	114	ref		0	120	ref		0	186
supercont1.1094:202013	CTA	C	Deletion	AAEL014379	AAEL014379-RA	Other detox	adrenodoxin	INTRONIC					na	na	na	-	na	-		0	122	ref		0	123	ref		0	111	ref		0	120	ref		18.8889	90	ref		20.1835	109	C/CTA		34.7826	115	C/CTA		33.8798	183
supercont1.1094:202058	A	AT	Insertion	AAEL014379	AAEL014379-RA	Other detox	adrenodoxin	INTRONIC					na	na	na	-	na	-		62.069	87	A/AT		50	80	A/AT		65.7143	70	A/AT		0	94	ref		0	68	ref		0	92	ref		0	100	ref		0	148
supercont1.1094:202080	A	G	Substitution	AAEL014379	AAEL014379-RA	Other detox	adrenodoxin	INTRONIC					0.83034	0.85783	0.89364	-	-	-		78.6885	61	G		77.551	49	A/G		96	50	G		100	88	G		98.3051	59	G		100	79	G		100	67	G		100	109
supercont1.110:1346531	C	A	Substitution	AAEL004222	AAEL004222-RA	Ion channel	voltage-dependent p/q type calcium channel	SYNONYMOUS_CODING	5715	1905	S>S		0.81146	0.87779	0.8772	-	-	-		8.16327	49	ref		7.89474	38	ref		17.6471	51	A/C		0	62	ref		0	50	ref		0	56	ref		0	54	ref		0	91
supercont1.110:1346537	G	A	Substitution	AAEL004222	AAEL004222-RA	Ion channel	voltage-dependent p/q type calcium channel	SYNONYMOUS_CODING	5709	1903	S>S		0.8878	0.8985	0.88349	-	-	-		85.7143	49	A		67.5	40	A/G		77.551	49	A/G		0	58	ref		31.9149	47	ref		13.7931	58	A/G		5.35714	56	ref		17.6471	85
supercont1.110:1346543	G	A	Substitution	AAEL004222	AAEL004222-RA	Ion channel	voltage-dependent p/q type calcium channel	SYNONYMOUS_CODING	5703	1901	I>I		0.89122	0.87055	0.89621	-	-	-		0	50	ref		10	40	ref		8	50	ref		0	51	ref		0	39	ref		0	60	ref		0	55	ref		0	86
supercont1.110:1354411	T	C	Substitution	AAEL004222	AAEL004222-RA	Ion channel	voltage-dependent p/q type calcium channel	INTRONIC					0.87783	0.88968	0.89556	Cayn	-	-		84.375	32	C		79.4872	39	C/T		63.4146	41	C/T		32.8767	73	C/T		97.2973	37	C		91.6667	36	C/T		54	50	C/T		53.75	80
supercont1.110:1354443	C	A	Substitution	AAEL004222	AAEL004222-RA	Ion channel	voltage-dependent p/q type calcium channel	SYNONYMOUS_CODING	5307	1769	R>R		0.86959	0.87379	0.89315	-	-	-		0	57	ref		1.31579	76	ref		12	75	A/C		1	100	ref		0	62	ref		0	70	ref		0	71	ref		0	130
supercont1.110:1354476	T	C	Substitution	AAEL004222	AAEL004222-RA	Ion channel	voltage-dependent p/q type calcium channel	SYNONYMOUS_CODING	5274	1758	L>L		0.86959	0.89919	0.86124	-	-	-		37.3333	75	C/T		40.2062	97	C/T		31.068	103	C/T		0	114	ref		27.907	86	ref		14.5833	96	C/T		13.7931	87	C/T		17.7419	124
supercont1.110:1354557	G	A	Substitution	AAEL004222	AAEL004222-RA	Ion channel	voltage-dependent p/q type calcium channel	SYNONYMOUS_CODING	5193	1731	I>I		0.85953	0.90338	0.88391	-	-	-		30.4348	69	ref		37.7049	61	A/G		33.8462	65	A/G		0	100	ref		31.25	80	A/G		12.6582	79	A/G		9.33333	75	ref		15.3846	104
supercont1.110:1354582	A	G	Substitution	AAEL004222	AAEL004222-RA	Ion channel	voltage-dependent p/q type calcium channel	INTRONIC					0.70411	0.89786	0.89917	-	-	-		100	63	G		100	50	G		100	51	G		50	80	A/G		95.3846	65	G		95.7143	70	G		78.7879	66	A/G		79.7872	94
supercont1.110:1354593	T	A	Substitution	AAEL004222	AAEL004222-RA	Ion channel	voltage-dependent p/q type calcium channel	INTRONIC					0.8834	0.88375	0.88257	-	-	-		31.25	64	ref		19.6078	51	A/T		15.7895	57	A/T		0	78	ref		0	60	ref		0	68	ref		0	64	ref		0	87
supercont1.110:1354635	C	A	Substitution	AAEL004222	AAEL004222-RA	Ion channel	voltage-dependent p/q type calcium channel	SPLICE_SITE					0.89564	0.88375	0.89081	-	-	-		26.087	46	ref		10.8696	46	ref		18.75	48	A/C		0	55	ref		0	46	ref		0	52	ref		0	49	ref		0	64
supercont1.110:1354656	C	A	Substitution	AAEL004222	AAEL004222-RA	Ion channel	voltage-dependent p/q type calcium channel	SYNONYMOUS_CODING	5160	1720	R>R		0.88635	0.89251	0.89042	-	-	-		35	40	ref		42.5	40	A/C		28.9474	38	A/C		2	50	ref		27.7778	36	ref		15.5556	45	A/C		12.1951	41	A/C		1.85185	54
supercont1.110:1357174	C	A	Substitution	AAEL004222	AAEL004222-RA	Ion channel	voltage-dependent p/q type calcium channel	SYNONYMOUS_CODING	4899	1633	V>V		0.86559	0.89196	0.90305	-	-	-		0	70	ref		0	94	ref		0	79	ref		0	74	ref		9.375	64	ref		15.2778	72	A/C		4.34783	92	ref		6.15385	130
supercont1.110:1357250	C	A	Substitution	AAEL004222	AAEL004222-RA	Ion channel	voltage-dependent p/q type calcium channel	SPLICE_SITE					0.88609	0.86853	0.89467	-	-	-		0	76	ref		5	60	ref		6.0241	83	ref		0	83	ref		0	85	ref		0	64	ref		0	84	ref		0	138
supercont1.110:1357281	G	A	Substitution	AAEL004222	AAEL004222-RA	Ion channel	voltage-dependent p/q type calcium channel	INTRONIC					0.88799	0.86029	0.89656	-	-	-		0	76	ref		10.6667	75	A/G		4.61538	65	ref		0	83	ref		0	64	ref		0	61	ref		0	86	ref		0	129
supercont1.110:1357288	CT	C	Deletion	AAEL004222	AAEL004222-RA	Ion channel	voltage-dependent p/q type calcium channel	INTRONIC					na	na	na	-	na	-		0	78	C		10.6667	75	C/CC		4.7619	63	C		0	78	C/T		0	61	C/T		0	60	C/T		0	81	C/T		0	130
supercont1.110:1357289	T	C	Substitution	AAEL004222	AAEL004222-RA	Ion channel	voltage-dependent p/q type calcium channel	INTRONIC					0.81986	0.82847	0.89431	-	-	-		100	78	C		89.3333	75	C/CC		95.2381	63	C		57.6923	78	C/T		44.2623	61	C/T		33.3333	60	C/T		33.3333	81	C/T		33.0769	130
supercont1.110:1357293	A	C	Substitution	AAEL004222	AAEL004222-RA	Ion channel	voltage-dependent p/q type calcium channel	INTRONIC					0.89198	0.87186	0.89667	-	-	-		0	72	ref		12.6582	79	A/C		4.41176	68	ref		0	72	ref		0	62	ref		0	60	ref		0	84	ref		0	129
supercont1.110:1357336	G	A	Substitution	AAEL004222	AAEL004222-RA	Ion channel	voltage-dependent p/q type calcium channel	SYNONYMOUS_CODING	4821	1607	S>S		0.81458	0.89981	0.90094	-	-	-		100	63	A		80.8824	68	A/G		90	80	A/G		50.5747	87	A/G		95.6522	46	A		96.0784	51	A		76.3158	76	A/G		73.3945	109
supercont1.110:1357342	T	C	Substitution	AAEL004222	AAEL004222-RA	Ion channel	voltage-dependent p/q type calcium channel	SYNONYMOUS_CODING	4815	1605	S>S		0.88726	0.87826	0.88825	-	-	-		49.1228	57	C/T		34.375	64	C/T		51.3158	76	C/T		0	85	ref		68.0851	47	C/T		75	56	C/T		50.6493	77	C/T		45.9459	111
supercont1.110:1357354	G	T	Substitution	AAEL004222	AAEL004222-RA	Ion channel	voltage-dependent p/q type calcium channel	SYNONYMOUS_CODING	4803	1601	A>A		0.88906	0.90176	0.9002	-	-	-		22.2222	63	ref		13.0435	69	G/T		5.88235	85	ref		0	86	ref		21.2766	47	ref		12.2807	57	G/T		8.57143	70	ref		9.01639	122
supercont1.110:1357372	A	G	Substitution	AAEL004222	AAEL004222-RA	Ion channel	voltage-dependent p/q type calcium channel	SYNONYMOUS_CODING	4785	1595	G>G		0.82275	0.90478	0.89645	-	-	-		100	87	G		83.0986	71	A/G		85.8974	78	A/G		45.6522	92	A/G		95.2381	63	G		91.1765	68	A/G		74.0741	81	A/G		71.9424	139
supercont1.110:1357402	T	G	Substitution	AAEL004222	AAEL004222-RA	Ion channel	voltage-dependent p/q type calcium channel	SYNONYMOUS_CODING	4755	1585	A>A		0.74245	0.90369	0.90148	Cayn	-	-		100	95	G		98.8764	89	G		100	133	G		53.7815	119	G/T		97.4359	78	G		90.2174	92	G/T		75	108	G/T		73.9796	196
supercont1.110:1357414	C	T	Substitution	AAEL004222	AAEL004222-RA	Ion channel	voltage-dependent p/q type calcium channel	SYNONYMOUS_CODING	4743	1581	E>E		0.88635	0.88758	0.86694	-	-	-		24.3902	123	ref		15.1515	99	C/T		18.9542	153	C/T		0	133	ref		0	103	ref		0	107	ref		0	117	ref		0	223
supercont1.110:1357426	T	G	Substitution	AAEL004222	AAEL004222-RA	Ion channel	voltage-dependent p/q type calcium channel	SYNONYMOUS_CODING	4731	1577	R>R		0.8789	0.89043	0.90325	-	-	-		0	124	ref		0	114	ref		0	163	ref		0	146	ref		11	100	ref		11.215	107	G/T		6.34921	126	ref		10.8696	230
supercont1.110:1357444	C	T	Substitution	AAEL004222	AAEL004222-RA	Ion channel	voltage-dependent p/q type calcium channel	SYNONYMOUS_CODING	4713	1571	A>A		0.87488	0.90481	0.88305	-	-	-		0	130	ref		0	138	ref		0	185	ref		0	169	ref		28	100	ref		42.2535	142	C/T		28.0822	146	C/T		30.0781	256
supercont1.110:1357471	A	G	Substitution	AAEL004222	AAEL004222-RA	Ion channel	voltage-dependent p/q type calcium channel	SYNONYMOUS_CODING	4686	1562	N>N		0.85238	0.90109	0.87478	-	-	-		0	164	ref		0	164	ref		0	191	ref		0	192	ref		28.777	139	A/G		37.4269	171	A/G		35.2201	159	A/G		32.7703	296
supercont1.110:1357477	C	T	Substitution	AAEL004222	AAEL004222-RA	Ion channel	voltage-dependent p/q type calcium channel	SYNONYMOUS_CODING	4680	1560	R>R		0.85521	0.89685	0.85952	-	-	-		0	170	ref		0	164	ref		0	194	ref		0	199	ref		35.461	141	C/T		36.8421	171	C/T		35.9281	167	C/T		32.9932	294
supercont1.110:1357489	C	G	Substitution	AAEL004222	AAEL004222-RA	Ion channel	voltage-dependent p/q type calcium channel	SYNONYMOUS_CODING	4668	1556	L>L		0.88473	0.88737	0.85781	-	-	-		18.9944	179	ref		12.973	185	C/G		16.6667	198	C/G		0	203	ref		0	158	ref		0	191	ref		0	175	ref		0	301
supercont1.110:1357516	C	T	Substitution	AAEL004222	AAEL004222-RA	Ion channel	voltage-dependent p/q type calcium channel	SYNONYMOUS_CODING	4641	1547	G>G		0.89243	0.88141	0.90207	-	-	-		0	207	ref		8.4507	213	C/T		11.4035	228	C/T		0.483092	207	ref		0	178	ref		0	210	ref		0	201	ref		0	311
supercont1.110:1357561	T	C	Substitution	AAEL004222	AAEL004222-RA	Ion channel	voltage-dependent p/q type calcium channel	SYNONYMOUS_CODING	4596	1532	L>L		0.87978	0.80146	0.90286	-	-	-		59.5855	193	C/T		52.1053	190	C/T		55.7214	201	C/T		47.0899	189	C/T		68.1319	182	C/T		65.9218	179	C/T		64.9123	171	C/T		57.6389	288
supercont1.110:1357591	G	C	Substitution	AAEL004222	AAEL004222-RA	Ion channel	voltage-dependent p/q type calcium channel	SYNONYMOUS_CODING	4566	1522	P>P		0.8842	0.79489	0.90075	-	-	-		60.7843	153	C/G		53.6424	151	C/G		57.5163	153	C/G		49.0196	153	C/G		68.2927	164	C/G		69.7842	139	C/G		62	150	C/G		59.292	226
supercont1.110:1357597	A	G	Substitution	AAEL004222	AAEL004222-RA	Ion channel	voltage-dependent p/q type calcium channel	SYNONYMOUS_CODING	4560	1520	I>I		0.88059	0.88098	0.86853	-	-	-		17.1233	146	ref		10.2941	136	A/G		10.0671	149	A/G		0	141	ref		0	150	ref		0	135	ref		0	146	ref		0	231
supercont1.110:1357672	G	C	Substitution	AAEL004222	AAEL004222-RA	Ion channel	voltage-dependent p/q type calcium channel	INTRONIC					0.88978	0.8344	0.89815	-	-	-		36.8421	95	C/G		18.3333	120	C/G		11.6071	112	C/G		0	112	ref		0	127	ref		0	100	ref		0	110	ref		0	155
supercont1.110:1357677	C	T	Substitution	AAEL004222	AAEL004222-RA	Ion channel	voltage-dependent p/q type calcium channel	INTRONIC					0.88815	0.90282	0.87478	-	-	-		40.2062	97	C/T		53.4483	116	overlap		51.9231	104	overlap		0	121	ref		26.3566	129	ref		21.9298	114	C/T		17.2414	116	C/T		15.4839	155
supercont1.110:1357682	G	C	Substitution	AAEL004222	AAEL004222-RA	Ion channel	voltage-dependent p/q type calcium channel	INTRONIC					0.83272	0.85713	0.88733	-	-	-		16.8317	101	ref		14.7826	115	C/G		12.6316	95	C/G		0	120	ref		0	124	ref		0	115	ref		0	110	ref		0	149
supercont1.110:1357685	G	C	Substitution	AAEL004222	AAEL004222-RA	Ion channel	voltage-dependent p/q type calcium channel	INTRONIC					0.81458	0.89001	0.8654	-	-	-		17.1429	105	ref		14.1593	113	C/G		10.8696	92	C/G		0	114	ref		0	116	ref		0	115	ref		0	112	ref		0	151
supercont1.110:1357694	G	A	Substitution	AAEL004222	AAEL004222-RA	Ion channel	voltage-dependent p/q type calcium channel	INTRONIC					0.82791	0.86633	0.8557	-	-	-		15.534	103	ref		7.75862	116	ref		10.5263	95	A/G		40.1786	112	A/G		8.03571	112	ref		18.018	111	A/G		17.4312	109	A/G		19.7531	162
supercont1.110:1357696	C	T	Substitution	AAEL004222	AAEL004222-RA	Ion channel	voltage-dependent p/q type calcium channel	INTRONIC					0.65376	0.88568	0.87006	-	-	-		7.14286	112	ref		8.77193	114	C/T		3.9604	101	ref		0	111	ref		0	108	ref		0	110	ref		0	115	ref		0	162
supercont1.110:1357734	T	C	Substitution	AAEL004222	AAEL004222-RA	Ion channel	voltage-dependent p/q type calcium channel	SYNONYMOUS_CODING	4479	1493	R>R		0.87419	0.90414	0.88056	Phet	-	-		100	132	C		100	106	C		100	113	C		59.4059	101	C/T		99.1453	117	C		97.2222	108	C		82.1138	123	C/T		81.0651	169
supercont1.110:1357751	G	A	Substitution	AAEL004222	AAEL004222-RA	Ion channel	voltage-dependent p/q type calcium channel	SYNONYMOUS_CODING	4462	1488	L>L		0.88589	0.90022	0.88667	-	-	-		39.0411	146	A/G		52.381	105	A/G		40.6504	123	A/G		0	91	ref		31.8966	116	A/G		22.1311	122	A/G		14.8148	135	A/G		17.2775	191
supercont1.110:1357773	C	T	Substitution	AAEL004222	AAEL004222-RA	Ion channel	voltage-dependent p/q type calcium channel	SYNONYMOUS_CODING	4440	1480	G>G		0.89306	0.87675	0.89765	-	-	-		0	139	ref		12.381	105	C/T		5.10949	137	ref		0	122	ref		0	116	ref		0	129	ref		0	143	ref		0	183
supercont1.110:1357806	T	C	Substitution	AAEL004222	AAEL004222-RA	Ion channel	voltage-dependent p/q type calcium channel	SYNONYMOUS_CODING	4407	1469	L>L		0.86207	0.85783	0.89387	-	-	-		17.6991	113	ref		11.215	107	C/T		21.3235	136	C/T		0	106	ref		0	95	ref		0	129	ref		0	138	ref		0	178
supercont1.110:1357818	C	T	Substitution	AAEL004222	AAEL004222-RA	Ion channel	voltage-dependent p/q type calcium channel	SYNONYMOUS_CODING	4395	1465	A>A		0.88921	0.87055	0.89589	-	-	-		0	111	ref		13.7615	109	C/T		8.46154	130	C/T		0	101	ref		0	91	ref		0	108	ref		0	134	ref		0	166
supercont1.110:1357922	A	G	Substitution	AAEL004222	AAEL004222-RA	Ion channel	voltage-dependent p/q type calcium channel	INTRONIC					0.88878	0.84353	0.88349	-	-	-		0	136	ref		0	122	ref		0	103	ref		15.748	127	ref		42.8571	105	A/G		50.8197	122	A/G		29.771	131	A/G		41.9192	198
supercont1.110:1357924	A	T	Substitution	AAEL004222	AAEL004222-RA	Ion channel	voltage-dependent p/q type calcium channel	INTRONIC					0.8767	0.89931	0.85952	-	-	-		0	136	ref		0	125	ref		0	100	ref		0	129	ref		41.8182	110	A/T		50	122	A/T		27.0677	133	A/T		41	200
supercont1.110:1357927	G	A	Substitution	AAEL004222	AAEL004222-RA	Ion channel	voltage-dependent p/q type calcium channel	INTRONIC					0.8537	0.89738	0.88933	-	-	-		44.4444	135	A/G		41.8033	122	A/G		43.0108	93	A/G		0	129	ref		32.3529	102	A/G		22.314	121	A/G		13.6364	132	A/G		13.2353	204
supercont1.110:1357929	G	A	Substitution	AAEL004222	AAEL004222-RA	Ion channel	voltage-dependent p/q type calcium channel	INTRONIC					0.87936	0.86562	0.84871	-	-	-		8.52713	129	ref		4.8	125	ref		8.51064	94	ref		0	119	ref		0	104	ref		0	124	ref		0.78125	128	ref		0	203
supercont1.110:1357939	A	G	Substitution	AAEL004222	AAEL004222-RA	Ion channel	voltage-dependent p/q type calcium channel	INTRONIC					0.7715	0.85783	0.86779	-	-	-		18.254	126	ref		16.5289	121	A/G		20.202	99	A/G		0	122	ref		0	106	ref		0	115	ref		0	123	ref		0	201
supercont1.110:1357943	G	C	Substitution	AAEL004222	AAEL004222-RA	Ion channel	voltage-dependent p/q type calcium channel	INTRONIC					0.8789	0.90282	0.87478	-	-	-		42.7273	110	C/G		42.1053	114	C/G		40.5941	101	C/G		0	116	ref		29.4118	102	C/G		22.1239	113	C/G		11.8644	118	C/G		13.4328	201
supercont1.110:1357945	C	T	Substitution	AAEL004222	AAEL004222-RA	Ion channel	voltage-dependent p/q type calcium channel	INTRONIC					0.66083	0.84983	0.86853	-	-	-		16.6667	108	ref		17.2414	116	C/T		20.1923	104	C/T		0	122	ref		0	103	ref		0	113	ref		0	119	ref		0	199
supercont1.110:1357954	T	C	Substitution	AAEL004222	AAEL004222-RA	Ion channel	voltage-dependent p/q type calcium channel	INTRONIC					0.82791	0.88841	0.88552	-	-	-		20.354	113	ref		17.2414	116	C/T		18.6274	102	C/T		0	123	ref		0	105	ref		0	110	ref		0	115	ref		0.529101	189
supercont1.110:1358032	G	T	Substitution	AAEL004222	AAEL004222-RA	Ion channel	voltage-dependent p/q type calcium channel	SYNONYMOUS_CODING	4236	1412	S>S		0.88101	0.85593	0.88349	-	-	-		16.129	93	ref		8.77193	114	G/T		20.7317	82	G/T		0	113	ref		0	92	ref		0	112	ref		0	111	ref		0	169
supercont1.110:1358100	T	A	Substitution	AAEL004222	AAEL004222-RA	Ion channel	voltage-dependent p/q type calcium channel	INTRONIC					0.81986	0.90282	0.88958	Cayn; Nakh	-	-		100	47	A		100	55	A		100	35	A		40.9091	88	A/T		98.0769	52	A		89.6552	58	A/T		75.3247	77	A/T		76.1468	109
supercont1.110:1358180	G	A	Substitution	AAEL004222	AAEL004222-RA	Ion channel	voltage-dependent p/q type calcium channel	SYNONYMOUS_CODING	4155	1385	F>F		0.88308	0.87675	0.85494	-	-	-		18	50	ref		8.69565	46	ref		20.4082	49	A/G		0	64	ref		0	59	ref		0	76	ref		0	80	ref		0	127
supercont1.110:1358183	G	A	Substitution	AAEL004222	AAEL004222-RA	Ion channel	voltage-dependent p/q type calcium channel	SYNONYMOUS_CODING	4152	1384	S>S		0.85238	0.89196	0.87944	-	-	-		32	50	ref		37.037	54	A/G		38.4615	52	A/G		0	70	ref		10.1695	59	ref		10.3896	77	ref		8.43374	83	ref		8.95522	134
supercont1.110:1358186	T	C	Substitution	AAEL004222	AAEL004222-RA	Ion channel	voltage-dependent p/q type calcium channel	SYNONYMOUS_CODING	4149	1383	V>V		0.87199	0.89866	0.86779	-	-	-		35.8491	53	C/T		37.5	56	C/T		37.931	58	C/T		0	74	ref		12.2807	57	ref		10.5263	76	ref		8.33333	84	ref		9.92908	141
supercont1.110:1358207	T	G	Substitution	AAEL004222	AAEL004222-RA	Ion channel	voltage-dependent p/q type calcium channel	SYNONYMOUS_CODING	4128	1376	T>T		0.83763	0.87186	0.88667	-	-	-		14.6667	75	ref		11.2676	71	G/T		20.6897	87	G/T		0	81	ref		0	78	ref		0	82	ref		0	96	ref		0	148
supercont1.110:1358219	A	T	Substitution	AAEL004222	AAEL004222-RA	Ion channel	voltage-dependent p/q type calcium channel	SYNONYMOUS_CODING	4116	1372	T>T		0.88743	0.9045	0.89387	-	-	-		79.7297	74	T		74.6667	75	A/T		63.0631	111	A/T		14	100	ref		80	80	T		78.4946	93	A/T		48.5149	101	A/T		62.3377	154
supercont1.110:1358228	C	T	Substitution	AAEL004222	AAEL004222-RA	Ion channel	voltage-dependent p/q type calcium channel	SYNONYMOUS_CODING	4107	1369	P>P		0.83763	0.89212	0.88439	-	-	-		22.5	80	ref		22.2222	81	C/T		11.3821	123	C/T		0	91	ref		7.05882	85	ref		8.24742	97	ref		8.33333	108	ref		6.66667	150
supercont1.110:1358258	T	C	Substitution	AAEL004222	AAEL004222-RA	Ion channel	voltage-dependent p/q type calcium channel	SYNONYMOUS_CODING	4077	1359	G>G		0.88762	0.85173	0.89905	-	-	-		7.14286	70	ref		1.26582	79	ref		2.63158	114	ref		0	91	ref		0	68	ref		0	95	ref		0	94	ref		0	138
supercont1.110:1358279	G	A	Substitution	AAEL004222	AAEL004222-RA	Ion channel	voltage-dependent p/q type calcium channel	SYNONYMOUS_CODING	4056	1352	I>I		0.87488	0.87555	0.8457	-	-	-		0	68	ref		3.0303	66	ref		11.4583	96	A/G		0	87	ref		0	65	ref		0	89	ref		0	90	ref		0	127
supercont1.110:1358312	A	G	Substitution	AAEL004222	AAEL004222-RA	Ion channel	voltage-dependent p/q type calcium channel	SPLICE_SITE					0.79693	0.90282	0.8942	Cayn	-	-		100	37	G		100	48	G		100	61	G		41.3793	58	A/G		95.8333	48	G		89.6552	58	A/G		67.1428	70	A/G		72.7273	88
supercont1.110:1358321	C	T	Substitution	AAEL004222	AAEL004222-RA	Ion channel	voltage-dependent p/q type calcium channel	INTRONIC					0.65376	0.90414	0.88766	-	-	-		100	31	T		100	34	T		100	55	T		42.2222	45	C/T		92.8571	42	T		88.6792	53	C/T		60.3448	58	C/T		66.2338	77
supercont1.110:1365523	T	C	Substitution	AAEL004222	AAEL004222-RA	Ion channel	voltage-dependent p/q type calcium channel	INTRONIC					0.85813	0.89674	0.89631	-	-	-		7.69231	65	ref		6.25	48	ref		4.54545	44	ref		0	62	ref		9.80392	51	ref		2.5641	39	ref		2	50	ref		3.52941	85
supercont1.110:1365576	C	A	Substitution	AAEL004222	AAEL004222-RA	Ion channel	voltage-dependent p/q type calcium channel	SYNONYMOUS_CODING	3903	1301	L>L		0.87419	0.79558	0.88477	-	-	-		34.1772	79	A/C		44.3182	88	A/C		37.3494	83	A/C		37.2093	86	A/C		42.8571	84	A/C		31.8681	91	A/C		31.9444	72	A/C		29.6875	128
supercont1.110:1365660	T	C	Substitution	AAEL004222	AAEL004222-RA	Ion channel	voltage-dependent p/q type calcium channel	SYNONYMOUS_CODING	3819	1273	Q>Q		0.87838	0.89893	0.86201	-	-	-		0	104	ref		0	123	ref		0	119	ref		0	138	ref		42.3913	92	C/T		42.3423	111	C/T		32.2581	124	C/T		35.3774	212
supercont1.110:1365675	G	A	Substitution	AAEL004222	AAEL004222-RA	Ion channel	voltage-dependent p/q type calcium channel	SYNONYMOUS_CODING	3804	1268	I>I		0.85521	0.89957	0.6239	-	-	-		2.0202	99	ref		7.14286	126	ref		9.56522	115	A/G		0	124	ref		38.4615	104	A/G		43.3333	120	A/G		35.6522	115	A/G		39.7849	186
supercont1.110:1365734	T	A	Substitution	AAEL004222	AAEL004222-RA	Ion channel	voltage-dependent p/q type calcium channel	SPLICE_SITE					0.82791	0.90391	0.90464	Nakh	-	-		100	83	A		100	90	A		100	66	A		58.6207	87	A/T		95.8333	72	A		96.8421	95	A		76.3889	72	A/T		78.6885	122
supercont1.110:1365751	A	G	Substitution	AAEL004222	AAEL004222-RA	Ion channel	voltage-dependent p/q type calcium channel	INTRONIC					0.86207	0.89487	0.90497	Nakh	-	-		2.8169	71	ref		1.2987	77	ref		3.0303	66	ref		0	65	ref		11.6667	60	ref		11.3924	79	A/G		8.47458	59	ref		7.20721	111
supercont1.110:1365771	T	C	Substitution	AAEL004222	AAEL004222-RA	Ion channel	voltage-dependent p/q type calcium channel	INTRONIC					0.8537	0.89866	0.8917	-	-	-		0	70	ref		0	69	ref		0	55	ref		4.91803	61	ref		42.623	61	C/T		38.6667	75	C/T		30.6122	49	C/T		32.967	91
supercont1.110:1365776	C	T	Substitution	AAEL004222	AAEL004222-RA	Ion channel	voltage-dependent p/q type calcium channel	INTRONIC					0.87783	0.86494	0.89535	-	-	-		2.98507	67	ref		1.53846	65	ref		5.76923	52	ref		0	50	ref		0	58	ref		0	71	ref		0	45	ref		0	84
supercont1.110:1365807	A	G	Substitution	AAEL004222	AAEL004222-RA	Ion channel	voltage-dependent p/q type calcium channel	SYNONYMOUS_CODING	3739	1247	L>L		0.87274	0.90331	0.86454	Cayn	-	-		3.7037	54	ref		3.84615	52	ref		11.3208	53	A/G		4.7619	42	ref		52.2727	44	A/G		36.5385	52	A/G		27.027	37	A/G		32.1429	56
supercont1.110:1366067	A	T	Substitution	AAEL004222	AAEL004222-RA	Ion channel	voltage-dependent p/q type calcium channel	INTRONIC					0.89044	0.90271	0.88667	-	-	-		37.1429	35	ref		48.9796	49	A/T		41.6667	48	A/T		0	35	ref		29.7297	37	ref		19.5122	41	A/T		12.5	40	A/T		25.9259	54
supercont1.110:1366071	T	C	Substitution	AAEL004222	AAEL004222-RA	Ion channel	voltage-dependent p/q type calcium channel	INTRONIC					0.84769	0.89839	0.89301	-	-	-		25.641	39	ref		25.4902	51	C/T		16	50	C/T		12.5	32	ref		54.8387	31	C/T		51.1628	43	C/T		34.1463	41	C/T		35.7143	56
supercont1.110:1366077	G	A	Substitution	AAEL004222	AAEL004222-RA	Ion channel	voltage-dependent p/q type calcium channel	INTRONIC					0.80817	0.89535	0.88766	Cayn	-	-		0	41	ref		0	53	ref		0	47	ref		0	38	ref		43.1818	44	A/G		30.6122	49	A/G		32.5581	43	A/G		29.8507	67
supercont1.110:1366185	G	A	Substitution	AAEL004222	AAEL004222-RA	Ion channel	voltage-dependent p/q type calcium channel	SYNONYMOUS_CODING	3510	1170	F>F		0.89147	0.87253	0.89453	-	-	-		0	80	ref		14.6789	109	A/G		6.54206	107	ref		0	91	ref		0	98	ref		0	100	ref		0	90	ref		0	141
supercont1.110:1366266	T	C	Substitution	AAEL004222	AAEL004222-RA	Ion channel	voltage-dependent p/q type calcium channel	SYNONYMOUS_CODING	3429	1143	L>L		0.84588	0.89017	0.90512	-	-	-		19.7917	96	ref		23.9669	121	C/T		14.7368	95	C/T		8.49057	106	ref		33.7349	83	C/T		38.5321	109	C/T		46.6019	103	C/T		30.3226	155
supercont1.110:1366268	G	A	Substitution	AAEL004222	AAEL004222-RA	Ion channel	voltage-dependent p/q type calcium channel	SYNONYMOUS_CODING	3427	1143	L>L		0.8492	0.88687	0.90136	-	-	-		2.27273	88	ref		1.68067	119	ref		1.03093	97	ref		0	103	ref		0	77	ref		0	107	ref		3.80952	105	ref		0.653595	153
supercont1.110:1366275	C	T	Substitution	AAEL004222	AAEL004222-RA	Ion channel	voltage-dependent p/q type calcium channel	SYNONYMOUS_CODING	3420	1140	A>A		0.84769	0.8862	0.90167	-	-	-		20	80	ref		22.549	102	C/T		14.7727	88	C/T		8.51064	94	ref		26.087	69	ref		33.6634	101	C/T		43.299	97	C/T		29.6552	145
supercont1.110:1366318	A	G	Substitution	AAEL004222	AAEL004222-RA	Ion channel	voltage-dependent p/q type calcium channel	INTRONIC					0.85087	0.88595	0.89218	-	-	-		0	67	ref		0	94	ref		0	82	ref		0	69	ref		0	53	ref		0	60	ref		0	63	ref		0	89
supercont1.110:1366320	G	A	Substitution	AAEL004222	AAEL004222-RA	Ion channel	voltage-dependent p/q type calcium channel	INTRONIC					0.8869	0.87675	0.80427	-	-	-		0	67	ref		0	92	ref		0	81	ref		0	68	ref		0	53	ref		0	60	ref		0	63	ref		0	85
supercont1.110:1366335	C	A	Substitution	AAEL004222	AAEL004222-RA	Ion channel	voltage-dependent p/q type calcium channel	INTRONIC					0.89773	0.33633	0.9002	Cayn	-	-		36.7089	79	A/C		64.7059	85	A/C		44.1558	77	A/C		0	68	ref		85.1852	54	A		72.2222	54	A/C		36.6667	60	A/C		38.961	77
supercont1.110:1366353	T	G	Substitution	AAEL004222	AAEL004222-RA	Ion channel	voltage-dependent p/q type calcium channel	INTRONIC					0.86083	0.79622	0.89248	-	-	-		5.12821	78	ref		4.25532	94	ref		0	72	ref		2.89855	69	ref		11.6667	60	ref		11.3208	53	G/T		6.77966	59	ref		4.49438	89
supercont1.110:1366357	T	A	Substitution	AAEL004222	AAEL004222-RA	Ion channel	voltage-dependent p/q type calcium channel	INTRONIC					0.88609	0.87253	0.85878	-	-	-		6.75676	74	ref		2.04082	98	ref		3.79747	79	ref		0	71	ref		0	61	ref		0	55	ref		0	62	ref		0	88
supercont1.110:1366360	C	A	Substitution	AAEL004222	AAEL004222-RA	Ion channel	voltage-dependent p/q type calcium channel	SPLICE_SITE					0.8885	0.89383	0.89743	-	-	-		59.2593	81	A/G		77.3196	97	A/G		73.6842	76	A/G		58.209	67	A/C		84.058	69	A		81.9672	61	A/C		64.5161	62	A/C		71.2644	87
supercont1.110:1366360	C	G	Substitution	AAEL004222	AAEL004222-RA	Ion channel	voltage-dependent p/q type calcium channel	SPLICE_SITE					0.8885	0.89383	0.89743	-	-	-		28.3951	81	A/G		16.4948	97	A/G		22.3684	76	A/G		0	67	diff		0	69	diff		0	61	diff		0	62	diff		0	87
supercont1.110:1366397	C	T	Substitution	AAEL004222	AAEL004222-RA	Ion channel	voltage-dependent p/q type calcium channel	SYNONYMOUS_CODING	3360	1120	E>E		0.80268	0.90109	0.90207	-	-	-		0	95	ref		0	82	ref		0	81	ref		0	72	ref		17.0455	88	ref		25.3012	83	C/T		5.61798	89	ref		10.8333	120
supercont1.110:1366472	A	G	Substitution	AAEL004222	AAEL004222-RA	Ion channel	voltage-dependent p/q type calcium channel	SYNONYMOUS_CODING	3285	1095	V>V		0.86207	0.82445	0.87079	-	-	-		14.5161	124	ref		18.2432	148	A/G		7.93651	126	ref		11.4286	105	ref		32.8467	137	A/G		32.7586	116	A/G		36.6412	131	A/G		31.8182	176
supercont1.110:1366505	A	T	Substitution	AAEL004222	AAEL004222-RA	Ion channel	voltage-dependent p/q type calcium channel	SYNONYMOUS_CODING	3252	1084	I>I		0.7715	0.84922	0.88113	-	-	-		3.81679	131	ref		5.76923	156	ref		3.7037	135	ref		0	103	ref		0	127	ref		0	132	ref		0	131	ref		0	199
supercont1.110:1366576	G	A	Substitution	AAEL004222	AAEL004222-RA	Ion channel	voltage-dependent p/q type calcium channel	SPLICE_SITE					0.83034	0.88475	0.7847	-	-	-		6.09756	82	ref		4.80769	104	ref		2.22222	90	ref		0	121	ref		0	98	ref		0	96	ref		0	97	ref		0	159
supercont1.110:1366584	T	A	Substitution	AAEL004222	AAEL004222-RA	Ion channel	voltage-dependent p/q type calcium channel	INTRONIC					0.85238	0.90097	0.90336	-	-	-		0	65	ref		0	96	ref		0	86	ref		0	101	ref		18.2927	82	ref		21.5909	88	A/T		5.37634	93	ref		10.9677	155
supercont1.110:1366604	C	G	Substitution	AAEL004222	AAEL004222-RA	Ion channel	voltage-dependent p/q type calcium channel	INTRONIC					0.86559	0.68302	0.89387	-	-	-		0	65	ref		0	90	ref		1.21951	82	ref		12.2951	122	ref		13.1579	76	ref		9.30232	86	ref		8.57143	70	ref		13.1387	137
supercont1.110:1366606	AC	A	Deletion	AAEL004222	AAEL004222-RA	Ion channel	voltage-dependent p/q type calcium channel	INTRONIC					na	na	na	-	na	-		0	62	ref		0	88	ref		0	75	ref		0	114	ref		9.45946	74	ref		6.09756	82	ref		7.24638	69	ref		10.3704	135
supercont1.110:1366628	T	A	Substitution	AAEL004222	AAEL004222-RA	Ion channel	voltage-dependent p/q type calcium channel	SPLICE_SITE					0.89032	0.85783	0.88933	-	-	-		22.2222	108	ref		8.84956	113	ref		7.14286	84	ref		0	120	ref		1.42857	70	ref		0	80	ref		0	80	ref		0.787402	127
supercont1.110:1366682	A	G	Substitution	AAEL004222	AAEL004222-RA	Ion channel	voltage-dependent p/q type calcium channel	SYNONYMOUS_CODING	3141	1047	T>T		0.89472	0.90242	0.8984	-	-	-		38.9474	95	A/G		14.2857	105	A/G		7.40741	108	ref		0	99	ref		39.3617	94	A/G		63.4409	93	A/G		39.4737	114	A/G		36.0248	161
supercont1.110:1366703	G	A	Substitution	AAEL004222	AAEL004222-RA	Ion channel	voltage-dependent p/q type calcium channel	SYNONYMOUS_CODING	3120	1040	F>F		0.89717	0.88226	0.86779	-	-	-		26.7857	56	ref		59.1549	71	A/G		61.2903	93	A/G		29.4737	95	A/G		42.5532	94	A/G		22.093	86	A/G		23.2323	99	A/G		21.3018	169
supercont1.110:1366724	T	A	Substitution	AAEL004222	AAEL004222-RA	Ion channel	voltage-dependent p/q type calcium channel	SYNONYMOUS_CODING	3099	1033	R>R		0.49688	0.50031	0.45227	-	-	-		81.0811	37	A		34.8837	43	A/C		29.5082	61	A/C		0	85	diff		1.35135	74	ref		1.38889	72	diff		1.0989	91	diff		2.11268	142
supercont1.110:1366724	T	C	Substitution	AAEL004222	AAEL004222-RA	Ion channel	voltage-dependent p/q type calcium channel	SYNONYMOUS_CODING	3099	1033	R>R		0.49688	0.50031	0.45227	-	-	-		18.9189	37	diff		65.1163	43	A/C		70.4918	61	A/C		35.2941	85	C/T		27.027	74	ref		20.8333	72	C/T		24.1758	91	C/T		16.1972	142
supercont1.110:1366730	C	T	Substitution	AAEL004222	AAEL004222-RA	Ion channel	voltage-dependent p/q type calcium channel	SYNONYMOUS_CODING	3093	1031	A>A		0.87041	0.87186	0.8821	-	-	-		13.3333	30	ref		11.7647	34	ref		15.0943	53	C/T		0	93	ref		0	74	ref		1.44928	69	ref		0	81	ref		0.694445	144
supercont1.110:1366865	A	G	Substitution	AAEL004222	AAEL004222-RA	Ion channel	voltage-dependent p/q type calcium channel	SYNONYMOUS_CODING	3018	1006	D>D		0.86858	0.88299	0.89502	-	-	-		10.4167	48	ref		8.51064	47	ref		11.5385	52	A/G		0	63	ref		0	62	ref		0	54	ref		0	74	ref		0	127
supercont1.110:1366883	G	A	Substitution	AAEL004222	AAEL004222-RA	Ion channel	voltage-dependent p/q type calcium channel	SYNONYMOUS_CODING	3000	1000	F>F		0.87613	0.88568	0.86201	-	-	-		19.4805	77	ref		14.2857	70	A/G		17.5	80	A/G		0	87	ref		0	91	ref		0	79	ref		0	94	ref		0	166
supercont1.110:1366895	G	A	Substitution	AAEL004222	AAEL004222-RA	Ion channel	voltage-dependent p/q type calcium channel	SYNONYMOUS_CODING	2988	996	F>F		0.8667	0.88643	0.89364	-	-	-		17.3469	98	ref		14.9425	87	A/G		4.30108	93	ref		5.37634	93	ref		0	116	ref		0	97	ref		0	112	ref		0	196
supercont1.110:1366910	A	T	Substitution	AAEL004222	AAEL004222-RA	Ion channel	voltage-dependent p/q type calcium channel	SYNONYMOUS_CODING	2973	991	I>I		0.83034	0.81902	0.89535	-	-	-		18.0952	105	ref		19.6078	102	A/T		8.8	125	ref		4.38596	114	ref		0.787402	127	ref		0.877193	114	ref		1.69492	118	ref		0	183
supercont1.110:1366916	G	A	Substitution	AAEL004222	AAEL004222-RA	Ion channel	voltage-dependent p/q type calcium channel	SYNONYMOUS_CODING	2967	989	A>A		0.77437	0.84133	0.90056	-	-	-		19.2661	109	ref		20.7207	111	A/G		9.77444	133	A/G		8.52713	129	ref		0.75188	133	ref		0.806452	124	ref		1.5748	127	ref		1.03093	194
supercont1.110:1366919	G	A	Substitution	AAEL004222	AAEL004222-RA	Ion channel	voltage-dependent p/q type calcium channel	SYNONYMOUS_CODING	2964	988	F>F		0.82791	0.74317	0.58068	Nakh	-	-		76.9912	113	A/G		79.3103	116	A/G		89.3939	132	A/G		46.4567	127	A/G		46.5649	131	A/G		47.6562	128	A/G		38.2353	136	A/G		38.6598	194
supercont1.110:1366937	A	G	Substitution	AAEL004222	AAEL004222-RA	Ion channel	voltage-dependent p/q type calcium channel	SYNONYMOUS_CODING	2946	982	I>I		0.88248	0.87186	0.89793	-	-	-		0	121	ref		2.27273	132	ref		6.79012	162	ref		0.671141	149	ref		0	145	ref		0	134	ref		0	141	ref		0	219
supercont1.110:1366943	C	T	Substitution	AAEL004222	AAEL004222-RA	Ion channel	voltage-dependent p/q type calcium channel	SYNONYMOUS_CODING	2940	980	V>V		0.82275	0.8955	0.90509	-	-	-		0	119	ref		0	136	ref		0	164	ref		0	157	ref		9.79021	143	ref		14.7059	136	C/T		1.41844	141	ref		9.29204	226
supercont1.110:1367036	G	A	Substitution	AAEL004222	AAEL004222-RA	Ion channel	voltage-dependent p/q type calcium channel	SYNONYMOUS_CODING	2847	949	R>R		0.81735	0.9036	0.8354	-	-	-		100	117	A		100	145	A		100	144	A		59.8361	122	A/G		97.6	125	A		96.3303	109	A		79.3333	150	A/G		82.7411	197
supercont1.110:1367174	G	A	Substitution	AAEL004222	AAEL004222-RA	Ion channel	voltage-dependent p/q type calcium channel	SYNONYMOUS_CODING	2709	903	Y>Y		0.87783	0.90199	0.70565	Nakh	-	-		24.1758	91	ref		24.1758	91	A/G		17.3469	98	A/G		1.63934	61	ref		37.9747	79	A/G		51.5152	66	A/G		35.3659	82	A/G		40.3226	124
supercont1.110:1367177	A	G	Substitution	AAEL004222	AAEL004222-RA	Ion channel	voltage-dependent p/q type calcium channel	SYNONYMOUS_CODING	2706	902	S>S		0.86959	0.9005	0.64106	Nakh	-	-		27.4725	91	ref		24.1758	91	A/G		16.6667	96	A/G		1.66667	60	ref		35.8209	67	A/G		52.3077	65	A/G		36.4865	74	A/G		41.4634	123
supercont1.110:1367180	G	A	Substitution	AAEL004222	AAEL004222-RA	Ion channel	voltage-dependent p/q type calcium channel	SYNONYMOUS_CODING	2703	901	G>G		0.87419	0.90251	0.75201	-	-	-		29.0698	86	ref		24.7191	89	A/G		17.0213	94	A/G		1.5873	63	ref		35.4839	62	A/G		51.6129	62	A/G		36	75	A/G		40.3361	119
supercont1.110:1367201	C	T	Substitution	AAEL004222	AAEL004222-RA	Ion channel	voltage-dependent p/q type calcium channel	SYNONYMOUS_CODING	2682	894	L>L		0.89443	0.88758	0.88909	-	-	-		25	96	ref		11.828	93	C/T		20	95	C/T		0	78	ref		0	84	ref		0	71	ref		0	88	ref		0	120
supercont1.110:1367234	A	G	Substitution	AAEL004222	AAEL004222-RA	Ion channel	voltage-dependent p/q type calcium channel	SYNONYMOUS_CODING	2649	883	F>F		0.86207	0.8955	0.58282	-	-	-		21.8391	87	ref		23	100	A/G		24.5902	122	A/G		6.31579	95	ref		46.3415	82	A/G		50.6173	81	A/G		40	85	A/G		36.5517	145
supercont1.110:1367288	G	A	Substitution	AAEL004222	AAEL004222-RA	Ion channel	voltage-dependent p/q type calcium channel	SYNONYMOUS_CODING	2595	865	D>D		0.89258	0.90097	0.88733	-	-	-		26.5823	79	ref		45.8824	85	A/G		35.514	107	A/G		0	83	ref		30.4348	69	ref		19.7183	71	A/G		15.0685	73	A/G		20.2899	138
supercont1.110:1367297	T	C	Substitution	AAEL004222	AAEL004222-RA	Ion channel	voltage-dependent p/q type calcium channel	SYNONYMOUS_CODING	2586	862	V>V		0.88672	0.89577	0.90085	-	-	-		1.21951	82	diff		10.8434	83	diff		11.2245	98	diff		0	91	diff		0	63	diff		0	61	diff		0	73	diff		0	124
supercont1.110:1367297	T	G	Substitution	AAEL004222	AAEL004222-RA	Ion channel	voltage-dependent p/q type calcium channel	SYNONYMOUS_CODING	2586	862	V>V		0.88672	0.89577	0.90085	-	-	-		76.8293	82	G		71.0843	83	G/T		76.5306	98	G/T		47.2527	91	G/T		93.6508	63	G		98.3607	61	G		80.8219	73	G/T		79.0323	124
supercont1.110:1367317	G	A	Substitution	AAEL004222	AAEL004222-RA	Ion channel	voltage-dependent p/q type calcium channel	SYNONYMOUS_CODING	2566	856	L>L		0.86759	0.87613	0.8821	-	-	-		1.2987	77	ref		8.88889	90	A/G		8.64198	81	ref		14.4578	83	ref		0	66	ref		0	67	ref		0	76	ref		0	116
supercont1.110:1367342	G	A	Substitution	AAEL004222	AAEL004222-RA	Ion channel	voltage-dependent p/q type calcium channel	SYNONYMOUS_CODING	2541	847	I>I		0.8869	0.83789	0.90458	Nakh	-	-		28.3582	67	ref		19.4444	72	A/G		7.89474	76	ref		0	80	ref		0	55	ref		0	58	ref		0	56	ref		0.909091	110
supercont1.110:1367650	C	T	Substitution	AAEL004222	AAEL004222-RA	Ion channel	voltage-dependent p/q type calcium channel	SYNONYMOUS_CODING	2403	801	E>E		0.88366	0.88141	0.90043	-	-	-		82.3529	34	T		67.3913	46	C/T		67.5676	37	C/T		44.8276	29	lc		64.7059	34	C/T		61.1111	36	C/T		40	40	C/T		49.2537	67
supercont1.110:1367659	T	C	Substitution	AAEL004222	AAEL004222-RA	Ion channel	voltage-dependent p/q type calcium channel	SYNONYMOUS_CODING	2394	798	K>K		0.88142	0.8924	0.89042	-	-	-		18.9189	37	ref		26	50	C/T		7.31707	41	ref		0	35	ref		0	32	ref		0	42	ref		6.97674	43	ref		1.28205	78
supercont1.110:1367671	C	T	Substitution	AAEL004222	AAEL004222-RA	Ion channel	voltage-dependent p/q type calcium channel	SYNONYMOUS_CODING	2382	794	K>K		0.88545	0.83226	0.89851	-	-	-		76.087	46	C/T		70	50	C/T		68.0851	47	C/T		38.2979	47	C/T		54.7619	42	C/T		65.9574	47	C/T		39.5833	48	C/T		51.1364	88
supercont1.110:1367689	C	A	Substitution	AAEL004222	AAEL004222-RA	Ion channel	voltage-dependent p/q type calcium channel	NON_SYNONYMOUS_CODING	2364	788	K>N		0.86759	0.88823	0.90199	-	-	-		0	68	ref		0	69	ref		0	57	ref		0	66	ref		3.33333	60	ref		21.8182	55	A/C		2.94118	68	ref		15.8416	101
supercont1.110:1368037	G	A	Substitution	AAEL004222	AAEL004222-RA	Ion channel	voltage-dependent p/q type calcium channel	SYNONYMOUS_CODING	2016	672	N>N		0.88278	0.88897	0.88981	-	-	-		7.6087	92	ref		2.83019	106	ref		11.3043	115	A/G		0	88	ref		0	97	ref		0	95	ref		0	110	ref		0	165
supercont1.110:1368091	T	G	Substitution	AAEL004222	AAEL004222-RA	Ion channel	voltage-dependent p/q type calcium channel	SYNONYMOUS_CODING	1962	654	G>G		0.86858	0.82405	0.90295	Nakh	-	-		22.619	84	ref		26.8908	119	G/T		18.1818	132	G/T		0	91	ref		0	113	ref		0	106	ref		0	109	ref		0	153
supercont1.110:1368094	G	A	Substitution	AAEL004222	AAEL004222-RA	Ion channel	voltage-dependent p/q type calcium channel	SYNONYMOUS_CODING	1959	653	L>L		0.60656	0.89043	0.87276	-	-	-		5.88235	85	ref		8.19672	122	ref		18.2482	137	A/G		50.5495	91	A/G		8.10811	111	ref		10.5769	104	A/G		14.6789	109	A/G		19.3333	150
supercont1.110:1368337	C	T	Substitution	AAEL004222	AAEL004222-RA	Ion channel	voltage-dependent p/q type calcium channel	SYNONYMOUS_CODING	1716	572	S>S		0.85521	0.90408	0.81598	-	-	-		41.2371	97	C/T		37.8788	132	C/T		40.458	131	C/T		0	153	ref		32.0312	128	C/T		23.3083	133	C/T		18.8976	127	C/T		13.2275	189
supercont1.110:1368373	T	C	Substitution	AAEL004222	AAEL004222-RA	Ion channel	voltage-dependent p/q type calcium channel	SYNONYMOUS_CODING	1680	560	K>K		0.78676	0.85783	0.78219	-	-	-		3.65854	82	ref		3.77358	106	ref		8.49057	106	C/T		0	116	ref		0	95	ref		0	103	ref		0	104	ref		0	141
supercont1.110:1368376	G	A	Substitution	AAEL004222	AAEL004222-RA	Ion channel	voltage-dependent p/q type calcium channel	SYNONYMOUS_CODING	1677	559	I>I		0.84588	0.88226	0.88766	-	-	-		13.5802	81	ref		18.8679	106	A/G		11.1111	108	A/G		0	113	ref		0	93	ref		0	102	ref		0	96	ref		0	140
supercont1.110:1368439	G	A	Substitution	AAEL004222	AAEL004222-RA	Ion channel	voltage-dependent p/q type calcium channel	INTRONIC					0.88609	0.87875	0.90167	Cayn; Nakh	-	-		7.54717	53	ref		5.66038	53	ref		7.84314	51	ref		0	64	ref		66.6667	48	A/G		54	50	A/G		33.3333	48	A/G		38.806	67
supercont1.110:1368446	T	G	Substitution	AAEL004222	AAEL004222-RA	Ion channel	voltage-dependent p/q type calcium channel	INTRONIC					0.86559	0.89118	0.88305	-	-	-		0	49	ref		0	45	ref		0	46	ref		0	57	ref		2.43902	41	ref		6.52174	46	ref		6.38298	47	ref		10	60
supercont1.110:1369193	C	G	Substitution	AAEL004222	AAEL004222-RA	Ion channel	voltage-dependent p/q type calcium channel	SYNONYMOUS_CODING	1605	535	P>P		0.8789	0.90063	0.8821	-	-	-		0	52	ref		0	61	ref		0	69	ref		0	69	ref		30.8824	68	ref		47.8261	69	C/G		30.3797	79	C/G		31.5789	114
supercont1.110:1369304	C	T	Substitution	AAEL004222	AAEL004222-RA	Ion channel	voltage-dependent p/q type calcium channel	SYNONYMOUS_CODING	1494	498	R>R		0.88589	0.88643	0.85494	Phet; Nakh	-	-		4.30108	93	ref		13.6752	117	C/T		15.3846	117	C/T		0	129	ref		0	116	ref		0.719425	139	ref		5.29801	151	ref		3.28638	213
supercont1.110:1369349	C	T	Substitution	AAEL004222	AAEL004222-RA	Ion channel	voltage-dependent p/q type calcium channel	SYNONYMOUS_CODING	1449	483	K>K		0.89472	0.87253	0.90188	-	-	-		0	91	ref		9.52381	105	C/T		12.2807	114	C/T		0	158	ref		0	105	ref		0	112	ref		0	131	ref		0	188
supercont1.110:1369382	G	T	Substitution	AAEL004222	AAEL004222-RA	Ion channel	voltage-dependent p/q type calcium channel	SYNONYMOUS_CODING	1416	472	T>T		0.85521	0.90145	0.84939	-	-	-		49.495	99	G/T		45.1923	104	G/T		46.1538	104	G/T		0	154	ref		27.027	111	ref		11.7647	102	G/T		10.0775	129	G/T		13.5135	185
supercont1.110:1369400	T	G	Substitution	AAEL004222	AAEL004222-RA	Ion channel	voltage-dependent p/q type calcium channel	SYNONYMOUS_CODING	1398	466	T>T		0.81735	0.90036	0.57239	Nakh	-	-		100	96	G		100	96	G		100	100	G		49.6241	133	G/T		98.1651	109	G		95.1456	103	G		78.8618	123	G/T		78.7565	193
supercont1.110:1369463	A	G	Substitution	AAEL004222	AAEL004222-RA	Ion channel	voltage-dependent p/q type calcium channel	SYNONYMOUS_CODING	1335	445	R>R		0.76822	0.70253	0.86853	-	-	-		57.3171	82	A/G		53.8462	78	A/G		57.8947	95	A/G		44.1667	120	A/G		35.8696	92	A/G		26.087	69	A/G		36.0656	122	A/G		26.2857	175
supercont1.110:1369478	A	G	Substitution	AAEL004222	AAEL004222-RA	Ion channel	voltage-dependent p/q type calcium channel	SYNONYMOUS_CODING	1320	440	Y>Y		0.83512	0.89001	0.46388	Phet	-	-		100	92	G		100	90	G		99.0385	104	G		57.6923	130	A/G		93.75	96	G		93.75	80	G		82.5397	126	A/G		80.226	177
supercont1.110:1369517	G	A	Substitution	AAEL004222	AAEL004222-RA	Ion channel	voltage-dependent p/q type calcium channel	SYNONYMOUS_CODING	1281	427	I>I		0.87726	0.90085	0.89081	-	-	-		42.1053	95	A/G		38.8235	85	A/G		40.5405	111	A/G		0	109	ref		25.5319	94	ref		26.7442	86	A/G		6.29921	127	ref		14.0244	164
supercont1.110:1369526	C	T	Substitution	AAEL004222	AAEL004222-RA	Ion channel	voltage-dependent p/q type calcium channel	SYNONYMOUS_CODING	1272	424	E>E		0.83512	0.85593	0.89101	-	-	-		10.4167	96	ref		11.25	80	C/T		16.5138	109	C/T		0	110	ref		0	93	ref		0	88	ref		0	116	ref		0	155
supercont1.110:1397629	G	A	Substitution	AAEL004222	AAEL004222-RA	Ion channel	voltage-dependent p/q type calcium channel	INTRONIC					0.8735	0.89145	0.83871	-	-	-		7.14286	56	ref		1.96078	51	ref		12.5	48	A/G		0	69	ref		0	61	ref		0	45	ref		0	54	ref		0	69
supercont1.110:1397634	C	T	Substitution	AAEL004222	AAEL004222-RA	Ion channel	voltage-dependent p/q type calcium channel	INTRONIC					0.81986	0.83346	0.85878	Cayn	-	-		52.5424	59	C/T		60.7843	51	C/T		42.8571	49	C/T		0	71	ref		70.9677	62	C/T		56.25	48	C/T		48.0769	52	C/T		52.0548	73
supercont1.110:1397718	G	A	Substitution	AAEL004222	AAEL004222-RA	Ion channel	voltage-dependent p/q type calcium channel	SYNONYMOUS_CODING	507	169	H>H		0.88059	0.90008	0.86853	-	-	-		0	104	ref		0	84	ref		0	75	ref		0	94	ref		37.3737	99	A/G		46.1538	78	A/G		34.9398	83	A/G		33.1034	145
supercont1.110:1397733	G	T	Substitution	AAEL004222	AAEL004222-RA	Ion channel	voltage-dependent p/q type calcium channel	SYNONYMOUS_CODING	492	164	L>L		0.89232	0.86424	0.90105	-	-	-		0	113	ref		9.18367	98	G/T		15.9091	88	G/T		1	100	ref		0	104	ref		0	78	ref		0	92	ref		0	163
supercont1.110:1397763	C	T	Substitution	AAEL004222	AAEL004222-RA	Ion channel	voltage-dependent p/q type calcium channel	SYNONYMOUS_CODING	462	154	T>T		0.87726	0.90072	0.876	-	-	-		56.7568	111	C/T		61.3207	106	C/T		53.271	107	C/T		0	115	ref		37.3832	107	C/T		18.75	80	C/T		20.9091	110	C/T		22.3684	152
supercont1.110:1397801	G	A	Substitution	AAEL004222	AAEL004222-RA	Ion channel	voltage-dependent p/q type calcium channel	SYNONYMOUS_CODING	424	142	L>L		0.84198	0.90282	0.86036	-	-	-		64.4737	76	A/G		58.9286	112	A/G		59.434	106	A/G		0	100	ref		34.0206	97	A/G		24.3243	74	A/G		22	100	A/G		24.1135	141
supercont1.110:1397850	G	A	Substitution	AAEL004222	AAEL004222-RA	Ion channel	voltage-dependent p/q type calcium channel	SYNONYMOUS_CODING	375	125	A>A		0.89163	0.86633	0.89589	-	-	-		0	90	ref		11.3402	97	A/G		10.7143	84	A/G		1.04167	96	ref		0	102	ref		0	93	ref		0	91	ref		0	151
supercont1.110:1397889	G	A	Substitution	AAEL004222	AAEL004222-RA	Ion channel	voltage-dependent p/q type calcium channel	SYNONYMOUS_CODING	336	112	A>A		0.89269	0.86707	0.47388	Nakh	-	-		10.5882	85	ref		2.88462	104	ref		6	100	ref		0.980392	102	ref		13.1868	91	ref		15.1515	99	A/G		13.3333	105	A/G		8.05369	149
supercont1.110:1397901	G	A	Substitution	AAEL004222	AAEL004222-RA	Ion channel	voltage-dependent p/q type calcium channel	SYNONYMOUS_CODING	324	108	P>P		0.89017	0.9036	0.8557	-	-	-		38.0952	84	A/G		51.8519	108	A/G		48.8889	90	A/G		0	98	ref		34.8315	89	A/G		19.3878	98	A/G		19.8113	106	A/G		19.4444	144
supercont1.110:1397904	C	T	Substitution	AAEL004222	AAEL004222-RA	Ion channel	voltage-dependent p/q type calcium channel	SYNONYMOUS_CODING	321	107	P>P		0.79693	0.89893	0.87478	-	-	-		0	74	ref		0	109	ref		0	91	ref		0	91	ref		40.5063	79	C/T		46.2366	93	C/T		27.451	102	C/T		36.8056	144
supercont1.110:1397925	A	T	Substitution	AAEL004222	AAEL004222-RA	Ion channel	voltage-dependent p/q type calcium channel	SYNONYMOUS_CODING	300	100	T>T		0.78292	0.90414	0.90378	Nakh	-	-		100	73	T		100	111	T		100	87	T		61.3636	88	A/T		96.25	80	T		94.8718	78	T		73.9583	96	A/T		81.9549	133
supercont1.110:1397935	G	T	Substitution	AAEL004222	AAEL004222-RA	Ion channel	voltage-dependent p/q type calcium channel	SPLICE_SITE					0.84415	0.88098	0.8821	-	-	-		22.3881	67	ref		16	100	G/T		8.86076	79	ref		0	86	ref		0	76	ref		0	73	ref		0	88	ref		0	130
supercont1.110:1397945	CA	C	Deletion	AAEL004222	AAEL004222-RA	Ion channel	voltage-dependent p/q type calcium channel	INTRONIC					na	na	na	-	na	-		5.45455	55	ref		4.08163	98	ref		3.8961	77	ref		0	86	ref		0	90	ref		0	69	ref		0	81	ref		0	121
supercont1.110:1397985	T	A	Substitution	AAEL004222	AAEL004222-RA	Ion channel	voltage-dependent p/q type calcium channel	INTRONIC					0.88214	0.8712	0.89691	-	-	-		0	64	ref		0	102	ref		0	76	ref		0	90	ref		0	106	ref		0	78	ref		0	92	ref		0	130
supercont1.110:1398015	G	A	Substitution	AAEL004222	AAEL004222-RA	Ion channel	voltage-dependent p/q type calcium channel	INTRONIC					0.88815	0.87923	0.87411	-	-	-		21.0526	76	ref		10.989	91	A/G		16.092	87	A/G		1.04167	96	ref		0	98	ref		0	83	ref		0	99	ref		0	126
supercont1.110:1398017	A	T	Substitution	AAEL004222	AAEL004222-RA	Ion channel	voltage-dependent p/q type calcium channel	INTRONIC					0.86207	0.83957	0.87542	-	-	-		10.8108	74	ref		4.3956	91	ref		8.13954	86	ref		0	95	ref		0	83	ref		0	84	ref		0	99	ref		0	128
supercont1.110:1398020	C	T	Substitution	AAEL004222	AAEL004222-RA	Ion channel	voltage-dependent p/q type calcium channel	SPLICE_SITE					0.88799	0.87314	0.87139	-	-	-		11.25	80	ref		5.10204	98	ref		8.23529	85	ref		0	96	ref		0	93	ref		0	86	ref		0	98	ref		0	130
supercont1.110:1398123	T	C	Substitution	AAEL004222	AAEL004222-RA	Ion channel	voltage-dependent p/q type calcium channel	SYNONYMOUS_CODING	198	66	K>K		0.89134	0.81602	0.90286	-	-	-		53.4483	58	C/T		31.1111	90	C/T		49	100	C/T		54.5455	88	C/T		71.0526	76	C/T		67.7419	62	C/T		60	70	C/T		65.1852	135
supercont1.110:1398126	C	T	Substitution	AAEL004222	AAEL004222-RA	Ion channel	voltage-dependent p/q type calcium channel	SYNONYMOUS_CODING	195	65	K>K		0.8895	0.90331	0.84376	-	-	-		50	58	C/T		67.0455	88	C/T		49.505	101	C/T		0	89	ref		30.9859	71	ref		29.5082	61	C/T		21.2121	66	C/T		17.5573	131
supercont1.1104:107164	C	T	Substitution	AAEL014413	AAEL014413-RA	P450	cytochrome P450 CYP304C1	SYNONYMOUS_CODING	37	13	L>L		0.81735	0.90429	0.85878	-	-	-		73.913	115	C/T		68.0672	119	C/T		84.0278	144	C/T		0.70922	141	ref		41.4062	128	C/T		40.6504	123	C/T		35.7143	154	C/T		29.1667	216
supercont1.1104:107187	T	C	Substitution	AAEL014413	AAEL014413-RA	P450	cytochrome P450 CYP304C1	SYNONYMOUS_CODING	60	20	F>F		0.66634	0.83226	0.90453	StGe	-	-		100	103	C		100	111	C		100	128	C		0.729927	137	ref		89.0909	110	C		89.2562	121	C/T		58.4	125	C/T		52.6316	190
supercont1.1104:107214	G	A	Substitution	AAEL014413	AAEL014413-RA	P450	cytochrome P450 CYP304C1	SYNONYMOUS_CODING	87	29	S>S		0.87041	0.8971	0.89803	-	-	-		18.8406	69	ref		26.8657	67	A/G		16.9231	65	A/G		0	116	ref		12.8205	78	ref		13.7931	87	A/G		15.1163	86	A/G		10.0671	149
supercont1.1104:107307	G	A	Substitution	AAEL014413	AAEL014413-RA	P450	cytochrome P450 CYP304C1	SYNONYMOUS_CODING	180	60	A>A		0.85669	0.88897	0.89101	-	-	-		1.96078	51	ref		5.88235	51	ref		1.5625	64	ref		0	95	ref		4.25532	47	ref		8.47458	59	ref		4.47761	67	ref		5.98291	117
supercont1.1104:107310	C	A	Substitution	AAEL014413	AAEL014413-RA	P450	cytochrome P450 CYP304C1	SYNONYMOUS_CODING	183	61	A>A		0.85953	0.89636	0.89712	-	-	-		2.08333	48	ref		7.54717	53	ref		1.51515	66	ref		0	102	ref		8	50	ref		8.33333	60	ref		5.55556	72	ref		6.77966	118
supercont1.1104:107337	G	A	Substitution	AAEL014413	AAEL014413-RA	P450	cytochrome P450 CYP304C1	SYNONYMOUS_CODING	210	70	K>K		0.8767	0.90022	0.51109	Cayn; Nakh	-	-		81.6326	49	A		80.3279	61	A/G		89.8734	79	A/G		0	87	ref		46.1538	52	A/G		31.25	64	A/G		33.8028	71	A/G		30.8943	123
supercont1.1104:107343	T	C	Substitution	AAEL014413	AAEL014413-RA	P450	cytochrome P450 CYP304C1	SYNONYMOUS_CODING	216	72	I>I		0.87199	0.79367	0.73779	Cayn	-	-		81.4815	54	C		78.3333	60	C/T		89.6104	77	C/T		0	78	ref		75.4386	57	C/T		63.4921	63	C/T		37.5	72	C/T		37.9845	129
supercont1.1104:107346	G	C	Substitution	AAEL014413	AAEL014413-RA	P450	cytochrome P450 CYP304C1	SYNONYMOUS_CODING	219	73	G>G		0.87126	0.76389	0.68044	Cayn	-	-		80	50	C		78.3333	60	C/G		86.9565	69	C/G		0	81	ref		78.1818	55	C		65	60	C/G		37.6812	69	C/G		36.8	125
supercont1.1104:107442	A	G	Substitution	AAEL014413	AAEL014413-RA	P450	cytochrome P450 CYP304C1	SYNONYMOUS_CODING	315	105	L>L		0.8834	0.87875	0.83592	StGe	-	-		83.0189	53	G		72	75	A/G		77.6596	94	A/G		0	70	ref		67.1642	67	A/G		67.1642	67	A/G		43.0556	72	A/G		33.0709	127
supercont1.1104:107463	T	C	Substitution	AAEL014413	AAEL014413-RA	P450	cytochrome P450 CYP304C1	SYNONYMOUS_CODING	336	112	D>D		0.86858	0.8955	0.89467	-	-	-		82.9787	47	C		72	50	C/T		71.6216	74	C/T		0	70	ref		58.4906	53	C/T		60.3448	58	C/T		37.8788	66	C/T		31.25	112
supercont1.1104:127889	C	T	Substitution	AAEL014413	AAEL014413-RA	P450	cytochrome P450 CYP304C1	SYNONYMOUS_CODING	372	124	D>D		0.88963	0.88568	0.88825	-	-	-		7.84314	51	ref		0	62	ref		0	46	ref		0	47	ref		0	31	ref		0	32	ref		0	50	ref		0	77
supercont1.1104:128009	C	T	Substitution	AAEL014413	AAEL014413-RA	P450	cytochrome P450 CYP304C1	SYNONYMOUS_CODING	492	164	S>S		0.86083	0.81696	0.892	StGe	-	-		7.14286	84	ref		0	83	ref		0	89	ref		100	74	T		74.6269	67	C/T		64	50	C/T		33.7079	89	C/T		48.2517	143
supercont1.1104:128013	T	C	Substitution	AAEL014413	AAEL014413-RA	P450	cytochrome P450 CYP304C1	SYNONYMOUS_CODING	496	166	L>L		0.71829	0.87253	0.89589	StGe	-	-		6.0241	83	ref		0	86	ref		0	90	ref		100	76	C		67.7419	62	C/T		66.6667	48	C/T		35.5556	90	C/T		48.2759	145
supercont1.1104:128060	T	C	Substitution	AAEL014413	AAEL014413-RA	P450	cytochrome P450 CYP304C1	SYNONYMOUS_CODING	543	181	S>S		0.87488	0.89698	0.86928	-	-	-		0	86	ref		0	85	ref		0	117	ref		0	73	ref		10.3448	58	ref		12.1212	66	C/T		4.3956	91	ref		2.85714	140
supercont1.1104:128096	T	C	Substitution	AAEL014413	AAEL014413-RA	P450	cytochrome P450 CYP304C1	SYNONYMOUS_CODING	579	193	A>A		0.65376	0.84815	0.89775	-	-	-		15.942	69	ref		0	70	ref		0	88	ref		100	57	C		61.5385	52	C/T		25.9259	54	C/T		30.2326	86	C/T		35.0515	97
supercont1.1104:128105	A	G	Substitution	AAEL014413	AAEL014413-RA	P450	cytochrome P450 CYP304C1	SYNONYMOUS_CODING	588	196	S>S		0.80268	0.67319	0.89431	StGe	-	-		9.09091	55	ref		0	74	ref		0	74	ref		100	48	G		78.8461	52	G		50	50	A/G		27.2727	77	A/G		40.9639	83
supercont1.1104:128294	C	T	Substitution	AAEL014413	AAEL014413-RA	P450	cytochrome P450 CYP304C1	SYNONYMOUS_CODING	714	238	S>S		0.8667	0.8932	0.90501	-	-	-		0	79	ref		0	80	ref		0	97	ref		0	79	ref		0	73	ref		0	82	ref		6.32911	79	ref		6.66667	135
supercont1.1104:128300	C	T	Substitution	AAEL014413	AAEL014413-RA	P450	cytochrome P450 CYP304C1	SYNONYMOUS_CODING	720	240	I>I		0.88059	0.88968	0.90394	-	-	-		0	86	ref		0	82	ref		0	88	ref		0	88	ref		0	68	ref		0	85	ref		6.09756	82	ref		6.99301	143
supercont1.1104:128312	G	A	Substitution	AAEL014413	AAEL014413-RA	P450	cytochrome P450 CYP304C1	SYNONYMOUS_CODING	732	244	R>R		0.88654	0.90121	0.80099	-	-	-		5.74713	87	ref		0	82	ref		0	96	ref		0	83	ref		17.4419	86	ref		26.25	80	A/G		5.81395	86	ref		4.79452	146
supercont1.1104:128741	G	T	Substitution	AAEL014413	AAEL014413-RA	P450	cytochrome P450 CYP304C1	NON_SYNONYMOUS_CODING	1104	368	L>F		0.88394	0.89383	0.88391	-	-	-		0	121	ref		0	136	ref		0	174	ref		0	125	ref		5.34351	131	ref		8.84956	113	G/T		0	118	ref		0.97561	205
supercont1.1104:128835	G	C	Substitution	AAEL014413	AAEL014413-RA	P450	cytochrome P450 CYP304C1	NON_SYNONYMOUS_CODING	1198	400	V>L		0.74973	0.90251	0.90247	-	-	-		0	134	ref		0	166	ref		0	179	ref		0	156	ref		20.6612	121	ref		29.4643	112	C/G		6.21118	161	ref		5.93607	219
supercont1.1104:128891	C	T	Substitution	AAEL014413	AAEL014413-RA	P450	cytochrome P450 CYP304C1	SYNONYMOUS_CODING	1254	418	N>N		0.74973	0.90145	0.90526	-	-	-		0	136	ref		0	154	ref		0	122	ref		0	140	ref		20.155	129	ref		29.3578	109	C/T		4.34783	161	ref		6.13208	212
supercont1.1104:128933	T	C	Substitution	AAEL014413	AAEL014413-RA	P450	cytochrome P450 CYP304C1	SYNONYMOUS_CODING	1296	432	D>D		0.87549	0.90222	0.90446	-	-	-		0	110	ref		0	138	ref		0	132	ref		0	128	ref		20.3704	108	ref		25.5319	94	C/T		3.62319	138	ref		4.6875	192
supercont1.1104:139491	C	T	Substitution	AAEL014412	AAEL014412-RA	P450	cytochrome P450 CYP304B2	SYNONYMOUS_CODING	72	24	F>F		0.8667	0.89621	0.90527	-	-	-		29.3478	92	ref		27.381	84	C/T		26.4463	121	C/T		0	99	ref		8.75	80	ref		8.43374	83	ref		2.4	125	ref		8.22785	158
supercont1.1104:139508	A	G	Substitution	AAEL014412	AAEL014412-RA	P450	cytochrome P450 CYP304B2	NON_SYNONYMOUS_CODING	89	30	K>R		0.88024	0.88595	0.89917	-	-	-		0	87	ref		0	92	ref		0	130	ref		0	95	ref		0	93	ref		0	84	ref		0	124	ref		0	166
supercont1.1104:139530	G	C	Substitution	AAEL014412	AAEL014412-RA	P450	cytochrome P450 CYP304B2	SYNONYMOUS_CODING	111	37	P>P		0.86759	0.89447	0.89535	-	-	-		20.8791	91	ref		24	100	C/G		27.6423	123	C/G		0	91	ref		7.31707	82	ref		6.57895	76	ref		0.892857	112	ref		4.93827	162
supercont1.1104:139533	G	A	Substitution	AAEL014412	AAEL014412-RA	P450	cytochrome P450 CYP304B2	SYNONYMOUS_CODING	114	38	K>K		0.83979	0.87779	0.89679	-	-	-		0	95	ref		0	101	ref		0	120	ref		0	91	ref		0	84	ref		0	74	ref		0	108	ref		0	158
supercont1.1104:139534	T	A	Substitution	AAEL014412	AAEL014412-RA	P450	cytochrome P450 CYP304B2	NON_SYNONYMOUS_CODING	115	39	F>I		0.88445	0.90384	0.86694	-	-	-		0	94	ref		0	100	ref		0	119	ref		0	80	ref		23.6842	76	ref		21.9178	73	A/T		6.54206	107	ref		7.74194	155
supercont1.1104:139623	G	C	Substitution	AAEL014412	AAEL014412-RA	P450	cytochrome P450 CYP304B2	SYNONYMOUS_CODING	204	68	R>R		0.83979	0.88802	0.89276	-	-	-		0	93	ref		0	113	ref		0	120	ref		0	98	ref		0	87	ref		0	89	ref		0	103	ref		0	154
supercont1.1104:139788	G	A	Substitution	AAEL014412	AAEL014412-RA	P450	cytochrome P450 CYP304B2	SYNONYMOUS_CODING	369	123	T>T		0.86559	0.88918	0.8912	-	-	-		0	87	ref		0	86	ref		0	105	ref		0	90	ref		0	86	ref		0	87	ref		0	93	ref		0	149
supercont1.1104:139796	C	T	Substitution	AAEL014412	AAEL014412-RA	P450	cytochrome P450 CYP304B2	NON_SYNONYMOUS_CODING	377	126	P>L		0.86959	0.87314	0.89656	-	-	-		0	95	ref		0	88	ref		0	109	ref		0	102	ref		0	91	ref		0	88	ref		0	92	ref		0	146
supercont1.1104:139839	C	T	Substitution	AAEL014412	AAEL014412-RA	P450	cytochrome P450 CYP304B2	SYNONYMOUS_CODING	420	140	R>R		0.88878	0.8955	0.84871	-	-	-		6.66667	90	ref		0	102	ref		0	122	ref		0	110	ref		11	100	ref		12.9412	85	C/T		12.8713	101	C/T		2.96296	135
supercont1.1104:139889	C	A	Substitution	AAEL014412	AAEL014412-RA	P450	cytochrome P450 CYP304B2	NON_SYNONYMOUS_CODING	470	157	A>E		0.88059	0.88802	0.90276	-	-	-		12.7907	86	ref		17.0213	94	A/C		7.89474	114	ref		0	107	ref		1.19048	84	ref		4.93827	81	ref		2.15054	93	ref		2.91971	137
supercont1.1104:139917	C	T	Substitution	AAEL014412	AAEL014412-RA	P450	cytochrome P450 CYP304B2	SYNONYMOUS_CODING	498	166	L>L		0.88445	0.89331	0.90159	-	-	-		14.2857	77	ref		8.69565	92	ref		2.88462	104	ref		0	94	ref		26.3158	76	ref		33.3333	87	C/T		14.4444	90	C/T		5.22388	134
supercont1.1104:139926	G	A	Substitution	AAEL014412	AAEL014412-RA	P450	cytochrome P450 CYP304B2	SYNONYMOUS_CODING	507	169	G>G		0.83512	0.89156	0.89905	-	-	-		0	82	ref		0	91	ref		0	100	ref		0	89	ref		6.57895	76	ref		18.6046	86	A/G		11.828	93	A/G		2.14286	140
supercont1.1104:139947	G	A	Substitution	AAEL014412	AAEL014412-RA	P450	cytochrome P450 CYP304B2	SYNONYMOUS_CODING	528	176	T>T		0.88726	0.86159	0.89567	-	-	-		0	77	ref		0	89	ref		0	111	ref		0	105	ref		0	78	ref		0	79	ref		0	97	ref		0	154
supercont1.1104:139959	G	C	Substitution	AAEL014412	AAEL014412-RA	P450	cytochrome P450 CYP304B2	SYNONYMOUS_CODING	540	180	T>T		0.79006	0.89156	0.85007	-	-	-		5.74713	87	ref		5.15464	97	ref		4.20168	119	ref		0	112	ref		3.94737	76	ref		3.8961	77	ref		0	96	ref		5.06329	158
supercont1.1104:139962	A	G	Substitution	AAEL014412	AAEL014412-RA	P450	cytochrome P450 CYP304B2	SYNONYMOUS_CODING	543	181	K>K		0.74973	0.88568	0.82428	-	-	-		8.04598	87	ref		4.9505	101	ref		4.16667	120	ref		0	108	ref		2.73973	73	ref		7.5	80	ref		1.0101	99	ref		5.73248	157
supercont1.1104:139969	T	A	Substitution	AAEL014412	AAEL014412-RA	P450	cytochrome P450 CYP304B2	NON_SYNONYMOUS_CODING	550	184	C>S		0.86207	0.89839	0.87779	-	-	-		0	92	ref		0	94	ref		0	119	ref		0	115	ref		9.52381	84	ref		23.5294	85	A/T		14.9533	107	A/T		2.51572	159
supercont1.1104:139996	G	A	Substitution	AAEL014412	AAEL014412-RA	P450	cytochrome P450 CYP304B2	NON_SYNONYMOUS_CODING	577	193	A>T		0.88181	0.90132	0.88628	-	-	-		0	103	ref		0	106	ref		0	133	ref		0	104	ref		4.30108	93	ref		24.2424	99	A/G		16.6667	114	A/G		3.27869	183
supercont1.1104:140004	T	C	Substitution	AAEL014412	AAEL014412-RA	P450	cytochrome P450 CYP304B2	SYNONYMOUS_CODING	585	195	F>F		0.87613	0.89087	0.87836	-	-	-		10.0917	109	ref		18.018	111	C/T		12.5	128	C/T		0	117	ref		4.16667	96	ref		8.51064	94	ref		1.8018	111	ref		2.71739	184
supercont1.1104:140052	C	A	Substitution	AAEL014412	AAEL014412-RA	P450	cytochrome P450 CYP304B2	NON_SYNONYMOUS_CODING	633	211	D>E		0.87613	0.90293	0.89431	-	-	-		0	85	ref		0	101	ref		0	107	ref		0	97	ref		21.1538	104	ref		14.9425	87	A/C		3.125	96	ref		3.81679	131
supercont1.1104:140115	T	C	Substitution	AAEL014412	AAEL014412-RA	P450	cytochrome P450 CYP304B2	INTRONIC					0.84769	0.89087	0.90325	-	-	-		0	40	ref		0	60	ref		0	56	ref		0	41	ref		0	41	ref		0	61	ref		0	46	ref		0	75
supercont1.1104:140117	T	A	Substitution	AAEL014412	AAEL014412-RA	P450	cytochrome P450 CYP304B2	INTRONIC					0.85669	0.88935	0.81525	-	-	-		15.6863	51	ref		14.5161	62	A/T		14.5455	55	A/T		0	55	ref		7.14286	42	ref		13.7931	58	A/T		0	47	ref		3.8961	77
supercont1.1104:152268	A	T	Substitution	AAEL014412	AAEL014412-RA	P450	cytochrome P450 CYP304B2	NON_SYNONYMOUS_CODING	673	225	M>L		0.88142	0.90145	0.90458	-	-	-		0	99	ref		0	116	ref		0	91	ref		0	113	ref		26.8518	108	ref		28.8462	104	A/T		5.98291	117	ref		3.84615	156
supercont1.1104:152333	A	C	Substitution	AAEL014412	AAEL014412-RA	P450	cytochrome P450 CYP304B2	NON_SYNONYMOUS_CODING	738	246	L>F		0.86455	0.89824	0.90359	-	-	-		24.2105	95	ref		19.4175	103	A/C		19.5876	97	A/C		0	139	ref		25.7426	101	ref		28.4314	102	A/C		6.10687	131	ref		7.61421	197
supercont1.1104:152474	G	A	Substitution	AAEL014412	AAEL014412-RA	P450	cytochrome P450 CYP304B2	SYNONYMOUS_CODING	879	293	E>E		0.88394	0.89196	0.79755	-	-	-		7.35294	68	ref		7.14286	70	ref		7.05882	85	ref		0	86	ref		1.6129	62	ref		0	73	ref		0	95	ref		3.96825	126
supercont1.1104:152486	G	T	Substitution	AAEL014412	AAEL014412-RA	P450	cytochrome P450 CYP304B2	SYNONYMOUS_CODING	891	297	T>T		0.87549	0.87969	0.74749	-	-	-		6.55738	61	ref		11.25	80	G/T		2.43902	82	ref		0	90	ref		1.53846	65	ref		1.47059	68	ref		0	97	ref		3.87597	129
supercont1.1104:152487	G	A	Substitution	AAEL014412	AAEL014412-RA	P450	cytochrome P450 CYP304B2	NON_SYNONYMOUS_CODING	892	298	V>I		0.79385	0.90262	0.89645	-	-	-		0	59	ref		0	79	ref		0	86	ref		0	80	ref		19.0476	63	ref		20.5882	68	A/G		3.06122	98	ref		7.8125	128
supercont1.1104:152489	C	T	Substitution	AAEL014412	AAEL014412-RA	P450	cytochrome P450 CYP304B2	SYNONYMOUS_CODING	894	298	V>V		0.87613	0.90008	0.90247	-	-	-		3.27869	61	ref		10.6667	75	ref		1.16279	86	ref		0	94	ref		18.4615	65	ref		21.5385	65	C/T		3.06122	98	ref		9.16031	131
supercont1.1104:152641	A	G	Substitution	AAEL014412	AAEL014412-RA	P450	cytochrome P450 CYP304B2	SYNONYMOUS_CODING	990	330	T>T		0.76078	0.89251	0.83746	-	-	-		22.093	86	ref		20.4918	122	A/G		14.9123	114	A/G		0	111	ref		13.8889	72	ref		21.519	79	A/G		0.813008	123	ref		10.0559	179
supercont1.1104:152650	T	C	Substitution	AAEL014412	AAEL014412-RA	P450	cytochrome P450 CYP304B2	SYNONYMOUS_CODING	999	333	A>A		0.88308	0.89577	0.87542	-	-	-		16.4835	91	ref		21.3675	117	C/T		14.7541	122	C/T		0	108	ref		18.6046	86	ref		22.7273	88	C/T		0.884956	113	ref		9.77012	174
supercont1.1104:152725	A	G	Substitution	AAEL014412	AAEL014412-RA	P450	cytochrome P450 CYP304B2	SYNONYMOUS_CODING	1074	358	G>G		0.79974	0.89893	0.89621	-	-	-		0	57	ref		0	70	ref		0	89	ref		0	59	ref		13.4328	67	ref		21.25	80	A/G		2.43902	82	ref		1.65289	121
supercont1.1104:152859	G	A	Substitution	AAEL014412	AAEL014412-RA	P450	cytochrome P450 CYP304B2	NON_SYNONYMOUS_CODING	1208	403	R>H		0.88963	0.89685	0.89656	-	-	-		16.6667	42	ref		30.7692	65	A/G		15.3846	52	A/G		0	50	ref		10.5263	38	ref		2.22222	45	ref		2.12766	47	ref		5.6338	71
supercont1.1104:152911	T	C	Substitution	AAEL014412	AAEL014412-RA	P450	cytochrome P450 CYP304B2	SYNONYMOUS_CODING	1260	420	I>I		0.88101	0.8971	0.89851	-	-	-		23.0769	39	ref		16.3265	49	C/T		10	50	ref		0	42	ref		9.30232	43	ref		0	40	ref		2.27273	44	ref		7.14286	70
supercont1.1104:163717	A	G	Substitution	AAEL014411	AAEL014411-RA	P450	cytochrome P450 CYP304B3	NON_SYNONYMOUS_CODING	52	18	I>V		0.83034	0.84443	0.90305	-	-	-		0	108	ref		0	120	ref		0	147	ref		0.854701	117	ref		7.92079	101	ref		13.3929	112	A/G		12.7119	118	A/G		3.33333	150
supercont1.1104:163719	A	C	Substitution	AAEL014411	AAEL014411-RA	P450	cytochrome P450 CYP304B3	SYNONYMOUS_CODING	54	18	I>I		0.77897	0.89919	0.90177	-	-	-		18.8119	101	ref		19.8276	116	A/C		11.8056	144	A/C		0	113	ref		28.4314	102	A/C		22.9358	109	A/C		4.20168	119	ref		16.1074	149
supercont1.1104:163734	A	G	Substitution	AAEL014411	AAEL014411-RA	P450	cytochrome P450 CYP304B3	SYNONYMOUS_CODING	69	23	R>R		0.88142	0.8985	0.89905	-	-	-		16.6667	84	ref		21.2389	113	A/G		12.5	120	A/G		0	92	ref		28	100	ref		22.3214	112	A/G		3.66972	109	ref		11.9497	159
supercont1.1104:163785	C	T	Substitution	AAEL014411	AAEL014411-RA	P450	cytochrome P450 CYP304B3	SYNONYMOUS_CODING	120	40	P>P		0.87549	0.90085	0.89656	-	-	-		8.57143	70	ref		10.3448	87	C/T		5.49451	91	ref		0	92	ref		14.2857	70	ref		14.0625	64	C/T		5.31915	94	ref		7.14286	140
supercont1.1104:163791	C	T	Substitution	AAEL014411	AAEL014411-RA	P450	cytochrome P450 CYP304B3	SYNONYMOUS_CODING	126	42	L>L		0.82275	0.89893	0.89968	-	-	-		5.33333	75	ref		8.13954	86	ref		1.25	80	ref		0	95	ref		12.3077	65	ref		12.9032	62	C/T		2.06186	97	ref		2.22222	135
supercont1.1104:163810	T	C	Substitution	AAEL014411	AAEL014411-RA	P450	cytochrome P450 CYP304B3	SYNONYMOUS_CODING	145	49	L>L		0.76467	0.88299	0.82629	-	-	-		0	83	ref		0	74	ref		0	84	ref		0	97	ref		6.12245	49	ref		13.7255	51	C/T		7.07965	113	ref		1.63934	122
supercont1.1104:163818	G	C	Substitution	AAEL014411	AAEL014411-RA	P450	cytochrome P450 CYP304B3	SYNONYMOUS_CODING	153	51	V>V		0.88024	0.89058	0.82039	-	-	-		0	73	ref		0	65	ref		1.21951	82	ref		0	92	ref		4.16667	48	ref		14.0351	57	C/G		6.19469	113	ref		2.58621	116
supercont1.1104:163827	A	G	Substitution	AAEL014411	AAEL014411-RA	P450	cytochrome P450 CYP304B3	SYNONYMOUS_CODING	162	54	R>R		0.83034	0.88781	0.88766	-	-	-		0	62	ref		0	65	ref		0	83	ref		0	88	ref		2.38095	42	ref		9.80392	51	ref		5.30973	113	ref		1.68067	119
supercont1.1104:163884	C	T	Substitution	AAEL014411	AAEL014411-RA	P450	cytochrome P450 CYP304B3	SYNONYMOUS_CODING	219	73	G>G		0.85669	0.89577	0.88516	-	-	-		2.08333	48	ref		0	69	ref		0	66	ref		0	69	ref		0	42	ref		8.51064	47	ref		8.64198	81	ref		5.7377	122
supercont1.1104:163908	G	A	Substitution	AAEL014411	AAEL014411-RA	P450	cytochrome P450 CYP304B3	SYNONYMOUS_CODING	243	81	S>S		0.87978	0.8862	0.89725	-	-	-		0	69	ref		0	80	ref		0	59	ref		0	61	ref		0	49	ref		2.7027	37	ref		1.25	80	ref		0.775194	129
supercont1.1104:163911	T	A	Substitution	AAEL014411	AAEL014411-RA	P450	cytochrome P450 CYP304B3	SYNONYMOUS_CODING	246	82	I>I		0.86858	0.8862	0.876	-	-	-		0	68	ref		0	81	ref		0	60	ref		0	68	ref		1.81818	55	ref		5.26316	38	ref		1.21951	82	ref		0.724638	138
supercont1.1104:163959	A	G	Substitution	AAEL014411	AAEL014411-RA	P450	cytochrome P450 CYP304B3	SYNONYMOUS_CODING	294	98	E>E		0.88589	0.89293	0.88667	-	-	-		8.95522	67	ref		1.42857	70	ref		0	60	ref		0	71	ref		5.88235	51	ref		6.34921	63	ref		0	96	ref		0	133
supercont1.1104:164037	T	C	Substitution	AAEL014411	AAEL014411-RA	P450	cytochrome P450 CYP304B3	SYNONYMOUS_CODING	372	124	D>D		0.85813	0.82059	0.90433	-	-	-		5.55556	72	ref		12.6214	103	C/T		4.16667	72	ref		1.05263	95	ref		7.5	80	ref		23.9437	71	C/T		3.06122	98	ref		3.08642	162
supercont1.1104:164067	T	C	Substitution	AAEL014411	AAEL014411-RA	P450	cytochrome P450 CYP304B3	SYNONYMOUS_CODING	402	134	F>F		0.75692	0.89473	0.89656	-	-	-		1.40845	71	ref		2.29885	87	ref		1.25	80	ref		0	112	ref		6.25	64	ref		1.33333	75	ref		1.04167	96	ref		1.98676	151
supercont1.1104:164091	C	T	Substitution	AAEL014411	AAEL014411-RA	P450	cytochrome P450 CYP304B3	SYNONYMOUS_CODING	426	142	Y>Y		0.85521	0.90154	0.90043	-	-	-		11.6883	77	ref		12.1212	99	C/T		13.0435	115	C/T		0	124	ref		18.5185	81	ref		15.1163	86	C/T		5.50459	109	ref		7.26257	179
supercont1.1104:164100	C	T	Substitution	AAEL014411	AAEL014411-RA	P450	cytochrome P450 CYP304B3	SYNONYMOUS_CODING	435	145	G>G		0.88059	0.89725	0.90286	-	-	-		12.6761	71	ref		12.8713	101	C/T		16.3462	104	C/T		0	109	ref		22.5352	71	ref		16.6667	90	C/T		1.9802	101	ref		5.35714	168
supercont1.1104:164119	G	A	Substitution	AAEL014411	AAEL014411-RA	P450	cytochrome P450 CYP304B3	NON_SYNONYMOUS_CODING	454	152	E>K		0.8789	0.88475	0.82039	-	-	-		0	96	ref		0	112	ref		0	122	ref		0	129	ref		0	74	ref		0	114	ref		0	113	ref		0	199
supercont1.1104:164154	G	A	Substitution	AAEL014411	AAEL014411-RA	P450	cytochrome P450 CYP304B3	SYNONYMOUS_CODING	489	163	L>L		0.78292	0.89957	0.90351	-	-	-		14.5455	110	ref		17.6	125	A/G		13.6986	146	A/G		0	149	ref		22.3301	103	ref		22.695	141	A/G		6.47482	139	ref		9.61538	208
supercont1.1104:164164	C	T	Substitution	AAEL014411	AAEL014411-RA	P450	cytochrome P450 CYP304B3	STOP_GAINED	499	167	R>Stop		0.86959	0.88879	0.87209	-	-	-		0	117	ref		0	128	ref		0	158	ref		0	133	ref		0	102	ref		0	145	ref		0	144	ref		0	227
supercont1.1104:164211	T	A	Substitution	AAEL014411	AAEL014411-RA	P450	cytochrome P450 CYP304B3	SYNONYMOUS_CODING	546	182	G>G		0.88181	0.90242	0.876	-	-	-		9.01639	122	ref		20.915	153	A/T		11.2903	186	A/T		0	159	ref		25	104	ref		22.9008	131	A/T		11.0294	136	A/T		8.96226	212
supercont1.1104:164217	G	T	Substitution	AAEL014411	AAEL014411-RA	P450	cytochrome P450 CYP304B3	SYNONYMOUS_CODING	552	184	V>V		0.8842	0.90199	0.90276	-	-	-		8.73016	126	ref		18.1208	149	G/T		10.7955	176	G/T		0	157	ref		21.4953	107	ref		20.9302	129	G/T		8.69565	138	ref		7.98122	213
supercont1.1104:164242	T	C	Substitution	AAEL014411	AAEL014411-RA	P450	cytochrome P450 CYP304B3	SYNONYMOUS_CODING	577	193	L>L		0.88521	0.89738	0.90295	-	-	-		3.92157	102	ref		10	130	C/T		4.86111	144	ref		0	114	ref		17.3913	69	ref		10.7143	112	C/T		4.80769	104	ref		3.76344	186
supercont1.1104:178569	T	C	Substitution	AAEL014411	AAEL014411-RA	P450	cytochrome P450 CYP304B3	SYNONYMOUS_CODING	705	235	I>I		0.88936	0.90072	0.90257	-	-	-		23.6842	76	ref		15.2174	92	C/T		14.9425	87	C/T		0	88	ref		30.5556	72	ref		35.8209	67	C/T		15.625	96	C/T		16.8	125
supercont1.1104:178594	G	A	Substitution	AAEL014411	AAEL014411-RA	P450	cytochrome P450 CYP304B3	NON_SYNONYMOUS_CODING	730	244	D>N		0.88834	0.87253	0.90056	-	-	-		0	80	ref		0	107	ref		0	97	ref		0	106	ref		8.33333	72	ref		9.09091	88	ref		4.9505	101	ref		1.3986	143
supercont1.1104:178626	T	C	Substitution	AAEL014411	AAEL014411-RA	P450	cytochrome P450 CYP304B3	SYNONYMOUS_CODING	762	254	I>I		0.88278	0.90331	0.90453	-	-	-		24.359	78	ref		16	100	C/T		18.1818	110	C/T		1.07527	93	ref		33.3333	90	C/T		39.1892	74	C/T		15.1515	99	C/T		20.9877	162
supercont1.1104:178648	C	A	Substitution	AAEL014411	AAEL014411-RA	P450	cytochrome P450 CYP304B3	NON_SYNONYMOUS_CODING	784	262	L>M		0.86959	0.90036	0.90458	-	-	-		15.8537	82	ref		16.8317	101	A/C		14.5299	117	A/C		0	93	ref		33.3333	96	A/C		45.5696	79	A/C		14.9425	87	A/C		17.7215	158
supercont1.1104:178664	A	G	Substitution	AAEL014411	AAEL014411-RA	P450	cytochrome P450 CYP304B3	NON_SYNONYMOUS_CODING	800	267	E>G		0.87978	0.89118	0.90266	-	-	-		0	96	ref		0	103	ref		0	116	ref		0	97	ref		0	116	ref		0	73	ref		0	93	ref		0	162
supercont1.1104:178720	C	T	Substitution	AAEL014411	AAEL014411-RA	P450	cytochrome P450 CYP304B3	SYNONYMOUS_CODING	856	286	L>L		0.85669	0.89564	0.90159	-	-	-		0	85	ref		0	98	ref		0	92	ref		0	92	ref		8.23529	85	ref		6.41026	78	ref		8.69565	92	ref		6.89655	145
supercont1.1104:178727	G	A	Substitution	AAEL014411	AAEL014411-RA	P450	cytochrome P450 CYP304B3	NON_SYNONYMOUS_CODING	863	288	R>Q		0.82791	0.89145	0.88056	-	-	-		0	81	ref		0	93	ref		0	76	ref		0	85	ref		14.2857	77	ref		10.9589	73	A/G		0	86	ref		0	129
supercont1.1104:178761	G	A	Substitution	AAEL014411	AAEL014411-RA	P450	cytochrome P450 CYP304B3	SYNONYMOUS_CODING	897	299	L>L		0.88863	0.89762	0.90433	-	-	-		6.89655	58	ref		16.0494	81	A/G		14.9254	67	A/G		0	70	ref		20	60	ref		39.6226	53	A/G		11.1111	63	A/G		16.1905	105
supercont1.1104:179041	T	C	Substitution	AAEL014411	AAEL014411-RA	P450	cytochrome P450 CYP304B3	SYNONYMOUS_CODING	975	325	G>G		0.86083	0.89824	0.90218	-	-	-		26.6667	45	ref		27.027	74	C/T		18.1818	66	C/T		0	73	ref		39.3939	66	C/T		42.8571	63	C/T		13.7931	58	C/T		17.7966	118
supercont1.1104:179074	G	A	Substitution	AAEL014411	AAEL014411-RA	P450	cytochrome P450 CYP304B3	SYNONYMOUS_CODING	1008	336	R>R		0.8911	0.89591	0.89851	-	-	-		14.2857	56	ref		26.4368	87	A/G		16.4384	73	A/G		0	82	ref		28.5714	70	ref		34.3284	67	A/G		7.93651	63	ref		10.2804	107
supercont1.1104:179110	A	G	Substitution	AAEL014411	AAEL014411-RA	P450	cytochrome P450 CYP304B3	SYNONYMOUS_CODING	1044	348	Q>Q		0.88707	0.90145	0.88667	-	-	-		12.5	40	ref		16.6667	66	A/G		5.88235	68	ref		0	80	ref		22.9167	48	ref		26	50	A/G		6.89655	58	ref		4.54545	88
supercont1.1104:179124	G	A	Substitution	AAEL014411	AAEL014411-RA	P450	cytochrome P450 CYP304B3	NON_SYNONYMOUS_CODING	1058	353	G>E		0.84415	0.89824	0.89502	-	-	-		8.33333	36	ref		11.5942	69	A/G		1.47059	68	ref		0	75	ref		23.8095	42	ref		25.5319	47	A/G		6.25	64	ref		5	80
supercont1.1104:179134	A	T	Substitution	AAEL014411	AAEL014411-RA	P450	cytochrome P450 CYP304B3	SYNONYMOUS_CODING	1068	356	G>G		0.85953	0.89636	0.89703	-	-	-		3.33333	30	ref		10.3448	58	ref		4.61538	65	ref		0	58	ref		18.9189	37	ref		23.0769	39	A/T		8.33333	72	ref		6.75676	74
supercont1.1104:179152	T	A	Substitution	AAEL014411	AAEL014411-RA	P450	cytochrome P450 CYP304B3	SYNONYMOUS_CODING	1086	362	T>T		0.88963	0.90242	0.89828	-	-	-		4.87805	41	ref		20	55	A/T		6.06061	66	ref		0	57	ref		29.0323	31	ref		32.5	40	A/T		14.2857	77	A/T		6.57895	76
supercont1.1104:179194	A	T	Substitution	AAEL014411	AAEL014411-RA	P450	cytochrome P450 CYP304B3	SYNONYMOUS_CODING	1128	376	L>L		0.88589	0.90022	0.90032	-	-	-		12.069	58	ref		26.2295	61	A/T		7.93651	63	ref		0	63	ref		26.3158	57	ref		39.5833	48	A/T		10.989	91	A/T		10.4651	86
supercont1.1104:179224	T	C	Substitution	AAEL014411	AAEL014411-RA	P450	cytochrome P450 CYP304B3	SYNONYMOUS_CODING	1158	386	V>V		0.84198	0.89685	0.88592	-	-	-		15.7895	57	ref		15.2542	59	C/T		1.92308	52	ref		0	69	ref		19.5652	46	ref		23.0769	52	C/T		4.05405	74	ref		5.68182	88
supercont1.1104:179228	T	A	Substitution	AAEL014411	AAEL014411-RA	P450	cytochrome P450 CYP304B3	NON_SYNONYMOUS_CODING	1162	388	S>T		0.8767	0.8712	0.87478	-	-	-		0	53	ref		0	58	ref		0	55	ref		0	69	ref		0	40	ref		0	53	ref		0	75	ref		0	89
supercont1.1104:179239	C	T	Substitution	AAEL014411	AAEL014411-RA	P450	cytochrome P450 CYP304B3	SYNONYMOUS_CODING	1173	391	S>S		0.88308	0.89278	0.88113	-	-	-		13.5593	59	ref		7.84314	51	ref		1.92308	52	ref		0	75	ref		12.2449	49	ref		17.6471	51	C/T		2.53165	79	ref		4.5977	87
supercont1.1104:179278	T	C	Substitution	AAEL014411	AAEL014411-RA	P450	cytochrome P450 CYP304B3	SYNONYMOUS_CODING	1212	404	D>D		0.86559	0.88714	0.89234	-	-	-		3.44828	58	ref		1.53846	65	ref		0	76	ref		0	83	ref		2	50	ref		6	50	ref		4.21053	95	ref		0.909091	110
supercont1.1104:179281	C	T	Substitution	AAEL014411	AAEL014411-RA	P450	cytochrome P450 CYP304B3	SYNONYMOUS_CODING	1215	405	I>I		0.86959	0.89762	0.89218	-	-	-		1.6129	62	ref		3.07692	65	ref		1.28205	78	ref		0	90	ref		9.25926	54	ref		11.3208	53	ref		2.04082	98	ref		0.909091	110
supercont1.1104:179311	A	G	Substitution	AAEL014411	AAEL014411-RA	P450	cytochrome P450 CYP304B3	SYNONYMOUS_CODING	1245	415	L>L		0.86333	0.89674	0.90344	-	-	-		8.04598	87	ref		10.1266	79	ref		7.14286	98	ref		0	95	ref		28.3333	60	ref		24.5902	61	A/G		6.54206	107	ref		4.8	125
supercont1.1104:179356	C	T	Substitution	AAEL014411	AAEL014411-RA	P450	cytochrome P450 CYP304B3	SYNONYMOUS_CODING	1290	430	N>N		0.89269	0.89786	0.90075	-	-	-		6.31579	95	ref		16.4384	73	C/T		7.95455	88	ref		0	82	ref		25.7576	66	ref		22.973	74	C/T		3.40909	88	ref		5.04202	119
supercont1.1104:179368	G	A	Substitution	AAEL014411	AAEL014411-RA	P450	cytochrome P450 CYP304B3	SYNONYMOUS_CODING	1302	434	E>E		0.8492	0.90262	0.90266	-	-	-		4.10959	73	ref		10.6061	66	ref		4.7619	84	ref		0	68	ref		18.9655	58	ref		21.9178	73	A/G		10.8108	74	A/G		9.00901	111
supercont1.1104:179373	T	G	Substitution	AAEL014411	AAEL014411-RA	P450	cytochrome P450 CYP304B3	NON_SYNONYMOUS_CODING	1307	436	F>C		0.8842	0.88897	0.88439	-	-	-		0	78	ref		0	73	ref		0	89	ref		0	70	ref		0	67	ref		0	74	ref		5.71429	70	ref		10.6195	113
[truncated: 28,911 more rows]
[truncated: 16 more columns]
