# Supplementary material for: Identifying genomic changes associated with insecticide resistance in the dengue mosquito Aedes aegypti by deep targeted sequencing
Source: HighWire-hosted journal article supplement (doi:10.1101/gr.189225.115), 2015-07-23
Supplement: Supplemental_Table_5_captured_genes.xlsx [file Supplemental_Table_5_captured_genes.xlsx]

## Sheet: Feuil1
Supplementary Table 4. Description and location of all captured genes
Ensembl ID	Description	Biological category	Supercontig	gene start (bp)	strand
AAEL000004	glycosyltransferase	UGT	1.1	2714033	-
AAEL000085	pupal cuticle protein	Cuticle	1.1	2999015	-
AAEL000092	glutathione transferase GSTX1	GST	1.1	2360773	+
AAEL000242	voltage-gated potassium channel	Ion channel	1.4	3588768	+
AAEL000259	Cu-Zn superoxide dismutase CUSOD4	Red/Ox	1.5	1364141	+
AAEL000274	Cu-Zn Superoxide Dismutase	Red/Ox	1.5	1342653	+
AAEL000320	cytochrome P450 CYP325T1	P450	1.6	4030559	-
AAEL000325	cytochrome P450 CYP325C?	P450	1.6	3997728	+
AAEL000326	cytochrome P450 CYP325S1	P450	1.6	3957227	+
AAEL000338	cytochrome P450 CYP325E3	P450	1.6	4121636	+
AAEL000340	cytochrome P450 CYP325H?	P450	1.6	4540907	-
AAEL000357	cytochrome P450 CYP325S3	P450	1.6	3965717	+
AAEL000389	brain chitinase and chia	Cuticle	1.7	187195	-
AAEL000438	epoxide hydrolase	Other detox	1.8	1152651	+
AAEL000466	voltage and ligand gated potassium channel	Ion channel	1.8	3484244	-
AAEL000477	NADPH FAD oxidoreductase	Other detox	1.9	3829881	-
AAEL000495	glutathione peroxidase GPXH3	Red/Ox	1.9	4013476	-
AAEL000502	NADPH FAD oxidoreductase	Other detox	1.9	3796669	+
AAEL000559	glycosyltransferase	UGT	1.1	944406	+
AAEL000665	adult cuticle protein	Cuticle	1.13	3985858	+
AAEL000687	glycosyltransferase	UGT	1.14	1402752	-
AAEL000765	hexamerin 2 beta	Other	1.16	283224	+
AAEL000797	dimethylaniline monooxygenase	Other detox	1.17	2432356	+
AAEL000813	dimethylaniline monooxygenase	Other detox	1.17	2415901	-
AAEL000820	dimethylaniline monooxygenase	Other detox	1.17	2416164	+
AAEL000829	dimethylaniline monooxygenase	Other detox	1.17	2398537	-
AAEL000834	dimethylaniline monooxygenase	Other detox	1.17	2444007	-
AAEL000839	O-fucosyltransferase	Other detox	1.17	2554889	+
AAEL000878	cuticle protein	Cuticle	1.18	3471086	-
AAEL000879	cuticle protein	Cuticle	1.18	3454982	+
AAEL000899	glycosyltransferase	UGT	1.18	3098422	+
AAEL001048	short-chain dehydrogenase	Other detox	1.21	2315583	-
AAEL001054	glutathione transferase GSTD4	GST	1.22	1422025	-
AAEL001059	glutathione transferase GSTD3	GST	1.22	1423350	+
AAEL001061	glutathione transferase GSTD1	GST	1.22	2945238	-
AAEL001071	glutathione transferase GSTD5	GST	1.22	2894345	-
AAEL001078	glutathione transferase GSTD2	GST	1.22	2943779	+
AAEL001090	glutathione transferase GSTD7	GST	1.22	3006707	-
AAEL001101	ABC transporter	ABC transporter	1.23	2940742	-
AAEL001288	cytochrome P450 CYP9M?	P450	1.29	3446369	+
AAEL001292	cytochrome P450 CYP9M7	P450	1.29	3480386	+
AAEL001312	cytochrome P450 CYP9M6	P450	1.29	3467135	+
AAEL001320	cytochrome P450 CYP9M4	P450	1.29	3417178	-
AAEL001364	glycosyltransferase	UGT	1.31	2958510	+
AAEL001365	glycosyltransferase	UGT	1.31	2993038	+
AAEL001427	short-chain dehydrogenase	Other detox	1.32	3550441	-
AAEL001461	oxidoreductase	Other detox	1.33	891914	-
AAEL001517	carboxylesterase	CCE	1.35	895333	+
AAEL001532	FAD NAD binding oxidoreductases	Other detox	1.35	1685068	+
AAEL001533	glycosyltransferase	UGT	1.35	1641880	-
AAEL001542	voltage and ligand gated potassium channel	Ion channel	1.36	717075	+
AAEL001548	glycosyltransferase	UGT	1.36	3006437	+
AAEL001586	glycosyltransferase	UGT	1.36	2994808	+
AAEL001632	multicopper oxidase	Other detox	1.38	109302	+
AAEL001640	multicopper oxidase	Other detox	1.38	195168	-
AAEL001667	multicopper oxidase	Other detox	1.38	74106	-
AAEL001672	multicopper oxidase	Other detox	1.38	230803	-
AAEL001735	pupal cuticle protein	Cuticle	1.41	8233	+
AAEL001743	pupal cuticle protein	Cuticle	1.41	24477	+
AAEL001752	chloride channel protein 3	Ion channel	1.42	2232899	+
AAEL001768	short-chain dehydrogenase	Other detox	1.42	2311431	-
AAEL001807	cytochrome P450 CYP9M9	P450	1.43	1092354	-
AAEL001816	glycosyltransferase	UGT	1.43	774247	+
AAEL001822	glycosyltransferase	UGT	1.43	894624	+
AAEL001845	short-chain dehydrogenase	Other detox	1.44	2970126	+
AAEL001872	voltage-dependent anion-selective channel	Ion channel	1.44	689818	-
AAEL001938	ABC transporter	ABC transporter	1.46	792391	-
AAEL001960	cytochrome P450 CYP12F?	P450	1.47	253707	+
AAEL002005	cytochrome P450 CYP12F6	P450	1.47	263736	+
AAEL002031	cytochrome P450 CYP12F7	P450	1.47	274782	-
AAEL002039	NADPH oxidase	Other detox	1.47	884453	-
AAEL002043	cytochrome P450 CYP305A5	P450	1.48	2217491	-
AAEL002046	cytochrome P450 CYP6CB1	P450	1.48	807549	+
AAEL002067	cytochrome P450 CYP15B?	P450	1.48	2254692	+
AAEL002071	cytochrome P450 CYP305A6	P450	1.48	2240445	-
AAEL002085	cytochrome P450 CYP4H31	P450	1.48	89394	+
AAEL002088	sodium channel, auxiliary protein	Ion channel	1.49	2361752	+
AAEL002092	cuticle protein	Cuticle	1.49	2156080	+
AAEL002099	cuticle protein	Cuticle	1.49	2148089	+
AAEL002110	cuticle protein	Cuticle	1.49	2099057	-
AAEL002111	cuticle protein	Cuticle	1.49	2072648	-
AAEL002181	cuticle protein	Cuticle	1.51	1124233	-
AAEL002185	cuticle protein	Cuticle	1.51	1049861	+
AAEL002191	cuticle protein	Cuticle	1.51	1301465	-
AAEL002197	cuticle protein	Cuticle	1.51	1219842	-
AAEL002211	cuticle protein	Cuticle	1.51	1292147	+
AAEL002212	cuticle protein	Cuticle	1.51	1176515	+
AAEL002229	cuticle protein	Cuticle	1.51	1280819	-
AAEL002231	cuticle protein	Cuticle	1.51	1401721	+
AAEL002241	cuticle protein	Cuticle	1.51	1322802	-
AAEL002246	cuticle protein	Cuticle	1.51	1370838	-
AAEL002274	hypothetical protein	Other	1.52	1359770	+
AAEL002309	thioredoxin Peroxidase TPX4	Red/Ox	1.53	1817925	-
AAEL002354	heme peroxidase HPX5	Red/Ox	1.54	1785919	-
AAEL002367	carboxy/choline esterase CCEAE1B	CCE	1.55	45760	+
AAEL002385	carboxy/choline esterase CCEAE3B	CCE	1.55	88420	+
AAEL002416	short-chain dehydrogenase	Other detox	1.56	2467432	+
AAEL002440	larval cuticle protein	Cuticle	1.57	2687301	-
AAEL002441	larval cuticle protein	Cuticle	1.57	2331413	+
AAEL002452	larval cuticle protein	Cuticle	1.57	2680857	+
AAEL002458	pupal cuticle protein	Cuticle	1.57	2348081	+
AAEL002493	short-chain dehydrogenase	Other detox	1.58	138829	-
AAEL002633	cytochrome P450 CYP9J31	P450	1.62	2899491	-
AAEL002638	cytochrome P450 CYP9J6	P450	1.62	2906757	+
AAEL002683	aldehyde oxidase	Other detox	1.64	2715031	-
AAEL002688	glycosyltransferase	UGT	1.64	2604604	-
AAEL002718	chitin synthase	Cuticle	1.65	1714349	-
AAEL002872	cytochrome P450 CYP6Z?	P450	1.7	2501327	-
AAEL002886	thioredoxin reductase	Red/Ox	1.71	1067969	-
AAEL002893	short-chain dehydrogenase	Other detox	1.71	1377009	+
AAEL002901	short-chain dehydrogenase	Other detox	1.71	1088791	+
AAEL002959	brain chitinase and chia	Cuticle	1.73	1956530	-
AAEL002964	brain chitinase and chia	Cuticle	1.73	1962730	-
AAEL002969	brain chitinase and chia	Cuticle	1.73	1948037	-
AAEL002972	brain chitinase and chia	Cuticle	1.73	1985168	-
AAEL003003	glutamate-gated chloride channel	Ion channel	1.74	819897	+
AAEL003049	pupal cuticle protein 78E	Cuticle	1.75	704573	-
AAEL003056	brain chitinase and chia	Cuticle	1.76	2010213	-
AAEL003058	glycosyltransferase	UGT	1.76	555001	-
AAEL003066	brain chitinase and chia	Cuticle	1.76	1946585	-
AAEL003076	glycosyltransferase	UGT	1.76	599923	+
AAEL003079	glycosyltransferase	UGT	1.76	521083	-
AAEL003091	glycosyltransferase	UGT	1.76	542639	+
AAEL003098	glycosyltransferase	UGT	1.77	2312928	+
AAEL003099	glycosyltransferase	UGT	1.77	2329524	+
AAEL003102	glycosyltransferase	UGT	1.77	2316475	+
AAEL003139	short-chain dehydrogenase	Other detox	1.79	2262717	-
AAEL003148	short-chain dehydrogenase	Other detox	1.79	2247515	-
AAEL003154	aldo-keto reductase	Other detox	1.8	1632519	+
AAEL003181	carboxy/choline esterase CCEAE3C	CCE	1.81	2517477	-
AAEL003183	oxidoreductase	Other detox	1.81	2370792	+
AAEL003187	carboxy/choline esterase CCEAE4C	CCE	1.81	2519390	-
AAEL003195	carboxy/choline esterase CCEAE1C	CCE	1.81	2496503	-
AAEL003196	carboxy/choline esterase CCEAE2C	CCE	1.81	2503930	-
AAEL003198	carboxy/choline esterase CCEAE6C	CCE	1.81	2536767	+
AAEL003201	carboxy/choline esterase CCEAE5C	CCE	1.81	2522171	-
AAEL003221	pupal cuticle protein	Cuticle	1.82	365983	-
AAEL003226	pupal cuticle protein	Cuticle	1.82	172138	+
AAEL003239	pupal cuticle protein	Cuticle	1.82	1881099	+
AAEL003242	pupal cuticle protein	Cuticle	1.82	375058	+
AAEL003259	pupal cuticle protein	Cuticle	1.82	349250	+
AAEL003272	pupal cuticle protein	Cuticle	1.82	137019	+
AAEL003349	NADPH cytochrome P450 reductase	Other detox	1.84	2837320	-
AAEL003380	cytochrome P450 CYP4H28	P450	1.85	2653362	+
AAEL003399	cytochrome P450 CYP4H30	P450	1.85	2600598	-
AAEL003481	glycosyltransferase	UGT	1.87	949695	+
AAEL003545	carboxylesterase	CCE	1.89	1056137	-
AAEL003617	alcohol dehydrogenase	Other detox	1.93	384561	-
AAEL003621	pupal cuticle protein	Cuticle	1.93	2378681	+
AAEL003748	cytochrome P450 CYP9AE1	P450	1.96	949503	+
AAEL003763	cytochrome P450 CYP329B1	P450	1.96	930051	+
AAEL003831	fatty acid hydroxylase	Other detox	1.98	1781303	-
AAEL003890	cytochrome P450 CYP6AG?	P450	1.99	1705541	+
AAEL003933	oxidase, two peroxidase domains DBLOX	Other detox	1.101	651653	-
AAEL003958	neurotransmitter gated ion channel	Ion channel	1.102	2581611	+
AAEL003959	short-chain dehydrogenase	Other detox	1.102	2263188	-
AAEL003961	short-chain dehydrogenase	Other detox	1.102	2302227	+
AAEL003991	alcohol dehydrogenase	Other detox	1.104	447343	-
AAEL004006	acetylcholine receptor protein alpha	Synaptic receptor	1.105	665545	-
AAEL004012	cytochrome P450 CYP325AA1	P450	1.105	131565	-
AAEL004032	acetylcholine receptor protein alpha	Synaptic receptor	1.105	1076761	+
AAEL004054	cytochrome P450 CYP4G36	P450	1.106	789854	-
AAEL004061	acetylcholine receptor protein alpha	Synaptic receptor	1.106	1710798	+
AAEL004086	aldo-keto reductase	Other detox	1.107	2110853	+
AAEL004088	aldo-keto reductase	Other detox	1.107	2167385	+
AAEL004095	aldo-keto reductase	Other detox	1.107	2112447	+
AAEL004096	aldo-keto reductase	Other detox	1.107	2162628	+
AAEL004102	aldo-keto reductase	Other detox	1.107	2129481	-
AAEL004112	thioredoxin Peroxidase TPX2	Red/Ox	1.107	2094566	-
AAEL004118	aldo-keto reductase	Other detox	1.107	2116046	+
AAEL004126	sterol desaturase	Other detox	1.108	2082050	-
AAEL004135	sterol desaturase	Other detox	1.108	2058526	-
AAEL004163	o-fucosyltransferase	Other detox	1.109	1865348	-
AAEL004180	hypothetical protein	Other	1.109	1947761	-
AAEL004222	voltage-dependent p/q type calcium channel	Ion channel	1.11	1346510	-
AAEL004229	glutathione transferase GSTT4	GST	1.111	1449448	+
AAEL004273	short-chain dehydrogenase	Other detox	1.113	1568109	+
AAEL004281	short-chain dehydrogenase	Other detox	1.113	1544602	+
AAEL004323	carboxy/choline esterase CCEJHE2O	CCE	1.114	639075	+
AAEL004331	ABC transporter	ABC transporter	1.115	240545	+
AAEL004341	carboxy/choline esterase CCEAE1O	CCE	1.115	1720879	-
AAEL004386	heme peroxidase HPX8C	Red/Ox	1.117	347261	+
AAEL004388	heme peroxidase HPX8A	Red/Ox	1.117	362285	-
AAEL004390	heme peroxidase HPX8B	Red/Ox	1.117	315924	+
AAEL004401	heme peroxidase HPX7	Red/Ox	1.117	291591	-
AAEL004450	cytochrome b5	Other detox	1.12	927845	+
AAEL004513	neurotransmitter gated ion channel	Ion channel	1.122	1649812	-
AAEL004557	sulfotransferase	Other detox	1.123	1122737	-
AAEL004579	short-chain dehydrogenase	Other detox	1.123	2269427	-
AAEL004671	(s)-2-hydroxy-acid oxidase	Other detox	1.126	770401	+
AAEL004674	pupal cuticle protein	Cuticle	1.126	465611	-
AAEL004676	(s)-2-hydroxy-acid oxidase	Other detox	1.126	2126504	+
AAEL004677	(s)-2-hydroxy-acid oxidase	Other detox	1.126	797661	+
AAEL004742	pupal cuticle protein	Cuticle	1.129	159261	-
AAEL004743	ABC transporter	ABC transporter	1.129	974609	+
AAEL004745	pupal cuticle protein	Cuticle	1.129	347099	+
AAEL004747	pupal cuticle protein	Cuticle	1.129	234785	+
AAEL004748	pupal cuticle protein	Cuticle	1.129	189713	-
AAEL004749	pupal cuticle protein	Cuticle	1.129	407263	+
AAEL004751	pupal cuticle protein	Cuticle	1.129	327899	+
AAEL004752	pupal cuticle protein	Cuticle	1.129	221532	+
AAEL004758	pupal cuticle protein	Cuticle	1.129	423863	-
AAEL004759	pupal cuticle protein	Cuticle	1.129	261083	+
AAEL004760	pupal cuticle protein	Cuticle	1.129	139145	-
AAEL004762	pupal cuticle protein	Cuticle	1.129	76716	+
AAEL004764	pupal cuticle protein	Cuticle	1.129	146020	-
AAEL004765	pupal cuticle protein	Cuticle	1.129	190868	+
AAEL004769	pupal cuticle protein	Cuticle	1.129	297371	+
AAEL004771	pupal cuticle protein	Cuticle	1.129	227834	-
AAEL004772	pupal cuticle protein	Cuticle	1.129	239585	-
AAEL004776	pupal cuticle protein	Cuticle	1.129	102637	+
AAEL004780	pupal cuticle protein	Cuticle	1.129	280071	+
AAEL004782	pupal cuticle protein	Cuticle	1.129	249459	-
AAEL004823	Mn-Fe superoxide dismutase MNSOD1	Red/Ox	1.131	1608231	+
AAEL004870	cytochrome P450 CYP18A1	P450	1.133	2236639	+
AAEL004888	cytochrome P450 CYP306A1	P450	1.133	2250253	-
AAEL004897	brain chitinase and chia	Cuticle	1.134	1842424	-
AAEL004923	nicotinic acetylcholine receptor	Synaptic receptor	1.135	2029510	-
AAEL004935	nicotinic acetylcholine receptor	Synaptic receptor	1.135	2072704	+
AAEL004941	cytochrome P450 CYP6AK1	P450	1.136	819331	-
AAEL004974	glycosyltransferase	UGT	1.137	1449053	-
AAEL005006	cytochrome P450 CYP6CD1	P450	1.138	49532	+
AAEL005030	ABC transporter	ABC transporter	1.139	1233513	-
AAEL005101	carboxy/choline esterase CCEAE4A	CCE	1.142	547365	-
AAEL005108	Mn-Fe superoxide dismutase MNSOD2	Red/Ox	1.142	1933644	-
AAEL005112	carboxy/choline esterase CCEAE3A	CCE	1.142	531116	+
AAEL005113	carboxy/choline esterase CCEAE1A	CCE	1.142	469538	-
AAEL005122	carboxy/choline esterase CCEAE6A	CCE	1.142	559829	-
AAEL005138	glycosyltransferase	UGT	1.143	1344095	-
AAEL005182	carboxy/choline esterase CCEJHE4F	CCE	1.145	734401	+
AAEL005198	carboxy/choline esterase CCEJHE2F	CCE	1.145	805698	+
AAEL005210	carboxy/choline esterase CCEJHE3F	CCE	1.145	779390	-
AAEL005375	glycosyltransferase	UGT	1.153	1645120	+
AAEL005416	oxidase/peroxidase	Other detox	1.155	390748	+
AAEL005468	glycosyltransferase	UGT	1.158	969968	-
AAEL005491	ABC transporter	ABC transporter	1.159	901905	+
AAEL005499	ABC transporter	ABC transporter	1.16	1362499	-
AAEL005618	chitin synthase	Cuticle	1.165	344391	-
AAEL005684	chitinase	Cuticle	1.17	968038	-
AAEL005695	cytochrome P450 CYP325X1	P450	1.17	557640	+
AAEL005696	cytochrome P450 CYP325X2	P450	1.17	578367	+
AAEL005700	cytochrome P450 CYP325X4	P450	1.17	655243	+
AAEL005703	short-chain dehydrogenase	Other detox	1.17	890854	+
AAEL005771	cytochrome P450 CYP325K2	P450	1.174	836191	+
AAEL005775	cytochrome P450 CYP325R1	P450	1.174	124225	-
AAEL005788	cytochrome P450 CYP325K3	P450	1.174	846791	-
AAEL005903	glycosyltransferase	UGT	1.179	743889	+
AAEL005918	ABC transporter	ABC transporter	1.18	663880	-
AAEL005929	ABC transporter	ABC transporter	1.18	786121	+
AAEL005937	ABC transporter	ABC transporter	1.18	711724	+
AAEL005942	chloride channel protein 2	Ion channel	1.181	1372060	-
AAEL005950	chloride channel protein 2	Ion channel	1.181	1209453	-
AAEL005954	chloride channel protein 2	Ion channel	1.181	1399216	+
AAEL005958	oxidoreductase	Other detox	1.182	1902682	-
AAEL005990	adrenodoxin reductase	Other detox	1.184	503081	-
AAEL006014	heme peroxidase HPX1	Red/Ox	1.186	745021	+
AAEL006019	voltage-gated sodium channel (kdr mutations)	Ion channel	1.186	18685	+
AAEL006044	cytochrome P450 CYP325Q1	P450	1.187	209424	-
AAEL006058	cytochrome P450 CYP325Q2	P450	1.187	240140	+
AAEL006081	NADPH fad oxidoreductase	Other detox	1.188	1850663	-
AAEL006147	brain chitinase and chia	Cuticle	1.191	1545969	-
AAEL006157	aldehyde oxidase	Other detox	1.192	1744723	+
AAEL006163	aldehyde oxidase	Other detox	1.192	1732804	+
AAEL006224	short-chain dehydrogenase	Other detox	1.195	360121	+
AAEL006254	glycosyltransferase	UGT	1.197	789695	+
AAEL006257	cytochrome P450 CYP325Y1	P450	1.197	203445	+
AAEL006271	superoxide dismutase CUSOD2	Red/Ox	1.198	751008	-
AAEL006317	short-chain dehydrogenase	Other detox	1.2	1558364	-
AAEL006318	short-chain dehydrogenase	Other detox	1.2	910462	-
AAEL006327	sulfotransferase	Other detox	1.201	1261249	+
AAEL006334	sulfotransferase	Other detox	1.201	1255048	+
AAEL006338	sulfotransferase	Other detox	1.201	1253037	+
AAEL006342	epoxide hydrolase	Other detox	1.201	1484807	+
AAEL006344	sulfotransferase	Other detox	1.201	1240921	+
AAEL006353	sulfotransferase	Other detox	1.201	1238364	+
AAEL006354	epoxide hydrolase	Other detox	1.201	1458908	+
AAEL006359	sulfotransferase	Other detox	1.201	1244442	+
AAEL006458	alcohol dehydrogenase	Other detox	1.206	403923	+
AAEL006467	alcohol dehydrogenase	Other detox	1.206	480261	-
AAEL006471	alcohol dehydrogenase	Other detox	1.206	376620	-
AAEL006583	multicopper oxidase	Other detox	1.211	1028037	-
AAEL006622	ABC transporter	ABC transporter	1.213	838086	+
AAEL006650	potassium channel beta	Ion channel	1.215	282360	+
AAEL006717	ABC transporter	ABC transporter	1.219	178154	-
AAEL006733	FAD NADPH dehydrogenase	Other detox	1.219	1520432	+
AAEL006739	adult cuticle protein	Cuticle	1.219	10715	+
AAEL006764	glutathione transferase GSTD10	GST	1.22	1465735	-
AAEL006784	cytochrome P450 CYP9J17	P450	1.221	317721	-
AAEL006793	cytochrome P450 CYP9J9	P450	1.221	351924	+
AAEL006795	cytochrome P450 CYP9J15	P450	1.221	299119	+
AAEL006798	cytochrome P450 CYP9J10	P450	1.221	373452	+
AAEL006802	cytochrome P450 CYP9J22	P450	1.221	414936	+
AAEL006805	cytochrome P450 CYP9J2	P450	1.221	331350	-
AAEL006809	voltage-gated ion channel	Ion channel	1.221	1391971	-
AAEL006811	cytochrome P450 CYP9J8	P450	1.221	390698	+
AAEL006814	cytochrome P450 CYP9J20	P450	1.221	400799	+
AAEL006815	cytochrome P450 CYP9J16	P450	1.221	309178	+
AAEL006818	glutathione S-transferase microsomal	GST	1.222	599794	+
AAEL006824	cytochrome P450 CYP4G?	P450	1.222	1615071	-
AAEL006827	cytochrome P450 CYP12F8	P450	1.222	1065162	+
AAEL006829	glutathione S-transferase microsomal	GST	1.222	597909	+
AAEL006874	prophenoloxidase	PPO	1.224	1728258	-
AAEL006875	cytochrome P450 CYP307B1	P450	1.224	12433	-
AAEL006877	prophenoloxidase	PPO	1.224	1695961	-
AAEL006984	cytochrome P450 CYP6AG5	P450	1.231	770944	-
AAEL006989	cytochrome P450 CYP6AG7	P450	1.231	800120	-
AAEL006992	cytochrome P450 CYP6AG6	P450	1.231	784874	-
AAEL007010	cytochrome P450 CYP6AG4	P450	1.231	894403	+
AAEL007024	cytochrome P450 CYP6AG3	P450	1.231	838998	+
AAEL007085	adult cuticle protein	Cuticle	1.235	463949	+
AAEL007095	adult cuticle protein	Cuticle	1.235	977585	+
AAEL007101	adult cuticle protein	Cuticle	1.235	1013882	+
AAEL007104	voltage-gated potassium channel	Ion channel	1.236	557197	+
AAEL007143	voltage-gated potassium channel	Ion channel	1.239	1088288	-
AAEL007146	voltage-gated potassium channel	Ion channel	1.239	747016	-
AAEL007192	pupal cuticle protein	Cuticle	1.242	809483	-
AAEL007194	pupal cuticle protein	Cuticle	1.242	783335	-
AAEL007275	aldo-keto reductase	Other detox	1.246	1459863	-
AAEL007308	glycosyltransferase	UGT	1.247	1269427	-
AAEL007372	GPCR GABA B Family GPRGBB1	Other	1.251	707259	+
AAEL007413	sulfotransferase	Other detox	1.255	358045	-
AAEL007415	multicopper oxidase	Other detox	1.255	304319	+
AAEL007421	sulfotransferase	Other detox	1.255	354801	-
AAEL007473	cytochrome P450 CYP6AH1	P450	1.257	1300744	+
AAEL007486	carboxy/choline esterase CCEAE20	CCE	1.258	667743	+
AAEL007547	chloride channel protein	Ion channel	1.262	43972	+
AAEL007560	galactosyltransferase	Other detox	1.263	1191348	-
AAEL007563	oxidase, peroxidase and NADPH-oxidasedomains DUOX	Other detox	1.263	965300	-
AAEL007664	nicotinic acetylcholine receptor	Synaptic receptor	1.272	720386	+
AAEL007669	oxidoreductase	Other detox	1.272	166006	+
AAEL007709	GPCR GABA B Family GPRGBB3	Other	1.275	1256535	+
AAEL007739	pupal cuticle protein	Cuticle	1.277	955624	-
AAEL007741	sterol desaturase	Other detox	1.278	945558	-
AAEL007761	chloride intracellular channel	Ion channel	1.278	1264431	-
AAEL007770	voltage and ligand gated potassium channel	Ion channel	1.279	577550	-
AAEL007795	cytochrome P450 CYP4D37	P450	1.283	1249397	+
AAEL007798	cytochrome P450 CYP4K3	P450	1.283	1376894	+
AAEL007802	multicopper oxidase	Other detox	1.283	261158	+
AAEL007807	cytochrome P450 CYP4D38	P450	1.283	1293426	+
AAEL007808	cytochrome P450 CYP4D39	P450	1.283	1326305	-
AAEL007811	short-chain dehydrogenase	Other detox	1.283	1419000	+
AAEL007812	cytochrome P450 CYP4H32	P450	1.283	1149631	-
AAEL007815	cytochrome P450 CYP4D24	P450	1.283	1359938	-
AAEL007816	cytochrome P450 CYP4D23	P450	1.283	1221965	-
AAEL007830	cytochrome P450 CYP4H29	P450	1.285	381965	-
AAEL007893	short chain type dehydrogenase	Other detox	1.288	703192	-
AAEL007906	hypothetical protein	Other	1.288	1007564	+
AAEL007913	sulfotransferase	Other detox	1.288	879769	-
AAEL007946	glutathione transferase GSTE6	GST	1.291	946165	-
AAEL007947	glutathione transferase GSTE3	GST	1.291	947166	-
AAEL007948	glutathione transferase GSTE7	GST	1.291	928081	-
AAEL007951	glutathione transferase GSTE2	GST	1.291	920522	+
AAEL007954	glutathione transferase GSTE1	GST	1.291	896204	+
AAEL007955	glutathione transferase GSTE8	GST	1.291	894246	-
AAEL007962	glutathione transferase GSTE4	GST	1.291	910773	-
AAEL007964	glutathione transferase GSTE5	GST	1.291	927236	+
AAEL007982	glycosyltransferase	UGT	1.292	623180	+
AAEL008016	short-chain dehydrogenase	Other detox	1.295	1231593	+
AAEL008017	cytochrome P450 CYP4C50	P450	1.295	69137	-
AAEL008018	cytochrome P450 CYP4C51	P450	1.295	158559	-
AAEL008023	cytochrome P450 CYP4C52	P450	1.295	203230	-
AAEL008040	brain chitinase and chia	Cuticle	1.297	725984	+
AAEL008045	hexamerin 2 beta	Other	1.297	404472	+
AAEL008055	nicotinic acetylcholine receptor	Synaptic receptor	1.299	283348	-
AAEL008134	ABC transporter	ABC transporter	1.302	73729	+
AAEL008138	ABC transporter	ABC transporter	1.303	412767	+
AAEL008152	short-chain dehydrogenase	Other detox	1.304	1024386	-
AAEL008159	short-chain dehydrogenase	Other detox	1.304	1071157	+
AAEL008225	short-chain dehydrogenase	Other detox	1.307	48718	-
AAEL008227	short-chain dehydrogenase	Other detox	1.307	274818	-
AAEL008251	larval cuticle protein	Cuticle	1.309	235354	-
AAEL008284	pupal cuticle protein	Cuticle	1.311	508436	+
AAEL008285	pupal cuticle protein	Cuticle	1.311	694798	+
AAEL008288	pupal cuticle protein	Cuticle	1.311	507412	-
AAEL008289	pupal cuticle protein	Cuticle	1.311	853289	+
AAEL008293	pupal cuticle protein	Cuticle	1.311	562308	-
AAEL008294	pupal cuticle protein	Cuticle	1.311	545220	+
AAEL008295	pupal cuticle protein	Cuticle	1.311	493025	-
AAEL008297	sodium channel protein para	Ion channel	1.312	61716	+
AAEL008345	cytochrome P450 CYP4G35	P450	1.318	83305	-
AAEL008354	gaba receptor	Synaptic receptor	1.319	989957	-
AAEL008384	ABC transporter	ABC transporter	1.321	675803	-
AAEL008386	ABC transporter	ABC transporter	1.321	698372	-
AAEL008388	ABC transporter	ABC transporter	1.321	644598	-
AAEL008397	glutathione peroxidase GPXH2	Red/Ox	1.322	75302	-
AAEL008560	glycosyltransferase	UGT	1.332	267968	+
AAEL008568	glycosyltransferase	UGT	1.332	249038	+
AAEL008624	ABC transporter	ABC transporter	1.337	22919	-
AAEL008625	ABC transporter	ABC transporter	1.337	119628	+
AAEL008627	ABC transporter	ABC transporter	1.337	8815	-
AAEL008628	ABC transporter	ABC transporter	1.337	89533	-
AAEL008629	ABC transporter	ABC transporter	1.337	131034	-
AAEL008631	ABC transporter	ABC transporter	1.337	276979	-
AAEL008632	ABC transporter	ABC transporter	1.337	68434	-
AAEL008635	ABC transporter	ABC transporter	1.337	470559	-
AAEL008638	cytochrome P450 CYP49A1	P450	1.338	345451	+
AAEL008663	aldo-keto reductase	Other detox	1.339	1267343	-
AAEL008672	ABC transporter	ABC transporter	1.34	378892	+
AAEL008749	glycosyltransferase	UGT	1.346	246228	-
AAEL008751	glycosyltransferase	UGT	1.346	286509	-
AAEL008764	cuticle protein	Cuticle	1.347	521350	-
AAEL008765	cuticle protein	Cuticle	1.347	238289	-
AAEL008817	hexamerin 2 beta	Other	1.349	963012	+
AAEL008846	cytochrome P450 CYP9J32	P450	1.352	153931	-
AAEL008866	pupal cuticle protein	Cuticle	1.353	530154	+
AAEL008869	pupal cuticle protein	Cuticle	1.353	510802	-
AAEL008872	pupal cuticle protein	Cuticle	1.353	493461	-
AAEL008873	pupal cuticle protein	Cuticle	1.353	521025	+
AAEL008889	cytochrome P450 CYP6AL1	P450	1.354	547402	+
AAEL008898	sulfotransferase	Other detox	1.355	665679	-
AAEL008915	ATP-sensitive potassium channel	Ion channel	1.357	271789	-
AAEL008965	adult cuticle protein	Cuticle	1.361	762383	-
AAEL008967	adult cuticle protein	Cuticle	1.361	830666	+
AAEL008969	adult cuticle protein	Cuticle	1.361	782145	+
AAEL008973	adult cuticle protein	Cuticle	1.361	305427	-
AAEL008980	adult cuticle protein	Cuticle	1.361	300243	+
AAEL008982	adult cuticle protein	Cuticle	1.361	823112	-
AAEL008983	adult cuticle protein	Cuticle	1.361	732189	+
AAEL008986	pupal cuticle protein	Cuticle	1.361	846643	-
AAEL008988	adult cuticle protein	Cuticle	1.361	600317	+
AAEL008991	adult cuticle protein	Cuticle	1.361	295233	+
AAEL008994	adult cuticle protein	Cuticle	1.361	193820	-
AAEL008996	adult cuticle protein	Cuticle	1.361	284490	-
AAEL008999	adult cuticle protein	Cuticle	1.361	771511	-
AAEL009001	adult cuticle protein	Cuticle	1.361	860283	-
AAEL009005	adult cuticle protein	Cuticle	1.361	891877	+
AAEL009013	adult cuticle protein	Cuticle	1.361	796414	-
AAEL009016	glutathione transferase GSTT2	GST	1.362	1365747	-
AAEL009017	glutathione transferase GSTT1	GST	1.362	1360128	+
AAEL009018	cytochrome P450 CYP6Z?	P450	1.362	639420	-
AAEL009020	glutathione transferase GSTT3	GST	1.362	1358886	+
AAEL009029	aldehyde dehydrogenase	Other detox	1.363	720199	-
AAEL009044	amine oxidase	Other detox	1.364	627281	-
AAEL009045	amine oxidase	Other detox	1.364	601449	-
AAEL009050	amine oxidase	Other detox	1.364	619873	+
AAEL009051	thioredoxin Peroxidase TPX5	Red/Ox	1.364	537823	+
AAEL009117	cytochrome P450 CYP6M5	P450	1.371	484911	+
AAEL009119	conserved hypothetical protein	Other	1.371	446584	+
AAEL009120	cytochrome P450 CYP6S3	P450	1.371	407887	+
AAEL009121	cytochrome P450 CYP6N9	P450	1.371	339397	-
AAEL009122	cytochrome P450 CYP6N?	P450	1.371	433630	-
AAEL009123	cytochrome P450 CYP6Z6	P450	1.371	745129	+
AAEL009124	cytochrome P450 CYP6N12	P450	1.371	393871	+
AAEL009125	cytochrome P450 CYP6M10	P450	1.371	504403	+
AAEL009126	cytochrome P450 CYP6N6	P450	1.371	385036	+
AAEL009127	cytochrome P450 CYP6M11	P450	1.371	515318	+
AAEL009128	cytochrome P450 CYP6M6	P450	1.371	471522	-
AAEL009129	cytochrome P450 CYP6Z9	P450	1.371	780515	+
AAEL009130	cytochrome P450 CYP6Z7	P450	1.371	755352	-
AAEL009131	cytochrome P450 CYP6Z8	P450	1.371	767928	+
AAEL009132	cytochrome P450 CYP6Y3	P450	1.371	459039	-
AAEL009133	cytochrome P450 CYP6N14	P450	1.371	419752	+
AAEL009134	aldo-keto reductase	Other detox	1.371	1025612	+
AAEL009137	cytochrome P450 CYP6N13	P450	1.371	409686	+
AAEL009138	cytochrome P450 CYP6N11	P450	1.371	370239	-
AAEL009174	glycosyltransferase	UGT	1.376	463671	-
AAEL009199	galactosyltransferase	Other detox	1.378	1129659	+
AAEL009228	adrenodoxin	Other detox	1.381	758100	-
AAEL009351	thioredoxin	Red/Ox	1.391	749218	+
AAEL009453	voltage-gated potassium channel	Ion channel	1.397	957774	+
AAEL009591	cytochrome P450 CYP9M8	P450	1.41	989129	-
AAEL009619	voltage-gated potassium channel	Ion channel	1.412	420539	-
AAEL009625	short-chain dehydrogenase	Other detox	1.413	148090	-
AAEL009628	short-chain dehydrogenase	Other detox	1.413	168351	+
AAEL009631	short-chain dehydrogenase	Other detox	1.413	130120	+
AAEL009632	short-chain dehydrogenase	Other detox	1.413	124002	-
AAEL009656	cytochrome P450 CYP6AL3	P450	1.415	96713	-
AAEL009664	aldehyde dehydrogenase	Other detox	1.417	904388	+
AAEL009685	oxidoreductase	Other detox	1.418	798170	-
AAEL009708	thioredoxin M	Red/Ox	1.42	479285	-
AAEL009762	cytochrome P450 CYP307A1	P450	1.427	931725	-
AAEL009782	brain chitinase and chia	Cuticle	1.428	872519	+
AAEL009783	cuticle protein	Cuticle	1.429	775727	-
AAEL009784	cuticle protein	Cuticle	1.429	787168	-
AAEL009788	cuticle protein	Cuticle	1.429	777542	+
AAEL009790	cuticle protein	Cuticle	1.429	748100	-
AAEL009791	cuticle protein	Cuticle	1.429	769089	-
AAEL009793	cuticle protein	Cuticle	1.429	794255	-
AAEL009794	cuticle protein	Cuticle	1.429	753626	-
AAEL009796	cuticle protein	Cuticle	1.429	732048	-
AAEL009800	cuticle protein	Cuticle	1.429	684363	-
AAEL009801	cuticle protein	Cuticle	1.429	721304	+
AAEL009802	cuticle protein	Cuticle	1.429	743748	-
AAEL009807	cuticle protein	Cuticle	1.429	831282	+
AAEL009948	aldehyde dehydrogenase	Other detox	1.44	61468	-
AAEL010017	cytochrome B5 (cytb5)	Other detox	1.447	602854	+
AAEL010075	oxidoreductase	Other detox	1.451	645086	-
AAEL010127	pupal cuticle protein	Cuticle	1.455	231083	-
AAEL010130	pupal cuticle protein	Cuticle	1.455	138058	-
AAEL010134	pupal cuticle protein	Cuticle	1.455	50344	-
AAEL010137	ketoreductase	Other detox	1.456	626078	-
AAEL010151	cytochrome P450 CYP6N16	P450	1.457	793987	-
AAEL010154	cytochrome P450 CYP4AR2	P450	1.457	136956	+
AAEL010157	glutathione s-transferase microsomal	GST	1.457	275809	+
AAEL010158	cytochrome P450 CYP6N17	P450	1.457	768001	-
AAEL010179	NADPH oxidase	Other detox	1.458	730506	-
AAEL010245	chloride channel	Ion channel	1.465	582128	+
AAEL010273	cytochrome P450 CYP325Z1	P450	1.467	148707	-
AAEL010290	short-chain dehydrogenase	Other detox	1.468	552294	+
AAEL010343	aryl hydrocarbon receptor nuclear translocator	Other	1.472	75112	+
AAEL010359	ATP-dependent transporter	ABC transporter	1.473	244386	+
AAEL010366	glycosyltransferase	UGT	1.474	500249	-
AAEL010367	aldehyde oxidase	Other detox	1.474	382442	+
AAEL010370	aldehyde oxidase	Other detox	1.474	754871	-
AAEL010372	aldehyde oxidase	Other detox	1.474	781443	-
AAEL010379	ABC transporter	ABC transporter	1.474	313030	+
AAEL010380	aldehyde oxidase	Other detox	1.474	361143	+
AAEL010381	glycosyltransferase	UGT	1.474	516461	-
AAEL010382	aldehyde oxidase	Other detox	1.474	711241	-
AAEL010384	aldehyde oxidase	Other detox	1.474	686397	-
AAEL010386	glycosyltransferase	UGT	1.474	523611	+
AAEL010390	glycosyltransferase	UGT	1.474	829649	-
AAEL010391	aldehyde oxidase	Other detox	1.474	414258	+
AAEL010408	GPCR GABA B Family GPRGBB2	Other	1.476	455253	+
AAEL010500	glutathione transferase GSTX2	GST	1.481	875536	+
AAEL010570	acetylcholine receptor	Synaptic receptor	1.487	458844	-
AAEL010576	modifier of mdg4	Other	1.488	3461	-
AAEL010582	glutathione transferase GSTD11	GST	1.488	208815	+
AAEL010591	glutathione transferase GSTD6	GST	1.488	209959	+
AAEL010592	esterase	CCE	1.488	97440	+
AAEL010668	quinone oxidoreductase	Other detox	1.495	270358	-
AAEL010671	oxidoreductase	Other detox	1.495	595733	+
AAEL010677	oxidoreductase	Other detox	1.495	593489	+
AAEL010695	hypothetical protein	Other	1.497	121173	+
AAEL010710	GABA receptor	Synaptic receptor	1.499	670983	-
AAEL010764	aldehyde dehydrogenase	Other detox	1.507	569856	+
AAEL010777	thioredoxin TRX	Red/Ox	1.507	194815	+
AAEL010919	prophenoloxidase	PPO	1.52	666319	-
AAEL010946	cytochrome P450 CYP314A1	P450	1.524	213799	+
AAEL010963	brain chitinase and chia	Cuticle	1.527	672387	+
AAEL010977	ATP-dependent transporter	ABC transporter	1.529	122846	-
AAEL011045	pupal cuticle protein	Cuticle	1.536	554470	-
AAEL011112	alcohol dehydrogenase	Other detox	1.542	228885	-
AAEL011126	alcohol dehydrogenase	Other detox	1.542	233703	+
AAEL011129	alcohol dehydrogenase	Other detox	1.542	246111	+
AAEL011130	alcohol dehydrogenase	Other detox	1.542	233396	-
AAEL011169	hexamerin 2 beta	Other	1.546	400343	-
AAEL011239	short-chain dehydrogenase	Other detox	1.559	498997	+
AAEL011243	short-chain dehydrogenase	Other detox	1.559	507681	+
AAEL011265	ABC transporter	ABC transporter	1.561	434947	+
AAEL011269	ABC transporter	ABC transporter	1.561	159735	-
AAEL011280	voltage-dependent p/q type calcium channel	Ion channel	1.562	11183	-
AAEL011281	cytochrome B561	Other detox	1.562	667367	+
AAEL011313	epoxide hydrolase	Other detox	1.566	669403	-
AAEL011314	epoxide hydrolase	Other detox	1.566	696484	-
AAEL011356	alcohol dehydrogenase	Other detox	1.571	513607	-
AAEL011444	pupal cuticle protein	Cuticle	1.581	456672	-
AAEL011450	alcohol dehydrogenase	Other detox	1.581	632399	+
AAEL011463	cytochrome P450 CYP302A?	P450	1.581	197778	-
AAEL011488	short-chain dehydrogenase	Other detox	1.584	21692	+
AAEL011496	chitinase	Cuticle	1.584	111706	-
AAEL011498	Cu-Zn superoxide dismutase CUSOD3	Red/Ox	1.584	421902	+
AAEL011504	pupal cuticle protein	Cuticle	1.585	74569	+
AAEL011625	voltage-dependent calcium channel	Ion channel	1.595	697033	+
AAEL011741	glutathione transferase GSTS1	GST	1.607	101818	-
AAEL011752	glutathione transferase GSTI1	GST	1.608	620347	-
AAEL011756	aldehyde dehydrogenase	Other detox	1.608	518341	+
AAEL011761	cytochrome P450 CYP325M5	P450	1.61	660878	-
AAEL011763	prophenoloxidase PPO3	PPO	1.61	279238	-
AAEL011764	prophenoloxidase PPO10	PPO	1.61	295380	-
AAEL011769	cytochrome P450 CYP325M4	P450	1.61	688846	-
AAEL011770	cytochrome P450 CYP325L1	P450	1.61	651763	-
AAEL011825	aryl hydrocarbon receptor	Other	1.618	442803	-
AAEL011835	voltage-gated potassium channel	Ion channel	1.62	679595	-
AAEL011850	cytochrome P450 CYP315A1	P450	1.622	652330	+
AAEL011863	ABC transporter	ABC transporter	1.624	277315	-
AAEL011934	glutathione transferase GSTZ1	GST	1.632	205475	-
AAEL011937	glycosyltransferase	UGT	1.633	584425	-
AAEL011941	oxidase/peroxidase	Other detox	1.634	646758	+
AAEL011944	carboxy/choline esterase CCEAE3O	CCE	1.635	471086	+
AAEL012069	glutathione peroxidase GPXH1	Red/Ox	1.652	595903	+
AAEL012106	acetylcholine receptor	Synaptic receptor	1.656	559342	+
AAEL012120	fad oxidoreductase	Other detox	1.657	568908	-
AAEL012144	cytochrome P450 CYP303A1	P450	1.66	437121	+
AAEL012162	aldehyde dehydrogenase	Other detox	1.662	590574	+
AAEL012165	aldehyde dehydrogenase	Other detox	1.662	500144	+
AAEL012170	ABC transporter	ABC transporter	1.662	13565	+
AAEL012189	ABC transporter	ABC transporter	1.664	689083	+
AAEL012192	ABC transporter	ABC transporter	1.664	660781	-
AAEL012266	cytochrome P450 CYP4C38	P450	1.673	3143	+
AAEL012268	brain chitinase and chia	Cuticle	1.673	377206	-
AAEL012297	sterol desaturase	Other detox	1.676	486578	+
AAEL012298	sterol desaturase	Other detox	1.676	522280	+
AAEL012370	brain chitinase and chia	Cuticle	1.684	318729	-
AAEL012386	ABC transporter	ABC transporter	1.688	87144	+
AAEL012395	ABC transporter	ABC transporter	1.688	67827	-
AAEL012401	short-chain dehydrogenase	Other detox	1.689	180389	-
AAEL012422	sterol desaturase	Other detox	1.695	522435	+
AAEL012425	sterol desaturase	Other detox	1.695	449789	+
AAEL012433	short-chain dehydrogenase	Other detox	1.696	340951	-
AAEL012455	alcohol dehydrogenase	Other detox	1.699	551559	+
AAEL012457	alcohol dehydrogenase	Other detox	1.699	543523	-
AAEL012467	brain chitinase and chia	Cuticle	1.7	100797	-
AAEL012481	heme peroxidase HPX6	Red/Ox	1.702	225812	-
AAEL012491	cytochrome P450 CYP6P12	P450	1.702	59458	-
AAEL012492	cytochrome P450 CYP6AA5	P450	1.702	29018	-
AAEL012494	cytochrome P450 CYP6BZ1	P450	1.702	57628	-
AAEL012636	cytochrome b5	Other detox	1.72	97267	-
AAEL012698	ABC transporter	ABC transporter	1.726	450626	+
AAEL012700	ABC transporter	ABC transporter	1.726	388899	+
AAEL012701	ABC transporter	ABC transporter	1.726	409854	+
AAEL012702	ABC transporter	ABC transporter	1.726	371337	+
AAEL012761	cytochrome P450 CYP325T2	P450	1.738	120774	+
AAEL012762	cytochrome P450 CYP325N2	P450	1.738	197402	-
AAEL012765	cytochrome P450 CYP325M3	P450	1.738	190598	+
AAEL012766	cytochrome P450 CYP325G2	P450	1.738	232914	+
AAEL012769	cytochrome P450 CYP325M2	P450	1.738	141708	-
AAEL012770	cytochrome P450 CYP325N1	P450	1.738	79977	+
AAEL012772	cytochrome P450 CYP325G3	P450	1.738	105444	+
AAEL012773	cytochrome P450 CYP325M1	P450	1.738	41662	+
AAEL012832	cytochrome B561	Other detox	1.747	752753	-
AAEL012836	cytochrome B561	Other detox	1.747	680965	-
AAEL012883	pupal cuticle protein	Cuticle	1.753	815	+
AAEL013078	glycosyltransferase	UGT	1.787	448483	-
AAEL013096	aldo-keto reductase	Other detox	1.789	404281	+
AAEL013171	heme peroxidase HPX2	Red/Ox	1.801	95811	+
AAEL013277	voltage-gated sodium channel	Ion channel	1.817	67910	+
AAEL013372	ABC transporter	ABC transporter	1.83	256110	+
AAEL013380	adult cuticle protein	Cuticle	1.832	356134	+
AAEL013385	brain chitinase and chia	Cuticle	1.833	73314	-
AAEL013407	catalase CAT1	Red/Ox	1.839	136402	-
AAEL013483	short-chain dehydrogenase	Other detox	1.855	301195	-
AAEL013491	short-chain dehydrogenase	Other detox	1.855	270992	-
AAEL013492	prophenoloxidase PPO5	PPO	1.856	202518	-
AAEL013493	prophenoloxidase PPO7	PPO	1.856	159257	-
AAEL013496	prophenoloxidase PPO8	PPO	1.856	131513	-
AAEL013498	prophenoloxidase PPO1	PPO	1.856	244763	-
AAEL013499	prophenoloxidase PPO2	PPO	1.856	258751	+
AAEL013501	prophenoloxidase PPO4	PPO	1.856	108819	-
AAEL013512	pupal cuticle protein	Cuticle	1.861	76787	+
AAEL013514	pupal cuticle protein	Cuticle	1.861	127889	+
AAEL013515	pupal cuticle protein	Cuticle	1.861	67781	+
AAEL013516	pupal cuticle protein	Cuticle	1.861	91807	+
AAEL013517	pupal cuticle protein	Cuticle	1.861	18934	+
AAEL013520	pupal cuticle protein	Cuticle	1.861	118186	+
AAEL013528	thioredoxin peroxidase TPX1	Red/Ox	1.863	362457	+
AAEL013554	cytochrome P450 CYP4J14	P450	1.869	375821	+
AAEL013555	cytochrome P450 CYP4J13	P450	1.869	373885	+
AAEL013556	cytochrome P450 CYP4J15	P450	1.869	390224	-
AAEL013601	short-chain dehydrogenase	Other detox	1.882	368766	+
AAEL013603	short-chain dehydrogenase	Other detox	1.882	334917	+
AAEL013652	oxidoreductase	Other detox	1.89	257832	+
AAEL013757	hexamerin 2 beta	Other	1.911	294736	-
AAEL013759	hexamerin 2 beta	Other	1.911	177825	+
AAEL013798	cytochrome P450 CYP4H33	P450	1.923	348864	+
AAEL013829	cuticle protein	Cuticle	1.933	169678	+
AAEL013833	ABC transporter	ABC transporter	1.936	247584	-
AAEL013834	ABC transporter	ABC transporter	1.936	291553	-
AAEL013881	voltage-dependent calcium channel	Ion channel	1.949	323709	-
AAEL013972	sulfotransferase	Other detox	1.975	356641	+
AAEL013976	sulfotransferase	Other detox	1.975	366524	+
AAEL013981	hexamerin 2 beta	Other	1.976	322798	+
AAEL013983	hexamerin 2 beta	Other	1.976	313171	-
AAEL013990	hexamerin 2 beta	Other	1.976	305016	+
AAEL014019	cytochrome P450 CYP4J16	P450	1.985	63285	+
AAEL014077	FAD oxidoreductase	Other detox	1.999	64667	-
AAEL014080	aldehyde dehydrogenase	Other detox	1.1002	133920	+
AAEL014091	Cu-Zn superoxide dismutase CUSOD1	Red/Ox	1.1003	84656	+
AAEL014162	potassium channel kcnq,	Ion channel	1.1022	210399	+
AAEL014208	cytochrome P450 CYP307B?	P450	1.1036	96120	+
AAEL014244	glycosyltransferase	UGT	1.1047	36776	+
AAEL014246	glycosyltransferase	UGT	1.1047	30146	+
AAEL014279	glycosyltransferase	UGT	1.1056	90040	+
AAEL014371	glycosyltransferase	UGT	1.1092	249503	-
AAEL014379	adrenodoxin	Other detox	1.1094	186190	-
AAEL014411	cytochrome P450 CYP304B3	P450	1.1104	163666	+
AAEL014412	cytochrome P450 CYP304B2	P450	1.1104	139420	+
AAEL014413	cytochrome P450 CYP304C1	P450	1.1104	107128	+
AAEL014416	pupal cuticle protein	Cuticle	1.1108	91245	+
AAEL014428	ABC transporter	ABC transporter	1.1111	167264	+
AAEL014493	aldehyde oxidase	Other detox	1.1132	13869	+
AAEL014544	prophenoloxidase PPO6	PPO	1.1157	139303	+
AAEL014548	thioredoxin peroxidase TPX3	Red/Ox	1.1159	109828	+
AAEL014594	cytochrome P450 CYP301A1	P450	1.1181	12139	-
AAEL014603	cytochrome P450 CYP9J30	P450	1.1188	2927	-
AAEL014604	cytochrome P450 CYP9J?	P450	1.1188	110232	-
AAEL014605	cytochrome P450 CYP9J?	P450	1.1188	153819	-
AAEL014606	cytochrome P450 CYP9J7	P450	1.1188	75970	-
AAEL014607	cytochrome P450 CYP9J?	P450	1.1188	47248	+
AAEL014608	cytochrome P450 CYP9J?	P450	1.1188	121211	-
AAEL014609	cytochrome P450 CYP9J26	P450	1.1188	49551	-
AAEL014610	cytochrome P450 CYP9J29	P450	1.1188	12946	-
AAEL014611	cytochrome P450 CYP9F?	P450	1.1188	125892	-
AAEL014612	cytochrome P450 CYP9J?	P450	1.1188	105486	-
AAEL014613	cytochrome P450 CYP9J24	P450	1.1188	73219	-
AAEL014614	cytochrome P450 CYP9J?	P450	1.1188	136348	-
AAEL014615	cytochrome P450 CYP9J23	P450	1.1188	86223	-
AAEL014616	cytochrome P450 CYP9J27	P450	1.1188	185262	+
AAEL014617	cytochrome P450 CYP9J28	P450	1.1188	32148	+
AAEL014618	cytochrome P450 CYP9F?	P450	1.1188	127845	-
AAEL014619	cytochrome P450 CYP9J?	P450	1.1188	100138	-
AAEL014626	short-chain dehydrogenase	Other detox	1.1193	188740	+
AAEL014627	short-chain dehydrogenase	Other detox	1.1193	132925	+
AAEL014667	brain chitinase and chia	Cuticle	1.1213	12870	-
AAEL014678	cytochrome P450 CYP6F2	P450	1.1219	100146	-
AAEL014680	cytochrome P450 CYP6CA1	P450	1.1219	65877	-
AAEL014684	cytochrome P450 CYP6F3	P450	1.1219	88946	-
AAEL014689	NADPH cytochrome P450 reductase	Other detox	1.122	210719	-
AAEL014699	ABC transporter	ABC transporter	1.1224	80764	-
AAEL014769	adult cuticle protein	Cuticle	1.1266	7546	-
AAEL014829	cytochrome P450 CYP4J?	P450	1.1282	43688	-
AAEL014830	cytochrome P450 CYP4J?	P450	1.1282	29335	+
AAEL014837	prophenoloxidase PPO9	PPO	1.1286	16366	-
AAEL014840	short-chain dehydrogenase	Other detox	1.129	24439	-
AAEL014879	pupal cuticle protein	Cuticle	1.1321	137046	-
AAEL014890	cytochrome P450 CYP6CC1	P450	1.1327	134299	-
AAEL014891	cytochrome P450 CYP6P?	P450	1.1327	121982	-
AAEL014892	cytochrome P450 CYP6P?	P450	1.1327	120145	-
AAEL014893	cytochrome P450 CYP6BB2	P450	1.1327	46285	-
AAEL014899	short chain type dehydrogenase	Other detox	1.133	36035	-
AAEL014924	cytochrome P450 CYP6Z?	P450	1.1337	31076	+
AAEL014935	cytochrome b5	Other detox	1.1348	68737	-
AAEL014949	hypothetical protein	Other	1.1353	258	-
AAEL014978	adult cuticle protein	Cuticle	1.1376	86494	+
AAEL014982	adult cuticle protein	Cuticle	1.1381	59731	+
AAEL014983	pupal cuticle protein	Cuticle	1.1381	170659	-
AAEL014984	adult cuticle protein	Cuticle	1.1381	158934	+
AAEL014987	adult cuticle protein	Cuticle	1.1381	146949	-
AAEL015002	aldo-keto reductase	Other detox	1.1393	35434	-
AAEL015034	alcohol dehydrogenase	Other detox	1.1411	49376	+
AAEL015067	ABC transporter	ABC transporter	1.1442	8853	-
AAEL015072	carboxylesterase	CCE	1.1449	59249	+
AAEL015113	prophenoloxidase	PPO	1.1493	30735	+
AAEL015116	prophenoloxidase	PPO	1.1493	22349	-
AAEL015119	cuticle protein	Cuticle	1.1499	58269	+
AAEL015146	ABC transporter	ABC transporter	1.152	51863	-
AAEL015163	cuticle protein	Cuticle	1.1534	718	+
AAEL015222	adult cuticle protein	Cuticle	1.1604	40110	-
AAEL015223	adult cuticle protein	Cuticle	1.1604	41870	+
AAEL015264	alpha-esterase	CCE	1.1678	38311	+
AAEL015281	adult cuticle protein	Cuticle	1.1698	18328	+
AAEL015282	adult cuticle protein	Cuticle	1.1698	13092	+
AAEL015298	hypothetical protein	Other	1.1754	14735	-
AAEL015305	sulfotransferase	Other detox	1.1776	2031	-
AAEL015354	oxidase/peroxidase	Other detox	1.1903	10621	+
AAEL015361	cytochrome P450 CYP325?	P450	1.1912	14776	+
AAEL015362	cytochrome P450 CYP325?	P450	1.1912	938	+
AAEL015363	cuticle protein	Cuticle	1.1919	3671	+
AAEL015364	cuticle protein	Cuticle	1.1919	2197	-
AAEL015370	pseudogene (P450)	P450	1.1931	4578	+
AAEL015424	adult cuticle protein	Cuticle	1.216	3070	-
AAEL015475	pseudogene (P450)	P450	1.256	6693	-
AAEL015476	pseudogene (P450)	P450	1.256	473	+
AAEL015563	cytochrome P450 CYP325?	P450	1.3299	967	+
AAEL015578	alpha-esterase	CCE	1.3489	24	+
AAEL015590	carboxy/choline esterase CCEJHE1O	CCE	1.3556	4188	-
AAEL015591	cytochrome P450 CYP325F?	P450	1.3561	411	+
AAEL015641	cytochrome P450 CYP6AH?	P450	1.4127	3353	+
AAEL015654	cytochrome P450 CYP6AG8	P450	1.4359	3271	+
AAEL015655	cytochrome P450 CYP302A1	P450	1.4395	1160	-
AAEL015663	cytochrome P450 CYP4J?	P450	1.4503	1211	-
AAEL015670	ABC transporter	ABC transporter	1.4629	1690	-
AAEL017029	phenylalanine hydroxylase ?	Other detox	1.712	449625	-
AAEL017085	glutathione transferase GSTO1	GST	1.76	650012	+
AAEL017098	tyrosine monooxygenase ?	Other detox	1.41	1587906	-
AAEL017120	tryptophan hydroxylase ?	Other detox	1.41	1155603	-
AAEL017136	cytochrome P450 CYP325V1	P450	1.6	4061807	-
AAEL017215	cytochrome P450 CYP325U1	P450	1.6	4043203	-
AAEL017297	cytochrome P450 CYP6M9	P450	1.371	498178	+
AAEL017366	cytochrome P450 CYP9J?	P450	1.1188	71085	-
AAEL017539	cytochrome P450 CYP6BY1	P450	1.7	1231022	-
AAEL017553	carboxy/choline esterase CCEAE2B	CCE	1.55	62851	+
AAEL017556	cytochrome P450 CYP6N?	P450	1.371	356461	-
a: P450 names ending with interrogation marks are not official. Their CYP subfamily is proposed according to best protein homology in mosquitoes.
